# Supplementary material for: STAT3 acts through pre-existing nucleosome-depleted regions bound by FOS during an epigenetic switch linking inflammation to cancer
Source: Epigenetics Chromatin. 2015 Feb 14;8:7. doi: 10.1186/1756-8935-8-7 (PMC4362815; doi:10.1186/1756-8935-8-7)
Supplement: Supplementary file 18 — Additional file 18: RNA expression values. Raw RNA MAS5 expression values for MCF10A-ER-Src cells treated with tamoxifen or ethanol, and control siNEG (siSCM) or siSTAT3 at various time points. (XLS 19 MB) [file 13072_2014_351_MOESM18_ESM.xls]

## Sheet: ER-Src RNA 5
Raw RNA expression values (MAS5)
	siNEG_EtOH_04hr_rep01	siNEG_EtOH_04hr_rep02	siNEG_EtOH_04hr_rep03	siNEG_EtOH_24hr_rep01	siNEG_EtOH_24hr_rep02	siNEG_EtOH_24hr_rep03	siNEG_TAM_04hr_rep01	siNEG_TAM_04hr_rep02	siNEG_TAM_04hr_rep03	siNEG_TAM_24hr_rep01	siNEG_TAM_24hr_rep02	siNEG_TAM_24hr_rep03	siSTAT3_EtOH_04hr_rep01	siSTAT3_EtOH_04hr_rep02	siSTAT3_EtOH_04hr_rep03	siSTAT3_EtOH_24hr_rep01	siSTAT3_EtOH_24hr_rep02	siSTAT3_EtOH_24hr_rep03	siSTAT3_TAM_04hr_rep01	siSTAT3_TAM_04hr_rep02	siSTAT3_TAM_04hr_rep03	siSTAT3_TAM_24hr_rep02	siSTAT3_TAM_24hr_rep03
1007_s_at	2439.44	3531.95	2585.7	2878.85	3352.92	2764.99	3045.68	2873.18	3001.43	3032.85	2746.68	2774.13	2513.76	2716.48	2780.34	2720.05	2682.58	2976.88	2697.19	2701.41	2870.13	4135.82	4574.94
1053_at	960.611	857.323	930.924	1137.27	1127.05	1230.63	826.134	852.643	1038.06	878.101	838.438	989.73	940.178	923.633	842.829	1080.55	1051.86	1178.66	852.071	927.992	870.927	910.738	1033.16
117_at	56.855	76.6362	75.5934	7.71647	58.9318	49.7062	57.3304	47.3959	96.3354	123.103	97.2493	119.864	55.1972	27.6774	61.5257	50.8223	47.5623	63.8882	65.0085	81.9648	56.0679	51.3146	42.2596
121_at	293.814	384.366	330.486	209.333	316.355	288.989	262.444	251.499	330.892	386.225	317.306	399.11	229.667	299.999	309.599	222.258	313.365	330.731	281.329	186.91	281.203	321.292	351.38
1255_g_at	9.052	20.6829	8.25884	42.6441	31.8744	4.7429	25.5875	32.0745	3.62465	27.1553	30.1363	22.4966	31.1354	32.6473	15.2821	39.7596	26.2179	23.293	34.8685	26.8317	39.5516	12.4941	53.1022
1294_at	92.9694	134.915	101.513	90.3289	113.012	107.813	82.1551	127.964	109.98	109.787	131.52	103.394	92.8504	70.5573	78.8213	62.2849	109.552	77.5705	91.3663	69.5141	85.1939	132.124	134.748
1316_at	164.128	232.159	203.907	246.666	224.37	248.75	174.441	171.424	191.208	253.676	150.792	225.117	159.629	180.83	130.241	161.614	188.606	235.001	196.034	133.132	143.617	178.212	201.239
1320_at	71.7798	82.96	80.4542	64.6606	37.9903	61.4505	72.506	65.2612	53.8362	80.6719	80.1133	87.1726	65.4894	54.2947	70.2817	51.7002	80.7411	80.9495	74.57	45.5215	64.9643	66.8545	67.5965
1405_i_at	29.5454	33.8036	29.117	39.4702	37.9718	23.9311	31.1003	22.9976	19.4359	15.5222	27.5136	23.4909	32.1413	20.3695	22.3955	11.5419	31.2449	36.2937	35.8591	16.6293	33.1395	34.9554	41.5867
1431_at	26.6417	34.5153	61.1259	18.5133	22.5413	36.6473	35.5056	32.3885	54.2127	16.1908	23.3835	17.9829	17.9235	37.8263	24.0652	31.2646	19.0125	23.7982	19.3968	18.981	52.3093	39.8164	15.876
1438_at	86.1296	63.4203	73.4319	64.5087	61.2875	66.9104	45.5766	76.1911	49.0208	11.529	18.8971	33.9866	135.404	134.522	137.313	69.2029	81.7759	47.076	103.864	107.37	108.192	51.2215	77.6177
1487_at	811.018	872.974	814.533	1085.38	1030.59	898.641	723.63	737.228	692.721	741.025	690.49	736.926	849.455	859.356	953.263	1049.63	1091.41	1095.08	684.738	730.108	942.144	935.883	1007.4
1494_f_at	75.895	100.411	88.7281	92.6563	94.7874	58.4651	70.7949	87.7058	71.0241	70.6588	42.2719	112.056	100.15	87.1412	105.737	56.2882	93.8431	92.2806	57.2438	74.1825	118.437	56.4164	141.436
1552256_a_at	1867.96	2365.58	1915.02	2217.26	2283.12	1981.45	1996.97	2265.94	1990.09	1431.63	1310.2	1198.32	2027.58	1642.63	1685.02	1733.92	2097.99	2100.36	1579.15	1620.92	1721.16	1837.95	2026.92
1552257_a_at	2558.8	2543.44	2625.27	2940.84	2861.53	2624.74	2412.91	2399.16	2288.74	2660.6	2466.41	2520.6	2558.81	2358.18	2615.57	2745.54	2828.95	2888.35	2526.23	2333.96	2482.89	2954.4	3255.25
1552258_at	84.5438	103.268	66.1587	113.596	85.6236	101.41	147.256	146.691	109.7	91.7465	87.3024	102.395	123.512	106.376	147.229	76.7053	60.0404	115.822	107.719	87.5401	127.673	104.842	70.1546
1552261_at	20.3014	21.86	54.321	38.64	13.7091	29.853	37.9162	28.0913	29.782	18.137	36.2393	28.111	6.64732	4.14006	8.50627	33.233	5.99949	53.6784	9.51881	30.1907	23.1361	41.4377	42.6026
1552263_at	461.442	384.1	430.717	435.461	407.951	383.382	445.38	328.38	397.805	436.692	419.58	497.111	432.512	426.827	529.858	572.152	541.929	544.459	468.601	529.728	532.078	593.98	485.839
1552264_a_at	397.378	311.652	414.871	488.216	403.832	475.519	451.399	425.015	387.516	606.879	445.638	541.24	484.601	516.919	452.679	589.442	562.622	502.859	427.86	426.059	553.801	614.437	469.959
1552266_at	32.5565	23.6529	40.3686	25.7831	3.73541	27.6863	25.3697	14.252	41.7586	28.9616	21.2079	31.4541	31.4559	12.1451	27.9253	31.1216	42.792	25.8406	27.723	46.8447	41.2566	41.6156	36.0559
1552269_at	36.5865	10.2446	38.5227	42.0427	22.4801	49.084	23.3527	34.6215	45.2751	45.4469	36.1157	52.2311	28.0191	21.0478	32.6691	36.4545	40.2281	43.6607	8.13237	54.6665	23.5868	6.81399	5.81496
1552271_at	4.97286	4.42803	4.78469	4.33769	3.88937	5.29329	3.62032	5.66033	7.61272	4.35059	2.86082	5.97538	3.1519	5.18642	7.56022	4.19736	3.61895	4.67479	7.6839	3.19334	4.00007	4.75228	4.71054
1552272_a_at	114.222	144.887	81.6476	71.9857	44.5032	82.7805	98.5732	91.7258	96.6435	81.1948	72.3715	28.0126	94.8979	114.175	91.1012	56.9069	52.5821	59.1696	61.6967	53.3266	89.1972	71.0216	63.3202
1552274_at	380.418	361.898	319.889	332.037	304.468	411.024	312.19	322.91	287.341	347.772	344.18	400.972	294.762	240.015	188.416	302.41	317.579	368.162	226.829	217.227	183.345	303.351	253.219
1552275_s_at	174.968	138.995	139.762	206.166	156.942	220.25	167.369	138.362	142.771	195.085	155.333	174.267	150.933	119.22	115.524	153.853	215.388	176.067	107.654	115.2	103.627	201.26	182.442
1552276_a_at	86.7985	106.326	74.2859	71.7596	84.8351	70.7382	96.2864	56.4066	31.63	133.776	92.4346	66.6324	103.461	33.2981	74.0874	82.079	91.2835	43.0737	83.5616	99.1885	90.2585	114.438	95.2192
1552277_a_at	1601.58	1641.68	1531.64	1265.93	1333.79	1215.81	1937.22	2089.32	2103.75	2415.87	2340.31	2380.76	1618.18	1667	1619.76	1449.29	1363.05	1300.62	1648.43	1758.62	1719.69	1922.32	1750.64
1552278_a_at	113.369	145.143	122.098	107.353	85.786	101.111	110.202	114.395	101.845	65.8756	46.4051	48.7669	133.588	133.565	124.008	80.4583	91.8005	127.505	207.451	188.354	194.599	101.976	102.3
1552279_a_at	491.095	442.094	423.012	229.929	272.783	272.488	413.105	423.16	372.928	222.192	204.798	202.6	641.115	677.174	710.441	273.9	282.007	298.724	1228.7	1204.19	1144.43	288.962	333.648
1552280_at	12.2472	20.2201	24.3585	4.78252	5.75989	6.32755	15.8926	9.93383	2.73001	3.50345	10.1607	16.6337	4.38212	6.33425	8.01551	9.05087	24.2398	12.9619	14.1	4.20939	25.6017	11.7772	4.26734
1552281_at	75.3202	122.603	68.0322	55.3594	36.61	103.432	96.0095	32.7726	74.8182	35.1101	81.9194	94.4364	75.5243	81.6687	89.6148	101.609	85.8537	49.6254	96.9185	84.9023	119.02	76.0811	79.7474
1552283_s_at	66.4116	69.2791	53.5456	46.6692	46.5603	28.8236	20.3579	54.5409	59.3109	3.81524	9.71459	11.9406	30.4861	21.8655	46.56	27.9877	57.4517	39.0408	27.9988	37.3816	45.3408	30.6551	36.0731
1552286_at	192.191	195.53	172.518	215.665	258.288	250.777	151.638	191.507	171.557	253.559	260.203	268.639	172.117	155.837	182.582	182.803	238.593	271.334	168.156	133.426	127.272	216.364	188.504
1552287_s_at	850.36	915.971	788.953	637.723	686.915	720.205	775.346	752.526	868.674	554.293	586.701	648.751	819.298	741.118	811.336	595.363	600.316	598.687	757.323	713.173	666.695	532.34	543.475
1552288_at	20.5187	26.9412	12.4217	6.52256	27.3159	4.0838	29.6094	12.9126	28.8321	16.0585	2.39834	6.63758	28.5417	19.7214	16.5311	13.0957	18.1127	19.3916	10.0755	3.6448	36.0407	22.178	25.0048
1552289_a_at	48.7521	31.5876	31.374	11.7667	33.0406	49.916	17.8753	35.133	66.5283	39.4501	61.2044	46.3393	34.4436	52.1805	38.0802	37.7753	60.2411	24.6682	55.3422	23.9582	46.0584	38.5576	44.6553
1552291_at	1264.94	1180.81	1227.14	1129.06	1129.71	1385.75	1248.65	813.022	1502.64	1203.99	1013.91	1117.18	1208.06	1324.12	1308.77	1340.86	1275.56	1171.7	1229.98	1317.14	1219.62	1041.73	737.995
1552293_at	41.2018	66.685	23.8001	67.8644	85.0388	98.6292	68.1132	44.9633	59.1858	52.5726	10.7932	55.3216	82.5754	44.2894	51.2605	38.4141	85.1315	87.5878	54.8085	37.1718	68.4676	56.443	85.3402
1552295_a_at	261.783	365.93	444.324	292.909	289.278	317.615	296.201	324.792	298.421	302.989	355.028	282.615	391.108	300.217	426.029	376.057	345.128	311.988	392.308	229.513	353.309	340.667	404.862
1552296_at	9.70761	28.9779	21.7877	11.5068	39.4909	10.6226	29.418	20.9275	57.3196	6.25607	8.01961	14.063	43.0916	34.6503	7.33043	9.42506	11.1648	13.9353	27.902	9.67906	24.9389	11.4577	13.495
1552299_at	69.3128	60.6557	94.2425	75.6376	48.2987	42.1373	56.3763	51.425	61.4731	85.9751	78.4625	72.106	59.4022	49.0794	78.6259	67.8601	92.0557	74.6663	62.1694	82.3789	78.1253	82.8593	49.7426
1552301_a_at	60.3282	79.5551	55.3134	26.629	85.1555	62.6364	32.5507	56.7187	67.0564	73.6609	69.9825	54.2146	78.1006	86.7687	51.0911	62.9078	69.1013	58.9327	62.9098	86.7715	74.768	80.5358	101.538
1552302_at	24.4822	26.4859	8.85154	16.7383	9.57207	20.2629	35.7328	15.0434	28.7295	17.4267	22.3638	20.9534	22.191	19.1414	21.2887	20.3944	14.9943	20.7866	18.2298	29.1059	27.7391	24.2411	33.2715
1552303_a_at	97.5998	93.9221	97.9351	75.7874	106.118	64.5443	74.2095	78.4038	82.6921	87.7679	93.1354	109.806	67.0337	89.7271	48.6933	81.8459	59.0266	100.378	110.852	56.0504	78.1171	81.3838	94.2838
1552304_at	64.64	92.0292	81.7241	75.6096	86.4954	82.3572	51.7816	48.9327	74.1688	83.8218	103.092	92.5021	56.0888	87.4251	100.639	94.8552	79.0465	100.848	86.2688	93.0871	48.0136	49.3625	65.8145
1552306_at	148.257	176.909	157.268	150.686	143.421	180.848	143.86	179.034	166.336	140.887	148.883	133.645	201.111	150.934	233.016	221.129	182.957	144.327	235.167	172.864	178.443	178.656	132.317
1552307_a_at	175.933	234.449	218.798	223.713	256.412	247.203	189.101	144.948	133.782	217.888	194.943	223.65	219.425	226.85	208.744	189.881	279.639	277.413	214.145	201.814	209.573	235.367	248.195
1552309_a_at	643.708	678.246	522.461	174.201	205.301	226.28	673.567	558.973	555.914	63.2024	93.8309	96.6401	1039.91	1092.94	986.37	342.929	388.703	357.118	1294.38	1208.41	1245.14	619.54	644.677
1552310_at	603.111	677.248	689.131	652.845	726.724	733.208	600.098	598.726	542.05	526.47	522.497	581.656	665.785	681.78	604.638	660.725	721.754	634.641	613.369	587.931	602.471	554.663	550.402
1552311_a_at	62.7123	136.089	88.6947	111.33	112.267	131.838	93.4181	111.904	105.208	134.024	115.676	140.297	130.89	61.3072	95.352	83.6997	101.052	179.092	77.7863	97.6492	74.3563	112.501	117.964
1552312_a_at	419.151	477.612	383.039	370.065	366.821	311.46	454.348	489.468	360.634	338.375	268.323	312.588	413.875	467.907	349.392	386.91	370.072	373.924	370.243	400.276	419.562	387.056	392.892
1552314_a_at	62.9465	71.9572	67.6871	69.4533	65.6198	69.2744	55.4348	106.477	90.6368	59.0213	48.4355	76.0514	103.191	82.8383	96.8072	64.4956	92.1182	109.167	85.5145	65.9091	73.8127	71.6524	55.845
1552315_at	72.7735	25.7997	70.7558	59.5157	80.4818	29.6981	79.079	5.42375	56.3305	56.5901	69.5933	49.7363	54.7024	64.504	23.8005	39.3329	11.0918	41.711	11.1983	77.3733	63.7923	50.8679	70.5426
1552316_a_at	9.47685	4.28764	6.07056	3.77372	1.16743	9.65305	2.84628	4.28905	2.32347	25.8684	1.15423	5.54953	17.5679	1.96471	21.9454	10.2165	28.4764	2.81178	2.6125	10.4902	17.1279	22.4432	7.20222
1552318_at	39.7076	5.65712	24.3077	5.89532	24.0122	29.5387	5.46931	35.9006	31.9558	39.2826	23.0875	34.4114	24.613	6.71102	31.1841	48.1001	26.5361	4.86991	35.6322	5.81547	7.90638	31.2215	23.7575
1552319_a_at	14.684	42.8364	4.59977	48.125	18.4995	43.4251	30.1308	8.1749	19.095	38.8303	5.67542	24.5023	22.9051	30.7051	41.5332	40.6321	45.4775	65.9777	55.6401	54.7136	66.3143	14.7371	11.0802
1552320_a_at	3.65233	13.3343	9.2697	24.9288	6.98218	18.8989	11.0597	2.44613	3.15115	6.94965	13.4439	21.3048	28.5316	16.8024	6.19088	25.4716	4.07048	3.51949	25.1456	19.4965	9.06467	17.8221	38.349
1552321_a_at	3.48127	3.75869	1.76592	12.719	2.30338	1.82894	1.06123	3.72206	14.2782	1.74003	5.59972	14.5848	2.57819	2.68313	3.35291	3.89991	3.84023	3.06926	1.0962	3.90482	14.2778	2.22376	1.08855
1552322_at	20.0809	37.0431	42.3123	30.5392	18.5437	32.822	31.3603	23.9133	25.9483	31.4275	43.8099	40.8515	41.5608	39.9976	9.13448	24.1122	25.6071	31.6151	14.2662	9.34866	22.5878	32.3716	19.2008
1552323_s_at	31.8911	29.1237	44.1887	31.859	47.1126	30.1105	23.2452	25.4213	47.4393	56.883	51.2639	66.7535	36.957	35.421	32.3529	42.6055	35.5889	46.5398	38.1486	44.0672	48.6362	38.3388	50.7406
1552325_at	18.031	26.3596	17.9418	13.8106	19.8118	27.7815	25.112	21.5512	19.2524	21.6688	25.7807	21.7372	23.0313	29.0441	15.4281	10.5291	33.7539	24.2215	17.1624	27.6075	18.8961	25.076	22.589
1552326_a_at	35.839	75.7467	71.2146	56.2048	66.3344	56.9275	45.2719	19.0654	42.8397	25.7332	42.692	63.4414	9.88695	51.7847	31.1625	78.6003	62.7824	68.656	8.95567	60.0249	52.7293	72.7098	71.2025
1552327_at	4.54927	4.59864	18.3699	0.953943	2.42783	3.55469	1.89272	16.2065	3.65625	16.8632	22.0767	27.6453	13.8734	3.92786	3.825	18.4188	5.54398	2.42863	4.45588	13.5372	1.56751	16.2924	7.17015
1552329_at	291.516	290.038	321.563	227.977	307.681	319.983	363.57	314.58	345.567	285.093	325.05	292.477	266.38	298.709	296.54	309.116	284.864	318.365	296.393	292.738	281.89	257.016	207.918
1552330_at	93.1562	96.5344	86.6789	133.953	96.6557	138.581	98.617	77.002	69.9472	124.722	147.669	113.436	87.7545	93.5328	109.447	95.2567	127.003	127.981	86.1848	76.1919	74.6566	126.493	113.325
1552332_at	208.089	203.338	248.092	337.327	355.547	366.232	171.885	189.203	170.19	265.367	231.578	195.79	237.469	238.814	273.81	391.431	445.61	470.366	255.317	291.227	298.381	366.738	403.975
1552334_at	339.142	381.806	323.442	343.139	413.371	426.948	190.156	338.219	286.23	307.68	258.227	253.406	381.413	279.536	444.499	507.085	620.725	456.915	337.832	258.731	279.708	490.819	653.039
1552335_at	108.005	131.546	81.6902	116.221	97.6904	145.51	104.053	111.098	114.214	128.983	103.84	119.967	131.739	134.383	134.008	117.992	230.86	207.172	89.5542	130.707	129.123	210.645	175.195
1552337_s_at	2.07243	3.82791	5.22891	6.81594	2.64414	26.8897	4.55705	4.48967	16.026	1.8977	4.91234	16.7741	3.43517	1.16323	2.81035	3.32938	2.26718	4.48741	5.67663	2.18152	6.51312	4.36596	7.82459
1552338_at	1.51056	4.03981	3.09879	2.63962	2.03082	2.24013	1.8767	1.9129	2.5695	2.35748	3.4408	2.05587	2.4317	1.34281	2.45421	1.55058	1.65752	1.88028	1.79087	1.84378	1.84006	1.58569	2.40347
1552340_at	6.02932	12.8696	10.4416	10.5206	10.258	11.6518	7.32763	27.9108	9.45898	3.31478	8.01922	5.47595	6.81703	4.39609	6.52528	34.2691	10.7985	38.8152	7.74081	8.41383	8.28411	7.55546	9.5814
1552343_s_at	180.093	187.228	154.938	153.779	166.233	164.529	140.268	153.88	97.9299	189.077	143.682	171.119	152.863	163.027	149.511	170.336	192.601	195.274	122.257	139.813	125.524	166.574	164.029
1552344_s_at	504.369	473.537	552.53	532.351	565.771	544.838	546.817	480.18	523.05	502.845	461.43	470.497	513.58	560.871	507.482	551.965	503.611	461.659	529.924	474.513	527.772	541.7	481.568
1552347_at	473.002	528.899	530.253	492.131	534.436	603.049	487.022	465.824	478.16	544.821	529.392	567.436	444.412	508.339	445.422	564.59	544.839	567.788	413.624	399.466	474.423	562.133	473.129
1552348_at	6.17812	46.0222	17.4666	27.9938	21.9234	10.9761	27.7319	34.3064	32.3019	64.897	70.9891	52.8827	33.248	39.5168	43.6241	46.099	6.77942	9.03028	51.593	64.9107	71.967	29.0686	33.1722
1552349_a_at	12.518	34.6911	5.46186	27.3422	7.872	36.9011	7.86195	35.7438	20.8933	10.9156	18.8306	30.4738	6.47649	12.5903	7.18306	20.813	24.3092	18.7995	24.3986	3.14494	4.23933	25.7745	15.2619
1552354_at	5.93247	8.69452	8.48689	8.93649	8.18753	10.7239	8.85262	6.65011	4.97439	7.53112	7.21735	9.58723	7.15443	4.81472	6.04682	7.16895	6.18054	9.8463	6.08677	10.9489	6.72365	7.40381	10.254
1552355_s_at	7.82595	10.8701	5.36188	5.38999	7.32223	7.65076	4.27261	34.4362	9.34982	11.952	4.59395	3.80315	7.26671	5.49992	9.07108	10.1572	7.04267	11.6265	3.86178	3.55937	8.0726	3.60111	16.0075
1552359_at	23.523	28.223	15.0952	2.88176	11.8452	17.5847	19.0557	16.325	19.5517	4.88775	18.481	5.46989	16.3087	19.7999	19.2852	17.8635	33.2558	13.0555	17.242	13.9717	21.2538	13.4566	5.62046
1552360_a_at	232.136	225.212	221.174	322.811	231.606	224.309	185.832	169.319	159.738	283.999	222.469	242.016	234.829	204.035	317.422	216.831	227.695	260.617	173.028	241.341	192.172	205.01	227.932
1552362_a_at	268.276	255.645	276.408	314.622	366.847	367.491	207.311	262.426	242.146	373.255	313.53	444.877	166.802	197.906	167.845	272.707	308.918	320.375	154.881	213.686	148.068	180.442	208.114
1552364_s_at	165.826	180.171	228.51	217.836	298.041	217.397	179.707	208.189	176.63	191.804	173.343	215.054	231.9	233.087	218.902	286.884	256.463	278.873	201.895	271.318	250.749	241.583	249.736
1552365_at	30.0565	16.1209	29.5284	19.4362	29.2901	15.4067	31.7191	15.5729	18.4573	14.9396	15.8054	18.6085	32.1131	29.3475	19.0545	15.219	26.1611	3.38403	8.76114	10.7915	11.9463	9.33154	43.7952
1552367_a_at	21.7121	7.54522	4.60454	31.0842	28.2528	23.0447	27.725	2.58778	20.3253	34.4245	33.2881	25.0653	22.7306	23.6102	36.6367	25.4806	16.1465	32.5329	33.3067	29.4496	33.2219	19.2652	26.1492
1552368_at	32.3334	35.6593	35.3449	38.6816	7.12506	16.0537	2.95988	41.8174	8.37956	7.64127	20.8016	40.7136	20.5044	4.50992	18.1159	20.0117	37.1723	32.1892	4.96626	10.5728	31.3365	12.8831	34.0051
1552370_at	284.353	247.508	258.945	474.638	367.932	413.936	270.117	233.731	249.618	430.138	371.77	351.374	333.317	356.28	329.059	493.26	484.845	511.343	344.683	385.212	326.847	585.081	492.501
1552372_at	7.46965	4.6799	5.59963	1.9455	9.66873	0.86306	2.36821	0.335027	6.80821	1.99283	0.425029	0.375694	0.485153	0.639818	0.695421	2.73384	7.89696	3.49909	1.36692	2.98114	0.537619	1.13145	0.434345
1552373_s_at	23.2648	7.48451	14.2132	15.7435	17.2213	32.0633	9.89906	3.46151	24.3138	22.3534	15.798	14.1219	6.24754	21.3302	3.10014	25.4683	25.099	7.45335	11.9521	6.22427	25.6378	7.21157	1.95367
1552375_at	69.3647	90.8692	60.6923	58.718	69.2923	57.6589	80.9157	66.8042	82.58	61.7562	50.0598	61.5573	88.6603	93.0661	68.1502	54.5865	36.7714	79.4655	83.8168	106.895	68.5402	58.575	56.7339
1552377_s_at	128.927	129.092	78.1793	128.757	151.09	161.386	128.727	151.09	106.815	153.954	116.981	219.159	108.618	124.631	138.59	110.895	121.636	98.0393	140.538	143.803	136.967	126.554	83.4637
1552378_s_at	42.0784	66.4909	101.156	123.508	76.7551	74.89	51.6264	57.0776	69.6976	65.8129	71.3551	71.5525	117.318	154.229	118.574	74.9897	93.942	75.7664	85.3825	71.9068	80.0717	81.5717	83.9288
1552379_at	33.6482	23.9361	16.258	27.3649	2.91464	21.8469	25.2179	22.9484	12.1017	11.1819	14.3812	24.8224	5.03166	39.0987	29.634	19.1863	33.1495	23.7513	16.3942	27.2561	21.728	22.8374	14.9745
1552381_at	112.75	97.6178	115.245	107.922	158.86	94.4901	150.717	110.522	113.015	171.808	183.892	224.085	71.8869	94.9029	99.2603	44.5068	73.8369	66.2903	58.1658	68.3948	58.3689	62.5942	38.2369
1552383_at	45.1207	99.7161	64.0979	86.724	76.8318	40.062	42.4049	51.1659	61.7575	77.511	27.1366	68.4198	66.0532	51.8644	52.8915	48.2131	43.0751	65.9206	70.9128	35.5572	60.8865	45.2488	80.0056
1552384_a_at	38.3518	44.7257	55.1515	37.5111	36.4788	41.9045	25.6205	35.036	30.6093	34.8207	28.8176	50.5717	22.1261	52.754	27.8806	40.0696	52.982	37.5248	45.4771	37.6874	43.0896	35.4062	13.9014
1552386_at	7.00443	20.2857	16.106	6.6999	0.717825	7.07278	11.5013	15.4618	11.8052	0.776505	15.4106	8.08272	20.2218	9.11551	1.29797	15.2257	10.1114	16.8466	7.7573	22.8265	3.14639	3.97753	6.55219
1552388_at	53.2977	19.539	16.7777	55.9761	10.5267	12.4356	11.8441	45.8001	53.8922	18.8298	19.4414	19.238	10.0074	14.5312	16.6005	11.9689	10.7383	18.7043	98.1217	9.15216	39.088	30.5713	18.9346
1552389_at	52.541	47.9577	47.4248	82.8773	77.3136	73.2158	36.2951	39.3732	40.4221	56.5875	58.0586	58.7416	40.2581	45.8389	49.4452	66.3989	79.2473	75.0018	33.2038	40.2986	55.2877	102.993	101.96
1552390_a_at	149.17	141.433	127.004	214.171	196.95	210.84	118.448	139.39	149.441	156.018	214.109	163.305	121.146	120.488	144.854	193.183	237.876	235.243	138.992	136.43	135.67	256.451	256.198
1552391_at	51.305	35.7703	19.759	21.1965	36.4142	55.5015	51.7103	29.0564	43.1149	44.483	52.1	42.452	80.844	53.1561	23.8093	20.1336	55.3286	46.4985	54.0399	33.1524	25.9316	33.2961	33.9582
1552393_at	39.6799	69.3806	25.857	51.4089	38.1157	21.1058	16.2521	57.7466	31.7394	40.5599	40.7442	28.721	18.6712	38.4145	36.8034	39.9226	37.4145	39.0251	34.6678	52.5402	36.5557	48.6347	51.9679
1552394_a_at	3.95007	2.41802	1.1261	20.3018	3.00173	15.3035	3.08381	21.9064	3.76442	13.0928	2.10603	18.3918	1.44036	14.0109	5.57488	18.5559	2.19679	2.90047	2.54597	2.47405	3.45925	6.58458	28.2657
1552395_at	15.9344	26.13	27.7898	32.2803	29.2174	28.057	33.4376	20.678	27.9246	28.7976	25.5277	31.3678	17.6663	23.3054	17.3137	21.4395	26.253	39.0054	18.554	16.2564	40.1819	16.5158	27.9598
1552396_at	37.5996	13.6568	14.7846	8.01516	51.4647	5.01998	58.6188	45.5102	43.1827	75.3412	66.4949	73.6954	67.8789	56.2686	8.08303	6.3016	66.8001	80.3844	14.9936	39.8113	66.3558	84.5527	74.3933
1552398_a_at	5.40627	5.20536	4.76691	4.52858	4.61421	1.89336	40.7332	7.51185	6.08794	14.2525	25.9216	7.20827	13.9239	23.9229	9.15596	4.56173	2.53141	4.8683	30.3258	5.64818	2.56087	9.38497	2.8286
1552399_a_at	59.7953	48.2146	28.5684	62.4018	76.8422	69.7025	63.2129	59.774	30.9204	58.1496	43.1493	8.46457	19.066	39.173	8.96585	37.7475	9.04225	70.2798	31.2099	9.11147	24.0405	51.0809	44.0893
1552400_a_at	91.535	66.8436	65.6225	51.0797	51.8903	68.4129	39.3716	50.1282	58.8556	49.2358	67.1392	57.7796	85.535	39.3772	81.8348	59.6429	86.0269	62.8954	54.2664	63.5019	36.1352	81.3066	62.4531
1552401_a_at	48.695	48.9067	62.115	47.3704	63.6198	57.4099	62.8254	66.1048	72.3403	89.6631	63.9062	55.4067	28.0178	52.8023	54.981	57.4744	41.26	62.7267	33.3895	32.1739	74.8071	63.5538	31.3807
1552402_at	18.2145	26.8987	40.8138	24.7626	8.14213	37.03	6.57466	17.5301	25.1109	8.89954	27.4577	21.5087	18.7101	6.21272	39.5219	39.6572	7.16268	51.9031	4.23129	10.4903	34.9754	25.3463	4.70099
1552405_at	29.4535	61.4352	39.7191	14.6297	24.1961	27.7795	39.3958	41.5681	33.0437	34.3979	45.8307	34.8994	20.1642	15.4043	66.6226	31.4979	29.4809	6.83504	20.0997	56.374	33.4316	31.2062	29.1708
1552408_at	20.1876	47.838	42.0945	13.4573	23.6429	29.96	18.5824	29.5595	25.8616	23.3353	19.8116	20.075	36.1461	9.59856	20.9113	37.8117	15.5361	33.5047	18.7019	27.2496	14.089	32.6385	26.0727
1552409_a_at	10.2286	73.1224	67.8795	28.1845	22.8727	7.29988	12.7313	36.1512	7.99791	23.0197	8.83352	39.8762	11.1195	16.2408	35.3739	5.32611	50.8653	53.144	44.0068	6.62908	36.2197	27.7686	54.942
1552410_at	23.9766	48.8553	42.9009	36.5926	23.6362	33.9777	26.2404	37.378	26.7415	47.9336	49.7717	40.2119	24.0232	39.7891	44.1869	29.9238	34.2102	43.3091	25.4246	40.7431	48.2349	43.8284	34.0689
1552411_at	37.0553	46.2239	16.5042	12.4884	50.5798	13.4492	18.6556	41.2134	22.5171	26.3687	85.0537	116.191	13.9821	28.0793	16.4772	17.2107	16.9841	51.8939	13.9545	15.1142	69.6848	12.5502	46.6763
1552412_a_at	2.48183	13.032	14.5673	32.2597	26.7483	23.6213	3.48156	1.51412	14.0014	4.85766	23.8137	15.9794	20.1319	4.39985	11.3456	18.6871	15.5504	31.2408	10.8547	2.38287	36.5875	2.58037	24.9849
1552414_at	49.1831	39.5739	58.7125	42.3573	29.5478	48.1366	35.4701	30.6712	37.8568	44.3243	42.0644	24.4483	31.2541	38.1958	42.4715	29.6047	20.007	48.1891	37.5505	52.4951	46.3234	7.01745	41.2385
1552415_a_at	12.7857	35.6572	55.4617	7.65655	29.4761	41.1207	60.706	23.5199	20.0487	68.0466	38.2383	7.86187	30.9029	4.16412	33.5492	13.9563	5.09849	14.2345	40.6486	15.6828	33.6959	19.9908	12.1614
1552417_a_at	431.814	466.979	417.936	549.054	494.284	521.106	459.027	415.243	384.567	501.999	542.718	599.818	524.375	463.132	455.483	559.938	604.479	587.141	463.278	382.887	474.287	615.878	460.291
1552418_at	6.22584	4.44033	7.58974	3.51715	4.0995	3.97143	7.75748	8.55398	8.15228	2.91914	4.44524	7.8211	8.99491	2.7476	6.76687	6.17384	9.43618	8.68687	4.20203	45.3438	3.65716	3.40522	2.53219
1552419_s_at	69.4572	113.449	25.7714	66.2514	43.2896	54.8256	70.4225	78.0537	35.0889	37.2056	84.0428	49.6637	61.9973	64.2784	84.258	57.9543	83.4672	46.1462	78.4103	86.49	72.4927	61.8374	66.9825
1552421_a_at	54.6941	8.85693	38.1888	29.1123	24.5332	52.7431	6.65315	39.5774	18.7413	46.8519	67.5441	51.419	18.8435	44.8448	7.14722	15.7721	76.4554	60.9248	55.4897	12.328	36.319	15.0953	91.2112
1552422_at	5.59264	5.48977	4.69885	10.0297	30.4602	3.67092	2.8899	4.12309	3.46362	20.8431	8.38661	8.89842	3.22006	18.2785	3.8256	6.94763	3.60415	5.05637	6.33297	6.74108	5.11777	3.92455	4.14455
1552423_at	180.917	179.681	177.105	201.996	155.065	160.298	188.663	247.854	254.208	200.946	172.544	155.788	181.372	193.812	200.167	153.435	209.654	169.724	212.5	188.964	232.129	154.216	173.619
1552424_at	7.84876	2.43954	1.773	4.83427	2.14329	3.83251	1.62655	1.70794	1.71583	3.26197	2.90535	3.34989	4.78901	2.6158	2.54808	3.91403	2.48063	13.2009	1.61262	2.45181	2.40452	6.58773	5.2817
1552425_a_at	68.9032	82.3379	37.1881	44.1077	90.1629	50.6312	71.0831	35.7972	55.5047	58.057	48.1307	93.0719	71.5574	61.3424	62.5861	93.6206	36.1339	23.4187	49.4233	74.6882	48.3726	41.4051	29.0849
1552426_a_at	2678.29	2906.78	2676.57	2025.25	2071.19	2627.12	2545.99	2724.97	2639.99	1969.87	1887.32	2143.39	2418.22	2657.57	2790.26	2342.93	2202.21	2391.65	2755.36	2293.61	3074.31	2353.75	2020.93
1552427_at	159.302	140.813	178.292	141.082	166.938	151.118	113.768	161.435	173.544	160.15	159.837	91.9509	220.525	208.5	154.759	175.634	105.334	150.115	187.642	101.476	127.192	161.287	105.261
1552430_at	111.5	80.0129	73.9667	94.2313	89.2508	87.8513	87.8992	71.3516	82.5979	71.1907	76.8996	102.598	74.8103	102.785	66.4648	89.0206	86.5067	100.663	76.2383	71.8307	95.0465	104.5	62.6271
1552432_at	6.37148	26.81	4.37604	12.4543	16.5707	17.9517	7.92163	9.48084	25.8547	10.1101	17.3874	11.9285	6.52152	5.0978	10.4448	11.2422	18.6215	5.41337	10.1571	8.4925	15.6391	11.2402	8.45135
1552436_a_at	4.91817	7.16725	6.28757	6.44087	5.95846	6.28153	5.9542	4.64574	8.23553	8.78751	5.20635	5.58508	4.94486	16.6786	8.95524	9.31417	6.46954	5.25117	10.3855	8.80337	7.65899	4.19311	8.34548
1552438_a_at	25.3573	18.5193	4.28864	23.9151	19.4052	10.6901	18.2798	9.63945	14.1951	12.4153	10.3789	36.9652	7.2094	20.644	12.2825	15.9063	14.6253	24.0066	21.507	16.2577	30.5463	17.0404	8.0344
1552439_s_at	2.14304	4.27414	2.47289	3.03681	2.72069	3.72254	4.02869	3.57583	1.5873	2.2573	8.1987	18.6323	1.11857	3.48637	3.68808	2.45968	5.68114	2.2813	2.71411	3.70335	3.01462	2.22715	19.2402
1552440_at	10.1546	12.6649	20.2229	18.545	6.39927	9.83804	36.7785	12.9859	15.8533	21.4571	38.1213	6.26468	43.5533	10.4943	30.3078	12.0385	29.3063	22.0679	17.1559	23.8845	20.4438	17.4112	2.38797
1552445_a_at	28.6733	24.7977	46.2431	13.1921	30.7631	38.7136	8.84218	2.85	34.0824	31.587	5.82667	26.1112	33.3017	31.8081	42.4156	22.9252	29.2225	15.6382	27.6048	8.10297	18.1297	13.8872	6.22162
1552448_a_at	1.40662	8.14035	3.04724	25.1515	5.76987	6.49808	3.63598	22.8899	5.7865	15.8203	26.8476	3.95379	29.3933	26.4064	3.79008	7.16166	4.73128	6.95253	3.50259	8.40084	8.88611	2.44655	5.84068
1552449_a_at	5.71344	4.87245	0.991458	3.38652	6.22891	6.47369	16.183	12.5781	3.73884	5.62131	14.7833	2.58558	3.83029	38.2196	5.51622	4.10882	3.41469	3.54379	5.26889	32.4997	3.01954	1.49569	15.9417
1552450_a_at	22.5914	7.83806	8.55783	27.1714	4.9686	9.41522	3.693	4.87713	23.6152	7.55526	5.2931	12.6174	17.7157	6.048	10.4616	21.0492	56.9173	9.44784	5.15069	17.1643	28.9041	49.1042	38.1719
1552452_at	9.30812	18.447	40.4126	24.8294	4.8729	19.0053	5.83582	7.00891	28.9503	75.0804	38.4199	50.0677	24.0767	21.3324	10.4655	33.5807	50.7955	31.0746	30.391	4.67374	11.2379	49.2152	36.8095
1552453_a_at	10.3044	6.89807	11.4065	5.63798	4.74533	7.1088	5.22443	6.31735	7.65028	8.74165	9.37663	7.74007	8.98775	7.43428	9.89199	7.26725	6.73246	8.79785	9.6306	8.29967	9.25001	9.53245	7.87674
1552455_at	29.8264	79.4781	52.1758	5.18677	38.7036	28.0379	47.4445	37.6533	78.3773	30.4659	39.0031	76.1734	45.1422	41.8605	33.5171	36.4433	48.0249	37.9716	75.9754	49.7681	44.4448	56.1069	43.1068
1552456_a_at	61.0313	40.2774	42.4806	35.7027	42.9366	18.0001	7.08609	45.3589	49.8216	37.7423	31.1043	33.7544	66.7588	19.7046	48.7167	49.7296	24.6871	41.081	40.985	43.2713	10.9547	29.6257	71.9593
1552457_a_at	16.7158	11.2377	17.7268	7.54211	16.8279	17.0577	35.8014	22.3857	13.4911	11.0429	25.2591	6.27548	21.2444	13.7018	14.4462	24.0265	7.66547	26.1798	29.0722	22.0317	11.8577	25.5164	14.9091
1552458_at	35.6368	33.8496	47.5233	26.6225	36.6855	20.2631	21.9256	37.5533	9.01127	39.8937	39.7623	58.8771	47.9771	23.7956	59.9946	31.3258	25.6697	34.9705	35.0362	35.171	30.2379	24.6308	21.1739
1552459_a_at	6.397	7.90386	12.4012	3.91597	7.70328	2.49478	7.02324	6.16069	3.99006	5.59251	1.84753	7.63892	2.67533	6.59616	17.1471	2.12108	5.50523	3.97201	7.0436	3.60809	10.1267	6.42424	7.6616
1552461_at	25.4546	3.93125	1.88012	3.9633	23.9431	25.3755	3.99335	13.2505	41.9334	6.24604	13.3717	14.1094	33.6484	4.35281	19.9329	12.0463	27.6292	18.9469	6.55261	1.78669	2.37615	12.747	4.98704
1552463_at	33.5705	33.0006	38.6706	40.983	33.7179	41.802	30.1655	54.8665	29.704	47.2765	31.3602	55.4609	22.1179	34.6709	35.7329	49.9156	35.9175	49.6656	34.1004	19.1854	36.4707	25.2508	35.4648
1552466_x_at	26.685	2.24595	4.44641	11.1988	1.29539	14.6323	1.78691	26.7191	4.48288	17.4588	24.3708	26.7057	11.5501	2.63282	5.42583	7.26975	1.33237	3.67815	7.49401	15.2861	10.3712	3.33416	18.6872
1552467_at	21.4404	87.6234	53.8403	63.7383	138.728	31.9619	25.1505	126.356	71.083	75.435	44.5822	79.0529	37.6248	17.1324	71.3099	20.9105	74.1132	35.1107	49.9148	83.9904	33.9434	70.2391	105.474
1552468_a_at	53.5948	19.2584	31.8519	31.0522	15.1993	11.3057	13.4228	23.3808	58.0611	30.3651	25.3053	28.9554	16.7324	2.8743	27.3281	23.283	40.0882	14.3061	13.0129	15.5212	60.8569	12.3233	14.5327
1552470_a_at	87.6784	72.0011	110.677	101.305	101.131	99.1065	73.2759	79.7388	78.0276	77.901	79.8148	91.853	105.475	137.863	144.754	143.715	171.473	147.069	118.548	130.325	93.425	149.139	124.572
1552472_a_at	358.524	384.254	302.814	336.636	321.828	337.96	420.985	328.795	416.211	373.388	366.783	374.828	467.782	436.762	432.671	354.214	358.479	375.944	525.445	512.343	522.073	391.859	333.354
1552473_at	96.8498	176.367	115.772	206.934	347.57	277.211	203.007	294.161	355.162	134.383	127.077	187.472	109.426	64.0245	146.934	154.317	237.654	268.469	215.272	183.723	225.322	227.388	226.361
1552474_a_at	105.561	77.8883	98.5436	85.0231	63.9053	149.728	110.091	140.199	79.6188	78.1252	36.6906	109.073	94.1732	27.5743	105.102	119.192	107.241	99.9546	97.0214	93.439	95.4897	130.391	131.391
1552476_s_at	11.2717	86.5553	79.1417	20.3902	20.4535	11.0493	10.8975	53.7684	8.64165	33.0689	42.9277	12.6279	11.7502	36.7566	44.4384	50.8794	42.3901	10.026	39.548	89.5619	55.6763	83.7793	71.7925
1552477_a_at	1322.94	1407.17	1537.17	1335.45	1423.26	1166.9	1587.4	1856.76	1529.57	1138.44	1164.21	1124.15	1940.55	2084.32	2005.82	1684.68	1631.65	1502.94	2927.21	2871.19	3058.61	2875.71	3275.99
1552478_a_at	280.395	209.84	302.945	252.863	217.36	262.943	360.567	306.226	287.486	225.156	171.148	171.94	401.742	203.02	148.803	279.087	249.263	219.539	435.359	298.752	367.4	337.655	430.165
1552480_s_at	0.979344	2.47017	13.204	3.38856	5.37187	4.8881	0.817075	0.374554	9.47514	10.9078	0.556069	2.91967	3.06793	10.2075	0.290053	8.63254	2.87151	1.89748	1.4341	1.29173	6.16743	17.297	1.04359
1552481_s_at	65.7045	53.2412	70.5265	66.7556	64.808	57.0861	63.7294	54.3068	65.4631	59.5753	57.4074	65.0858	99.9467	80.7446	107.071	74.6061	70.9205	48.445	76.2167	48.2873	65.0343	84.105	54.2305
1552482_at	139.688	113.462	143.114	69.1729	70.4298	59.2061	63.9746	56.1942	159.275	75.4252	88.6402	107.979	135.682	159.998	142.688	88.4595	65.8203	107.13	163.658	196.377	137.606	100.981	131.645
1552484_at	6.99052	11.1054	4.76609	10.7836	8.19839	8.8849	9.14073	7.53482	7.98698	10.5279	26.298	13.8824	7.22811	4.16398	65.5701	6.10511	19.6033	10.1968	3.95051	4.94397	4.97253	6.34287	7.64859
1552485_at	517.959	494.967	569.313	521.641	524.96	495.92	535.752	569.877	451.158	462.444	454.998	443.119	649.786	585.313	663.918	523.725	480.071	525.472	631.602	660.553	652.22	719.711	625.221
1552486_s_at	537.944	729.782	602.173	476.033	470.931	445.322	561.845	589.069	614.13	486.946	422.314	421.992	713.135	683.675	627.725	548.754	596.895	574.73	734.287	798.448	668.156	736.547	708.262
1552487_a_at	4133.27	4327.99	3708.63	3399.99	3407.53	3453.15	4376.37	3647.28	3850.02	5492.55	5180.55	5160.2	3181.63	3565.76	3384.26	2856.63	2756.72	2533.01	3280.72	3251.34	3176.77	2981.81	2704.66
1552489_s_at	12.5383	23.7567	47.0261	7.36381	7.47049	2.11328	1.77772	2.46354	31.6094	1.97537	18.5428	26.8615	25.9118	2.1075	25.7183	22.332	9.44653	17.8093	28.2813	2.61242	6.42283	30.4984	35.1651
1552490_at	105.207	82.3813	94.4046	72.0649	84.2295	100.911	93.7036	59.5703	87.3369	80.3296	44.1273	80.058	50.2676	54.5598	105.397	86.5767	98.095	56.878	107.946	114.141	51.1037	85.8449	112.486
1552491_at	35.8291	9.00284	17.9173	9.36773	17.5352	26.7893	35.1594	14.3429	6.14142	31.1353	39.0845	31.4141	24.9999	42.758	26.0975	14.8671	3.77903	6.34751	36.1871	30.023	32.9703	22.1113	2.72762
1552493_s_at	3.53914	11.3767	12.192	10.5837	10.84	15.6515	3.5158	14.1393	6.32207	10.904	6.61068	8.6669	11.9356	41.9545	12.336	5.05861	7.8919	7.40625	43.3892	9.23181	10.5457	23.5045	9.14143
1552494_at	9.02346	17.9258	15.639	4.44768	28.4547	36.9481	12.5161	16.963	10.272	29.4341	16.7057	7.02642	7.80561	13.5411	23.2744	38.8044	19.8384	9.68516	8.31103	8.49891	2.49944	42.8384	32.3901
1552496_a_at	256.329	247.121	236.063	151.151	128.09	157.397	337.527	326.311	353.206	145.118	140.406	89.1672	294.597	231.545	306.139	163.767	172.14	184.066	397.892	409.011	367.574	168.842	157.922
1552497_a_at	45.5751	24.7708	33.4368	5.85775	26.0537	5.20266	19.1883	36.4144	26.1557	25.1225	46.2263	60.1282	3.44357	25.5091	22.9498	7.59221	38.4468	28.1046	22.0109	3.19365	20.9439	33.7269	33.716
1552498_at	33.3456	24.2802	13.2388	21.7115	31.5057	6.99509	31.8427	3.78441	45.2544	13.7222	31.7639	38.0684	41.6701	44.5595	34.5388	9.3924	40.1239	42.9918	60.6167	53.1632	61.101	11.4026	13.5011
1552499_a_at	61.1186	55.8124	36.2516	70.2498	57.5799	49.829	62.3386	57.2815	52.0452	40.5501	42.2663	41.7983	68.7763	81.6244	45.0085	41.4251	17.3924	66.9418	52.6297	36.3713	75.9487	55.3716	50.3572
1552501_a_at	8.43034	30.8819	12.4228	8.02501	11.6879	9.59819	29.65	9.18471	40.6163	7.58004	11.7566	11.1037	12.4542	22.6424	10.9171	6.32753	8.04997	40.8437	9.35328	7.31839	34.4319	10.3905	13.9987
1552502_s_at	49.6168	77.7974	55.2774	72.8784	94.43	89.6588	48.0081	51.2045	43.3873	80.8295	108.561	87.5731	66.0733	48.6277	57.5917	82.0928	95.3108	81.0363	48.7217	50.2792	53.3958	113.251	122.064
1552503_at	10.1407	7.03351	30.3137	33.5064	54.4518	12.9564	5.22333	41.3074	8.99699	13.0677	11.7006	10.1713	10.9214	14.9492	6.81601	10.1394	11.5997	30.477	11.507	4.51498	30.2356	25.0324	9.17149
1552504_a_at	40.9122	39.6882	16.5085	35.5777	29.4136	46.8796	46.8041	36.9327	34.2635	20.0167	82.951	49.1757	7.27878	53.4231	61.9385	11.3447	60.3977	42.3696	41.5233	31.1204	13.4251	55.7537	28.4521
1552506_at	2.61466	2.55896	2.64697	4.70149	9.00981	17.5156	30.9704	16.6388	2.58972	12.4985	5.37572	5.28694	2.42012	10.5015	5.40767	12.9822	4.12531	6.05212	4.92772	27.591	10.4225	23.7072	9.85409
1552507_at	52.3904	35.1595	53.247	30.5027	50.4441	33.9833	39.0099	45.4622	30.8717	77.5815	22.6014	10.92	44.9927	51.3741	56.5663	34.7219	67.7386	60.1545	46.4044	46.0206	50.6645	35.5551	25.7599
1552508_at	26.3007	18.4999	20.6934	33.4451	9.66389	38.5846	50.2334	39.9338	35.3482	69.4468	16.1662	59.847	55.98	7.94395	26.1334	41.4413	5.80738	9.09565	6.2969	34.5965	37.8308	5.87999	28.3747
1552509_a_at	8.73794	26.3452	9.8188	26.921	31.0846	36.473	20.7884	51.8108	18.8734	18.0692	39.9821	24.7283	34.1352	1.83739	27.8988	17.3625	23.1315	39.1499	15.9863	26.8365	17.6192	17.6971	28.5559
1552510_at	180.169	403.316	210.494	177.21	320.655	233.439	213.804	151.086	229.776	254.072	254.872	448.699	171.17	186.609	248.035	157.642	217.74	515.688	274.595	175.699	365.097	263.716	377.497
1552511_a_at	7.55382	14.1251	2.03905	2.74821	13.1276	18.2157	21.9775	2.2491	1.2865	16.3113	9.13949	4.88267	2.87558	3.16684	5.40447	9.46335	13.5526	27.9339	8.89372	1.26978	14.4296	5.48524	2.11005
1552514_at	24.8107	20.0685	31.2163	51.0036	15.2047	41.148	27.7813	36.7968	9.55346	43.55	18.6638	30.6901	32.2279	34.8228	27.2321	66.5695	12.4871	30.4611	30.9421	29.3771	21.0189	39.3686	31.3726
1552515_at	73.0326	111.106	72.1274	70.1261	42.9814	89.8562	66.4341	92.8116	56.0666	35.9841	43.1642	79.4202	94.1364	61.2297	102.706	75.3834	60.824	79.4223	31.7546	57.303	60.6747	65.1384	69.346
1552516_a_at	37.0449	28.1584	19.816	5.56642	5.3889	7.74257	39.5094	25.9525	5.80557	26.3468	26.5139	6.9784	21.0896	10.1484	20.6762	28.7744	7.44128	12.4796	6.89872	24.0045	9.13164	9.4175	5.74359
1552518_s_at	139.497	149.766	145.191	92.7857	125.491	206.962	79.6128	119.665	163.449	180.891	128.674	132.002	80.6192	81.198	100.015	114.466	94.5288	116.757	141.737	82.7445	89.1806	139.529	90.3089
1552519_at	52.7754	25.6382	28.735	60.1573	52.2551	71.1048	20.8375	35.9038	38.7006	73.0306	35.4477	57.4935	45.4804	40.2607	43.753	54.9974	62.6263	71.6717	26.6572	35.3425	44.9714	91.0482	68.5854
1552520_at	83.2047	129.022	92.4039	89.2255	89.7808	56.0098	127.435	114.019	124.796	34.1119	46.2462	53.7728	97.1001	146.442	144.554	101.721	51.0761	51.4015	81.7779	57.6851	107.3	77.8766	104.34
1552521_a_at	90.5832	107.895	108.719	98.2037	84.6714	81.5404	91.2997	83.5816	123.246	52.8814	87.2056	55.6045	105.897	99.0559	94.3295	76.7162	88.2092	65.7787	90.6434	118.18	92.8893	89.8508	86.8211
1552522_at	30.4934	8.63557	21.5537	4.62673	5.6084	2.42339	8.8382	16.2338	5.39297	1.54664	14.2638	21.1201	21.639	14.1604	9.45259	2.37241	12.7637	11.982	1.09727	9.87901	1.60568	3.95724	29.6322
1552523_a_at	22.6814	24.5187	37.7715	32.906	10.9221	17.6376	27.239	37.9825	28.7553	28.2333	28.6456	28.7596	39.9698	26.7037	13.6398	26.6575	17.876	44.7753	36.9515	39.124	35.9226	11.0784	20.73
1552524_at	4.53902	22.1092	5.43054	10.4021	9.80695	50.9955	4.69931	6.4726	7.61991	11.6993	6.3399	6.05387	13.1993	3.96255	8.59596	17.5348	6.39115	21.0572	9.28492	20.4094	22.1045	34.7057	6.22984
1552526_at	31.2387	7.64368	34.6069	3.30026	5.37691	11.1665	8.14282	9.2312	6.03511	8.23639	6.19652	7.98919	4.30987	5.79193	40.5255	5.77365	7.16126	15.4843	9.92042	8.28005	7.19996	7.42697	20.2029
1552528_at	12.026	11.087	23.9152	4.40326	103.275	15.072	14.278	12.3917	48.3139	20.9166	11.7912	23.5416	8.76806	26.2992	19.0899	9.62571	22.7339	7.51274	46.2283	19.7694	51.9665	36.7747	75.2664
1552531_a_at	19.573	54.2582	53.5695	50.0468	68.3655	61.0742	45.3011	37.2865	50.7878	56.0032	55.8923	68.3047	57.7248	33.8736	53.6588	64.9217	65.55	22.5632	48.3015	34.5613	35.7502	62.1426	46.6221
1552532_a_at	57.3472	52.3807	81.3865	35.9356	29.5274	24.2009	70.1691	53.1112	57.5554	6.35033	9.22718	1.58279	36.5662	45.1433	45.3684	53.0397	51.6934	56.3904	90.7234	75.3344	81.1854	168.119	132.749
1552535_at	35.6455	40.5753	37.6583	39.1969	25.3376	43.6915	28.8214	7.69078	40.0325	51.4612	46.1142	54.1705	25.2833	24.4038	68.3494	11.8572	37.4158	12.0484	6.50612	70.1562	6.30675	23.1987	14.0895
1552536_at	128.242	109.013	120.743	101.864	113.289	99.4119	114.104	109.309	115.51	84.1453	87.6209	89.0784	107.064	110.24	93.0233	78.2709	103.098	85.4113	124.409	135.347	57.6939	117.502	101.938
1552538_a_at	4.98049	4.69864	14.0316	8.96264	36.9069	15.0316	3.84269	32.2559	21.119	6.17541	16.4321	31.0753	32.106	4.82292	4.34658	4.12768	6.09902	14.1934	23.5532	2.43156	5.72606	31.0055	44.1931
1552540_s_at	88.9589	118.673	132.553	71.7986	119.124	96.35	87.4675	93.7789	84.627	124.408	97.6487	66.2546	81.8916	127.69	137.599	83.7468	105.699	77.4779	150.368	116.761	101.534	152.044	129.077
1552541_at	20.0567	22.3991	27.6818	18.3698	71.0476	13.2002	22.424	24.169	17.9318	74.1371	45.5701	22.0519	17.5883	17.1097	20.8697	19.7123	38.3555	20.5507	28.9577	16.0288	22.123	17.8143	37.9724
1552542_s_at	4.15186	20.0241	26.7924	16.5075	33.0515	14.9106	5.34284	29.5649	27.2003	33.0247	39.0525	28.7447	5.64149	31.1198	16.7899	38.5531	23.5785	10.2605	31.1658	33.4877	21.4685	21.764	25.3239
1552543_a_at	73.7358	67.7097	50.9829	33.6874	36.0939	32.0425	58.6706	20.6531	49.5259	48.6535	20.5486	3.05969	51.9124	75.0668	66.5605	37.3529	68.9024	66.7256	40.868	62.1829	69.4674	49.1963	51.7386
1552544_at	39.5108	53.3557	45.0235	11.3079	7.55654	31.5107	29.8282	35.2488	9.01024	37.7144	6.66932	35.6072	32.6425	18.9976	40.3864	7.00109	7.29279	56.6063	26.2842	37.249	32.6602	10.3921	2.6835
1552546_a_at	384.36	442.83	488.118	516.514	487.317	497.86	380.06	398.06	390.666	779.854	759.707	703.913	577.132	491.83	593.5	583.547	597.795	589.583	555.094	487.794	580.259	741.484	725.784
1552548_at	2.58277	19.8501	8.65073	10.3893	16.1181	16.2043	26.4195	6.82398	6.86241	5.17057	18.8492	16.9275	25.6133	17.9809	25.4878	17.8414	12.5307	28.6793	30.3621	4.74396	9.43635	9.71849	43.9109
1552549_a_at	41.7641	26.1415	18.7216	39.5941	38.9179	17.4861	56.1132	62.5742	33.8059	13.1241	65.612	25.6089	43.5011	36.8327	17.1882	33.0994	24.6931	19.359	14.8394	30.0477	34.7067	16.7277	32.2501
1552552_s_at	16.8256	27.9267	57.431	20.7605	44.6139	47.6559	37.2768	27.7979	38.5251	27.9237	43.3357	48.2938	25.7869	40.2178	12.658	27.7696	35.2778	42.0385	36.5715	50.8022	47.0584	51.0528	37.7393
1552553_a_at	7.29731	9.50491	8.39538	44.445	30.8762	3.48683	19.2832	9.94513	1.5211	9.63557	7.9422	8.9819	4.07611	5.78551	19.0604	7.80825	20.477	43.2572	17.8538	8.95705	7.50788	14.9267	23.397
1552554_a_at	1.24798	24.9043	6.66208	26.8193	5.50811	8.36714	20.0869	26.7825	16.0534	27.0274	10.9233	16.3314	31.9561	25.7678	9.79161	36.4406	19.6901	3.08043	31.3166	28.9237	13.7927	11.9186	51.1361
1552555_at	4.54789	31.4254	2.69846	55.969	73.7872	3.27394	54.9125	54.2993	42.282	50.4697	73.593	37.0106	25.5574	28.5118	59.0987	33.2946	33.7441	61.0698	22.6046	16.2429	26.3773	49.6872	44.5595
1552557_a_at	15.2641	9.3029	27.4885	29.6563	45.8977	21.5669	26.7369	32.7589	8.94204	12.2051	27.8517	36.815	21.3	23.2595	26.3493	12.2257	8.37314	4.16293	19.5498	28.8902	2.90082	8.02111	28.8706
1552558_a_at	56.6725	62.021	5.33934	10.7975	43.3672	72.7486	54.1039	3.76453	71.577	44.5919	59.2311	14.9238	43.6426	52.3385	67.9036	44.9607	43.7352	71.9664	31.6804	34.5861	24.9382	56.9223	50.1502
1552559_a_at	7.45792	4.72294	9.93665	5.93601	5.59762	8.22253	6.25209	10.3047	3.58464	7.67991	7.86555	10.862	7.91619	2.93902	7.71386	8.64188	4.47861	8.35719	6.88639	6.30649	10.6054	3.28135	2.57302
1552562_at	32.1883	15.2984	27.3845	16.8389	15.3033	32.5335	18.2932	2.45829	14.1953	17.2346	3.54076	17.2538	25.0788	17.6328	4.91998	40.6899	25.716	4.57907	11.6163	2.83475	7.56982	4.15988	18.7949
1552563_a_at	142.199	110.219	133.267	152.262	107.089	155.671	100.39	124.44	95.7554	137.982	123.723	110.519	108.014	94.3364	98.0867	131.758	123.818	100.415	132.212	119.212	139.817	104.75	106.958
1552564_at	24.0769	7.11714	34.3208	13.0354	4.40632	4.44793	4.07132	27.912	6.75484	34.9216	5.62326	4.26917	4.09046	4.64844	3.8914	6.05934	3.05889	39.5903	14.1224	2.92684	26.9214	18.5233	5.29875
1552566_at	4.21291	1.99696	9.77794	1.90519	1.78553	2.02038	1.48804	1.42888	1.29496	6.08656	1.3805	3.94712	4.37552	1.62566	1.65929	1.83128	2.1911	1.87739	2.10501	4.33799	1.44237	1.78953	2.00215
1552568_at	5.90766	4.41618	6.35956	8.95409	5.16804	2.52058	17.9512	5.49651	2.73174	2.15404	3.44101	11.0746	9.09664	2.35096	16.0074	11.4482	3.08067	7.8878	38.1385	11.3242	4.98325	32.7755	1.82624
1552569_a_at	32.4923	61.8401	66.1019	17.432	8.84419	12.3664	26.5558	49.0291	26.1232	23.4465	67.6632	10.1662	41.6927	52.3264	60.1718	20.4132	34.116	43.7099	41.1503	11.7208	9.92177	57.7703	37.67
1552570_at	21.7241	39.2455	26.4789	17.1734	12.3189	26.835	16.4896	12.0587	4.34109	25.0045	17.4203	10.5798	9.01393	39.4531	9.47046	9.06456	8.49364	8.09635	38.8229	10.5877	50.9619	8.72963	15.4382
1552572_a_at	73.9201	69.0323	65.8086	93.2995	80.0919	97.3945	44.214	28.2567	57.608	131.826	106.439	134.39	69.1737	42.3693	58.2641	141.819	78.7202	59.9984	55.9357	46.0682	58.0154	61.7476	72.8129
1552573_s_at	50.5085	66.3325	83.3604	74.8812	83.8817	98.5102	78.1966	50.311	55.9623	98.7695	142.51	134.048	75.7091	121.364	62.9867	145.275	105.705	69.28	60.9058	65.2478	78.5421	108.131	107.525
1552575_a_at	415.152	362.002	394.905	319.56	354.884	374.28	315.372	354.709	288.395	252.363	240.67	227.71	408.757	446.604	427.878	300.638	299.792	287.903	611.04	499.934	461.802	303.66	307.456
1552576_at	19.6374	35.3383	30.0708	55.6221	57.1367	26.8583	37.849	32.8946	45.3044	40.4486	54.7038	42.1957	40.5703	56.9324	62.3329	14.6487	44.2708	45.7696	71.4742	11.5713	43.8927	25.8909	43.9916
1552578_a_at	13.4674	14.5991	7.46427	14.0304	12.818	2.0737	11.4065	28.1307	2.10509	22.2154	3.24347	12.869	1.27369	12.5189	16.5195	15.4396	16.4291	6.43041	2.58431	9.7822	5.92311	13.2053	1.03823
1552579_a_at	149.596	133.303	154.459	180.524	160.892	177.736	95.8353	135.351	106.514	94.4631	143.268	98.7377	150.868	133.205	133.634	219.941	195.254	188.438	149.639	140.848	114.577	171.618	185.896
1552580_at	53.3912	67.8172	72.4478	94.6331	74.8308	42.8271	58.1496	79.183	57.8318	42.2237	40.4358	49.3003	139.818	137.036	90.0614	116.44	101.592	123.435	125.627	110.069	126.685	167.129	187.009
1552582_at	23.4182	21.0954	31.8246	23.276	18.1915	32.6903	24.3072	11.6259	11.7299	20.3938	5.78727	7.33919	1.06029	15.2483	18.1214	16.3544	20.6939	38.2702	29.2169	31.9066	11.8098	20.7683	22.1482
1552583_s_at	35.2161	27.7223	32.7009	9.95511	21.143	20.7999	28.0929	20.7534	25.906	21.768	35.2641	27.1497	20.401	2.22215	4.29887	22.2167	23.1144	25.1241	5.21164	20.6111	6.64953	21.7129	17.6287
1552584_at	3.99017	29.8833	33.169	45.3026	40.6683	20.6746	7.08732	15.9708	39.8934	4.67301	34.887	46.9278	54.7377	5.0304	6.57675	5.62092	5.71518	11.7584	7.07125	6.93874	7.18242	8.41026	5.70368
1552585_s_at	30.4834	44.6237	35.6748	15.7687	30.5913	32.2043	34.5621	33.3107	23.618	48.3657	20.0839	20.4484	8.97272	30.3383	40.6608	28.138	36.3617	6.62067	49.5877	36.2637	24.0431	24.739	42.234
1552586_at	14.9087	7.26327	32.5754	12.1032	15.9793	48.1832	24.1325	6.35167	16.7594	28.0984	31.5227	14.2359	18.0734	28.1395	48.7692	27.8291	15.9182	54.9197	48.3667	10.3484	15.4475	31.9555	16.8083
1552587_at	1.00402	23.7168	20.7217	17.4212	3.8669	2.69624	5.57045	9.93048	21.0253	26.0104	1.68724	9.24056	27.605	8.69443	11.8543	3.1592	2.42885	5.99919	1.78323	9.63811	3.477	7.57288	2.99042
1552588_a_at	17.0388	19.5845	27.9328	11.0509	6.41578	24.453	12.8434	22.704	33.9079	8.609	9.99579	9.62085	2.43825	13.5659	36.4184	34.0147	23.8812	10.2686	6.60457	3.80743	19.9992	25.0977	8.2183
1552590_a_at	27.2068	42.4647	4.48853	30.8975	29.9361	38.0827	3.64059	46.828	35.3719	2.79804	37.313	28.3522	48.256	13.4718	25.108	34.0437	28.7817	7.96146	3.08831	27.2275	14.4958	31.4974	5.78254
1552592_at	14.2765	38.8856	19.3062	1.18337	28.1355	8.63458	13.0141	3.43351	7.22203	8.32327	11.0431	23.525	2.26941	4.21992	15.7104	8.98553	3.86636	14.3571	7.09017	1.7905	8.71929	13.3088	1.58162
1552594_at	8.15838	10.6604	6.19199	11.5252	10.9728	3.63896	6.60038	7.8956	20.3958	9.42219	4.36928	8.38558	5.59374	3.37158	18.9931	5.4475	7.14375	18.0499	33.4571	8.1266	9.55107	5.52521	13.5274
1552596_at	15.9559	6.9255	13.896	16.1315	10.6692	9.93995	4.9826	8.04787	8.40987	7.63292	4.71535	10.3705	13.4734	4.72095	13.513	10.0671	12.1767	6.51724	7.41992	8.64864	15.2172	6.65463	24.9144
1552598_at	57.261	92.8851	73.5838	62.6805	71.7177	63.4981	42.1448	45.1832	47.4329	56.8261	73.8047	48.8997	55.4372	86.243	74.5134	80.1668	76.4172	35.7055	33.7731	33.3837	53.3275	65.764	64.8158
1552599_at	5.99627	44.9368	18.8854	4.71633	25.8621	47.1041	4.66079	27.325	19.383	6.66839	22.14	31.8095	45.4782	56.3368	26.0969	3.73441	37.0546	13.3304	29.5199	23.4872	30.6728	29.0483	5.198
1552602_at	110.829	140.252	66.5718	84.478	79.5434	64.9749	79.4434	96.0157	72.5298	138.053	124.463	106.761	126.372	80.8525	102.662	78.3864	92.7034	87.1332	98.9596	63.1469	136.444	93.2602	62.6685
1552604_at	3.05062	6.64193	2.40598	8.96753	18.1216	5.80205	2.58475	17.8335	3.92148	6.52548	2.81424	5.97988	2.91331	11.5963	30.8083	2.68344	23.0626	25.6085	4.57872	7.32069	5.32988	2.02035	2.99678
1552605_s_at	56.4052	49.6729	28.4895	57.7877	52.9315	37.8107	47.0085	44.6942	34.1529	35.9614	33.4946	44.1858	35.6125	27.0486	50.7726	21.0255	31.7544	55.6137	39.7316	27.5199	16.3059	32.0603	47.1616
1552607_at	17.3334	47.2021	46.9807	32.0595	19.1101	47.0622	37.282	34.9392	38.6944	51.3899	49.8392	46.2276	24.6575	38.8321	49.1728	22.24	48.3784	71.5356	37.4041	53.5193	38.3644	32.9749	41.9183
1552608_at	5.38373	6.48633	25.9527	32.684	44.0024	57.0756	39.4599	37.7522	9.32644	32.8071	38.1549	8.26997	7.30216	24.9945	5.4219	38.8647	52.4322	9.00541	59.4884	32.6684	23.5756	53.2979	51.9729
1552609_s_at	24.296	55.7683	33.344	31.1203	30.5119	39.4877	21.8374	21.2068	32.3232	37.9771	19.936	46.3111	14.563	33.4733	19.7643	40.3854	15.9586	26.8641	34.2031	59.3018	20.3428	14.0932	23.6883
1552610_a_at	548.829	582.817	687.155	545.903	547.492	592.925	632.707	646.821	608.928	459.437	573.228	426.054	627.757	636.293	585.403	496.419	526.832	528.713	634.718	428.065	637.496	701.134	685.979
1552611_a_at	1844.05	1354.1	1658.88	1712.26	1394.56	1426.78	1661.15	1511	1511.62	1396.49	1472.7	1066.99	2050.83	1535.41	1527.51	1647.26	1611.15	1679.07	1738.67	1727.03	1552.82	1855.38	1844.45
1552612_at	275.55	293.368	269.605	300.621	328.184	335.091	248.873	329.447	300.13	249.394	217.078	252.172	243.066	195.776	165.04	241.31	271.529	268.48	232.386	241.182	241.205	312.455	340.146
1552613_s_at	491.124	477.714	496.183	546.268	493.48	503.02	470.07	402.593	317.381	340.672	402.152	345.596	410.442	401.586	350.458	458.186	439.826	411.981	366.138	324.363	374.831	432.655	474.639
1552615_at	76.652	141.246	122.249	44.8077	68.3627	41.2244	85.42	129.602	94.1619	28.9074	83.2909	153.918	108.108	62.7749	82.7702	101.289	42.3896	76.8962	85.9889	60.9953	60.3093	38.0518	25.6313
1552616_a_at	28.2135	15.6637	29.7099	27.6679	14.8374	37.7286	10.1006	30.0784	26.3545	10.7244	10.2564	25.4288	34.3713	40.3807	45.8534	6.61	12.987	44.3969	5.96817	11.0465	63.3151	49.6644	83.8398
1552617_a_at	1232.23	1295.15	1131.5	1268.75	1184.98	1135.51	1107.88	1189.61	1056.95	981.138	1161.28	953.009	1302.43	1269.03	1261.26	1258.72	1235.11	1121.27	1387.24	1288.23	1240.33	1318.25	1312.72
1552618_at	363.51	382.396	407.472	432.184	504.22	427.134	368.773	352.906	387.96	495.882	441.429	404.378	421.913	275.82	401.836	461.394	402.229	526.076	383.497	395.208	380.315	395.237	521.724
1552619_a_at	2718.1	3286.77	2760.23	3237.87	3326.1	3215.64	2471.62	2511.08	2384.67	2915.97	3017.3	3062.97	2976.1	2915.51	2772.96	3703.27	3445.8	3606.23	2721.42	2415.02	2779.47	3384.85	3598.77
1552620_at	126.547	109.868	105.832	78.0386	170.803	74.1047	100.566	83.6365	83.6751	142.329	39.4284	44.7358	116.046	58.6247	186.047	87.3071	152.041	223.811	107.198	112.341	181.131	144.107	158.145
1552621_at	2451.54	1835.17	2376.55	2190.63	2444.45	2319.56	2168.15	2352.04	2192.65	1976.94	1900.6	2039.69	2037.39	2263.89	2210.64	2357.87	2318.84	2142.69	2198.96	1997.39	2006.39	2367.8	2088.27
1552622_s_at	1528.39	1286.68	1513.78	1383.5	1289.76	1161.75	1458.01	1501.22	1372.57	1352.56	1230.62	1391.12	1212.31	1392.67	1186.43	1358.64	1405.29	1404.51	1391.84	1381.15	1332.8	1209.79	1251.31
1552623_at	59.6096	70.846	49.5507	52.1421	113.391	61.7371	32.5107	56.7366	50.6506	71.3933	56.1718	62.4144	74.5932	83.3966	57.2425	131.04	108.776	117.526	52.8504	59.3314	85.7426	90.0721	130.923
1552625_a_at	810.266	683.575	769.127	691.338	779.389	669.537	709.259	714.713	730.228	697.42	677.694	593.731	846.654	760.198	726.516	815.43	728.861	812.847	657.597	643.675	678.814	770.048	757.461
1552626_a_at	4.37315	3.03882	15.4831	3.61255	1.57791	5.63421	33.944	14.2484	6.03431	5.09396	2.51527	23.7373	1.98645	5.01099	3.11153	2.34558	5.26324	5.11094	4.57001	5.62431	3.07129	1.92013	6.23592
1552627_a_at	547.725	392.012	443.642	380.912	412.934	384.79	540.488	466.35	483.294	351.021	359.51	336.491	504.836	512.744	367.892	433.958	419.479	372.097	575.803	328.583	531.685	419.116	317.638
1552628_a_at	1734.04	1811.51	1681.17	1658.3	1711.72	1597.64	1804.1	1668.28	1525.52	1832.85	1664.73	1603.19	1959.75	2117.42	1816.4	1748.02	1639.56	1495.83	2076.43	1913.15	2018.47	1879.82	1509.56
1552629_a_at	26.945	37.5764	9.67283	27.1508	12.2352	2.91754	25.9131	4.43442	9.85385	31.7752	2.86383	48.6578	18.4806	34.3982	3.62886	12.5124	26.7182	58.1235	1.69954	15.6769	29.6097	21.1207	16.9645
1552630_a_at	118.612	127.732	94.5678	121.273	125.935	139.582	114.748	67.7467	144.934	139.244	113.948	112.037	164.29	113.125	102.218	113.414	81.5232	106.448	92.666	118.862	142.68	102.468	85.5755
1552631_a_at	105.582	112.877	172.111	160.641	158.191	150.199	144.197	98.7926	127.489	131.266	118.211	110.274	135.843	128.79	106.09	115.149	87.8815	150.912	103.437	162.751	119.354	111.73	126.041
1552632_a_at	91.452	66.5209	71.5071	63.5425	55.4925	51.3392	85.6175	60.1233	90.5157	45.2243	41.7825	63.9385	72.8335	67.5136	53.6458	55.0857	51.6114	86.6724	84.9311	50.1854	82.1837	56.085	56.4415
1552633_at	279.638	292.112	279.202	200.245	242.383	148.902	229.464	279.53	198.951	231.511	165.982	140.904	269.904	273.82	251.271	191.958	154.576	170.52	295.307	321.372	268.66	188.883	178.347
1552634_a_at	206.103	189.032	198.59	154.523	178.559	149.424	188.53	176.142	145.242	190.486	166.29	121.245	201.163	215.714	259.692	162.458	162.535	119.69	213.534	185.408	176.337	159.235	146.162
1552637_at	28.2472	40.4976	5.54842	18.8983	47.1258	8.00066	25.2002	39.8972	35.6338	42.7261	6.05698	33.7381	35.0711	39.6502	28.8964	11.9185	26.8436	34.807	36.49	17.6449	41.4667	52.1121	27.0533
1552639_at	58.5737	75.6099	26.0313	36.1389	34.3954	71.3091	46.1471	49.1799	67.6521	17.7789	49.1788	52.5593	38.2034	9.07071	59.5301	37.531	39.9272	15.5306	51.2793	40.2949	46.5251	41.1339	44.979
1552641_s_at	428.275	355.864	400.335	246.78	278.641	203.559	335.285	533.447	358.245	227.674	195.964	134.222	396.637	341.757	405.895	247.343	273.987	324.719	385.495	492.168	313.668	276.492	248.884
1552643_at	18.782	53.0695	51.3467	6.89472	36.0311	36.841	45.9235	47.5141	45.9965	12.1777	21.9212	65.2687	37.6959	6.70148	13.8077	52.3556	8.97373	76.6742	2.05398	24.5888	58.6177	41.8263	57.7783
1552644_a_at	132.409	128.463	120.397	140.677	83.9949	123.657	194.178	123.028	116.609	86.2549	94.6609	127.923	105.156	160.582	120.021	92.0847	127.09	79.4775	164.056	151.403	114.124	143.994	140.019
1552646_at	79.1571	110.389	99.7484	61.5448	66.1224	88.9945	66.4596	77.2598	111.588	97.7789	99.7769	69.0012	105.908	70.9519	91.745	59.4693	86.3471	97.9638	74.3489	86.0766	108.173	90.9157	76.5687
1552648_a_at	1865.53	1411.88	1634.92	747.194	927.414	833.412	1757.01	1867.83	1998.83	1188.03	1228	1247.31	1803.76	1368.8	2148.8	1585.03	1296.1	1254.67	2148.32	2238.17	2478.18	1453.05	1141.38
1552649_a_at	50.2841	12.605	72.185	31.2936	44.6414	52.5228	26.6353	35.7827	32.2323	34.1746	37.0825	45.6821	52.6961	41.8681	68.9423	45.6331	60.0514	82.9435	51.9102	65.885	44.6335	55.6704	87.8625
1552651_a_at	46.8603	75.609	111.656	67.1997	29.9202	66.2744	58.7174	70.5539	76.3721	16.8746	82.2127	78.402	107.422	79.6227	46.1954	68.1787	59.779	39.6705	57.3468	10.7677	63.3599	70.2123	91.3877
1552652_at	93.9861	158.983	101.397	113.221	99.3916	100.319	94.3617	84.1816	115.756	126.58	111.94	111.622	120.893	148.864	125.448	106.858	107.011	116.647	95.9562	91.2131	118.287	160.718	162.719
1552656_s_at	195.9	107.196	157.167	181.825	188.961	135.314	208.853	177.378	191.92	190.089	177.208	146.802	212.387	167.687	175.835	173.636	174.002	155.274	161.731	128.57	172.984	161.963	142.176
1552657_a_at	32.847	34.2822	5.47869	1.5998	8.56466	14.1573	46.2898	27.7743	12.3193	21.361	6.1563	6.69486	11.378	18.8841	5.06397	11.4269	2.53252	23.0498	2.10731	35.3551	33.8513	3.50341	3.84629
1552658_a_at	110.664	125.055	110.673	58.0552	112.338	93.8769	85.1924	74.0883	105.997	117.537	120.651	99.8777	96.3611	135.72	99.8738	101.643	94.1778	86.235	79.1203	75.1356	72.5801	214.543	222.01
1552660_a_at	308.866	347.896	348.206	277.65	272.842	272.182	308.82	295.408	235.57	190.563	226.72	219.951	302.386	270.737	226.492	311.128	262.695	211.143	276.292	212.638	275.915	299.015	239.879
1552661_at	10.9908	14.9018	15.1119	24.3266	12.8363	34.8727	31.6932	16.4646	4.24851	44.9024	35.8378	42.6165	3.36484	22.5922	4.353	13.8603	12.8635	2.02814	8.55167	1.4057	21.0652	10.9729	22.5658
1552662_a_at	65.2198	68.4646	56.1847	47.6496	52.195	24.2589	21.834	58.0809	45.5808	95.9178	67.0864	44.604	62.7296	31.6203	46.8574	54.1974	42.7353	50.9239	37.6433	16.7008	53.1279	46.7909	42.046
1552663_a_at	71.9495	95.4616	27.0929	64.5696	113.059	50.8669	42.556	62.2534	70.6817	59.9088	29.0623	75.4505	65.2753	119.433	108.383	103.62	62.9158	100.752	45.0846	101.368	92.8222	104.083	108.124
1552664_at	157.501	216.901	185.281	184.5	139.168	145.171	197.463	207.985	196.36	194.84	155.001	191.842	184.557	182.898	241.412	149.791	157.45	150.624	288.188	205.537	216.837	183.058	242.073
1552665_at	75.5771	54.0262	56.7852	38.2488	41.0385	52.8113	94.4488	72.0522	95.6895	55.8359	55.1153	41.8044	48.1256	48.8383	92.5869	64.7632	57.8514	51.0931	100.401	103.952	82.4233	90.7971	100.228
1552666_a_at	39.7979	36.1867	26.4311	35.8693	27.8651	18.5308	31.3954	29.9456	28.5736	29.0205	17.6115	17.1024	8.71826	6.25941	10.5128	31.272	31.3318	17.2985	29.5948	28.8355	22.7991	25.4635	10.2749
1552667_a_at	3.63455	6.36837	7.22001	8.18477	7.60127	10.3051	4.33524	11.502	13.5821	13.6644	2.16371	19.5069	4.96249	8.96572	6.95887	4.75255	15.2232	4.42791	9.43275	9.03674	7.88324	10.2387	8.86469
1552669_at	43.6158	45.3303	53.7923	39.2418	55.5809	25.4025	28.7516	13.6044	24.9683	61.447	30.4786	34.1085	36.6769	50.125	50.2513	42.1742	36.6943	63.493	46.3411	41.5311	47.2527	32.5456	58.3465
1552670_a_at	158.431	115.954	153.324	110.067	120.568	105.388	657.806	592.165	588.258	630.333	641.494	640.578	140.802	131.148	94.7756	111.294	80.0178	78.497	341.449	290.945	334.59	139.052	119.968
1552671_a_at	22.6503	49.6254	52.3273	26.9571	103.181	85.0279	77.1998	61.5423	91.9194	54.8611	49.4435	54.4407	90.2697	81.609	79.8727	71.4813	98.4463	54.4702	65.0612	86.33	71.8686	87.5547	80.2758
1552672_a_at	91.6467	117.636	67.0307	99.9808	72.4139	118.475	116.58	76.4331	79.0489	68.677	137.52	88.1551	119.94	110.886	129.482	99.3491	90.4854	111.885	142.092	111.076	132.484	86.7647	103.454
1552673_at	8.59346	4.68595	3.7214	5.7966	31.1609	2.45214	1.02906	9.19521	4.66267	2.67092	5.81247	4.0403	1.69633	4.93539	29.5898	3.15033	12.2542	3.98151	1.87028	3.93068	2.98201	1.04165	8.18007
1552674_at	14.0208	5.40988	4.81384	2.57828	4.26232	6.16642	4.89976	18.1045	1.68395	13.4551	2.48622	0.726724	6.32817	4.10758	14.6712	1.27454	1.59614	20.0334	20.4246	5.02978	10.9118	3.35276	5.4888
1552675_at	5.03756	9.88038	13.6068	17.8374	3.45363	12.595	1.77837	19.4635	14.233	10.3318	1.80734	3.24628	0.355272	10.8624	6.28698	1.64553	2.1923	12.6744	8.8015	10.0577	14.1172	10.8577	0.848838
1552676_at	40.8541	68.159	53.6421	18.7916	44.1523	11.1953	48.4274	32.443	32.9707	29.8681	49.0782	21.743	33.1847	8.89152	61.66	8.18388	51.7952	40.2568	59.5479	74.1025	51.6945	19.2736	18.6832
1552677_a_at	131.333	101.934	116.066	67.407	138.201	146.722	128.205	106.303	138.57	154.331	135.564	148.047	141.949	142.974	133.931	144.606	120.275	105.35	146.46	110.731	152.382	109.249	125.283
1552678_a_at	213.759	226.118	260.279	280.914	259.376	276.743	243.596	205.932	245.661	245.166	244.944	284.446	231.586	211.663	236.256	234.403	224.699	261.738	252.698	166.771	211.333	234.352	233.056
1552680_a_at	382.628	337.97	303.638	469.497	392.041	383.014	356.694	301.67	301.57	357.428	394.098	388.907	381.91	369.286	343.199	465.088	445.169	400.087	319.549	301.893	319.827	423.087	372.453
1552682_a_at	98.0738	95.332	93.5671	146.593	113.963	119.63	104.941	82.3004	75.598	133.811	142.835	147.588	109.12	101.455	108.378	132.488	149.582	162.3	98.9593	58.8676	85.5859	122.094	124.932
1552684_a_at	124.323	143.302	93.8123	145.689	103.121	187.496	65.9387	112.264	150.113	158.348	150.165	131.778	89.3933	134.991	62.2385	119.258	101.202	149.619	69.6043	59.4339	82.7534	87.3373	105.7
1552685_a_at	74.5894	79.045	83.1788	119.527	74.7569	80.4219	64.3997	72.1682	61.7694	97.6129	92.2571	104.23	96.1656	61.011	60.6077	77.7217	93.9115	106.807	60.3329	37.8762	33.0428	99.4154	80.1718
1552686_at	6.32749	25.4219	29.0438	3.8044	5.06591	5.86629	25.3293	5.60515	18.8922	22.8021	12.9252	9.78471	5.82796	4.98819	10.2245	5.50458	14.9504	7.13906	6.83707	5.31597	31.7491	29.1437	32.339
1552687_a_at	32.3063	28.8819	53.3885	47.0777	24.9138	42.4489	20.5043	25.6982	32.2876	10.3354	20.4935	44.4421	22.2441	24.0153	10.5818	44.1586	59.0288	54.924	6.72593	27.5911	35.9653	52.2528	73.458
1552689_at	10.0936	104.736	10.9923	16.8107	12.4005	15.7953	24.3479	11.1103	41.8108	14.8176	11.0428	17.8844	35.4722	11.8983	8.30951	10.2616	15.1555	14.9377	10.542	11.1887	11.6729	14.7532	6.3583
1552690_a_at	63.3994	75.9357	60.2951	26.0401	12.8446	81.6512	42.4755	65.9471	52.3107	51.1222	73.2194	24.2933	52.1174	40.6569	41.5893	49.3811	49.0293	61.8553	40.4792	51.6349	36.6087	46.0759	44.4075
1552691_at	16.7268	5.62325	11.1323	12.9956	11.1542	11.9512	19.3712	6.71447	14.8749	18.5143	1.67206	9.63957	11.6515	10.6122	5.24414	15.0619	14.5589	11.3598	12.5331	10.7703	15.2911	14.0016	6.44188
1552693_at	8.40992	1.77888	6.04284	1.39673	1.05742	1.43898	2.87227	1.20475	10.0115	2.66732	2.18781	5.0672	1.7272	2.89261	0.92122	1.02894	2.26999	1.93356	4.80672	2.29465	1.33728	3.63857	1.41402
1552694_at	32.1726	29.177	22.0534	36.7201	30.4381	14.9771	30.1489	36.9037	19.5465	17.3604	35.2916	34.3418	28.8501	37.9758	23.8049	18.4544	17.6952	4.51566	4.33302	4.00893	14.9073	25.0609	3.48697
1552695_a_at	82.5753	90.8209	78.1976	98.1495	74.7591	79.2658	87.7321	76.5912	88.9984	112.722	102.706	85.6851	81.2001	69.4886	70.3945	81.411	48.1748	62.9828	54.9046	61.3575	86.7476	60.8071	57.1058
1552696_at	110.733	100.532	95.1668	79.7474	73.3006	74.9874	89.5926	94.0467	87.1174	84.2771	68.6508	66.5702	121.621	109.391	104.451	76.3758	91.827	94.6659	131.703	122.746	102.172	94.9139	86.6597
1552698_at	5.62673	6.58799	3.06886	20.5555	32.6952	5.92583	6.95731	6.27039	5.98151	15.232	46.5252	45.8617	6.23888	5.74156	6.35414	8.28935	8.61954	32.2044	4.24356	7.3168	17.6063	6.23747	4.01871
1552701_a_at	725.892	672.718	677.133	789.298	732.988	780.484	852.38	779.128	788.364	837.346	1031.1	773.739	821.623	691.659	740.774	718.214	831.195	712.974	862.877	880.364	703.14	888.875	924.905
1552703_s_at	1343.17	1226.52	1429.8	1366.43	1469.22	1688.1	1701.4	1757.46	1883	1863.07	1753.77	1804.56	1165.84	1253.02	1386.71	1502.12	1432.95	1410.91	1500.77	1561.04	1417.65	1744.63	1176.4
1552705_at	42.8149	25.8823	15.5431	31.3003	35.5784	18.3754	28.9652	31.9358	24.6428	37.8758	43.601	41.5467	20.1331	9.87688	36.0513	45.6529	32.5884	27.7648	28.0408	26.4083	29.6728	19.8841	22.5174
1552708_a_at	28.2031	35.8206	35.5779	31.8054	50.9109	39.8682	38.0648	14.3357	25.0575	30.5352	44.1097	46.1632	18.9323	27.0998	10.7961	27.8405	48.6398	32.1973	36.3407	12.4002	22.8754	18.0821	36.3535
1552711_a_at	511.124	503.092	524.139	483.433	385.023	406.226	508.821	446.607	508.69	398.484	418.637	390.639	375.812	310.083	321.114	455.108	387.253	323.06	326.751	314.025	336.345	271.286	283.534
1552712_a_at	150.734	229.743	195.013	194.084	203.541	242.84	177.29	220.992	186.187	247.547	166.017	175.653	165.409	163.94	172.296	195.618	212.034	222.308	141.038	152.511	143.915	255.804	212.274
1552713_a_at	28.3474	39.708	13.2551	2.33132	23.1767	20.9022	19.4318	27.2033	24.4595	15.3689	24.9028	12.3307	29.7732	32.2613	8.05459	17.1791	20.6832	27.8557	19.779	4.72398	30.2454	19.9286	23.7776
1552714_at	6.59179	6.78761	15.8083	14.4545	26.7978	2.91847	29.5411	23.4627	3.76754	3.81499	26.9371	13.8367	11.3565	8.56	20.8505	12.6422	3.96515	5.13024	3.12518	8.27112	10.7444	12.8814	25.0179
1552715_a_at	59.5293	58.3582	48.723	72.8155	61.8905	68.1829	36.7069	43.5122	45.8331	53.3719	20.709	17.7078	54.9691	40.4155	49.3613	54.9271	38.1273	40.6709	59.5555	28.9272	33.9281	44.7773	35.2687
1552716_at	184.044	215.735	177.511	208.88	176.634	245.558	148.204	156.988	162.647	189.76	146.193	188.386	165.358	172.473	206.042	221.545	186.888	195.794	144.848	169.923	167.02	174.087	200.222
1552717_s_at	227.505	204.2	174.624	189.882	189.753	222.052	193.146	162.918	195.509	274.132	244.461	246.16	214.085	194.867	152.837	182.969	221.315	211.508	208.87	133.829	212.099	226.993	185.777
1552718_at	23.4146	51.9462	70.2174	29.7455	20.2315	20.3872	18.8114	30.6911	37.5908	26.0564	6.63845	15.0438	19.7768	68.2692	6.38874	12.9105	43.4269	17.6356	4.69743	3.76597	45.4284	25.47	40.6378
1552719_at	198.296	228.088	132.152	302.894	217.86	191.845	217.272	179.361	135.658	186.446	146.044	177.969	213.431	168.799	145.784	178.242	202.052	180.628	174.696	197.757	202.457	158.379	223.996
1552721_a_at	21.5383	10.6143	19.3173	8.42977	3.3481	5.63539	30.4838	39.9404	12.881	21.9063	16.561	31.8067	35.6091	23.0067	18.5477	25.466	8.82458	9.18991	34.9457	15.7991	57.6632	27.1117	3.24812
1552722_at	35.5092	24.041	37.1832	5.08383	28.5343	33.1192	28.9469	45.9521	24.6984	35.5002	34.2719	15.8532	32.0805	30.8697	38.3987	16.2811	16.4311	26.1228	34.7247	30.2776	17.0641	26.5876	32.3147
1552724_at	43.3285	66.9237	49.4812	62.6581	50.7278	47.137	50.456	42.6336	54.8337	66.84	61.58	74.6687	56.7319	70.2084	39.5052	51.6861	45.8951	70.5246	47.4785	44.7919	66.4936	56.5176	42.4588
1552725_s_at	67.0539	111.523	77.9453	28.2393	72.4702	59.724	53.7139	85.5304	66.5621	48.9052	30.9143	41.0663	83.4441	40.1413	60.362	50.2265	32.7005	44.7466	63.298	75.2532	57.2058	74.002	46.3184
1552726_at	6.88636	38.4377	53.1071	21.3438	12.302	22.1257	38.7392	29.4702	45.7488	51.1034	6.59925	30.406	36.5099	27.7137	11.3453	11.5874	6.29008	48.31	23.421	50.8663	17.3688	47.987	29.9895
1552727_s_at	47.9516	43.0615	60.3395	48.895	24.2338	39.2111	26.5582	36.7234	45.6956	35.0644	72.545	32.0394	43.0561	35.563	38.8012	14.3918	16.5438	25.9945	29.1007	34.6022	42.7278	10.9038	13.3201
1552729_at	366.324	436.01	295.375	213.671	243.615	188.447	392.149	409.498	345	249.186	218.675	201.796	259.091	401.558	251.2	218.943	171.608	196.443	247.229	317.41	276.402	179.286	183.37
1552730_at	57.2763	47.0093	16.9307	43.8746	17.2471	25.8415	38.9685	14.9546	29.9668	9.5388	14.7478	23.7894	53.365	31.2986	51.4486	19.4102	20.0802	45.2528	2.77635	11.7989	15.7923	17.3592	36.4835
1552731_at	8.89196	8.57925	1.07303	1.74446	4.95942	5.84055	4.66453	2.03814	2.4659	1.04035	2.25785	6.93266	7.26748	1.71665	3.59789	6.34583	3.11619	0.847478	2.40071	3.3112	2.48666	1.44183	1.07587
1552732_at	14.288	52.041	24.9693	13.1154	24.0506	20.6821	18.4412	16.9388	12.7375	21.9427	23.8581	8.4009	11.9967	11.7135	15.8477	23.4537	23.9548	16.635	29.124	32.1284	19.4269	32.6433	23.2856
1552733_at	1.38418	9.67815	23.4897	14.8399	13.1132	26.5831	15.1667	21.2316	13.1439	11.1869	9.54919	25.1732	0.720229	2.47075	0.522316	20.1064	22.7533	17.096	0.938665	3.78921	0.379857	17.267	18.5033
1552734_at	133.031	138.77	110.747	147.676	127.825	155.074	101.302	145.036	132.846	149.65	152.754	155.91	126.017	109.358	101.577	151.141	137.766	140.676	126.087	141.079	95.5069	143.967	140.279
1552735_at	55.1932	89.9161	40.8722	97.0715	56.9293	74.0515	76.8381	47.1948	54.7123	161.938	102.654	148.375	73.1406	46.6063	45.0895	72.6878	64.5694	36.6449	53.7225	61.0888	43.4631	56.3913	62.9902
1552736_a_at	37.9202	46.12	9.73079	6.46766	54.1447	29.277	37.0001	18.0021	15.3993	40.9902	52.2825	24.0819	32.1637	10.4722	30.8398	31.0323	11.692	25.3185	16.5679	27.5135	22.9403	25.8273	3.23331
1552737_s_at	11.3185	45.9758	35.1129	34.7861	25.7215	16.7735	32.4513	34.1435	29.0622	22.9326	28.9226	20.8101	12.2049	21.8853	14.4131	13.5997	21.5241	24.379	11.2151	35.0084	40.3229	36.513	21.3374
1552738_a_at	162.286	208.621	202.367	210.374	212.467	229.783	187.661	256.268	227.317	203.008	173.829	217.141	171.65	207.171	199.49	197.35	212.045	176.205	196.705	175.73	154.941	197.267	234.984
1552739_s_at	219.621	203.65	207.122	216.174	201.242	208.76	158.152	195.699	190.339	214.474	237.777	258.731	164.608	185.238	168.311	180.31	228.707	254.1	177.589	143.255	205.435	204.597	213.37
1552740_at	74.138	73.5861	85.7312	95.354	94.8162	134.21	83.0058	51.89	131.046	11.6412	30.4403	64.4613	130.364	90.025	91.0532	97.1547	82.4873	112.843	89.0432	79.0219	46.0527	165.195	87.0404
1552742_at	22.2141	15.9057	8.81624	20.6038	3.81349	9.16267	1.10996	2.62347	1.43358	14.342	4.66252	23.8452	26.1927	6.46293	13.1082	10.1406	1.69076	2.87665	2.43267	4.15952	12.9638	14.235	2.33727
1552743_at	35.5676	57.1739	41.576	16.4564	54.7825	40.3868	9.95145	62.5517	10.675	15.2604	44.0053	14.1703	17.9714	10.218	36.1482	39.8534	6.86169	17.0727	10.4383	39.4993	43.7474	52.4546	22.1498
1552745_at	1.12689	10.8792	20.2814	1.92386	31.0893	2.11083	1.17051	8.93968	3.01672	6.20424	2.27113	16.2179	4.34976	23.012	4.82462	11.574	4.17857	2.83013	15.977	16.9678	4.22871	2.53945	2.85361
1552747_a_at	12.2065	22.0412	23.9939	6.29928	16.2353	23.0384	22.2157	31.3768	27.5433	28.1448	13.0462	18.2857	32.1504	14.7003	22.2043	12.281	1.78872	21.0557	16.4308	27.7634	0.906437	11.0104	41.4992
1552749_a_at	27.4019	79.0564	15.0382	28.9039	12.921	61.0873	12.0915	102.979	11.8112	54.1953	16.9415	19.3304	7.36203	68.3956	74.6717	56.0042	24.0341	23.5208	82.0469	20.1599	14.5658	25.455	23.0803
1552750_at	2.21443	2.77615	4.03187	6.25665	8.09961	9.22194	14.1344	8.42597	1.68727	3.97207	5.70232	2.01673	8.19856	1.06325	2.54457	1.97421	2.14059	11.9365	1.76595	2.20724	2.7681	2.61564	3.06495
1552751_a_at	84.6953	97.3448	80.0905	59.7966	67.6181	40.6117	104.626	102.956	45.5789	93.0505	79.0717	70.3594	106.478	86.7156	115.057	73.982	76.6186	68.0852	124.009	99.828	126.049	69.8182	92.5848
1552752_a_at	22.7817	54.4757	46.5077	30.6946	26.459	18.2315	36.2688	28.1134	43.7339	44.577	36.8693	39.025	13.4526	34.1713	47.0869	13.6313	42.8004	60.49	37.46	32.524	3.29995	5.47052	58.3342
1552754_a_at	18.6446	14.0895	33.3199	10.1358	9.22668	19.8033	26.4814	5.18921	20.6387	3.51979	13.7814	5.09593	4.96761	1.01107	1.80318	9.83159	4.7437	8.56247	11.0014	29.8028	7.7769	1.11055	13.1184
1552755_at	51.8359	52.1381	54.7866	97.1766	83.6668	39.0245	32.6775	16.0578	38.5431	56.297	34.5484	55.8514	17.0444	33.3656	27.5052	77.9058	64.4349	50.7426	8.89647	64.7718	14.9056	50.7589	10.5016
1552757_s_at	1.2999	2.75383	1.90028	13.7606	18.1596	10.0074	14.7714	1.67392	1.47559	3.7339	4.01043	4.70047	3.78248	2.31514	1.73239	13.9893	3.67894	2.19506	1.4458	1.12387	2.3187	2.61685	3.83046
1552758_at	26.5101	3.77144	7.36489	3.1012	3.42826	7.69739	3.35121	11.0977	3.81803	3.62191	4.05467	2.09187	17.0727	2.73452	15.9061	7.27347	4.40462	6.93666	5.86534	24.5302	9.77301	20.3077	15.403
1552760_at	11.6907	13.7559	1.88496	6.90859	2.00881	18.8329	25.5942	1.38451	1.74178	46.8426	18.5998	1.08644	1.90907	2.13547	4.48625	22.7581	14.6462	1.68719	14.4465	12.3142	8.78316	21.4566	14.8418
1552761_at	103.576	89.8702	37.4194	12.5652	83.2832	36.0505	71.5373	81.3717	57.1534	61.4003	67.0057	71.302	80.3145	41.6301	80.661	55.3923	61.0776	55.4258	85.3268	81.7713	45.7483	42.9841	61.4233
1552763_at	0.809401	31.9939	11.4993	15.9767	4.0206	13.1215	2.70345	2.47782	1.60704	1.44998	0.848424	3.47693	0.842724	5.45195	1.71928	3.11143	9.42065	0.968852	1.30531	15.2501	4.11997	1.12274	1.81793
1552765_x_at	42.0249	61.3694	39.9725	13.895	9.95715	34.535	27.6725	21.022	38.8641	23.4528	6.00554	33.157	23.6605	5.97634	5.90389	40.1915	35.0385	28.1367	17.7497	26.6812	3.97733	43.1195	26.1278
1552766_at	442.916	391.079	384.634	335.639	404.111	464.496	494.102	457.667	434.032	356.21	397.102	373.015	330.099	380.033	362.569	444.144	366.164	338.416	336.629	270.395	285.596	365.856	251.561
1552767_a_at	5536.03	5845.17	5845.98	4781.66	4782.5	5497.82	5851.39	4368.93	5904.29	5306.85	5308.67	5445.02	4101.03	4748.56	4768.76	5125.19	4830.5	5082.56	4317.23	4465.35	4596.9	4436.58	3456.99
1552768_at	11.4754	89.5975	6.50698	7.65226	6.21516	4.30937	17.8421	7.59592	22.5302	11.2428	45.5135	11.0309	83.1458	9.59442	9.14005	11.5447	10.1974	41.4755	32.4086	10.9431	14.6458	8.56705	33.6226
1552769_at	60.1897	77.4694	36.1884	49.5983	62.4651	39.5509	57.0795	56.3232	43.3431	5.01396	57.5038	19.6254	63.6861	71.7053	60.1256	29.4654	54.4635	47.8998	82.392	73.6886	53.1665	67.8537	54.8728
1552770_s_at	22.4974	38.8611	43.0808	18.9834	22.1369	47.5002	34.2965	41.8273	19.0098	52.5129	36.7546	41.9004	22.73	37.0357	21.161	26.2962	62.292	49.382	33.8508	40.3071	23.5189	32.4757	31.4203
1552771_a_at	33.2863	39.3733	50.8072	30.4096	35.6879	5.35487	33.5291	5.41997	27.8861	24.6881	31.0516	44.2187	6.22097	6.1814	29.5468	7.05508	45.6806	39.7411	46.6574	14.7902	30.1724	8.28633	7.3993
1552772_at	24.8152	38.1566	30.1302	28.3447	31.6642	31.3889	39.6772	28.3382	21.6211	46.8523	20.1008	29.9389	39.7716	36.0001	22.5631	12.2444	32.3711	38.7698	37.8203	8.26891	30.948	26.9615	54.2508
1552773_at	49.598	59.2828	41.7525	16.8346	63.4344	57.4202	30.8525	41.5434	59.4723	44.0571	44.2565	19.426	41.4839	40.8808	49.4435	54.647	39.9251	46.2213	62.333	36.447	64.3548	48.5723	27.6411
1552774_a_at	82.4492	114.077	86.8627	158.111	145.111	125.993	62.8568	47.5863	101.109	102.791	98.7345	130.305	107.829	91.4618	108.156	85.3787	101.456	151.459	95.6909	110.05	112.638	92.8758	84.6047
1552775_at	9.30184	59.5524	93.5887	68.5542	16.2205	11.8331	12.5678	33.7976	48.5321	29.0924	45.8056	35.5223	27.1381	33.4384	6.71355	6.99161	49.1652	8.56542	30.5508	32.6044	28.0167	17.2921	16.3007
1552777_a_at	785.761	604.099	827.542	892.835	999.84	847.675	710.967	456.609	659.562	583.66	526.468	415.451	782.081	645.175	509.762	1100.97	1063.71	987.737	583.825	618.585	496.269	1003.08	963.63
1552779_a_at	64.4937	43.891	65.9797	58.6295	91.8156	52.1946	47.2216	58.5372	55.041	51.5706	49.3419	99.5925	61.9768	78.2444	53.9094	92.7091	74.3319	89.4337	77.007	60.8553	80.919	76.7392	94.6221
1552782_at	259.622	262.256	184.962	255.792	313.489	375.463	131.683	151.733	174.186	180.409	166.588	178.429	234.309	226.191	230.449	369.678	323.046	355.968	223.671	178.741	201.348	283.949	256.916
1552783_at	32.2866	18.6475	46.4351	31.463	23.5901	33.0214	47.8941	13.3023	37.032	37.7345	1.52117	23.7905	29.5252	30.9034	13.1089	36.4301	42.7994	38.4903	51.6152	45.235	38.7262	22.1169	40.0757
1552785_at	39.929	33.5084	62.5565	29.7614	26.7276	55.6086	37.0571	34.9105	52.802	41.216	66.345	50.132	39.707	15.8332	40.1923	47.6985	33.6863	32.0639	59.4335	37.1645	28.2808	30.4115	36.0509
1552787_at	69.329	68.7594	47.8584	59.191	60.6069	63.1634	65.0271	75.1928	90.1644	107.749	82.8429	86.0091	47.4266	72.7496	60.4317	60.7698	62.0743	77.4045	58.6302	47.9933	54.1281	47.3075	57.1056
1552788_a_at	115.826	136.844	91.687	121.357	144.395	94.4591	105.56	155.045	78.0053	109.896	106.742	165.433	87.3177	82.089	86.1629	94.9775	72.9346	100.169	81.7729	101.645	138.094	104.575	78.3045
1552789_at	437.835	478.92	462.645	450.449	455.417	410.675	388.885	305.132	389.694	296.301	385.877	377.769	345.936	249.868	254.429	464.924	231.378	246.344	267.639	241.496	272.186	259.389	236.573
1552790_a_at	1071.87	948.054	897.992	986.679	1075.76	1037.26	732.325	868.804	735.464	863.641	806.992	823.155	860.535	718.869	864.018	977.981	955.409	826.204	783.479	673.532	684.014	822.287	725.912
1552791_a_at	23.1857	31.5808	13.8817	28.2025	12.0357	19.2603	41.0222	13.5966	24.6604	6.54144	20.6051	32.6198	29.2768	23.0467	8.97527	15.4432	33.2385	16.2724	11.0387	20.8902	17.7776	26.0257	2.29363
1552792_at	51.1503	52.6084	50.8346	24.3642	24.2827	5.07253	61.211	44.4658	60.9827	25.2672	33.657	35.3109	38.204	43.1386	31.7811	31.0083	39.0786	36.7794	71.2907	26.0697	57.438	52.8683	46.4396
1552793_at	24.39	29.6386	58.7514	27.1742	27.4556	10.6069	21.8191	31.1016	6.3063	32.0026	7.63134	44.2325	22.0729	21.6474	2.27337	25.9505	56.5667	20.1201	32.5088	5.98474	59.2654	8.82349	7.37227
1552794_a_at	49.8308	72.5926	45.5389	61.6391	55.6038	67.8777	57.6056	47.5382	57.8942	54.0185	46.39	57.9732	54.1623	62.7262	59.5055	64.7254	50.9334	82.619	39.6967	56.9102	61.6248	49.2209	46.5751
1552796_a_at	26.4606	45.0173	62.3154	33.0174	45.0443	46.917	40.4127	32.5666	8.08164	25.7	41.5738	62.1543	18.1803	26.8523	30.1333	5.67373	35.1585	50.5519	20.6988	28.7305	30.9818	31.0007	58.5766
1552797_s_at	134.147	90.124	134.843	395.27	444.959	530.707	95.4538	111.628	86.3454	211.587	204.554	226.636	103.926	102.557	144.159	381.701	438.884	372.933	78.4253	89.1761	111.766	293.933	253.631
1552798_a_at	25.0173	72.3562	48.1904	66.0336	87.1741	68.2943	33.5241	46.6718	59.1782	52.0706	52.8476	67.9165	50.7062	43.1482	47.5119	51.4275	22.2062	74.8514	42.2244	48.4046	41.3298	82.2594	87.5458
1552799_at	5.78079	9.26605	11.9667	14.3269	3.23743	8.31114	9.10267	7.03788	3.76502	14.0559	3.64343	8.21909	5.98689	6.59905	11.7323	5.77325	7.70175	9.43214	5.51118	11.4667	7.64258	1.91888	9.45908
1552800_at	93.9667	144.608	102.055	12.1518	75.7724	18.3985	17.6855	63.8376	68.587	74.761	60.7897	78.8824	17.5781	51.7907	17.773	74.2011	85.6265	19.8593	77.4121	77.1551	53.5621	75.802	61.57
1552801_at	4.78635	2.61867	2.18637	2.53871	2.3641	2.19928	2.27669	0.76094	2.10902	2.07771	1.7053	1.42707	2.13746	2.18768	2.95455	1.91795	1.49419	1.48855	2.55326	1.75558	2.62486	3.83033	1.29856
1552803_a_at	53.1422	7.81626	33.7277	5.68897	43.3861	40.747	36.2642	2.74501	10.5332	6.36643	24.3583	44.5056	40.98	52.6582	18.4623	20.6342	38.7573	29.2428	40.774	31.901	14.0119	65.5483	78.4552
1552804_a_at	59.3098	79.4481	111.383	88.8826	108.639	93.9415	97.0162	48.2729	81.7045	78.6509	100.982	101.577	110.922	75.738	103.246	101.751	113.988	135.663	104.174	102.244	84.031	56.6789	96.7583
1552806_a_at	47.733	61.532	37.5839	22.6138	67.9628	48.4647	45.4673	17.2457	41.0587	48.7276	44.9766	14.9521	43.65	30.6385	53.1924	20.1713	63.8722	50.345	20.0937	56.7155	63.7637	39.8394	56.7059
1552807_a_at	6.58731	60.9894	30.8462	4.17603	39.9163	7.29104	36.1715	4.48357	7.02384	5.7931	20.2073	3.61871	23.331	6.03919	6.40976	23.9437	17.2287	8.31626	3.5887	28.5974	26.1772	16.641	33.6885
1552808_at	41.1891	41.1844	33.1749	28.0468	43.9215	36.21	36.5403	45.4509	42.519	39.4862	42.7269	37.2186	49.5913	44.7877	27.4501	43.2619	33.7781	36.9194	16.7347	43.031	24.9755	38.2393	62.1745
1552809_at	40.5743	42.7133	49.4201	31.2771	53.3796	54.2838	23.8006	23.8532	17.9872	13.1468	11.6034	46.6466	50.6225	57.8613	65.7041	49.3588	44.0876	31.4937	7.00297	51.2107	39.7068	35.2681	37.6681
1552811_at	18.6303	138.057	16.8677	33.6573	82.3944	35.0697	76.753	53.2716	24.4875	58.446	35.3556	29.1975	23.0246	40.276	28.4623	34.9565	19.2476	99.8285	69.2388	26.6419	31.117	56.3445	45.7226
1552812_a_at	122.163	121.381	103.698	80.7004	111.555	85.24	123.459	109.104	94.4151	131.151	105.482	97.234	95.506	112.685	55.7545	105.73	81.8867	81.4677	105.941	77.5683	85.1468	94.0008	90.0291
1552813_at	40.522	21.7382	9.472	42.5228	9.06288	26.8992	15.5523	35.6936	11.0063	25.7568	10.6702	12.2078	10.4223	12.9387	5.36854	4.48418	8.50228	8.21449	8.74579	10.3875	17.8142	7.64576	35.7279
1552814_a_at	4.13509	14.074	2.19204	5.89815	29.8651	5.61492	2.4105	24.006	6.67091	6.55244	2.95115	7.90384	4.40305	6.89109	5.48335	4.94236	3.99655	5.02457	3.10081	10.5048	8.72384	5.52671	3.29485
1552816_at	66.1078	66.3223	28.8368	31.4232	41.6968	48.9553	46.3089	36.1493	47.9434	58.5275	55.8395	32.9628	56.189	52.4613	40.8133	35.3052	34.7992	85.2907	62.6491	25.9103	33.8119	20.1142	85.5359
1552818_a_at	1.27024	20.6132	2.65848	1.28689	3.60128	3.87887	1.63534	5.12139	4.33456	6.24296	2.43986	8.41839	3.06468	2.9309	17.7563	2.41275	2.36608	3.91278	4.08514	3.66266	2.89037	2.71005	2.39087
1552819_at	49.8555	68.8811	39.1079	52.0168	72.4969	58.8126	47.0011	50.5775	72.3208	53.7743	34.5259	58.5472	36.8384	63.2813	25.5607	40.6517	42.7381	49.1078	39.4488	40.9075	49.0447	44.3729	42.8757
1552822_at	223.644	209.9	188.812	154.651	155.003	172.873	267.653	189.297	244.855	195.035	202.457	201.127	166.099	192.427	175.404	145.654	181.574	155.518	145.731	187.506	183.655	156.783	95.3394
1552825_at	3.63683	19.2495	2.72632	3.89772	27.3151	3.8982	7.26135	13.8092	13.6309	10.9861	11.9022	13.4572	17.2105	4.83043	2.96875	9.11701	17.5955	27.1102	8.38082	20.3812	3.06855	3.25778	7.05283
1552826_at	2.21079	15.8215	14.6567	5.45487	4.44211	4.96783	10.4174	29.8134	2.68838	2.58303	13.2828	13.3886	12.4844	15.6769	6.32251	1.2804	7.36625	12.3089	2.149	4.16135	2.66486	5.61165	14.0278
1552827_s_at	34.5253	78.8893	38.2771	33.8422	40.2869	59.4457	34.2757	39.0961	30.9207	39.1183	29.0594	58.5393	35.3076	70.4256	43.0016	43.8781	37.4046	39.6216	47.3017	58.3646	25.5232	53.1518	31.3304
1552828_at	54.1282	82.0893	11.5033	59.3744	54.216	9.80684	60.3263	41.9731	52.6259	32.7911	57.2206	78.0985	68.7315	70.9211	43.6269	28.8408	46.9777	65.0888	8.51214	29.9156	36.2889	52.5006	42.065
1552829_at	79.3302	87.7445	83.4179	44.691	37.5961	59.8455	90.4796	115.013	86.2935	48.6338	67.9587	73.4412	67.4812	51.335	68.3727	39.345	54.7335	58.3129	97.9907	94.34	64.6256	58.1226	68.6436
1552830_at	30.5787	35.9129	41.4514	29.3024	22.5351	20.4705	33.9201	21.0965	18.1974	30.1694	24.2048	37.2413	32.2213	41.3358	28.3029	31.3657	18.8905	36.8207	16.525	47.0583	25.6113	24.5028	42.6246
1552833_at	6.42696	36.734	8.3394	44.6877	7.04107	7.13673	8.87785	4.08984	4.22862	28.756	23.9105	5.70983	11.8312	10.685	10.5084	8.21531	10.2041	13.9554	6.77156	7.07635	10.9273	7.87754	12.6951
1552834_at	45.8612	12.4458	5.05511	27.3371	60.1546	7.27687	10.1094	58.2399	6.89373	40.0317	19.1081	40.5539	34.7847	19.3697	4.1851	23.4215	16.0533	29.7117	18.5223	26.2642	7.17055	19.5937	56.5559
1552835_at	2.23536	4.67561	5.92622	2.30897	6.97506	15.8071	17.6918	1.63626	3.50206	20.2224	5.77992	32.2388	3.70221	17.099	20.1758	17.1927	11.0241	5.22614	33.5896	11.224	9.78044	18.8545	29.433
1552836_at	168.897	103.655	102.293	111.429	75.4047	133.151	143.499	128.333	188.694	98.5809	79.492	142.303	107.645	125.589	122.531	127.065	96.574	111.817	130.652	126.287	159.585	152.718	148.605
1552837_at	11.4881	24.3312	30.2951	12.6989	17.9729	26.2817	26.7721	25.1004	25.144	13.7554	23.437	11.0638	22.1185	27.6321	27.8623	25.9504	12.7097	18.3783	9.15801	28.8388	8.23636	21.8036	15.0667
1552839_at	30.3665	45.1493	35.7286	24.482	49.884	33.1857	8.97211	25.7541	33.7799	28.9819	31.5081	50.9833	46.8853	31.1105	39.3267	27.776	17.8631	43.1244	41.6308	66.2627	43.0448	36.9254	38.32
1552841_s_at	1.13549	2.46166	5.79142	1.96508	1.26349	2.16901	2.41407	3.3413	1.616	2.21274	2.64385	2.46757	1.21935	1.06502	7.69544	1.50059	2.42666	1.64486	0.998011	5.70845	1.61371	1.57561	1.95833
1552842_at	30.2343	12.2935	1.9873	5.31203	4.54951	7.00604	26.3718	13.9183	35.6231	23.5729	5.80903	7.89773	4.71748	41.3657	15.993	4.27757	4.32343	28.2967	23.6277	3.62106	19.9976	13.4092	18.8418
1552843_at	4.79224	2.9938	2.71949	3.43551	3.05978	3.37354	4.29808	24.087	42.6707	26.4404	7.04183	2.09543	19.9601	4.95215	3.45398	12.5531	10.7032	2.42193	3.64582	8.27099	3.20187	12.5457	2.96425
1552845_at	11.5227	29.5364	11.2145	24.5896	15.5593	82.6249	83.5304	85.4224	80.0884	79.3539	50.805	51.4808	84.5651	74.9032	12.1663	48.4745	49.714	81.6912	107.45	8.94588	97.8557	49.2765	31.4697
1552846_s_at	58.5374	79.3168	73.5559	41.5933	8.31782	45.7359	46.3263	35.5941	62.2636	14.8416	6.08541	36.6678	69.9468	39.0422	8.15649	58.0054	33.2844	51.1924	51.0796	75.9749	78.9418	55.5111	28.9479
1552848_a_at	21.7226	71.5792	29.7199	31.6556	33.3231	46.6441	48.7332	33.1341	49.9006	29.8347	19.0459	29.7344	40.8555	39.6084	28.4538	22.115	34.903	41.0748	28.744	39.1327	41.3004	42.7601	43.3531
1552849_at	20.8993	8.02748	1.83634	11.4562	17.2689	3.01523	22.3115	12.0216	2.0151	16.948	21.4403	10.0585	26.435	11.0073	30.8032	2.88673	9.64118	23.4583	1.73433	1.99054	15.4532	12.3703	20.5255
1552851_at	3.84043	7.6491	6.70933	28.5566	3.51476	6.94514	5.16924	13.0219	18.3431	7.8821	13.4869	32.1766	2.83719	2.68423	5.04209	17.0883	15.4153	6.6216	16.3261	4.12262	5.56482	2.74855	17.4362
1552852_a_at	46.4815	44.0509	19.1894	37.5227	40.4235	27.4457	37.655	21.6325	34.5955	45.6621	24.5259	28.4057	45.1507	41.4148	29.2435	33.4876	55.3137	20.2693	20.0386	14.0293	45.2955	22.3014	38.7628
1552853_at	33.6138	19.7013	6.45262	40.1196	25.2908	54.2487	5.79882	39.1801	33.7548	15.0345	4.03817	48.9893	7.32949	5.45179	4.40995	6.54978	20.6744	10.4961	8.28669	2.81682	6.65719	8.61765	6.33045
1552854_a_at	3.42024	4.32094	4.48114	4.47334	5.90048	1.93638	6.11487	4.03585	2.22225	8.80479	7.58373	6.51745	2.12923	1.90024	1.97564	1.45795	4.72784	1.90559	4.48882	4.0739	5.16063	4.89472	6.35293
1552856_at	56.4136	29.4409	54.3274	22.4869	23.6835	14.9328	24.524	11.669	21.7828	25.4585	13.0959	48.5338	43.9697	20.9539	19.8686	34.3413	26.4951	18.286	25.0832	31.7167	39.4297	21.92	40.3772
1552857_a_at	5.24407	4.87752	4.42341	3.08165	3.67123	7.03385	2.63541	5.10236	3.35417	3.47274	2.05853	4.5328	4.85093	2.21408	1.97904	4.07025	3.448	8.66464	6.75508	6.59619	3.80746	3.57204	2.63803
1552858_at	36.7272	32.2313	63.2805	15.4261	45.4918	31.3448	30.6965	39.3466	32.4648	32.0213	16.6397	51.8067	32.1516	34.7381	33.4674	37.2742	38.0891	24.5848	28.1348	36.2373	30.4743	28.6037	34.6336
1552860_at	5.85076	7.55068	5.32075	4.44987	22.9692	2.02908	2.80391	6.52251	5.83863	4.79188	2.46131	2.98389	3.97225	7.25382	3.43801	13.3644	2.03609	5.16149	1.87069	1.02606	17.8066	5.4516	5.86128
1552862_at	107.043	150.593	102.706	162.457	108.047	143.995	137.565	57.9298	106.566	107.227	94.8625	148.828	81.5474	102.12	114.381	149.577	172.379	141.976	129.264	69.1158	175.085	197.772	295.606
1552863_a_at	143.166	266.432	152.012	186.855	168.598	159.95	125.169	147.334	155.894	131.442	147.793	241.754	168.923	110.543	185.581	138.584	150.654	162.435	124.839	153.832	242.772	216.366	134.327
1552865_a_at	25.1682	23.4486	5.28003	7.35868	20.8118	19.1566	32.8032	5.84829	7.08992	16.116	2.917	8.46097	19.9377	19.9889	2.13285	27.5956	31.6454	21.4868	26.1986	5.2294	41.1831	6.62568	23.1086
1552867_at	211.763	286.024	166.529	177.318	186.118	148.167	171.945	192.961	103.334	176.798	126.335	134.449	172.809	166.421	165.004	144.1	114.267	142.965	150.666	116.36	167.995	156.305	137.599
1552868_at	118.591	72.0841	116.951	40.6187	49.7929	98.4736	55.9623	67.5305	69.5849	207.973	147.073	145.96	88.4179	65.01	54.8646	44.4325	47.2885	84.0198	83.8592	49.1066	64.5595	11.0666	75.7446
1552870_s_at	34.4072	39.9355	37.9213	19.3468	29.9864	21.5509	38.0476	20.6484	25.0368	29.8063	44.525	40.0657	7.30713	20.216	24.8501	29.7986	24.8672	20.3273	20.027	14.0505	20.2523	25.3496	17.8754
1552872_at	3.57905	2.2523	2.64516	1.61908	3.44036	5.78464	2.39266	2.71321	4.66398	6.86428	2.78174	2.96126	5.11592	1.97821	4.97199	4.30641	5.56282	2.38284	7.58745	6.5634	2.17702	5.41835	3.25945
1552873_s_at	143.754	156.686	108.26	69.9202	109.998	112.922	97.3059	110.915	114.754	97.7936	149.551	152.085	144.401	118.37	121.425	114.485	132.456	171.386	93.7128	77.4391	196.731	161.31	175.795
1552875_a_at	13.7059	17.4885	19.8572	17.1006	3.83684	22.0747	28.2884	5.18983	24.4401	29.4614	27.1759	21.8682	17.5639	13.6276	18.4538	24.0695	16.297	25.6815	25.2289	6.8263	28.6483	20.7938	17.1164
1552876_at	39.0372	39.8983	23.8015	18.2028	22.5186	30.7296	18.867	16.2228	29.3729	17.6473	23.6352	50.852	20.1601	23.2507	20.31	16.2065	13.2541	8.44409	23.0871	19.6649	27.9049	29.52	22.097
1552877_s_at	36.1098	52.425	29.9034	24.3229	12.0247	54.165	39.1878	15.9761	44.5787	67.2136	21.6932	41.3683	52.6774	32.3651	60.5124	43.8018	30.3072	41.1443	64.3001	65.0781	33.599	41.8243	26.6535
1552878_at	27.0447	29.5931	19.8343	12.6303	42.7787	32.8329	25.9183	3.73656	25.548	13.1093	36.1957	20.9677	17.3258	16.0758	13.5271	22.6062	16.5779	22.6085	24.5315	2.7023	16.158	24.5268	13.2738
1552879_a_at	94.2418	88.1397	135.855	85.5042	65.4053	110.127	127.014	107.19	52.5483	119.592	69.2403	98.365	110.365	130.287	114.615	88.8505	109.317	169.011	92.4072	63.5803	101.629	126.6	51.7445
1552880_at	14.2408	17.9659	9.4334	11.0178	18.6684	2.00544	6.46702	2.62298	1.83544	3.03691	1.66196	5.40485	8.68333	1.55932	2.43387	1.16651	11.7977	3.14247	15.2719	10.3078	14.6061	7.42368	15.8278
1552882_a_at	34.0188	84.9583	82.7946	35.3096	40.1871	36.8244	37.9241	63.4499	55.8144	41.1493	45.8867	30.7309	40.9012	50.9246	56.4573	44.2909	49.1218	50.5791	71.8461	57.7344	46.8706	61.1057	47.54
1552884_at	34.4683	62.2452	52.791	28.8879	61.6128	40.7543	16.4908	48.7042	64.598	15.6724	5.87692	50.4198	43.3699	56.3496	59.077	31.8065	41.1145	38.0363	22.2859	42.8959	39.7945	70.5619	52.6926
1552885_a_at	38.234	29.9357	20.7461	20.7786	21.006	38.3361	20.4824	16.0042	7.53534	34.3934	10.0472	24.6793	67.849	59.6407	60.8679	22.9892	21.723	27.6729	58.5015	51.1675	78.8698	17.1071	22.4205
1552887_at	31.9543	65.3428	46.8113	35.8362	47.8552	25.2165	44.8708	27.9282	7.44574	48.119	27.2632	28.0028	53.6363	37.1771	34.9739	34.2211	20.3993	26.7816	26.0849	49.3959	24.1964	41.5654	64.5615
1552889_a_at	84.9948	192.111	138.321	125.681	127.32	109.16	132.494	118.312	118.252	111.193	141.509	129.169	97.4905	117.912	73.3844	136.109	118.846	123.266	132.139	100.652	154.338	55.7085	123.259
1552890_a_at	4.71425	14.1225	7.42716	4.44992	12.0052	6.22149	14.2161	32.9472	5.16399	21.9587	3.41831	5.32656	5.92041	8.20875	6.90631	5.01484	7.93601	4.23685	8.29249	14.8785	19.3428	9.3515	25.1088
1552892_at	5.81847	15.0575	5.23585	14.9626	17.3282	3.31164	12.4691	14.7596	4.34991	5.02135	2.92748	55.8274	18.3118	18.1349	8.09279	8.01922	26.3937	6.31679	9.60073	3.612	26.2717	10.6627	29.5098
1552893_at	88.5903	125.645	32.5586	134.861	112.117	122.758	54.332	48.165	114.979	83.6715	58.6865	131.662	101.577	57.5683	94.0129	73.5143	84.486	64.9466	97.1284	93.845	93.1795	40.5927	65.7625
1552895_a_at	52.8212	29.2676	65.3596	49.8882	25.6252	47.1942	59.3649	54.1759	59.349	45.9783	45.1514	65.7045	50.6718	46.1135	47.8416	35.5603	26.6078	36.292	49.2558	71.7019	57.0267	24.6506	33.8378
1552897_a_at	18.7222	18.3966	13.1325	16.38	13.7795	30.803	26.822	13.6845	20.3143	23.708	17.5151	8.14349	5.818	18.7336	36.1428	21.2301	37.2922	40.9929	24.1738	16.0066	20.7746	24.1485	19.4408
1552898_a_at	5.41274	8.88965	2.27746	7.17119	25.9607	32.6939	19.7953	5.12003	11.2094	13.0154	18.9962	1.4932	6.8574	6.4794	2.71262	4.47283	1.83323	17.9499	2.84133	1.38633	4.00561	6.36174	2.95015
1552899_at	89.601	111.523	87.1262	80.5013	77.0251	73.3784	62.7787	62.5007	80.8463	88.3144	70.6125	69.189	64.0429	80.4627	83.0173	98.6896	81.1358	49.6425	102.531	48.7496	77.8366	85.1182	72.5079
1552900_a_at	39.903	11.3763	18.5224	18.3317	30.965	27.5685	20.0377	2.72175	21.2022	15.1422	4.02082	5.00646	3.10493	13.1877	19.8414	2.74542	19.1809	1.80295	19.7199	4.066	20.3896	10.7581	5.30258
1552902_a_at	4.58219	10.1562	2.89312	2.63711	4.18819	6.19565	6.21546	2.45838	5.77139	20.6235	3.30536	3.75601	2.22689	2.24303	2.20103	1.98006	4.05042	4.08644	2.86313	5.86185	3.85999	3.24393	2.56337
1552903_at	39.1411	9.24458	2.45904	1.75864	9.6272	7.76898	1.97287	31.321	19.3917	34.8831	3.21377	6.47499	11.1004	39.6424	25.6738	27.2965	8.02822	21.6631	10.4573	6.8604	12.2891	4.21109	7.60893
1552904_at	9.73061	13.0117	41.1948	24.7922	12.771	29.5286	26.447	16.1403	29.0943	24.5267	17.024	9.50936	3.48681	7.33978	9.68408	32.5337	9.51679	17.3215	16.8372	1.01717	26.3781	24.5204	59.6971
1552906_at	12.4344	9.79417	7.49509	16.0929	7.75642	18.497	28.2911	17.3394	18.0601	18.1057	14.5417	8.62926	17.9269	23.1186	39.6896	12.2703	13.1348	28.8377	13.4553	4.9954	16.6448	25.1213	15.6113
1552908_at	27.0624	42.035	27.4115	23.604	4.855	28.871	20.4543	33.6224	33.8484	35.9617	14.9277	29.6794	18.9303	22.3838	20.133	20.8233	15.471	19.1166	29.9874	54.2188	17.9434	0.642541	3.56872
1552910_at	7.85296	49.3296	32.7003	17.5736	12.8262	39.1708	54.2656	22.8363	53.5837	65.7408	42.153	28.1517	50.8553	51.7049	7.4569	17.0817	15.7071	45.6233	39.3722	27.3133	12.588	24.8371	27.8064
1552911_at	6.94792	6.85977	10.2959	6.53162	34.7289	11.8272	6.16609	38.233	40.8151	31.1499	50.0007	24.1636	47.1109	3.20455	20.5131	10.4292	4.96293	4.03648	5.81988	3.04258	1.84207	2.80878	3.69103
1552912_a_at	5.64829	4.99709	0.971914	0.762567	9.94773	1.75637	2.3533	6.41694	2.63111	0.791968	2.35301	12.5231	0.840021	0.682614	2.75543	1.74477	3.67198	1.8771	2.87478	1.53263	1.25277	1.50654	2.24309
1552913_at	1.12534	12.5748	36.5988	4.70157	5.1069	2.91187	15.0779	12.6816	2.66333	30.4605	0.713622	17.4183	3.16897	1.60895	8.29082	3.11608	7.76603	17.1005	13.1202	3.18913	3.34053	1.06905	3.18403
1552914_a_at	14.1488	5.30684	6.49838	9.02992	9.27757	12.7971	3.92312	4.33501	4.1617	13.6046	10.4997	17.8178	6.53749	4.58862	9.73102	3.76454	7.8502	14.19	5.88379	7.96944	5.75914	18.56	5.63793
1552915_at	35.6417	52.9923	50.53	27.7129	39.2718	39.8905	28.4472	25.0657	51.0523	34.547	41.3936	44.7367	18.9758	27.2579	32.2608	45.7341	38.7285	43.5898	32.6205	43.5757	61.8292	43.0567	46.3193
1552917_at	4.23409	37.0321	33.4834	4.08809	46.7382	27.2073	9.43029	14.4466	35.4979	6.82108	24.4083	12.3198	25.9523	1.84255	29.1654	22.8663	21.3671	42.2263	23.0647	8.21187	26.5564	14.032	33.886
1552919_at	46.0768	38.6578	66.4154	109.834	62.9602	59.0244	24.7196	45.4449	80.1252	76.3119	76.5473	60.0893	46.3838	50.5192	51.5248	61.5929	62.2611	48.8789	52.4765	77.5113	68.1362	81.1949	71.7096
1552921_a_at	251.181	332.334	266.216	269.991	324.661	281.082	281.348	256.268	226.1	213.162	225.839	207.685	274.855	268.503	265.8	251.737	248.843	270.849	221.756	193.184	265.941	241.03	203.507
1552922_at	3.94018	4.61757	4.53225	15.3426	12.9163	19.4643	36.6043	16.3951	48.8848	18.7374	33.262	24.2462	4.74913	21.84	4.28301	25.7558	25.8632	2.3441	5.50449	4.01122	29.5736	36.8041	34.5397
1552923_a_at	10.3592	34.6014	18.9507	20.2994	21.4237	3.70307	10.4355	10.0811	4.46672	11.2519	6.01522	6.91848	15.1768	7.77873	3.40734	27.8121	8.08813	7.16454	42.8415	29.6731	5.94521	12.8308	4.41804
1552924_a_at	65.0631	46.6623	77.0738	88.0706	16.8153	67.7139	112.818	77.2701	124.053	184.877	154.877	106.405	69.034	75.1507	80.3435	64.8656	68.4399	127.772	33.1489	20.6276	62.319	96.0445	86.5019
1552925_at	24.2293	47.1905	30.0622	23.6041	44.7463	10.6879	14.2049	21.3033	30.9056	45.7569	43.7304	17.8521	15.1654	47.7254	40.41	28.0443	48.7255	35.6434	4.81849	46.7257	32.0986	5.68393	13.9847
1552927_at	91.5368	76.3949	103.261	95.6114	83.3215	48.3987	75.6793	95.3878	68.6126	66.3062	77.3814	55.4884	109.044	98.8728	90.8229	62.0396	81.292	103.347	114.642	98.4312	163.716	94.3126	75.9207
1552928_s_at	86.3756	121.947	79.8461	121.113	80.1782	90.985	87.1767	88.4789	113.959	84.9986	72.2535	76.0916	146.429	129.342	103.848	113.002	104.774	91.837	154.343	144.575	151.407	111.747	119.458
1552929_at	28.9869	2.69106	1.2131	2.23329	31.3374	4.58737	23.0587	26.593	7.58555	3.1652	10.8	9.50048	30.2287	5.67873	3.83114	14.1309	1.36235	2.57386	6.5707	19.5056	4.24991	3.61306	2.6874
1552930_at	90.2373	109.9	159.204	59.8034	105.861	127.601	66.223	84.8975	102.201	109.978	102.333	114.436	118.829	126.183	147.61	111.686	101.917	118.972	67.5835	109.24	66.5049	110.605	114.092
1552931_a_at	242.873	179.935	190.462	229.29	191.814	214.651	154.165	199.626	199.22	354.988	454.861	331.667	206.277	220.022	189.063	192.559	189.237	212.954	183.23	221.786	158.428	223.872	212.995
1552932_at	2.03776	7.79226	4.04383	6.7953	8.89544	4.9066	4.42691	9.79117	23.2139	5.01634	2.28277	31.1873	23.5704	6.1326	7.86645	5.85828	6.80516	4.36369	5.57625	6.10531	7.3502	16.9664	2.5967
1552933_at	28.2398	37.4138	26.3656	23.311	43.8277	30.0213	0.933212	22.8523	1.2905	5.18337	35.8214	16.1539	23.8432	19.1663	37.9093	12.5264	13.196	31.9814	18.8157	3.98723	13.6891	1.02537	32.691
1552935_at	127.047	137.374	186.571	57.6123	76.335	235.377	154.954	99.5351	100.895	86.0036	99.9931	42.7575	149.808	106.084	158.246	96.7349	217.025	131.485	134.569	87.7762	193.39	192.037	104.042
1552937_s_at	392.479	320.519	329.193	485.333	384.653	387.779	354.456	342.481	248.378	312.804	361.517	275.602	345	323.681	401.747	433.915	417.007	367.966	292.523	266.438	290.318	401.508	309.395
1552938_at	33.5566	8.39907	26.906	9.36391	38.3574	2.78445	29.6451	31.0862	26.4762	38.0375	19.6147	19.2757	22.3108	42.2822	40.6628	27.6105	11.003	29.0214	50.3949	18.7976	29.9359	4.85608	35.0368
1552939_at	7.79229	20.8202	16.5025	11.8125	26.7749	4.07646	7.66515	9.07389	30.3594	5.64757	10.4288	13.5783	4.92133	1.57285	25.5977	1.67143	2.87666	20.7707	1.82211	24.8346	15.3898	19.1119	29.1818
1552940_at	35.1922	34.6833	26.1739	38.1693	15.7657	35.7718	21.7946	18.2099	31.6448	17.4893	21.7729	26.263	29.1408	26.389	52.2785	35.2591	45.1478	49.4723	14.6597	47.1076	33.3738	34.3584	26.1481
1552942_at	57.1615	81.7729	40.5286	63.2588	52.4044	39.2296	38.8996	51.3512	57.7346	65.4369	38.4117	43.4301	60.8998	54.2843	50.7425	45.1463	64.3815	56.3933	46.4638	46.8023	35.343	51.5215	17.0506
1552943_at	22.4103	28.9604	25.2871	10.0197	20.1338	20.2345	36.3663	2.6424	22.6311	33.0746	22.1823	27.4244	31.9127	15.6327	8.30267	13.4842	20.0039	14.2411	26.6857	19.938	9.86319	2.45729	11.7858
1552944_a_at	36.3461	14.9914	19.4569	71.133	22.5802	17.0137	36.3045	64.2007	33.2463	29.5034	10.2782	34.8868	21.2354	19.7597	57.8251	17.0769	17.1532	17.703	16.4273	17.8359	10.8547	17.3432	21.911
1552946_at	43.8054	66.738	51.2131	53.8538	74.1403	63.5207	46.591	43.8634	48.3003	35.3554	46.9028	25.1908	70.6724	51.4468	45.4458	43.5443	58.3743	37.3553	56.2305	42.8899	58.1882	38.843	39.7431
1552947_x_at	68.214	60.4985	66.4682	62.3957	64.0038	74.3029	49.6739	58.6292	37.4879	70.2745	39.6343	24.265	44.2678	46.4224	57.2718	47.6829	49.765	54.9689	66.0988	37.2805	46.4361	53.4532	34.8737
1552948_at	4.53044	8.31467	5.01857	7.84311	5.41377	4.96717	7.60147	4.77082	3.02507	25.0058	14.8122	7.69348	7.27304	5.56201	6.21025	11.3384	5.29303	5.71098	6.20379	12.6269	2.12281	27.242	45.1327
1552950_at	17.8102	18.5078	20.1049	14.688	12.9194	19.0923	25.1193	11.3144	21.2178	11.797	3.57207	29.9018	7.84349	26.5945	2.39745	14.7843	38.9101	22.9486	7.47312	2.50573	3.56735	2.53484	17.4902
1552952_at	33.6272	44.3173	37.7618	26.5375	42.0304	28.2295	28.4638	27.1212	32.721	28.1469	29.7154	36.0048	21.8442	24.0823	38.2062	35.9413	31.7972	42.4327	28.6991	37.8625	40.1423	30.0118	37.6438
1552953_a_at	18.4258	66.0924	25.7947	20.0362	71.1553	28.2141	45.3238	29.8139	44.7964	65.8891	62.1746	65.7964	47.2435	16.9809	36.2935	35.2105	63.9776	42.4711	5.28732	5.1741	41.4171	40.5051	16.589
1552954_at	29.1149	40.4541	29.4272	56.3993	50.3513	38.0703	25.8821	27.5519	37.0312	9.73879	11.3211	21.965	35.171	30.627	55.0973	23.5039	6.81632	41.7303	63.1148	30.3944	38.9567	27.6801	41.9344
1552955_at	35.9512	29.4201	46.4546	32.1033	36.5027	47.1237	17.4463	14.5354	53.4466	36.2748	49.173	35.5158	23.7733	22.2379	4.86384	53.059	36.7866	52.1903	38.6943	9.11391	30.614	24.8837	39.6938
1552957_at	34.5174	10.8625	4.79412	5.72932	28.3491	2.15861	19.0859	16.2284	6.20655	31.9715	13.1633	18.3709	33.7915	19.2671	4.10391	23.768	45.4455	4.4498	6.14742	32.5676	22.3024	3.64416	17.2376
1552960_at	42.3749	88.3333	29.8874	8.63391	51.4111	64.8886	59.3495	61.4861	29.9757	45.7608	5.95426	94.0997	45.4209	10.2304	21.5978	54.8978	58.2711	61.7065	8.50623	46.6827	16.1298	26.5896	32.3882
1552961_at	6.68054	12.5541	6.91984	4.63354	2.82793	7.74906	20.3777	26.0314	4.12795	4.07062	2.6741	20.0628	4.8566	11.5851	14.1883	9.94649	4.94143	4.99822	5.79551	25.7031	3.13739	18.8174	3.67781
1552964_at	5.35826	39.9503	9.31711	31.0015	8.39092	7.20187	3.31755	33.3547	42.1995	9.33888	7.28602	51.4501	10.0228	7.60579	10.6443	7.39157	31.9105	26.6114	43.9359	2.59148	4.14621	29.6797	37.7218
1552965_a_at	13.7156	20.0589	13.6804	33.0478	54.1561	39.4078	16.0013	7.50232	9.93953	2.37367	37.3556	19.8434	21.0127	33.6919	33.9695	6.33734	7.08825	4.0453	26.0961	43.3791	13.8534	2.52474	36.1553
1552967_at	30.4112	34.2854	39.8426	29.0201	46.7495	62.1105	34.4439	22.9652	56.185	50.7026	57.7124	88.6134	51.7208	41.5722	48.157	39.5289	46.939	81.6756	44.7461	64.0596	56.5486	43.872	65.0341
1552969_a_at	29.7725	8.44739	37.6779	23.2578	71.5891	63.105	73.6737	42.8586	36.4948	42.8189	24.4165	42.3605	99.4854	69.2068	43.709	47.3442	60.6016	37.8241	50.2692	50.776	20.4265	49.912	53.7809
1552970_s_at	68.7584	60.2083	46.1724	44.7921	43.0228	52.3144	65.4464	55.5391	64.9935	63.7653	22.7854	60.1494	90.8013	57.5276	64.2441	60.4969	53.8555	51.2329	73.9516	71.1359	68.8594	38.9155	67.4982
1552971_at	3.8631	22.6689	4.09299	1.60743	17.1732	18.6489	24.1064	3.30173	18.5311	1.05816	8.27614	12.1476	5.17293	17.1481	4.52732	23.2189	14.1739	1.34484	11.8977	12.1665	4.35918	2.95868	9.56424
1552972_at	138.532	131.562	118.508	24.3989	18.3048	2.6325	162.996	163.472	228.398	0.90604	10.7938	3.11145	175.254	233.421	182.425	34.8846	34.6244	31.5338	266.36	274.076	290.455	67.7411	36.5787
1552973_at	4.6838	2.32955	6.58095	3.73286	14.2309	3.1954	5.03838	3.58034	5.18448	8.3109	5.10674	8.03772	17.7545	1.41219	1.67448	16.6504	6.90007	9.92575	3.06093	7.21873	2.42366	6.6678	4.20819
1552974_at	12.2531	12.6611	8.86664	2.57378	10.336	2.66771	6.10749	11.7677	25.0231	1.72275	12.253	7.00796	21.2047	12.037	15.0443	21.5643	11.2098	2.74539	23.1211	22.1248	1.88909	2.6224	15.3752
1552975_x_at	61.9046	40.0006	97.0957	33.4122	61.7029	66.638	77.3999	55.7259	49.237	57.7696	44.453	29.8516	57.026	64.465	38.9172	38.2734	47.2942	53.8364	89.6646	63.0894	39.3272	50.7381	43.7317
1552976_at	57.3419	107.656	60.8447	37.3385	60.9184	37.879	70.4049	58.4606	66.7232	38.6131	54.6338	97.3168	66.3517	35.422	37.112	44.7623	45.0459	75.8031	9.07518	38.2653	71.1304	70.0338	63.6492
1552977_a_at	560.996	405.972	599.469	530.908	565.113	585.073	431.499	538.498	564.464	482.775	538.539	500.264	443.123	445.688	388.329	481.598	468.333	523.075	431.709	467.473	405.131	476.286	389.615
1552978_a_at	785.986	719.352	858.668	842.325	837.218	695.689	709.635	672.585	734.692	731.18	796.146	759.836	737.709	789.056	840.584	838.924	776.986	738.978	663.741	640.592	665.143	801.436	788.127
1552979_at	39.7477	17.5833	19.5344	22.9672	32.423	5.88433	29.9654	2.56809	39.4372	5.16191	12.6941	7.08856	6.38299	3.85473	18.2854	47.0537	17.2761	5.89077	3.67966	2.61844	3.89628	9.36509	4.57384
1552980_at	74.1012	109.774	64.7127	56.4089	45.1703	55.2064	40.6803	18.3787	58.4301	66.952	43.2921	42.7213	64.809	51.8716	49.0599	40.1967	64.1397	46.8393	73.4705	69.2921	41.1561	54.8959	73.8743
1552982_a_at	14.1559	28.0591	4.67653	6.27443	6.16475	24.1618	4.00162	15.6474	8.51248	15.1501	5.17196	6.90314	43.9105	5.90598	30.586	15.198	20.4179	4.39227	4.06494	3.58663	15.3706	8.4201	4.63647
1552985_at	47.6209	50.7793	50.7881	46.188	65.3228	40.9959	41.7979	62.7083	74.9863	34.5658	49.288	64.9425	39.1779	49.4087	36.9447	53.2487	47.1318	67.0376	56.8316	47.0566	52.5345	54.1464	64.4492
1552986_at	143.374	128.27	100.923	102.282	96.1411	109.959	104.508	106.026	113.022	93.5427	99.3193	100.532	102.162	104.41	78.4774	119.43	99.6186	112.669	99.9106	70.7937	125.48	115.233	83.3155
1552987_a_at	15.2863	2.22074	6.40038	30.5355	19.1837	8.53047	17.2873	32.4851	18.258	13.2429	1.40605	18.4688	16.749	3.67747	1.96824	19.3098	1.96916	20.5465	27.405	5.22489	4.42624	2.18835	28.5235
1552988_at	21.3937	25.8114	17.161	24.7422	32.9819	18.0286	14.4355	17.6005	50.4042	30.9163	18.111	34.8501	20.428	18.3853	29.3801	22.3679	17.572	33.6212	32.6672	40.5559	28.3214	25.3155	2.63749
1552990_at	1.79796	3.9193	2.5788	3.31557	1.71513	5.46226	2.69737	2.44594	3.88863	2.45563	2.6699	5.66681	3.51715	1.55882	5.3419	3.0781	1.92061	2.22815	2.48763	2.61499	3.58848	4.24948	5.8961
1552991_at	45.8948	70.9501	43.4966	6.32822	50.9837	40.3049	49.7563	23.2944	25.6814	42.4622	52.1295	53.122	24.9959	40.0341	42.2947	17.1664	24.4558	50.1423	31.5656	52.2326	46.8969	37.9427	56.7366
1552993_at	0.938967	1.73963	0.6432	2.11801	1.34163	0.536829	1.11495	0.55808	2.43755	1.51735	0.606625	0.889617	2.46621	0.901079	1.91415	8.31444	0.826757	2.66528	1.9501	0.895483	1.82013	1.11329	1.31933
1552995_at	26.692	39.8746	11.0263	40.8999	76.5228	3.41955	16.6218	24.5956	11.2033	15.2559	3.85749	42.1954	13.9632	11.8909	14.4162	39.9343	14.9178	74.4009	10.8807	3.19202	12.3367	4.93117	13.0569
1552997_a_at	22.7927	33.7335	34.1712	8.95282	34.4696	34.7645	5.6006	30.9122	27.4024	20.6712	8.83995	61.043	47.9096	48.314	36.8284	36.9397	10.1989	30.5321	13.0561	4.11346	44.7757	27.9159	33.9658
1552998_at	5.11527	4.36709	3.97678	3.54055	1.91075	3.42335	1.25835	15.6302	1.81666	3.92762	2.58081	4.68607	3.60388	1.90765	5.64522	1.74207	2.03879	2.43197	3.71209	1.78907	4.30635	2.85775	3.70654
1552999_a_at	13.4543	17.843	33.8171	9.90645	12.1046	9.22047	23.9138	21.5729	32.6367	18.9615	4.97587	25.1801	16.3953	26.594	5.78169	21.389	4.0399	35.614	27.8483	3.90671	35.7086	22.5205	28.8399
1553002_at	5.62327	42.1736	27.8763	28.3936	5.25897	40.0551	32.0934	8.29089	55.6854	46.5186	31.3448	18.8576	24.237	33.3015	17.4699	43.027	34.6498	62.439	28.3567	31.9958	14.4455	18.2414	23.5493
1553003_at	41.9585	71.2772	45.5058	37.773	36.1619	27.9783	48.2715	39.7041	53.0382	42.6149	32.39	39.9644	38.1181	3.06055	70.0743	56.5014	51.5526	77.7142	51.6059	54.1105	39.0076	54.726	58.5878
1553004_at	43.5453	39.6156	18.8994	11.3417	29.0086	11.2854	2.60924	9.01219	5.31236	12.2004	5.68526	28.9027	5.71187	14.7037	14.1291	15.8789	22.3078	22.0745	3.86327	40.4549	14.9305	5.9164	6.76384
1553006_at	14.4483	2.3894	34.8664	3.28337	11.5336	2.07769	10.6761	2.09697	1.94985	13.6213	1.58723	1.46928	4.21591	1.5785	2.48814	1.78978	3.04931	2.3363	3.92818	22.2519	2.8257	1.66475	28.6283
1553007_a_at	30.0831	19.8357	5.01963	4.59466	3.23862	4.43336	21.8905	14.2794	16.2755	7.91614	3.49549	4.67011	3.41112	5.06077	5.67524	4.01232	2.05653	31.5291	1.97237	16.1696	1.95422	9.32076	6.46916
1553009_s_at	9.20491	25.2327	22.2818	19.5366	6.93333	15.5529	6.98007	42.4431	2.3687	3.62978	6.95035	19.7555	7.75229	2.74175	5.96813	2.95833	7.79843	5.93441	3.65172	54.7239	3.3563	10.0658	3.34157
1553011_at	49.109	40.0387	48.072	9.22932	37.9717	47.9169	22.725	37.3785	10.9389	46.2151	20.4659	53.9533	4.99863	31.6272	34.2925	37.0019	22.2409	26.1114	4.61773	3.30013	53.0436	9.03672	2.03868
1553013_at	14.9219	29.8558	13.6961	4.24446	28.3717	4.66962	4.93831	14.7496	3.73563	23.8171	3.17061	3.4739	3.85357	2.83288	14.788	4.28771	4.23473	29.9818	5.22944	3.23722	6.25735	18.5536	20.1341
1553015_a_at	443.038	540.526	576.979	444.711	600.328	511.055	429.331	470.906	450.726	440.544	503.488	505.961	476.205	406.191	506.742	563.551	416.494	654.865	523.709	432.881	443.022	441.896	425.621
1553016_at	6.94489	32.9489	43.8675	10.5613	51.6485	53.9462	36.1278	13.361	28.7792	40.1976	6.05942	15.6489	28.228	2.84511	38.3787	8.59038	10.6213	62.05	66.0378	13.2054	55.1824	10.0044	36.915
1553019_at	44.8412	96.2587	56.991	25.4735	53.7941	83.4644	54.1499	72.4693	66.3639	66.7642	29.6025	49.1424	25.4736	52.6619	100.415	64.3125	65.7556	65.6073	53.7017	52.2392	72.4052	129.341	83.2316
1553020_at	37.0676	16.9306	30.4653	14.7449	3.34752	49.0851	24.2078	32.86	36.1142	33.1875	16.7429	25.5695	33.1174	13.9113	15.6653	29.2934	11.1179	26.9333	17.7466	47.3786	5.92731	16.8813	16.5819
1553021_s_at	124.553	174.715	150.014	104.132	123.07	52.19	141.131	188.527	128.931	57.8187	84.6283	64.2751	81.7679	110.755	58.2488	65.7308	86.1001	58.1923	137.786	107.175	115.396	103.206	70.0986
1553022_at	36.7881	25.6454	23.7059	25.9339	10.7654	18.7962	8.32801	35.5887	23.5176	12.7424	28.0746	11.5609	17.7257	14.9928	22.4673	17.0304	15.2126	4.6416	15.9363	1.53319	10.2349	17.2541	3.3935
1553023_a_at	54.0315	47.0903	77.6577	66.7852	96.2722	85.8443	69.6111	75.5191	69.8802	73.4853	46.358	56.8294	54.7461	88.6402	82.8209	79.9687	86.8008	97.2131	53.3557	61.7409	59.2247	51.4884	63.6584
1553024_at	1.53756	4.97882	6.46442	0.614241	12.314	1.51981	9.91308	5.59135	1.5607	1.66949	1.2103	2.09578	0.922886	0.457503	1.88517	3.38118	6.53535	9.5839	9.0235	2.25619	4.58023	8.49228	14.308
1553025_at	6.19086	33.4369	3.17707	35.834	31.7711	16.3619	28.2183	23.5784	18.1247	13.0679	17.9863	5.56651	10.3714	29.8219	15.1681	2.35279	20.789	2.85195	11.2631	10.3778	14.9003	13.8585	14.7422
1553027_a_at	12.967	18.3846	13.0645	10.0606	16.0978	20.6398	12.6367	14.8047	9.26047	11.7004	8.32903	14.5011	10.6045	21.1723	8.39482	18.1574	34.2448	76.9359	35.7304	15.892	47.595	22.2393	18.5749
1553028_at	14.1506	31.0195	26.7002	10.7612	6.19969	2.40663	18.0774	8.15595	32.1836	44.85	21.6771	51.3652	9.02327	6.51302	35.3732	14.77	6.96897	21.6944	27.0198	14.7011	9.25943	6.98864	8.93273
1553030_a_at	132.283	166.453	152.992	184.125	181.066	154.387	128.803	110.9	135.982	153.406	102.093	134.217	218.359	160.731	203.97	127.086	159.117	183.044	150.68	153.559	139.911	123.758	172.335
1553031_at	83.436	101.781	64.258	69.9633	66.8885	51.6984	68.2541	59.1901	71.7281	57.3223	68.0951	49.7239	75.0294	89.5729	82.0273	83.5203	53.6597	70.2683	87.922	59.5043	105.704	110.585	96.7126
1553032_at	24.2155	7.58824	7.86151	5.43087	50.131	9.87418	6.6351	57.664	4.87001	6.9751	3.68968	3.16712	8.71431	28.4723	47.3979	20.3725	9.59851	15.2245	5.44628	46.7868	8.43331	9.73652	6.65652
1553033_at	3.22835	4.13227	3.94264	2.87081	10.1696	14.4322	3.23255	6.19624	3.46759	2.89378	1.08899	1.62813	17.5534	1.87614	1.88709	1.72422	3.4006	16.0077	3.35817	2.16193	7.83549	14.1919	6.75045
1553034_at	251.551	250.807	278.174	507.577	543.492	488.113	266.948	225.431	257.39	762.146	794.998	794.014	204.74	195.591	220.59	434.358	496.982	425.099	224.557	185.419	166.652	503.246	430.145
1553036_at	1.40577	9.86677	6.71145	4.10421	4.066	27.3373	5.14378	3.24816	1.81506	10.0054	4.85197	4.67324	3.42007	9.16611	3.40425	1.6381	23.6678	1.5694	15.8635	1.2479	10.8384	0.982913	6.97642
1553037_a_at	21.9629	30.8446	29.7754	1.28983	26.454	7.20632	24.5103	33.9633	8.36249	15.9776	22.8186	18.3475	10.4138	16.8342	10.6716	31.4036	17.6258	21.4176	27.2873	34.2886	14.8586	12.531	20.8641
1553039_a_at	19.8677	25.9611	18.6316	14.9192	16.146	19.1711	13.5191	16.9837	22.7341	21.3397	24.0554	23.3347	10.0905	16.3926	19.0579	16.0577	13.6079	21.1148	11.9899	8.59425	13.293	16.2474	34.4992
1553041_at	6.81258	6.34362	5.33908	4.35567	5.95402	3.61787	3.27753	5.36381	4.19199	6.88074	3.63777	4.08658	4.34837	2.95657	7.55672	7.20184	5.52386	4.51055	5.93721	5.63163	5.89829	5.70984	5.77152
1553042_a_at	49.7912	86.6077	58.0019	58.9139	72.1902	59.4808	67.6511	48.2498	30.3422	33.73	15.3885	107.924	83.4732	72.0088	10.5465	73.3934	10.0932	57.3736	50.7643	50.2618	44.2552	55.0385	91.1298
1553043_a_at	11.5549	11.1986	54.6126	23.0512	34.8038	7.76253	51.9883	22.4504	31.8057	38.8081	17.045	43.7403	48.9856	13.8968	11.6317	17.7604	62.9151	46.9634	30.1849	15.9848	38.5338	41.0572	29.4837
1553044_at	37.0416	32.4693	28.29	19.7304	29.1242	11.5969	30.9123	10.7666	13.6609	41.8322	30.8632	41.8397	6.73873	36.9784	33.5056	12.2144	54.3586	45.0372	26.8229	7.30778	26.9422	50.7339	42.6999
1553045_at	5.24261	2.53706	9.13717	6.2818	7.34659	11.1547	2.07482	2.21742	2.15563	5.48291	4.33497	1.5264	29.7946	7.94977	4.11639	2.61985	3.87446	7.79817	3.16111	6.3655	2.46084	2.55616	2.7541
1553046_s_at	38.0124	18.2628	39.9098	27.3735	14.3608	12.2181	9.25856	39.9493	27.1733	54.291	48.1931	64.6532	28.9957	17.5307	18.0802	43.8599	13.7429	4.00393	28.0777	18.2055	23.6257	83.6099	16.0102
1553047_at	122.88	119.317	106.156	119.563	81.8185	122.946	119.99	103.71	160.482	134.415	108.57	93.2188	108.418	114.445	99.3059	138.645	128.792	113.417	104.339	116.912	116.046	113.534	108.686
1553048_a_at	119.628	101.958	122.937	133.066	154.04	129.884	111.118	117.781	133.479	130.83	128.935	139.892	103.923	107.235	96.9699	136.222	128.587	121.767	132.577	103.336	94.3778	86.7412	105.464
1553051_s_at	21.3345	9.0191	19.2336	40.9357	2.70076	18.9543	17.2182	6.56912	25.6566	24.0052	2.84337	38.4027	12.0841	20.1924	21.2926	12.6782	6.38558	29.4083	16.6223	35.5097	6.41246	11.9976	32.6437
1553052_at	6.06303	22.5235	16.2032	21.4819	4.04479	4.37459	2.09903	3.04881	3.14116	10.9823	8.36385	28.9987	15.8767	9.37248	10.2749	13.8675	24.2887	34.6486	21.3316	4.04099	12.1618	4.78875	29.4064
1553053_at	8.49095	4.27007	13.086	2.59645	7.25833	9.32215	4.98264	6.25177	1.88057	2.29932	4.67754	9.19674	8.66622	1.96767	6.78672	4.45614	1.97563	12.8262	3.99272	4.14239	2.56491	2.00785	4.74509
1553055_a_at	109.213	105.444	117.304	119.719	113.597	105.889	134.259	123.845	81.8959	167.871	204.712	192.571	145.948	100.536	110.479	131.716	176.775	135.787	120.619	106.494	107.33	180.898	178.024
1553057_at	4.6381	7.74148	22.163	3.69788	7.4315	15.5725	18.9991	2.72013	7.69489	46.1071	27.1977	8.19362	19.2422	5.33292	13.7896	10.8487	2.09332	19.1784	22.648	44.5064	3.75422	27.7411	8.2638
1553058_at	43.0961	28.3147	46.4486	59.8391	42.9551	35.3679	29.0077	12.2117	58.8608	40.1112	32.4682	56.0899	15.5422	29.1272	39.7412	47.6807	13.391	39.7565	47.8763	54.3503	28.1485	43.7519	45.7111
1553059_at	4.75715	17.7944	20.8668	1.95525	7.6768	31.3076	17.091	4.17136	27.6192	4.72371	2.49298	23.0004	5.79899	10.9779	19.2982	19.082	3.15653	8.31109	9.01584	5.59185	9.24987	27.5361	5.4141
1553060_at	59.278	56.2772	77.5176	41.4967	61.4337	28.2807	74.3811	42.8095	72.6488	57.769	62.0185	97.6596	53.0481	86.6671	80.8641	37.3013	42.0754	80.6075	70.1596	76.6583	85.9397	66.9462	52.9521
1553061_at	2.44363	2.46512	4.00147	3.71593	2.57276	3.61451	1.77658	2.36219	2.3328	1.99823	2.86344	1.8164	2.58284	3.58548	2.86765	2.06618	2.71362	2.7441	2.38255	2.19708	2.64023	2.64491	2.37417
1553062_at	34.9752	45.9533	40.033	35.628	9.09478	32.0673	26.9575	4.30092	4.80364	12.6213	24.3508	46.5052	7.85914	46.7243	85.7676	32.7498	65.5544	55.0909	21.0884	22.2839	24.8097	47.4881	9.31606
1553063_at	34.1408	106.281	53.6259	25.1316	58.1273	75.0069	53.8366	66.3196	92.9556	76.6374	26.5837	73.1233	69.7945	48.9802	63.3319	51.7134	69.1303	36.9987	33.4793	53.8096	76.6385	57.5914	40.257
1553064_at	2.55008	12.6358	36.96	11.4517	5.51452	6.86097	8.44908	9.70345	4.43567	60.8235	35.0054	32.4417	33.2056	7.6297	10.5777	9.3404	6.71421	43.831	6.44571	7.82402	11.2503	57.3325	10.6703
1553066_at	22.3825	35.6942	36.7853	56.4095	25.0069	69.7401	25.8146	27.7567	75.1788	16.4218	38.6715	41.5406	40.6792	14.7244	17.4751	47.7738	32.682	59.4668	9.88096	34.2134	35.8858	56.4997	39.7819
1553067_a_at	24.8074	14.779	13.7787	37.7427	33.4976	62.4932	50.0488	9.63916	45.9279	6.87417	46.9823	8.6048	12.0791	10.3487	25.033	28.6333	37.9468	6.03678	17.6571	29.5776	29.7254	14.0842	4.35675
1553069_at	5.32941	12.8818	5.58421	3.38136	10.5564	3.99604	8.68922	21.524	3.91307	6.77225	3.98167	21.1827	2.93143	8.21639	33.7927	5.69968	13.6854	5.19621	19.3614	4.11046	11.5666	6.11938	5.59704
1553070_a_at	27.7735	64.299	21.5763	26.2439	27.983	64.5868	31.591	49.8087	5.02557	39.8536	40.6288	51.0495	31.3511	36.1132	46.0131	27.8036	34.2085	80.3135	7.35635	47.5278	18.0295	24.773	44.6255
1553071_a_at	38.0756	29.9231	3.60228	22.6251	1.91289	31.2375	12.2027	20.2904	1.97996	20.367	40.0922	9.62775	22.6648	3.79205	10.702	25.1311	1.5137	11.0885	27.1579	4.96751	1.55843	13.7772	7.45476
1553072_at	27.8052	5.22299	24.721	4.10771	5.02268	4.53885	7.22906	2.84763	6.32442	8.38034	7.44632	7.99922	17.4861	2.44079	2.51709	2.30637	4.43489	3.0715	5.24074	7.37634	18.6705	25.5504	3.98697
1553074_at	20.3054	46.2399	28.945	25.5338	10.8207	54.0237	22.7857	46.7072	21.153	35.3835	16.3511	41.9882	42.5428	47.9582	55.5853	36.2738	33.8445	20.3402	31.8453	34.4324	41.797	36.9561	63.3756
1553075_a_at	2.23053	2.79284	21.0365	2.48141	11.9989	19.1751	14.711	3.28603	12.0899	11.7585	4.14653	15.3916	2.13167	4.4017	16.9636	12.2049	3.66967	12.3238	15.9666	9.59779	2.42203	15.56	20.575
1553076_at	2.69112	18.4371	2.0841	1.95522	5.28424	2.83216	5.96019	3.65339	3.42201	2.97118	1.68501	3.05653	5.74152	2.35874	22.8135	2.60265	1.92695	3.46554	9.78126	8.01454	3.60498	3.35532	14.6554
1553077_at	10.4129	5.28627	6.26922	6.03692	11.7576	24.7834	5.17886	6.21252	30.3986	2.13848	16.2386	1.86909	3.42296	4.46764	12.6693	8.67599	4.23582	6.08355	1.64237	12.7214	15.3742	14.4278	29.5161
1553078_at	26.9111	49.3184	28.5676	5.06208	20.7993	29.5396	9.79037	18.1194	13.203	9.74799	10.6906	21.2946	22.9543	10.2394	43.2408	8.08945	3.00249	10.8813	11.6893	16.0163	10.8062	4.9355	12.0517
1553079_at	13.6845	20.4118	52.8273	34.0636	14.373	31.3449	19.6342	37.2118	36.287	136.461	121.165	121.734	4.58838	17.6515	11.6464	27.8293	9.12232	45.0041	22.9992	4.27513	13.9673	18.9096	15.4933
1553080_at	42.9107	77.6389	24.0019	57.9794	54.0105	23.6119	39.417	62.5031	24.566	25.0291	49.699	42.8775	28.789	58.1498	20.8952	40.1973	45.5264	39.2201	33.1765	58.5	110.723	29.246	16.312
1553081_at	32.3521	84.8436	62.0826	85.9048	104.818	118.409	35.5894	59.728	45.1976	98.582	69.2581	58.571	44.8114	57.9893	54.1879	66.1571	122.293	108.248	59.1709	28.7068	41.2439	119.706	147.895
1553082_at	15.3505	4.19776	4.56428	6.45893	22.1044	2.38617	2.68594	5.76854	3.44466	5.23776	12.4316	16.351	2.09388	6.11119	11.9867	4.22808	1.76422	10.8983	3.60234	4.88863	3.98767	1.28682	28.1469
1553083_at	41.3975	55.3242	63.053	19.6901	28.3354	43.2141	43.0714	48.8559	53.7892	41.116	46.3794	60.6649	38.0041	40.4404	65.7801	49.339	59.3964	60.7446	47.3929	26.0164	43.3101	38.8517	47.9871
1553084_at	16.5055	34.1157	5.81422	28.7855	3.98821	14.439	18.0035	35.8762	11.0324	6.32452	21.5465	29.2929	15.235	1.96736	12.5698	32.3301	4.58575	3.78054	2.61838	4.89575	25.1702	15.5536	20.7598
1553086_at	5.66127	14.2533	34.0486	16.9862	4.95381	13.336	5.66593	15.2238	18.9917	5.98081	25.9961	20.2116	20.6885	19.9526	6.82012	23.7753	9.79255	28.4551	5.10817	40.3722	20.0717	23.6116	5.18295
1553087_at	42.8101	5.06946	39.6915	50.4134	8.83537	19.2701	6.2277	4.67407	25.517	34.3014	26.6384	27.0281	10.8083	37.0639	28.5713	36.7518	28.7451	23.88	10.1237	22.5861	14.3765	26.809	22.124
1553088_a_at	79.3352	136.855	62.751	64.245	113.387	136.256	108.125	60.931	83.0067	145.757	87.2111	82.2423	62.2097	79.7727	84.0604	84.5144	49.4103	92.8699	55.1652	77.9614	93.3696	58.4327	58.7097
1553089_a_at	4.42903	9.68517	8.22053	20.9116	27.2202	11.4913	1.63023	10.8956	4.48273	42.696	33.2377	4.71325	5.85322	23.9273	57.3605	24.5832	25.7771	5.54742	8.15033	23.9872	6.77639	8.58501	8.57884
1553093_a_at	24.3961	6.33763	7.56627	3.06241	2.4669	14.2388	22.837	21.1487	13.8584	12.4718	14.4194	2.69913	5.78777	4.43179	18.861	8.64688	5.78533	36.7769	22.3173	4.37937	7.58487	31.3766	1.99447
1553094_at	9.72497	28.4103	33.884	25.5866	21.3943	10.9734	5.08849	38.3245	6.50203	20.4195	6.71311	21.4739	22.892	34.0966	6.622	27.1681	32.6313	6.6658	15.3894	5.45325	9.17156	19.1542	48.9339
1553096_s_at	500.974	463.532	551.423	520.845	587.986	644.974	569.661	561.482	696.255	895.247	892.102	947.821	481.025	511.93	520.11	565.013	578.261	569.377	536.031	610.854	530.386	513.47	409.895
1553099_at	123.035	120.018	121.732	255.061	202.929	247.222	133.868	117.438	127.907	248.92	233.3	208.787	151.104	144.748	123.998	249.619	237.156	222.439	82.1302	94.8729	102.512	169.718	195.002
1553101_a_at	1140.46	1118.85	987.427	1248.19	1135.8	996.377	1085.95	1132.36	935.4	1203.47	1241.5	1300.15	1047.81	988.863	726.212	838.033	936.098	981.981	765.888	599.506	842.377	747.462	901.128
1553102_a_at	177.708	175.281	152.788	262.418	299.32	327.724	156.914	194.171	112.02	280.959	180.468	207.329	93.8993	78.2302	64.4911	123.59	112.011	116.135	65.4147	77.7504	46.0601	73.7704	119.402
1553103_at	1860.51	1797.52	1888.6	1940.86	1803.93	1840.47	1640.21	1526.65	1651.34	1646.59	1671.16	1617.53	1860.77	1727.87	1780.1	1672	1678.75	1651.99	1641.85	1656.53	1454.86	1614.67	1459.94
1553105_s_at	1494.81	1365.29	1271.73	1554.38	1514.07	1576.88	1542.06	1348.37	1381.5	1851.38	1827.57	1494.55	1553.98	1421.94	1426.39	1632.22	1462.08	1388.62	1621.36	1562.72	1369.72	1513.41	1473.62
1553106_at	1979.45	1452.17	1385.79	1578.74	1285.24	1247.37	1839.05	1655.35	1643.65	1413.49	1369.15	1249.62	1440.3	1659.73	1427.13	1379.7	1177.25	1073.56	1554.88	1547.95	1461.07	1682.11	1159.78
1553107_s_at	892.956	826.2	912.202	782.678	766.03	649.466	752.959	955.429	826.452	734.703	769.354	707.817	845.096	698.618	697.087	556.277	623.256	636.959	665.95	733.702	681.956	661.879	562.426
1553108_at	317.714	433.245	345.169	221.807	306.879	240.839	290.81	307.241	344.464	289.25	386.494	268.807	289.858	278.614	275.74	234.219	279.852	306.67	285.019	266.509	297.165	291.924	261.062
1553111_a_at	409.016	475.131	393.801	398.993	478.976	410.834	389.918	362.378	353.748	242.846	281.427	338.8	541.944	564.552	469.186	377.306	437.239	429.828	382.886	423.218	433.202	357.221	317.84
1553112_s_at	236.186	281.13	245.881	263.985	262.791	263.765	339.799	252.178	218.822	218.514	233.339	202.678	289.702	286.398	225.579	257.724	243.032	299.592	270.759	178.258	253.998	322.718	249.881
1553113_s_at	1340.65	1095.85	1269.17	1370.46	1427.23	1243.63	1126.14	1315.96	1017.67	1092.65	1175.1	1145.95	986.133	1472.97	1453.76	1243.2	1071.76	1300.58	1427.07	802.628	1209.04	1621.14	989.046
1553114_a_at	130.151	155.357	69.2209	114.051	164.511	116.627	101.353	114.723	102.202	277.297	249.267	292.645	98.3425	135.355	114.613	158.369	208.602	193.79	157.256	129.148	149.174	193.615	193.81
1553115_at	14.9891	19.6397	10.3938	14.0674	22.4772	21.717	10.452	8.24401	8.85203	18.3211	14.8627	11.4834	9.42801	10.4254	7.11339	7.99872	10.2499	18.4279	12.4389	16.3055	17.1449	9.50037	18.7706
1553117_a_at	370.321	278.586	244.805	246.697	273.787	199.498	263.407	257.573	270.572	220.327	213.885	173.219	326.464	262.101	280.607	236.874	200.693	212.27	312.144	214.953	316.267	264.401	246.42
1553118_at	1221.9	1060.11	1117.09	876.946	1119.55	847.707	1037.63	977.625	938.804	833.881	771.266	728.527	978.681	1003.81	868.831	782.126	817.796	687.719	940.854	931.203	748.583	614.413	611.347
1553120_at	53.1535	68.9141	66.733	91.8754	85.7815	91.0514	62.2742	71.1751	54.922	63.9031	46.701	67.3972	64.4718	54.1394	74.8335	82.389	90.217	64.675	57.5831	59.505	73.4834	68.2068	58.1516
1553122_s_at	337.305	172.69	227.107	355.236	274.516	288.065	322.151	246.149	297.344	353.52	384.53	258.086	381.842	316.693	265.282	350.272	269.318	332.046	249.402	275.701	257.958	296.56	151.398
1553123_at	46.0038	23.2183	53.6625	36.7357	27.1785	6.03961	42.4757	18.0957	84.8407	54.4128	10.9556	56.2994	44.1034	68.4313	9.18685	46.6044	70.0122	70.2081	66.8192	42.2836	44.3816	15.5993	44.9319
1553125_x_at	4.16562	46.0026	26.1541	5.33543	20.2792	28.4073	4.97666	20.0054	17.5766	21.8386	26.2232	20.6995	38.4694	24.3615	48.7835	28.9355	38.4978	16.7935	33.7269	8.53208	28.7217	45.038	29.9709
1553126_a_at	4.94991	5.43472	19.1541	16.3297	27.6294	20.6879	28.2962	23.7265	15.5914	30.4296	31.6971	30.5871	23.1437	33.8255	23.056	16.91	13.8077	49.6705	29.5573	17.7326	27.1029	6.97766	23.3235
1553127_a_at	44.9668	45.2683	37.0452	18.9088	19.142	33.0591	46.7973	28.556	50.2201	34.9913	15.0319	16.8492	39.3151	42.2576	31.7145	37.2637	35.4997	44.7076	4.74015	22.7588	22.1671	6.18495	38.497
1553129_at	233.334	245.507	331.383	185.912	219.153	214.725	175.968	207.032	203.406	100.606	77.329	74.713	438.049	493.911	329.239	209.462	236.159	189.928	434.1	477.759	412.063	205.857	205.422
1553130_at	6.26821	15.2816	5.87849	11.8376	4.99834	4.87694	5.46331	13.8645	9.70939	10.7956	9.14762	4.20787	6.77447	3.85406	11.1482	3.723	10.0826	7.93359	6.37365	4.85295	17.2477	6.7884	15.261
1553131_a_at	27.4618	18.5933	70.1054	16.3337	72.0983	47.3291	54.5097	21.2039	68.8696	45.87	111.827	17.221	13.8238	46.0676	65.168	44.8428	28.4251	11.8974	24.6298	74.025	77.2144	91.0231	92.3934
1553132_a_at	167.712	132.299	133.975	249.016	210.738	199.834	268.809	175.187	252.722	376.203	414.332	381.045	245.631	234.079	184.259	161.831	193.801	177.284	231.272	206.911	207.869	199.267	186.614
1553133_at	102.369	57.816	80.2874	134.277	96.6052	124.214	104.529	87.3228	78.3156	198.525	138.039	187.207	108.859	105.167	69.1649	114.259	69.8738	67.4271	90.3244	69.9778	67.2327	105.999	97.3633
1553134_s_at	28.6554	13.6298	5.62216	36.6785	28.2077	43.9693	34.4253	43.2393	26.8007	26.1557	46.6473	38.0075	33.7712	39.723	27.39	15.0311	31.5623	28.0115	20.2061	32.7273	16.4008	18.5388	10.9417
1553136_at	140.013	162.878	283.587	126.917	157.697	175.666	70.7804	104.459	204.607	145.164	132.915	186.095	144.756	129.7	181.91	159.668	151.596	148.084	171.811	182.533	165.272	151.297	123.671
1553137_s_at	37.3686	55.2346	9.50263	37.424	12.8479	7.84444	35.8215	15.7671	28.6461	43.1703	49.8395	30.2051	26.6916	5.34059	6.83678	11.3763	22.3478	17.5006	23.3465	1.23376	37.8559	46.2543	3.9204
1553138_a_at	19.1513	34.329	29.1665	23.1721	30.5407	5.53079	7.36001	37.1375	41.1501	27.5835	7.26568	32.9821	27.9132	5.80589	32.621	9.26141	28.5115	7.59512	35.5455	24.5774	7.43541	24.0591	26.7545
1553139_s_at	8.62539	15.8995	6.48133	28.5549	7.729	22.9034	23.1831	2.56324	43.5256	3.05559	5.40951	18.6302	20.8374	16.8566	37.291	31.6174	20.2652	5.39714	18.2766	5.00591	29.402	28.9584	12.2607
1553140_at	59.423	76.131	62.0018	63.6083	26.1953	92.0244	58.2147	63.0522	53.2583	40.2093	51.0663	79.6605	88.2433	74.0113	85.9543	63.8655	64.0269	66.8338	61.6508	49.8404	73.4817	47.8502	50.9861
1553141_at	89.3664	61.1226	86.6686	78.8584	99.8245	60.6523	89.0128	109.6	86.8074	80.8284	85.3603	79.9505	73.4598	88.9596	43.6044	97.4478	92.8599	84.9251	100.979	71.8038	96.894	85.4862	97.6759
1553142_at	113.004	103.754	107.426	86.3676	109.067	125.584	134.148	118.456	168.278	123.722	141.931	131.341	118.645	128.247	146.302	141.328	145.748	131.939	133.086	85.6391	173.407	144.775	130.779
1553145_at	146.472	168.841	123.248	216.114	269.417	270.865	125.061	109.964	111.107	196.334	184.185	183.392	106.576	118.913	82.8151	193.005	200.194	196.443	103.114	102.053	83.5212	149.951	110.939
1553146_at	4.86253	20.2793	15.9868	5.13613	13.4092	18.5642	20.8616	5.22935	23.5382	23.254	6.01965	11.751	3.76552	4.82904	6.84511	5.51683	21.4598	17.8041	6.6503	3.8031	48.1876	8.91356	8.80058
1553147_at	2.23087	3.64262	2.52365	5.98622	5.2804	10.9726	33.3507	2.85856	2.76516	16.2775	19.6593	25.9114	7.68913	9.31856	3.84645	9.04797	10.8415	8.00461	10.158	13.7076	17.7307	2.27422	2.77144
1553148_a_at	258.87	293.233	270.851	237.423	188.72	217.458	210.039	186.538	208.051	228.148	236.431	229.698	178.673	206.737	156.796	191.222	226.317	207.827	170.189	199.437	169.129	211.309	147.216
1553150_at	72.0948	54.5211	39.2335	100.978	74.8482	73.3033	71.791	51.8066	61.9193	61.4974	45.8629	44.4121	68.7147	81.2416	57.8095	98.572	62.2288	47.0461	73.5721	58.2048	63.2977	70.4	83.3912
1553151_at	54.0488	70.9542	50.3637	46.421	64.4552	59.033	24.8273	55.3157	68.0071	54.5308	30.2322	60.273	55.2369	55.5958	69.2489	53.0489	40.6578	60.0607	58.7685	40.9418	94.1306	46.717	52.4502
1553153_at	48.1918	39.3281	51.5933	62.3949	45.3659	54.9728	71.8139	77.4054	56.9553	99.1741	50.8368	74.5239	71.9539	45.9404	76.2659	66.5027	63.8918	80.3572	59.833	43.9912	83.6364	63.3065	74.0146
1553155_x_at	37.4719	61.833	29.4765	76.6666	59.3783	64.0641	74.637	49.4658	53.7028	59.2693	66.2877	86.5564	58.1968	45.052	57.9159	47.8744	52.4126	51.164	40.4329	60.4169	89.3229	63.2615	57.286
1553156_at	42.8739	110.905	86.2013	80.5849	123.434	85.0859	103.358	56.871	109.538	62.2316	29.0706	77.6679	106.822	86.983	58.6259	103.463	80.4236	80.9483	120.863	72.5254	104.704	123.728	49.471
1553157_at	54.8445	40.9446	40.1174	37.6009	40.637	47.8643	39.1201	63.8646	48.8457	45.253	39.6746	32.5387	39.7581	34.1046	14.6507	28.9503	31.2896	58.5909	61.2929	28.4412	60.1431	33.4851	14.4817
1553158_at	102.801	69.4025	109.23	150.189	148.295	132.692	79.2862	87.6871	98.0765	181.112	188.075	133.38	90.5962	58.1962	86.207	127.871	131.949	159.246	79.188	82.3774	74.4104	108.34	132.502
1553159_at	27.0957	39.8538	9.75606	50.7799	36.5959	56.2053	56.147	16.9942	35.9598	33.629	6.55935	28.479	55.8107	38.0567	47.205	14.6522	42.2554	49.369	50.9191	30.4322	11.6895	48.4043	53.5095
1553162_x_at	299.159	401.508	309.351	392.117	447.765	355.808	336.834	298.354	240.656	376.495	311.846	424.776	344.894	377.357	321.726	355.341	316.973	423.764	308.509	240.304	373.336	352.203	471.664
1553163_at	33.7521	76.9606	30.7374	8.41129	95.4671	53.7575	57.7671	61.3905	14.0041	86.2711	12.2662	22.5883	73.5387	63.668	14.705	39.5247	9.03494	42.4734	81.0842	63.8013	29.4975	81.7466	44.1983
1553165_at	103.95	85.6705	119.059	107.678	89.1299	89.2173	89.9234	107.483	93.5825	69.828	86.2158	81.7693	92.4334	112.214	90.2911	81.7209	66.5447	92.8291	94.9275	109.194	106.63	76.7837	100.999
1553166_at	102.019	163.924	68.8913	78.3227	94.7502	93.8071	63.7577	80.6883	76.2181	110.016	120.569	67.0459	130.458	81.2406	106.03	69.2423	99.0307	85.5184	92.9313	71.4373	149.111	129.606	91.1701
1553167_a_at	76.8881	118.024	101.249	152.28	161.824	243.067	86.1602	110.636	93.9845	196.91	177.379	174.716	91.5617	80.1394	127.89	152.089	148.475	159.288	70.2233	81.07	68.8537	160.178	131.062
1553168_at	6.86688	5.62201	6.46661	3.04534	7.52451	6.77315	2.90443	4.66333	2.51409	9.41434	18.2535	25.2331	3.39972	4.20069	6.6628	6.60529	5.90123	7.01196	2.86792	3.77985	9.3117	2.45924	35.4719
1553169_at	2.13921	4.44357	10.5862	34.349	5.14645	12.0288	5.61719	1.83177	6.5298	3.00863	48.1298	17.5377	7.53443	3.15387	5.42727	10.3443	11.0906	10.0487	32.7846	45.2349	14.9144	2.9178	6.88414
1553171_x_at	33.4845	48.8935	53.7743	51.6733	18.7468	51.9786	28.9263	57.0688	59.2094	42.1172	29.6459	49.2278	42.3672	30.679	61.0141	40.6907	29.1194	59.6071	28.8014	29.4878	50.5602	47.7244	35.2514
1553172_at	683.204	792.632	747.198	492.376	510.735	508.9	503.651	640.352	730.743	491.555	480.564	567.12	519.36	616.057	668.537	601.892	538.335	529.876	611.039	543.986	533.165	507.136	416.75
1553174_at	14.9397	71.953	88.4251	86.2494	62.6699	78.1445	18.0776	53.7204	81.9006	17.7449	93.5196	50.6977	14.6253	20.5433	22.3518	36.3121	30.6538	46.9621	12.169	19.9465	55.1375	69.6878	24.2131
1553175_s_at	43.6311	68.2698	32.965	43.3818	39.4234	52.1002	41.5118	38.5544	41.1993	29.7632	53.8571	43.5146	68.5596	51.5356	9.24187	54.7908	74.8498	13.8138	13.4675	57.9388	33.4137	60.3	51.2936
1553176_at	59.8247	57.5748	25.5574	32.9966	23.1942	33.6891	32.7872	30.8433	49.9098	52.8887	54.2092	44.1788	59.1374	4.41176	41.5143	40.3046	50.2152	31.2814	35.9131	31.2718	17.9313	26.3442	22.084
1553177_at	28.3725	17.3779	7.13803	4.3621	29.0124	32.7965	32.398	34.6154	4.98905	2.50198	2.41752	21.3916	30.0481	25.4064	25.4848	27.7355	9.92434	33.2393	3.15987	18.9477	31.6813	19.276	9.06295
1553178_a_at	60.8985	102.631	63.7415	28.9288	88.4344	73.527	38.2348	13.2129	66.4841	9.09653	37.3699	104.131	70.4187	27.5725	64.8185	63.9645	49.3785	67.9215	72.1941	61.3248	55.8524	67.0998	80.3926
1553179_at	21.1295	14.0578	6.93589	3.741	3.0514	6.55684	4.88831	6.06156	18.4468	7.54785	36.665	2.91732	2.36516	17.4591	5.60974	18.945	20.6332	7.71019	4.80719	3.9551	5.59382	8.15844	5.62823
1553180_at	23.2057	18.2422	8.61582	28.1668	6.1972	30.3475	32.0831	9.72683	17.0387	24.3765	37.7261	16.906	17.4941	3.29881	19.7337	27.1275	33.3966	23.3494	11.7652	44.3042	25.5598	23.7012	24.1402
1553181_at	48.9502	74.4081	54.5584	53.2631	65.4774	78.3765	37.1535	58.7871	70.0748	78.0573	60.2913	65.1509	64.3398	44.258	56.0929	51.8419	57.2899	54.599	58.6511	69.2866	64.1492	56.783	88.1699
1553183_at	23.5183	4.82812	5.03023	12.0686	4.57617	2.82124	17.2648	4.28863	3.23902	5.6453	1.47831	4.1109	5.1929	24.6989	4.19733	8.70979	5.28523	10.8256	5.25229	1.46399	5.39076	19.0724	2.98155
1553185_at	2291.16	1677.66	1769.88	2072.13	1629.31	2079.96	2310.13	2303.96	1578.54	1720.42	1585.4	1323.55	2006.04	1808.39	1757.64	1743.79	1801.75	1663.13	2027.4	2442.37	1469.88	1504.64	1520.2
1553186_x_at	2040.37	1453.23	1649.34	1200.97	1515.48	1959.94	1480.52	1422.03	1740.52	1310.78	1298.05	1315.12	1552.34	1925.25	1128.84	1833.29	1807.93	1691.65	1390.65	1552.97	1330.31	1727.71	1354.26
1553188_s_at	24.7448	2.66207	7.30653	38.4786	33.1628	2.43653	7.48461	20.5269	2.26799	2.05051	1.276	4.3423	20.8811	23.6007	3.96521	21.3802	3.57343	21.3331	10.7079	3.62848	1.70609	11.9376	2.16317
1553190_s_at	41.6914	74.6293	58.6742	37.2693	88.072	11.7737	81.4523	40.164	61.2521	14.9865	19.6112	33.0924	17.3979	39.5339	55.3942	31.1517	67.3023	57.9161	108.816	44.64	39.0692	77.3736	63.5664
1553191_at	24.4252	23.3779	22.2797	3.8535	37.5217	3.53283	26.0049	27.9576	10.7582	37.6536	4.11892	9.93353	25.701	32.9963	20.8937	21.6182	4.61254	4.31568	21.076	29.3845	13.7064	18.2375	22.9186
1553192_at	96.713	66.7969	66.2626	71.4609	73.3317	60.0886	94.3416	63.2355	83.0108	102.139	73.9407	56.7541	103.292	92.0972	60.2021	56.2935	75.0973	64.7987	63.7175	64.8994	100.245	61.9028	46.4821
1553193_at	60.3275	59.7633	58.5314	31.4122	45.7841	34.8202	39.0668	29.9945	85.0303	33.2999	60.1243	35.7768	55.6523	65.2327	86.3437	65.61	108.547	18.268	84.1365	64.5789	64.0616	80.1905	27.0762
1553194_at	62.2766	50.4668	45.608	72.0382	55.8195	60.6805	56.2762	51.0571	58.427	37.7426	38.5449	56.5419	77.1809	41.3404	60.3454	79.4084	70.1084	61.3039	66.6406	63.0552	75.8854	55.9412	77.1298
1553196_a_at	3.18086	7.21776	5.05091	3.39335	6.23476	3.36687	2.5849	4.39974	5.20325	2.74215	5.88395	3.10091	4.72621	5.51535	5.13332	3.19167	6.79072	5.39257	4.33271	3.55664	6.11447	4.25818	4.38683
1553197_at	20.1717	46.149	36.3723	26.8525	27.4572	23.4581	41.5285	29.0641	63.5502	4.71533	4.99135	26.3707	35.3971	31.78	35.3367	18.5395	53.4494	33.1584	35.0932	48.9282	36.6002	35.2244	23.1375
1553199_at	58.0999	32.8334	50.3267	5.38233	33.2058	43.8521	42.9041	28.4837	35.5551	20.0728	59.1623	22.2939	27.4757	21.4563	24.8062	10.4257	43.6519	52.2196	17.9915	26.8301	41.8362	40.6941	30.5076
1553202_at	2.11192	10.2956	2.56131	5.23484	2.16126	3.17333	11.5254	1.80392	1.33218	4.43477	2.879	1.71651	11.746	2.12924	1.29734	1.27715	20.6263	6.46121	2.4506	25.7328	4.51201	5.04001	4.87134
1553204_at	48.6899	54.4961	42.5544	23.9125	34.3141	23.3289	16.8778	59.4777	32.9062	33.8371	11.9487	21.931	30.9843	25.1561	44.1115	48.5734	34.8265	10.1156	49.4488	19.543	48.2671	60.4652	45.8939
1553205_at	94.945	66.8598	63.1166	32.478	67.7511	61.971	29.4617	76.0595	60.9928	12.9677	18.9935	15.2399	15.3212	66.146	24.5111	40.4105	32.3474	59.3251	79.69	16.3045	15.5788	85.8655	78.8547
1553207_at	61.9741	61.1559	56.771	41.3788	62.5551	39.8914	53.5953	64.6995	93.427	66.6793	74.6539	61.9014	46.2624	58.704	47.8979	55.5306	62.9584	65.4282	11.1345	67.0265	45.6751	85.36	84.2925
1553208_s_at	61.68	81.794	48.7138	50.1391	43.9178	27.7287	40.4053	30.7682	63.9376	27.2029	30.1087	29.3876	56.475	48.9741	41.7927	31.7504	26.5703	51.8785	22.556	67.1998	39.6941	32.7262	29.3265
1553209_at	39.9091	39.7793	35.129	35.9009	3.5039	47.2043	44.872	38.4788	39.8046	37.5113	16.8202	32.9683	29.8477	32.735	19.4397	6.28543	37.348	44.6838	33.6162	31.208	15.2391	46.6666	15.2461
1553211_at	4.48052	26.622	6.07051	3.56524	4.46087	10.1793	6.82032	2.29712	2.97223	9.21764	2.09543	12.9073	17.709	2.12049	18.1781	2.58414	5.66553	27.5734	11.9823	2.15207	8.58394	2.64777	2.86368
1553212_at	32.6511	62.9244	48.6775	67.7934	60.1163	73.3598	45.0653	68.6444	58.7117	43.9699	77.143	84.3029	73.3516	50.6302	44.9205	92.7475	89.9586	82.41	51.3538	56.3893	42.7393	57.5202	50.6275
1553213_a_at	30.9962	6.80585	6.12632	27.1745	21.043	9.67481	42.395	22.2032	10.4426	17.7517	11.7903	30.5377	17.4923	18.2701	3.59028	6.92327	17.5945	6.77546	6.74053	13.3406	20.0994	25.6852	11.7896
1553214_a_at	23.0596	27.5651	31.161	12.6026	29.3962	21.5881	37.8727	9.08163	8.29173	9.55426	24.2874	37.7521	18.6942	26.4154	21.0207	16.8214	29.2458	36.9068	14.3889	2.22558	20.3074	22.6324	22.1143
1553215_s_at	65.2973	64.395	24.7678	53.951	49.8499	36.6432	46.2894	51.3138	40.157	59.3797	30.0379	48.5685	43.2917	30.1108	36.0321	47.571	63.02	25.5362	55.439	48.731	44.5773	55.2342	27.3679
1553216_at	113.783	82.3053	87.8445	110.734	72.0526	117.125	101.844	95.8969	90.778	120.081	100.73	106.709	74.835	112.764	82.4917	127.14	100.975	91.7342	94.6015	58.9843	78.3755	111.196	83.3116
1553217_s_at	124.12	109.279	86.3753	79.9811	51.2557	95.5625	62.1841	75.4442	99.1877	144.622	111.667	107.281	57.8495	71.2569	100.519	123.887	101.877	107.302	85.5607	88.2332	82.94	76.7325	70.3502
1553218_a_at	351.196	378.199	361.432	445.845	473.568	346.54	345.122	361.554	340.036	332.282	398.369	345.745	300.297	337.696	341.912	282.478	285.349	411.49	362.904	303.974	380.631	336.191	366.735
1553219_a_at	91.3953	62.0709	56.4132	71.0622	66.7062	66.5604	79.5146	21.3027	61.9859	69.1288	47.7089	46.2324	76.0473	86.3326	68.4593	85.9455	79.1144	80.7501	57.3117	48.4837	45.2678	104.326	58.8079
1553220_at	50.9548	89.141	74.8036	68.7811	103.007	81.1795	33.49	41.6299	64.7681	71.4015	69.1513	60.4656	52.4308	38.633	45.0022	76.2873	83.7739	102.487	46.2041	46.3828	41.3925	60.6622	68.1321
1553221_at	57.3823	64.6693	63.3449	49.3136	50.3336	77.476	32.1306	69.5487	61.0986	47.8907	40.1047	32.6425	50.9925	79.6997	71.7039	27.6255	45.1966	40.1953	72.6662	41.5014	61.5259	53.2199	45.0371
1553222_at	101.299	69.8324	23.6312	115.218	57.1574	120.228	101.935	107.039	66.7962	104.646	84.9155	35.3069	70.1174	79.347	50.1748	104.511	112.047	130.097	123.014	46.7794	138.074	94.12	80.9004
1553224_at	112.015	129.403	107.272	78.8266	112.789	86.8661	125.18	132.253	112.558	127.334	99.619	124.831	92.2847	127.471	124.945	60.9774	71.5138	104.342	82.9253	89.3543	104.533	75.8695	105.715
1553225_s_at	101.492	75.6204	89.2671	120.468	118.062	127.949	85.9524	70.589	84.8304	67.9691	84.9006	107.048	73.6953	65.0896	68.6637	94.3699	123.05	72.9862	84.6441	54.0687	78.6535	110.003	111.28
1553226_at	49.5169	53.8514	54.7908	29.8086	7.16087	44.6192	16.1392	5.47893	25.5568	6.1043	34.0808	23.5781	46.1285	50.7006	48.9338	35.9211	67.8117	27.7583	42.3139	26.7453	48.475	17.7056	14.7326
1553227_s_at	201.321	237.722	174.034	232.311	217.58	253.356	181.433	182.441	182.591	268.233	284.31	314.594	222.546	241.725	259.766	292.029	216.274	329.628	254.641	225.971	236.981	262.573	225.67
1553228_at	20.0267	39.9842	47.6711	21.5066	33.8912	38.9678	37.7579	28.6422	58.9138	40.178	14.1554	43.6059	45.1264	13.3477	22.7542	27.7955	31.7927	43.9702	17.9702	21.2792	31.0913	48.3911	12.9933
1553229_at	57.7596	59.1708	25.1631	10.2866	22.0941	35.4332	25.0863	2.60745	31.0089	37.8425	29.0871	10.5267	36.1115	36.7628	33.0892	38.5145	40.9126	27.8836	20.7386	50.4728	71.7573	53.5459	25.1916
1553232_at	27.4546	36.9405	28.1099	32.2155	28.9507	38.1086	35.9012	4.5303	37.9707	48.2069	11.5285	27.8395	41.5762	22.0603	33.3982	37.5996	28.7084	36.6835	37.4727	17.6859	28.5167	25.8908	10.297
1553234_at	68.7207	83.4753	81.3622	91.1239	84.7065	66.7666	46.6907	64.2262	42.3346	80.3878	80.8166	67.494	42.2668	79.813	64.3682	42.4801	77.6605	120.032	51.0292	28.0459	103.087	76.466	2.30608
1553235_at	70.3745	122.01	81.1643	32.2344	47.3369	65.0352	8.64396	28.5044	9.16015	78.4335	11.1997	51.3159	23.2912	30.1959	57.866	115.904	121.826	70.0145	71.9239	59.3571	10.055	13.9839	76.9378
1553237_x_at	65.2826	100.448	64.7902	58.2433	90.2486	85.8419	59.7864	70.4726	89.9267	84.4132	67.5969	80.6568	69.2653	73.4359	76.5921	74.5122	63.3947	100.598	90.9322	61.9601	103.36	87.0009	91.6253
1553238_a_at	98.5939	33.5739	58.1888	60.9892	33.1705	12.4479	52.2756	15.6302	13.2029	102.279	10.7129	19.0374	52.9211	52.788	11.9536	67.9139	82.9209	29.9573	14.1118	9.42405	39.4681	45.049	21.33
1553239_at	51.1749	43.5575	44.2825	22.1772	15.0945	54.9538	6.81984	48.1819	70.4576	64.4302	34.1628	21.3132	34.8897	6.79589	17.1675	37.9168	52.6283	79.9794	56.1382	97.8538	41.6521	46.9391	64.3626
1553241_at	28.4782	44.3875	29.6784	58.403	46.0419	52.7298	73.6788	40.3918	28.2314	38.5762	34.3438	48.3232	48.8345	33.5644	14.5462	53.0775	45.1723	61.5061	39.5273	17.4636	59.0869	43.1934	26.3321
1553243_at	75.7001	66.4315	40.3961	49.21	40.05	46.5684	58.5748	52.4659	47.1174	53.6862	41.3423	42.5341	35.7925	29.2753	47.8047	26.7529	34.9714	42.6677	52.2472	68.552	49.5493	67.8302	47.6678
1553244_at	119.965	98.9384	136.823	180.143	130.238	112.369	144.541	160.845	152.03	157.491	158.341	165.517	129.432	126.821	171.177	186.324	152.362	192.873	106.75	114.483	141.998	128.737	153.89
1553246_a_at	13.9304	28.0524	18.3026	35.5006	19.7183	12.5646	11.29	25.1343	7.0137	67.7023	25.9431	38.3557	33.8728	32.4591	48.1071	15.0553	47.9865	29.7825	4.07473	8.70317	18.4569	11.8491	13.0378
1553247_a_at	42.8116	26.5616	25.7363	3.73114	21.934	28.2501	10.7964	6.03905	10.1327	30.5081	7.7103	12.8578	12.0251	8.37503	17.6488	19.7417	10.213	26.6937	6.9434	10.4114	6.38822	26.8673	5.10549
1553248_at	35.0294	165.652	104.15	112.31	72.8913	68.4517	141.126	122.023	117.346	131.826	87.0489	73.0578	103.163	129.71	134.304	85.8403	74.0748	80.2902	113.604	33.6526	86.1707	115.126	76.5673
1553249_at	35.6521	18.1443	2.59771	6.91696	45.1431	4.88296	9.94331	9.18516	2.71288	17.0617	29.9352	17.3602	30.7218	22.2466	9.12053	39.3788	39.8088	32.9335	21.5288	35.8104	9.96471	18.6779	5.78383
1553252_a_at	335.92	232.836	254.604	357.879	330.527	285.144	251.089	323.017	239.827	348.876	322.262	288.185	282.655	260.624	231.819	317.267	276.355	243.85	307.422	242.915	227.084	295.871	230.014
1553253_at	44.1412	116.066	66.6399	81.132	7.90443	62.1026	34.8448	55.4641	54.1242	34.2997	32.8575	37.4036	36.7321	28.5769	72.4592	46.8598	61.8719	19.2339	49.2368	72.2715	62.4141	25.3098	58.2617
1553254_at	4.52916	6.14952	2.39625	1.67261	2.45476	4.18424	1.05375	1.70788	4.2144	1.67347	1.17069	1.78743	1.59905	1.8149	3.22091	2.56918	2.54927	1.76006	3.20542	5.01178	2.97066	3.58672	1.8592
1553255_at	25.8049	35.6247	6.99422	11.1441	10.6216	14.2591	9.73081	5.63709	9.28598	55.9812	21.6271	11.8431	27.2037	8.78368	20.3172	12.2281	11.3057	3.47386	14.3913	32.4142	11.3562	10.0379	7.07782
1553257_at	8.02489	17.3145	37.6664	43.5865	37.5614	37.4569	16.8586	9.91451	14.905	32.5745	37.9829	42.9712	22.0672	17.7316	35.9525	19.0105	38.105	58.189	25.2298	5.08876	29.438	5.67946	47.5968
1553258_at	28.3636	31.6221	26.3929	24.3853	43.1069	29.23	26.2809	62.5053	29.5427	68.7729	41.8113	61.1008	24.1356	7.27915	6.95442	65.0396	57.977	14.5506	6.61456	22.5881	36.5604	39.5941	4.98912
1553260_s_at	8.27038	2.33485	3.67918	10.7014	1.99708	2.70409	17.7053	11.5113	11.0244	14.1182	0.744293	4.09243	13.7043	20.2938	0.999814	5.35547	9.24826	2.50598	0.815901	3.12886	6.75007	1.69834	26.7786
1553261_x_at	28.5223	13.7833	34.879	5.38456	31.6617	9.70604	34.6352	13.207	21.4828	24.2723	1.51792	25.2954	13.3872	36.426	33.9936	29.014	14.5342	13.2778	21.0167	1.58376	26.1815	26.6373	7.02717
1553262_a_at	180.22	40.7289	170.246	39.1261	232.113	100.455	184.099	170.265	178.224	113.426	171.779	295.197	39.7081	144.947	142.987	153.881	196.733	240.631	146.075	137.094	97.3301	193.01	187.458
1553263_at	69.379	104.982	90.197	21.3769	76.9038	75.3948	97.1405	68.2955	96.5517	95.2379	68.4459	83.7839	129.508	91.2642	63.8786	97.9654	83.5614	114.832	112.588	106.968	95.3534	71.8131	146.863
1553264_a_at	40.503	29.0285	83.4117	60.5911	7.19893	7.42482	36.0442	45.8004	43.5781	10.1254	31.243	49.0346	34.5148	12.5078	60.7164	9.05301	7.27451	27.9277	4.39232	15.8601	44.7333	15.4483	7.96686
1553265_at	33.2239	18.5473	27.5025	11.4899	30.5534	15.7893	53.9475	6.07349	5.38964	52.8184	25.543	26.4937	36.7843	41.7819	24.4168	32.6094	3.68654	24.7768	61.8425	58.1078	22.0052	33.5655	15.4587
1553266_at	4.538	3.99074	13.6998	20.1911	25.6468	19.2665	4.18675	1.26867	20.5051	2.27145	13.9427	1.71883	26.5275	10.0395	3.97082	26.0988	19.5187	27.0021	2.16187	14.195	20.3083	3.4132	5.58772
1553267_a_at	25.2973	29.7755	21.7588	37.4262	23.6841	34.3553	17.2227	9.90562	13.596	4.53983	33.8991	25.7232	24.9325	21.7939	21.2718	41.2355	25.5966	33.4534	25.0271	5.64293	21.0508	8.34755	19.1937
1553268_at	55.1131	17.9005	25.2898	41.6511	67.7371	44.5029	36.172	41.4356	59.8806	38.2638	37.2998	25.2903	34.3266	40.8882	35.8371	17.9386	29.8652	76.9839	27.9215	4.06656	51.6023	23.1353	42.4373
1553269_at	558.967	572.458	561.403	511.216	531.019	526.722	334.414	336.932	478.798	485.752	507.056	547.603	323.13	461.609	347.754	430.607	417.696	439.701	354.215	340.395	449.906	508.871	317.879
1553271_at	48.0102	89.0209	58.1757	44.85	45.6249	58.8899	31.1563	41.4374	62.4517	62.481	53.3491	50.1601	69.2452	100.204	53.9963	62.3514	63.5093	53.5728	73.6122	76.6167	75.6797	39.1109	43.6259
1553272_at	44.2945	51.0332	69.3497	58.5806	46.7465	21.6823	36.8609	35.208	62.2802	30.4184	2.56159	48.0417	63.3253	46.2606	75.3254	24.9208	14.3336	7.74825	39.5486	30.8083	84.0591	54.7085	14.8495
1553274_a_at	473.352	518.358	390.26	458.049	369.254	403.243	452.417	422.879	487.085	453.128	508.216	441.744	457.159	453.697	425.929	392.17	425.904	389.205	484.008	517.781	439.615	467.951	407.625
1553275_s_at	97.9106	98.7071	116.208	156.062	138.572	159.092	170.563	105.105	147.465	84.9897	100.014	72.4916	167.996	155.439	142.171	120.929	93.8143	123.027	133.714	145.456	177.241	111.017	84.6847
1553276_at	27.8	15.8559	5.07513	4.91844	5.03219	4.82879	46.3562	37.0174	6.44493	39.96	37.1221	31.1842	40.9779	5.98574	24.5707	47.5074	40.3879	27.7928	37.6275	24.2308	76.436	50.4919	24.7213
1553277_at	18.3431	24.8759	21.7817	6.93416	19.641	20.5921	17.2735	21.1919	18.62	9.27406	7.97733	25.822	12.4403	12.1552	20.2083	24.0712	12.4606	29.3376	18.276	16.6331	23.236	12.268	11.4277
1553279_at	15.2362	64.378	65.3937	60.8328	112.158	45.8916	91.2271	9.01064	27.1859	102.975	89.0324	102.649	38.7044	79.5352	81.511	81.4005	93.8504	110.768	84.698	75.414	98.0793	102.879	140.597
1553280_at	92.4959	90.3928	95.2023	100.287	107.611	80.5663	54.088	99.5306	69.9911	89.0889	72.0406	57.1806	95.0985	63.9407	78.5253	90.2805	62.0736	91.8358	79.3432	56.6915	104.849	129.944	90.6251
1553281_at	6.38017	16.2124	4.84186	15.102	2.72932	6.34568	12.2469	34.881	45.4017	5.16587	2.76664	24.437	7.29419	34.8374	36.6888	6.74091	6.52533	29.9372	8.84465	43.3383	25.6082	4.41812	40.8323
1553282_at	36.6032	11.0541	8.01748	27.3137	4.53987	4.06789	26.2018	4.2606	25.3885	48.1411	42.3288	37.8931	17.0014	14.1631	3.31133	8.89988	25.975	58.4129	6.215	40.746	6.63379	7.15892	7.23523
1553284_s_at	54.5225	41.0055	47.4926	55.6137	48.4649	65.898	78.5354	64.3503	42.2891	71.6276	74.863	84.309	50.7603	67.1776	43.5507	35.1199	54.9857	45.6723	35.7907	45.6862	40.966	48.676	65.3805
1553285_s_at	52.3064	64.561	55.5	60.5087	65.8465	56.8946	41.1563	34.9125	42.1055	53.7154	38.5479	48.5513	48.107	75.7463	64.178	39.1801	50.4481	59.3225	56.6774	57.2737	65.846	48.5824	30.3749
1553286_at	215.403	236.081	221.077	212.943	210.004	192.85	227.888	292.489	205.044	304.55	216.344	231.025	277.089	216.201	221.084	245.133	207.907	202.534	216.028	182.994	241.066	245.67	231.19
1553288_a_at	41.2876	11.4983	29.5183	23.4156	50.0364	29.64	13.209	4.9737	4.8688	23.1394	31.6739	25.8516	34.6834	17.9519	24.1339	28.0594	44.3277	43.403	21.7756	34.4226	27.9524	17.0021	30.3687
1553292_s_at	172.985	177.69	163.643	148.115	169.198	199.446	139.976	105.586	162.356	198.418	198.971	215.238	101.797	132.167	109.997	160.576	173.941	181.94	105.953	133.564	139.479	170.077	183.882
1553293_at	52.6751	78.2204	129.503	54.5609	60.6151	80.1408	89.5099	113.283	104.915	147.198	140.542	111.813	45.9588	29.5428	31.3757	20.2473	14.5054	24.2479	50.9445	55.9928	41.6062	101.11	88.5807
1553295_at	43.8428	10.2463	35.2553	34.6545	38.8114	26.2933	29.4617	34.527	29.3672	45.1729	25.5364	6.32781	37.9851	31.0757	34.8793	31.3006	37.7737	32.2945	33.6017	21.6079	40.7247	28.4268	20.2938
1553296_at	15.1712	30.6509	30.615	38.7465	24.2751	35.7511	35.0858	35.0399	36.6205	41.1966	33.019	31.1295	14.3748	38.6438	30.254	9.6826	6.82637	24.3599	26.2895	56.5913	17.3649	25.4137	33.8488
1553297_a_at	88.4854	74.8073	54.1831	69.4309	22.4091	85.3837	26.8075	57.3073	111.914	12.8065	18.46	106.035	70.2245	49.0634	93.1978	45.4742	28.6186	18.5663	57.8309	36.9334	30.1007	23.8496	52.0848
1553298_at	55.8891	14.5572	24.0369	13.8949	21.1866	25.7856	24.2794	23.4578	37.2381	21.7115	29.6051	27.9131	26.9663	25.5131	10.9515	24.4347	27.6615	13.1494	16.0055	22.9622	10.8468	3.41936	10.5171
1553299_at	602.855	490.715	595.704	670.25	836.269	740.394	515.801	349.15	399.607	858.781	1033.7	1120.97	420.784	751.579	541.823	875.174	911.378	775.709	679.191	483.887	742.551	958.328	609.084
1553300_a_at	74.9215	107.86	88.0581	87.0115	74.4384	76.5483	123.502	104.17	111.26	105.304	70.4032	77.7553	66.4643	116.12	88.2228	103.157	66.3063	83.3108	130.29	90.1334	97.3266	92.7409	92.0399
1553301_a_at	58.3629	46.9984	58.3741	62.251	48.6723	35.3944	42.2185	51.3492	39.1223	51.8648	47.2837	41.126	41.9052	40.0934	36.0804	59.5891	41.5225	47.7461	45.5175	30.3642	52.0405	40.1478	31.1834
1553303_at	9.41582	32.808	14.3006	24.9733	14.6781	14.3508	32.3967	4.98446	60.7851	111.007	51.1986	54.4041	70.5829	70.864	42.4421	54.5611	14.6085	17.5931	70.9743	34.1645	65.129	12.5346	12.3014
1553304_at	45.0069	81.6447	57.8196	65.1536	98.572	64.7246	54.8972	69.6611	38.1409	74.7401	20.4068	29.7688	31.3199	52.4898	71.1449	27.9779	53.4409	54.2251	52.9711	60.0795	9.82944	32.2472	51.905
1553306_at	63.1458	63.7921	61.2192	22.7594	38.6478	61.2462	43.7495	46.5429	46.3349	49.3731	4.17255	95.035	51.6273	42.4346	76.3702	25.0257	31.0517	50.5432	62.0132	77.3447	54.4539	54.7106	38.2914
1553310_at	2.38301	10.0443	11.9544	1.50443	5.34698	18.9552	0.914847	15.2528	2.16634	19.2086	1.05868	2.4681	10.4397	1.35841	1.93654	2.05572	7.96551	1.34878	9.86862	0.437838	2.35201	18.2917	8.30128
1553311_at	54.1281	44.3748	62.2001	34.877	52.8443	83.2367	77.5366	48.9974	44.3286	769.483	646.685	955.556	22.6539	11.0785	42.2637	22.9449	25.6551	30.76	32.737	31.6824	33.3533	50.5142	43.7417
1553313_s_at	110.707	117.581	132.741	101.182	114.567	125.151	101.322	91.9429	133.243	149.788	141.884	98.0586	80.6654	89.2637	80.3069	63.2584	99.8522	61.5508	44.8646	91.4838	93.3582	89.6189	75.9796
1553314_a_at	40.8812	13.0259	9.35263	42.6107	36.7401	25.0569	75.8174	15.7528	52.2864	31.3315	10.2401	17.0732	15.4085	9.50333	9.26176	72.0307	31.6432	14.4888	46.0832	58.3149	24.4592	58.9666	12.7119
1553315_at	43.1065	30.1159	49.981	48.1622	35.4578	50.6617	29.6368	42.5393	38.3649	57.3986	33.244	34.1117	36.6267	49.7956	29.2092	57.7193	21.0949	27.7225	53.0512	29.0169	39.1698	49.3149	39.9495
1553316_at	3.70998	5.48287	14.9206	5.2543	4.30736	4.95147	5.44049	2.1173	2.4418	4.13095	8.69968	32.0507	3.55951	26.8505	26.2421	13.5085	3.34368	34.9797	4.29089	9.6371	4.73838	7.39759	6.42765
1553317_s_at	20.4606	23.2516	8.29225	20.8914	15.759	14.3794	9.76412	12.6508	11.2889	16.7965	20.2625	15.494	29.2009	19.9923	17.2991	26.6693	16.3813	13.1606	17.8626	13.6319	6.32655	19.0859	20.1819
1553318_at	23.7012	7.9602	6.6154	3.42492	7.20126	5.63525	12.022	8.2805	6.7077	2.23824	19.7364	5.17263	33.559	5.81135	24.7875	2.25319	7.99412	18.8941	8.08104	10.1882	12.3486	22.2813	4.48989
1553319_at	2.35555	2.09844	6.11373	1.9936	2.76222	6.16641	2.82233	7.07936	28.0507	4.48765	5.79266	3.39909	7.00033	3.11244	3.6703	7.7451	18.265	7.63242	17.762	2.22885	5.97658	3.4524	5.47251
1553320_s_at	24.6334	31.2342	4.34693	9.68301	24.6935	18.5769	16.879	3.17734	32.8695	16.824	28.3677	3.05611	42.9127	4.67283	23.7544	25.6091	8.69443	23.9653	24.0438	17.7259	5.69033	8.5709	3.59107
1553321_a_at	29.7828	42.9013	36.9325	39.7493	50.9728	42.0215	29.1991	40.6514	17.2851	57.7328	17.1805	30.0748	50.9013	26.1877	56.5603	52.5096	35.873	65.6307	23.4296	31.3579	39.05	38.9028	20.3528
1553322_s_at	200.403	147.921	167.121	107.395	74.4822	71.3835	142.993	159.424	172.775	71.72	91.083	63.0383	161.808	214.399	173.199	102.745	81.0151	123.816	259.192	169.237	195.894	103.698	87.1442
1553323_a_at	6.44285	27.2784	13.6761	44.8791	12.0812	47.6083	28.7027	5.02943	40.4087	18.7651	19.9436	31.0108	19.866	23.5521	26.992	42.2852	10.7683	20.3384	69.55	56.8531	42.5669	42.4835	35.1361
1553325_at	36.8024	43.3739	40.2207	23.6555	44.606	45.8443	43.93	47.0382	34.9389	53.1846	32.556	29.9994	2.91105	41.4847	7.43221	21.7889	23.2493	44.5834	7.7593	16.3556	20.1213	33.6429	53.0127
1553326_at	21.8285	44.7383	32.59	31.1568	16.6778	3.64788	5.88274	2.81804	12.6717	2.08834	13.0496	14.7882	20.5566	19.1573	3.68286	12.0386	18.3059	6.1178	2.38496	14.3234	12.6094	4.12556	14.0363
1553327_a_at	6.08586	6.83572	6.86789	7.23601	4.9221	5.93601	5.42124	6.32721	14.1135	5.11546	6.37695	4.17756	2.16978	4.07911	8.07902	19.2548	7.89702	7.79323	29.6073	4.86244	59.1972	3.34755	53.9384
1553328_a_at	14.8045	15.5614	17.3349	42.3101	2.30244	14.2014	13.7115	9.26865	9.84614	45.2945	30.0104	37.6022	6.77071	13.2469	31.503	29.8587	28.8053	30.1959	5.13129	8.73485	13.5292	11.2681	20.1883
1553329_at	26.0324	12.544	40.4896	18.9122	24.331	31.1365	13.4851	57.9233	36.7817	34.1495	41.1108	23.689	33.4831	34.7838	50.58	28.8661	43.7768	39.4793	35.1293	51.193	40.9716	44.3147	26.5869
1553330_at	3.64121	18.2579	43.8532	1.79692	4.50528	21.0672	2.83733	19.4728	28.9852	39.0763	19.066	16.5338	37.6394	5.41237	26.9704	34.3779	26.1092	27.0927	27.7263	19.2169	4.03844	8.99893	30.2778
1553333_at	37.4002	43.4105	44.5403	50.3616	53.3287	44.8204	28.6542	35.9881	51.5002	39.7168	28.4955	41.263	17.4256	5.27871	25.6513	41.9572	47.5103	45.584	41.0906	45.0123	31.076	39.5934	25.404
1553335_x_at	37.2382	69.7697	35.1322	17.5376	59.378	14.7723	47.0618	12.6881	17.3109	29.7842	49.8056	37.0286	53.2371	28.9809	38.5248	40.109	35.8233	43.4337	41.4823	8.01563	46.0372	38.1826	6.07273
1553336_a_at	20.3061	29.3111	37.2742	18.2662	2.45152	6.9482	7.95076	21.4249	23.1193	6.74394	16.3619	42.5422	19.9102	1.94684	5.499	2.27572	5.54735	4.67748	15.2104	19.5407	17.1213	2.84864	2.63536
1553338_at	203.981	189.844	210.336	185.559	178.904	183.471	280.172	252.457	277.029	241.434	294.024	223.782	266.061	260.967	288.185	224.739	238.92	256.8	244.267	307.644	289.091	252.003	272.959
1553340_s_at	52.3757	68.2526	64.8522	59.5721	75.9396	82.3876	38.558	46.1289	55.3934	67.241	55.3451	107.365	62.0195	47.165	58.2546	66.063	56.8442	98.7253	30.2277	51.5077	80.9656	73.8502	91.9081
1553341_at	36.5966	47.4017	9.29811	10.594	12.3626	6.37143	21.3493	43.7731	9.93941	8.42214	17.2124	7.81962	5.7781	28.4288	28.68	4.38219	25.7483	48.0379	2.55221	6.81609	10.5163	5.53306	7.41429
1553344_at	1.74406	10.482	11.9249	18.3365	27.1032	15.3102	20.4831	2.74526	21.5754	2.32707	3.13393	6.14635	17.7664	15.0071	22.4123	16.1437	2.94531	7.98622	10.483	2.37665	2.42184	27.6231	12.7708
1553346_a_at	55.3467	73.2978	61.9551	84.1572	54.8667	85.1918	51.7546	55.9096	54.8276	54.3887	41.6094	37.8255	64.102	50.6877	90.5542	52.8639	45.6233	50.2324	60.2903	48.2034	58.5437	37.7153	55.9592
1553347_s_at	53.3158	29.754	94.2571	34.8271	25.3699	77.7383	19.854	58.5612	56.4347	53.6165	35.4085	52.7293	35.7197	49.4765	24.1216	26.947	54.7718	91.2045	37.0702	57.0177	56.3651	58.1305	37.2976
1553348_a_at	176.684	196.366	150.487	168.067	184.452	200.878	167.602	116.227	149.142	178.088	129.395	130.275	156.496	149.305	177.691	170.15	177.458	182.65	153.841	115.671	139.14	169.585	130.764
1553349_at	381.246	387.999	384.305	395.217	361.79	334.945	325.777	343.121	368.104	427.652	395.028	428.386	311.426	354.204	323.922	379.442	362.603	362.782	396.262	358.86	371.54	375.651	368.554
1553350_at	21.9723	75.706	30.6006	38.1087	50.6886	37.3817	61.3689	75.2374	81.2217	82.7732	26.4978	28.6492	14.0111	10.618	13.8874	23.2362	25.8475	17.0383	26.0789	33.8429	47.0784	44.5518	11.5322
1553351_at	23.3929	11.3675	36.5099	5.8552	43.5934	7.37767	57.2497	12.9485	52.6909	14.9148	36.9455	47.9284	6.53399	19.8219	50.612	42.9996	17.2925	44.1168	8.39885	31.4558	11.6907	23.177	19.5037
1553352_x_at	36.4249	11.3452	16.0851	4.90533	9.74687	74.2493	3.90771	8.49889	14.9293	7.38567	51.1127	42.5057	10.5445	25.7319	36.3115	40.0098	43.5858	5.06675	19.3962	4.63644	8.36441	7.43076	23.4671
1553354_a_at	101.562	155.057	92.1257	33.0817	57.2017	46.5506	42.4121	67.1252	53.1287	60.2129	66.0901	68.4295	70.6259	52.3138	76.3805	68.6972	60.5286	103.085	76.883	62.5649	69.6745	92.8334	66.8368
1553355_at	9.53418	7.63092	10.2405	18.7062	3.07821	4.34411	5.10318	2.97855	8.81315	5.07185	1.59065	4.77697	3.97975	3.33322	3.27542	6.26243	17.5965	2.87393	5.20374	10.1865	8.3705	4.71676	16.1945
1553356_at	1.95519	1.50714	2.05533	6.43365	2.05079	9.46631	3.31139	2.196	2.01933	21.4854	2.4769	14.8928	2.02355	0.897372	12.1455	6.3877	2.26529	8.11782	14.6484	21.9591	3.50111	15.3697	20.6923
1553357_at	25.542	14.0724	24.023	4.41198	19.1348	14.7596	26.9935	19.1487	30.6816	19.0129	18.7176	16.7408	14.4277	29.9747	16.7285	28.4683	12.3723	22.4455	21.5263	19.6019	18.1275	12.9742	7.79432
1553359_at	16.8813	21.1584	21.8531	24.6295	17.603	14.6817	16.7338	18.1077	11.2297	14.9562	11.704	17.6339	13.1989	15.799	13.9942	18.84	16.9071	23.5531	14.2216	9.25972	25.4531	10.4973	19.9198
1553361_x_at	19.1052	20.405	19.7885	11.6906	16.1957	9.66224	11.7463	19.1055	19.9089	16.7877	12.2417	12.5301	11.6945	13.5608	22.1158	14.418	13.6123	22.2693	14.8796	8.19674	19.9686	12.9471	11.955
1553362_at	3.51078	1.35653	2.54285	6.60584	1.01159	1.8474	6.59774	1.51543	1.84012	2.3731	13.6405	1.04889	1.66395	0.623919	2.4398	1.55591	4.11643	1.27517	1.35247	1.90972	0.986125	0.427696	1.08957
1553363_at	51.1414	35.1835	8.73354	34.81	6.99116	18.5008	6.55887	25.3507	11.0345	21.755	24.3841	23.583	31.0686	25.2685	29.9909	1.7573	33.5877	19.9628	11.1191	7.65272	19.4971	16.8663	6.26827
1553364_at	30.2762	22.6048	15.0981	28.0995	31.3264	35.5477	25.9018	17.9187	21.196	36.6285	17.4997	4.23237	20.3046	28.9219	26.8059	39.5325	52.702	20.6402	33.2109	2.91134	4.327	32.1685	34.2913
1553365_at	23.1941	19.6258	31.9856	20.5411	37.6861	30.4846	32.9631	25.0275	50.7017	22.6604	48.2719	49.51	37.7194	28.5895	38.4893	34.6737	36.0024	44.0547	46.4478	47.717	47.6886	36.0079	28.2392
1553366_s_at	48.122	52.6297	22.6531	9.54393	16.0551	5.25824	53.7188	4.78921	17.0691	53.6446	31.1423	38.0518	9.63426	34.7921	4.4996	14.7306	14.6012	34.3272	5.1635	10.5189	32.041	13.7426	29.3513
1553367_a_at	50.96	52.2623	39.9525	27.4979	70.5735	6.82587	13.5525	77.946	22.926	60.7069	74.8146	23.4062	9.95454	29.0089	55.1475	46.2825	36.4796	45.7284	52.3759	23.0653	79.3701	56.9993	45.1045
1553369_at	4.08648	6.10309	10.9872	15.9558	45.5943	10.813	7.78885	7.4699	8.15694	7.57223	9.58645	10.3312	4.96771	5.45056	6.74396	15.3913	6.4482	6.65259	6.93726	30.8686	4.16861	7.07284	8.71652
1553371_at	36.9503	49.2266	30.8068	17.1722	11.8676	34.2476	22.2017	36.4326	33.9517	15.7551	13.7337	17.5685	18.979	18.4782	26.0075	28.7235	6.7213	6.26789	20.173	40.6501	37.5434	9.41042	26.3838
1553372_at	17.4805	5.97019	4.94434	13.1798	24.9287	3.15282	4.16972	4.00581	6.16134	19.6065	16.7139	9.01655	7.61161	10.26	3.44892	17.8038	3.04389	19.5894	18.7152	2.32946	3.6909	8.22679	11.3541
1553373_at	46.2261	42.6909	49.771	26.8821	62.9808	24.6425	41.5129	27.9413	26.4436	57.5096	39.0374	34.1644	46.7824	60.2058	21.8178	27.2457	41.6268	45.5349	32.4008	31.0308	46.3124	61.3204	33.5659
1553374_at	38.767	39.2724	49.2052	33.5521	46.6313	55.6668	23.7373	29.7388	34.5688	40.6119	26.2081	53.1834	51.4739	41.7375	30.3036	35.3755	69.4024	47.7177	37.343	4.999	39.8602	26.7653	24.562
1553375_at	33.2177	48.9816	8.30624	29.5048	50.7923	58.1895	32.7084	25.0531	22.1561	62.8847	50.6171	41.5005	43.944	37.4499	49.4067	31.1787	47.1785	36.8911	49.917	45.9944	14.283	57.1697	4.77269
1553376_a_at	18.3236	36.2364	27.2688	22.5304	18.1225	7.69768	16.2142	18.9698	28.048	19.1118	12.8112	14.5691	22.9677	33.4211	21.3178	20.9918	5.51458	14.7389	24.4143	17.3961	3.60482	18.9789	17.1254
1553378_a_at	22.762	34.3455	5.3832	30.5942	3.34318	14.8158	16.2432	19.438	16.7119	5.03891	13.2847	28.5797	27.1784	47.0118	7.66077	20.5981	23.5134	7.94882	21.2605	6.56517	5.41088	9.21164	4.94486
1553380_at	4.23565	4.28055	24.1416	26.0764	20.6756	7.67914	20.1744	20.692	36.7595	37.2413	24.2509	11.9454	4.66226	5.37013	33.9257	7.85626	7.15885	31.7474	6.76796	8.31419	8.55105	12.4436	7.56183
1553383_at	1.38281	5.32077	3.16863	3.06029	3.97008	1.60225	4.3419	14.7375	1.42697	2.21939	8.41274	2.7622	1.12811	9.61416	3.16819	3.37176	3.28077	4.90926	3.17136	0.778728	3.95994	2.81466	3.06675
1553385_at	16.1671	9.36566	23	5.77055	11.2589	7.65647	17.721	14.7584	16.4058	5.1133	3.43952	36.7425	20.4275	4.30797	37.0731	2.63169	2.94122	6.41343	19.5695	18.6479	3.47261	3.80174	3.12456
1553386_at	133.977	183.294	220.728	198.33	247.234	198.3	94.2101	160.557	189.416	121.711	125.713	110.176	176.815	186.976	102.764	114.81	145.215	254.986	144.118	127.393	195.829	219.837	198.554
1553387_at	114.641	71.9421	90.4942	97.7283	75.7205	109.975	85.5532	87.2009	96.8234	95.6135	114.242	107.488	79.9894	63.7598	85.5688	92.3215	85.8312	84.3478	89.8411	107.139	78.1737	80.6045	69.9722
1553388_at	34.8032	30.9831	35.1444	10.3215	29.2694	12.2051	34.0417	24.608	29.2215	11.067	34.5702	37.5688	2.25959	34.7563	51.1081	28.2609	18.4975	31.7119	32.0153	22.352	10.9779	4.67983	27.6927
1553389_at	51.1012	37.2871	62.8607	43.185	40.4638	21.4433	58.2512	58.1672	49.5794	71.4995	55.5478	57.1151	47.4436	47.5816	59.9273	51.1913	53.4169	44.4925	45.7413	58.4471	42.7897	45.1646	51.9537
1553390_at	4.332	10.5253	12.3804	2.5138	1.67103	4.82396	8.79794	5.61011	6.06686	23.6565	18.5839	23.3132	12.0053	4.33749	23.2414	2.10153	14.6975	9.75392	6.03226	23.2771	18.3724	24.2908	24.5627
1553391_at	15.4813	29.0565	33.0133	1.20991	34.5557	27.3241	34.0533	24.1803	31.0373	15.8854	9.80651	31.5332	25.2537	16.2128	19.9897	17.8189	13.7425	25.8497	30.5392	25.3356	51.5403	19.9807	48.9259
1553392_at	56.9635	36.9387	55.8581	31.67	15.9641	21.6368	40.7762	38.1588	51.312	29.0338	25.7204	3.39165	50.2223	70.5217	45.2893	36.0976	33.9887	47.2507	78.1137	39.008	37.3654	34.2946	35.3675
1553394_a_at	6.59734	40.3998	12.1953	35.948	42.872	5.9637	29.1639	60.7669	34.533	7.6119	5.43712	24.1159	27.0863	28.8951	28.7116	33.9538	44.6999	40.1178	6.59702	45.7485	27.6872	50.7458	4.68897
1553395_a_at	30.0843	26.8136	41.1708	26.3587	47.7554	35.7945	31.9259	50.5042	12.8457	34.7152	30.6388	18.6691	38.1124	36.0029	22.4781	15.3085	48.3736	42.3978	19.7742	15.8448	9.51204	17.8551	42.7387
1553396_a_at	104.747	23.7766	112.978	119.531	86.1186	72.1235	189.574	76.5176	131.993	137.529	43.0494	41.9317	84.2046	53.0711	167.292	131.015	80.9276	131.133	181.147	150.298	162.009	212.007	39.3174
1553397_at	30.5048	125.99	117.327	60.092	76.1502	123.411	84.6961	81.4355	70.6659	143.299	74.008	110.513	79.2513	101.577	96.9174	67.4087	64.5326	168.483	67.1281	134.455	82.2943	75.9804	91.6842
1553398_at	5.07283	7.75576	20.7332	1.00596	35.2883	20.8919	9.85455	4.95992	3.59806	11.7284	4.71204	7.48241	12.3379	21.2516	24.5135	2.75621	5.76813	9.16189	20.0976	5.84821	5.81599	11.0528	2.50073
1553399_a_at	94.0181	102.666	73.455	12.3432	72.8868	73.5369	99.757	18.8624	24.0859	110.502	67.7494	72.0715	59.7975	71.8006	12.9827	28.3337	57.7556	22.0436	63.0208	60.3094	77.5565	79.7277	18.8115
1553400_a_at	127.543	91.1892	113.264	144.462	140.07	175.334	92.1933	88.8824	98.4888	143.013	99.1496	131.506	102.166	86.3996	111.257	159.239	165.993	170.219	107.392	78.4087	107.106	168.399	165.391
1553401_at	100.356	132.962	96.1822	87.0271	81.0844	52.4431	94.7107	113.012	122.036	63.9591	54.6	99.6876	88.5762	83.793	144.085	73.4527	106.997	119.277	96.8445	112.338	85.9182	90.5317	95.1446
1553402_a_at	50.9996	83.5744	58.0092	52.1981	86.0824	64.2856	63.8875	63.3056	51.7824	98.9878	65.5188	88.2735	63.873	55.9289	67.2643	47.3089	62.9248	64.2256	59.3355	54.7462	71.7128	73.9968	82.9273
1553403_at	2.72993	2.82084	5.38669	5.50476	17.8423	2.18981	2.71505	31.9573	2.21969	2.15668	8.60746	6.6736	8.76202	4.267	2.27929	2.62469	1.4404	3.62263	5.38442	2.88823	3.7792	23.0501	3.73253
1553405_a_at	36.0615	48.5735	42.5873	38.0096	27.5747	57.1664	38.8996	33.0317	47.6554	44.1019	8.90747	31.3248	45.7047	30.4809	20.8039	50.9824	37.7533	53.2	36.9276	34.9934	51.69	44.9305	49.2184
1553407_at	122.167	112.389	88.6329	85.4742	120.901	59.8407	167.791	133.727	119.305	226.819	234.125	218.492	113.059	115.107	112.789	102.41	88.8024	97.7163	130.899	147.529	133.958	117.944	96.78
1553409_at	1.35576	2.28723	2.10729	10.3438	1.71524	2.26686	2.13652	12.0663	1.10917	1.15933	4.17909	2.30748	2.10614	15.4935	1.81727	4.15765	0.837082	2.78758	8.19868	2.98867	8.82309	1.07929	2.58994
1553410_a_at	3.57981	11.8219	2.11134	1.89	4.60677	4.65337	3.29946	21.3067	38.7221	4.97587	5.02447	8.49041	12.0553	1.80028	11.9079	1.51777	1.50096	3.67778	31.2018	1.12472	8.52913	8.33614	18.8246
1553411_s_at	40.5321	40.9126	20.1624	18.3374	29.4416	13.1891	18.1082	3.19318	27.9738	2.60894	21.245	15.9099	23.0298	6.57497	32.481	13.131	19.3905	34.0945	13.2373	4.74648	12.6127	12.1527	18.7888
1553412_at	11.9748	34.4849	7.15168	11.0853	18.4893	34.0088	15.6206	38.8162	22.2789	43.8478	11.2554	45.368	35.1389	8.03505	11.8684	30.425	18.4686	65.162	40.4976	29.3242	21.2243	22.3048	37.2335
1553413_at	35.0789	9.0383	33.9303	35.0668	44.0001	26.9463	15.689	8.01022	8.44219	55.0869	7.23277	6.79893	68.8173	39.8297	73.9378	75.2705	67.2672	42.5747	56.2409	59.3256	65.1609	89.1038	105.135
1553415_at	1.49542	2.81269	12.7507	1.8612	2.03777	11.4587	13.6141	28.2356	6.94607	34.0954	15.8081	4.05851	1.05334	2.37899	15.0072	7.88166	3.03555	3.14704	7.99429	24.2067	19.8064	2.56826	6.96027
1553417_at	26.1041	47.0006	31.6114	11.2563	39.9067	31.697	20.8726	27.8454	48.2539	3.64904	28.134	28.8237	35.4639	4.05816	34.4169	23.752	18.271	19.6143	32.7413	9.84713	34.2906	19.6839	51.6772
1553418_a_at	54.6973	60.7721	49.3615	34.2948	53.2461	64.0501	39.1328	31.2742	35.6466	61.4056	47.9113	46.73	39.8255	26.8964	56.1055	40.3902	52.9398	76.4458	36.2472	36.3963	70.0393	45.0924	40.8204
1553420_at	5.45047	48.2549	29.0022	6.78255	28.1257	20.5212	37.288	42.6583	3.74852	12.2418	15.2221	29.1422	33.6101	34.2189	29.5227	32.0454	30.2572	22.1308	34.2735	22.7474	34.8956	26.083	17.874
1553422_s_at	47.0071	63.4739	8.28265	17.4817	6.03881	26.8505	27.4278	4.54397	45.0371	48.4964	42.6153	36.1607	21.3748	5.81861	51.4562	37.0945	22.5228	30.3735	34.6715	23.7561	34.0893	24.2024	24.7595
1553423_a_at	130.251	104.259	133.683	222.488	223.311	204.352	149.467	104.514	107.826	163.296	147.513	160.308	132.749	191.33	144.042	232.597	201.782	221.389	149.494	140.593	85.7554	229.804	159.762
1553424_at	3.05944	1.21139	16.8793	4.62399	2.19816	4.18651	1.36583	3.41975	2.28594	5.88797	4.38118	3.97444	2.79622	1.96919	4.52613	3.58765	7.08418	2.16965	23.6939	1.39692	3.02216	1.88398	1.74701
1553425_at	8.19785	17.5094	4.06976	10.7942	25.8821	5.67427	5.03284	20.5873	7.95791	2.168	3.59965	8.90252	4.3944	3.67235	5.35103	2.19585	8.2949	6.32295	3.37815	3.03892	10.6894	15.4139	2.90321
1553426_at	28.079	31.9157	44.3692	25.9615	38.1268	27.3711	18.168	4.27	27.4694	36.131	3.56721	25.0242	23.2845	26.2487	37.3726	10.445	28.8666	47.6294	25.5302	42.117	37.4941	25.8064	24.7018
1553427_at	5.34328	18.2302	6.2613	4.68126	9.76695	26.2697	21.6491	5.9562	18.1958	8.64856	15.0223	3.2612	9.38236	3.74932	24.0022	9.63993	2.83672	12.5951	12.5198	30.7187	24.3766	7.53591	6.09152
1553428_at	17.2291	39.3892	29.4509	29.8571	22.3917	36.9407	38.8188	18.9267	34.041	7.48654	26.1756	41.3321	22.839	23.6878	3.638	6.0989	33.2674	9.74258	4.05812	22.2097	19.1617	22.1293	13.884
1553429_at	11.2079	36.9438	7.89116	8.95749	12.3269	10.2945	32.2058	47.2992	13.7128	35.9326	9.95849	36.9023	11.9594	7.133	39.007	29.0242	17.1838	46.5671	12.6259	51.9992	52.2576	10.6442	24.2651
1553430_a_at	8.46357	18.9503	51.8376	4.60834	32.5974	7.20696	40.8772	27.462	33.9884	17.75	32.7388	49.5495	55.6506	27.5355	54.9432	44.9244	6.22527	19.6362	43.0916	30.369	33.995	39.4478	47.0023
1553432_s_at	6.73525	48.1639	4.56214	23.9117	44.8097	23.1742	39.4658	18.5181	54.9903	42.956	28.4631	8.23765	16.4642	19.6859	53.5391	40.8132	29.3781	10.763	24.486	31.7827	9.08904	63.2567	36.7279
1553433_at	16.732	1.98971	1.04822	1.81319	5.43824	2.07565	1.65094	14.9566	13.3013	7.31954	3.20619	1.57385	2.41491	10.4112	22.5072	0.581326	1.77871	21.2976	1.79768	3.13286	7.86168	13.1298	24.5636
1553434_at	32.2403	36.928	45.6819	31.9908	44.2936	36.2081	24.0042	9.80193	31.5948	32.2909	3.19116	15.3993	32.2696	22.9876	31.958	27.4125	19.299	33.4415	40.4604	34.9397	27.5255	44.339	34.5706
1553435_at	5.68464	10.4105	6.46251	8.51999	32.9175	3.10323	9.63299	38.5619	4.73323	4.75908	25.5793	15.3619	4.62583	5.51515	7.03052	3.82265	3.15536	5.03685	12.0625	4.00646	6.66188	3.96619	5.11009
1553436_at	52.1114	25.9672	67.9448	44.9133	34.6493	57.7746	64.6519	51.6046	50.375	47.5952	72.0156	25.0846	36.8363	16.4907	46.23	29.5168	29.7708	53.136	35.5188	49.4401	71.874	45.4682	38.3964
1553437_at	9.36089	32.5822	20.322	6.49101	10.5662	15.2244	26.0915	8.62815	17.9603	36.2206	11.0246	13.2887	13.9129	5.71233	34.6736	6.2402	12.5338	45.2517	23.2204	10.5728	12.8218	6.96208	60.6551
1553438_at	108.936	67.5272	111.153	127.383	139.041	97.6064	89.8651	160.446	199.679	143.693	86.8764	150.801	121.367	115.064	101.884	115.265	143.91	136.675	154.747	97.7687	102.678	126.085	160.145
1553439_at	60.9608	77.8952	22.3521	37.1694	18.2349	39.1482	21.881	56.1936	49.2431	69.6366	32.8055	30.6557	27.0533	39.7601	13.1775	30.0852	18.031	48.0067	18.5918	15.7352	60.5446	41.3666	34.0138
1553440_at	17.8163	20.3901	9.57844	15.4635	29.1269	15.4681	3.27386	22.7474	29.8333	18.6074	15.8463	13.4408	15.6199	15.0049	3.73322	29.8135	25.8053	22.5926	21.5433	3.97725	24.6827	8.95261	14.2137
1553441_at	19.0392	4.39164	6.6135	18.1985	17.3259	3.72069	2.68576	13.4746	21.2743	13.8271	4.01539	14.8223	31.7271	19.9574	11.5902	28.1058	27.7108	2.81636	15.8594	27.2515	14.094	14.3957	15.9588
1553442_a_at	13.1474	7.64932	5.61098	1.79745	19.6034	31.36	9.47265	2.2953	28.8261	26.0708	3.12874	7.61245	8.93481	17.3178	17.7944	27.9911	20.1771	11.7577	27.7756	24.3595	5.56337	14.2894	11.6965
1553443_at	27.9387	18.8893	9.17887	19.974	34.5632	15.2388	15.9203	3.70879	23.9158	21.3725	6.25501	8.44954	15.3738	27.5459	15.9797	21.5206	27.4085	30.9292	26.5097	55.3646	19.7774	13.5655	14.5322
1553444_a_at	8.12501	7.56925	14.3923	17.8261	50.2247	47.6189	13.8988	43.2065	14.6318	17.6974	16.164	17.453	40.5857	12.3966	20.3894	14.2631	18.9826	57.2263	11.7352	9.36579	12.2603	18.5263	7.59977
1553446_at	17.6711	9.19042	58.1044	11.4899	34.1653	30.8131	41.5928	32.7715	47.2359	22.065	18.4419	49.0544	36.1026	6.64944	48.5653	41.8746	19.797	56.6907	9.91863	2.42483	28.7936	4.44234	51.8399
1553447_at	2.20411	23.6122	17.1103	6.09316	32.2218	6.63672	7.40081	28.4258	4.29115	34.322	22.3441	32.0652	38.6911	32.1579	5.96394	5.26155	14.5067	12.5302	10.718	38.1481	27.4405	42.9291	19.1435
1553448_at	2.55169	8.21127	2.07812	5.8475	1.38636	2.79061	1.9758	2.81301	1.93946	1.64859	3.77205	4.15312	2.66981	2.47123	5.38739	2.19805	2.46104	21.5485	7.3127	3.88839	2.31577	3.11545	3.03568
1553449_at	35.0051	5.19993	1.90322	3.53318	30.3178	2.29524	18.3038	11.4872	34.2202	19.1689	1.86683	2.48659	1.74975	18.143	2.86144	1.77079	39.1954	2.60343	9.36767	23.84	9.28982	1.87321	1.58005
1553450_s_at	3.01455	5.66787	9.43081	21.2044	12.7569	21.2489	8.81399	7.81225	18.7441	3.41076	1.74627	22.64	9.89357	24.4859	8.29635	21.2993	33.2138	4.6506	19.3847	6.50341	25.98	3.43076	18.4385
1553451_at	3.637	2.25018	1.69901	14.854	7.92335	4.14535	1.92266	15.4055	3.78061	4.25951	3.76735	6.88599	3.37461	2.91384	29.2018	12.6813	5.05801	18.7246	2.57129	4.55682	1.45258	4.82059	2.03445
1553452_at	32.6609	16.0819	23.5386	4.36012	23.8325	13.0651	7.24224	27.5474	45.8722	16.2271	33.1771	47.2295	58.3519	13.3433	39.8	23.3156	37.276	5.30232	21.1074	11.0044	38.3298	12.4345	25.6251
1553453_at	67.8852	58.0774	21.737	41.5792	56.3557	39.3166	35.5206	26.3294	50.9734	72.5752	36.1639	42.258	37.8955	41.7693	33.0184	43.993	52.0813	55.6043	46.3703	34.7837	59.8344	62.252	49.7542
1553454_at	22.52	2.31255	20.1158	17.8139	22.6248	19.8687	3.84635	24.0719	17.0838	8.59532	4.12196	13.4803	9.28757	1.68193	3.64545	21.8112	6.52532	15.9816	2.10011	17.696	20.7642	1.54041	8.98208
1553456_at	36.6573	12.1209	22.5158	10.4094	20.4476	22.0001	9.34481	16.6992	32.5691	12.4863	5.25715	35.5707	15.2352	13.8305	43.1564	40.7533	32.7428	17.4069	27.2156	10.9398	36.0973	21.6245	18.6388
1553457_at	5.7733	9.08542	8.14181	5.07772	5.19971	7.75783	8.64475	2.34175	3.35753	4.11729	3.61608	6.58981	21.6236	3.52407	25.5246	24.0273	5.54729	13.9208	2.69923	19.3512	16.1888	3.46663	4.40775
1553458_at	41.7963	14.509	34.707	9.62452	15.3132	7.80538	6.4818	7.01206	11.8656	54.5807	10.2805	10.9665	39.9351	10.2774	12.4238	24.5176	30.315	13.0115	33.5555	6.37566	48.1901	11.067	32.6935
1553459_at	19.9354	13.2346	11.4351	14.684	12.0606	11.5875	21.7032	58.0625	9.51647	13.0892	12.8281	61.753	12.0975	9.53422	14.317	59.7769	19.9395	4.64606	8.28676	8.94584	27.5538	5.56419	12.2278
1553460_at	10.773	20.8732	11.9777	13.1334	5.238	11.4172	9.48206	14.3976	16.6466	10.5566	4.60357	16.8574	5.6207	12.8331	3.64037	5.25664	12.6714	37.2946	13.6947	3.85002	18.4466	39.8921	9.35309
1553461_at	4.91274	9.8732	17.549	35.5251	22.9605	35.1064	23.8116	2.83737	16.6795	4.69649	5.92535	36.7077	15.5364	27.7916	14.9442	20.6978	3.38957	18.9342	25.2939	14.3162	1.87201	4.24488	23.0868
1553462_at	32.2188	28.0448	36.1028	50.0168	42.8462	55.1453	22.7809	19.4234	15.1983	2.7719	26.9126	23.4171	25.3141	22.3615	38.6979	17.1485	32.6139	37.5163	37.6188	52.6819	39.4437	41.3081	40.2696
1553464_at	8.77674	7.62599	9.04894	2.87987	30.9278	17.8926	6.58305	6.6519	7.37901	6.27546	12.8836	6.60109	7.30246	5.2855	3.81428	4.45915	12.94	5.54554	10.2394	16.1304	15.6297	7.10947	3.43842
1553465_a_at	4.68746	7.10754	2.80079	2.23303	2.45135	1.28546	1.71146	14.4026	2.18109	3.31463	5.73262	3.60919	8.85817	3.20774	15.7783	4.68983	6.56573	11.532	2.56593	11.4361	25.7675	2.64536	1.60222
1553466_at	62.8604	67.3257	92.7259	94.4175	90.1619	87.8984	86.5859	69.091	107.602	78.9865	38.6718	56.2918	96.3428	80.4757	76.6294	99.712	82.3444	93.3911	90.7731	103.912	93.0148	87.7321	60.9836
1553467_at	47.0367	28.632	31.0573	22.0922	19.7265	37.263	30.2945	16.8682	33.5243	24.2933	12.113	24.0705	18.629	19.1142	5.2815	18.8132	22.2583	36.9337	26.682	19.6917	23.3949	5.8265	10.9387
1553468_at	15.4108	6.88724	28.0692	9.0626	16.5371	13.5619	18.4548	17.2926	20.8021	23.176	11.5298	36.0532	4.75724	12.2417	28.5484	27.2619	30.4746	4.01713	4.73823	30.9337	30.066	21.5305	4.44138
1553470_at	37.1784	34.0551	15.7848	35.5921	26.5035	29.1102	22.4193	32.0145	56.1649	30.8656	32.7471	27.7056	40.8288	32.4589	21.2681	52.8353	24.885	40.2204	32.7076	33.7707	32.1597	46.2986	32.685
1553471_at	3.53267	33.8454	6.93598	3.81472	29.9985	8.61102	36.6045	29.1311	6.47496	27.9882	5.41342	24.729	32.3309	7.77175	17.4981	30.3978	6.1079	24.0149	27.9746	35.6041	18.3384	5.0854	8.29855
1553472_at	15.829	28.1267	22.6421	16.9513	21.1341	25.4493	18.124	28.5992	10.4095	28.3227	22.2696	12.6156	7.26557	5.17447	27.8751	24.9888	21.2168	14.1886	10.7179	12.2092	18.3811	24.4019	23.0129
1553474_at	9.36346	29.1525	12.1163	13.5057	10.7423	8.00469	5.77355	25.9098	2.84386	2.66684	9.07675	9.22371	14.3222	13.9077	5.65698	11.8374	7.381	22.925	2.58916	16.7241	36.8564	2.79208	8.38517
1553475_at	41.8056	8.51061	39.6484	15.514	12.2337	5.27212	8.29048	34.1981	9.94374	43.6688	43.5169	10.2303	8.22709	3.39362	7.81567	10.293	9.34603	46.1297	14.228	5.34958	64.8232	6.33659	5.58565
1553478_at	24.2998	40.0092	36.9385	21.2216	41.8405	40.496	18.4575	33.8496	33.5815	40.3496	25.7139	52.2952	22.532	12.7078	44.8666	34.5548	27.9758	64.1161	11.0304	29.3466	61.2251	46.2551	25.3801
1553479_at	61.1131	30.2196	21.4718	26.9299	46.8395	16.7407	20.5187	31.0909	42.9673	62.028	29.6333	18.1745	26.6537	43.5797	18.8069	27.2226	41.1173	52.0124	44.1033	17.8057	22.5064	20.993	44.1561
1553482_at	13.8474	7.17912	6.33691	6.67904	22.6986	3.17073	3.76662	6.69876	6.3283	5.20693	3.50953	6.05961	4.01918	3.5161	3.75043	4.11052	2.84029	5.50709	3.56264	4.14096	60.8278	28.1253	4.81923
1553483_at	15.2765	10.852	16.5338	8.04621	15.8056	8.95322	8.96294	6.00966	48.0777	42.0956	9.00619	9.75683	12.9404	11.9502	12.0463	8.77073	24.4193	32.3566	35.9555	4.02872	11.2705	42.0646	31.639
1553484_at	18.7615	28.0907	15.7237	1.52839	30.3249	7.89611	0.811022	8.09933	12.6445	4.3155	14.7385	26.6609	26.0563	17.244	37.9465	17.3567	10.9235	31.4716	15.0433	5.35749	15.0034	28.738	11.8854
1553485_at	23.9198	19.347	29.4746	18.5616	7.90164	42.4398	6.07067	3.51573	4.34642	23.0791	3.11264	20.902	7.56718	20.828	15.6928	8.11719	5.2245	33.6612	26.1236	35.3768	19.0559	29.1061	32.9179
1553486_a_at	11.9332	5.8774	17.154	13.1933	4.43506	3.46279	22.7462	19.5098	4.22912	8.80408	14.5701	3.94174	20.0978	9.66788	11.241	21.5636	13.9	2.7972	8.04714	17.7798	34.7122	13.7324	3.19977
1553488_at	6.3368	9.63876	6.29011	11.7053	13.1587	7.89062	4.66016	11.0037	64.5138	8.1344	8.22052	10.2104	18.5196	31.4481	8.13088	37.9377	81.2789	12.218	9.32049	5.71898	73.2013	3.11115	4.91622
1553489_a_at	6.30803	8.97855	5.90235	3.29179	6.76457	6.55937	5.78023	6.33257	4.96541	10.7146	6.17116	6.55441	7.09046	3.28072	3.59893	4.13989	5.9905	7.09272	6.56898	2.96722	3.55362	6.54218	4.28286
1553491_at	30.8808	14.3317	37.7923	21.0839	45.2262	43.5088	32.0601	29.4692	21.7088	63.178	45.5986	25.1447	43.5325	23.1703	38.6779	29.9196	26.1947	29.6364	12.0153	41.9983	45.035	20.9061	31.5944
1553492_a_at	4.19706	17.46	4.0991	4.38354	1.20679	8.48783	9.85663	4.06633	1.29653	3.95315	10.6651	1.5055	2.3384	6.6002	3.21358	9.66788	7.64494	33.3791	3.48589	2.88551	3.0423	2.4205	1.11113
1553493_a_at	27.8941	9.27379	6.76997	38.3728	43.5901	11.8107	26.4379	31.5189	16.8652	11.331	16.7202	68.6215	32.4417	5.83549	14.4037	9.98984	15.5276	58.2631	8.73957	10.8618	36.0528	8.01724	64.4196
1553494_at	2.54366	8.94653	2.58424	2.26344	1.21235	1.18016	2.08636	9.8369	1.26766	1.28116	1.45575	1.82862	1.4298	1.05139	1.37898	3.23737	1.13305	3.42523	1.85931	0.904757	1.35846	1.31009	0.896786
1553497_at	7.15796	50.0375	5.33074	6.22221	38.5611	3.78773	6.76364	9.57262	3.95722	8.5313	5.23641	21.3507	6.3001	4.43083	11.5508	5.6514	6.36838	20.2216	4.40925	47.032	19.2924	19.2218	4.41027
1553498_at	22.8086	77.3334	43.7871	50.6009	65.4504	39.18	61.7002	49.7847	70.7636	31.2538	37.5976	53.0234	35.7596	50.784	25.6806	27.7412	45.4562	35.4831	38.8947	7.38103	19.3089	45.5799	59.4604
1553499_s_at	29.6147	27.8549	43.5364	6.25523	39.0465	44.3109	48.4719	64.893	34.5283	29.9961	41.4823	72.0606	10.5649	27.1244	4.92968	25.2379	46.3833	16.414	27.383	13.3299	25.1608	21.9101	37.6657
1553500_at	10.8684	13.3199	21.8373	22.6745	19.9188	14.1578	10.3641	42.2575	12.5317	30.2954	8.90182	13.2451	7.98245	7.49557	2.6299	3.28415	9.14675	13.2816	3.79431	6.4564	14.5807	6.75189	31.3072
1553502_a_at	55.0823	42.8838	49.3778	47.4446	11.73	19.8492	37.2431	44.7647	36.8304	11.548	10.0662	53.6274	33.859	12.3005	45.1484	39.6801	28.3826	41.1333	45.1119	47.2746	7.35471	44.7158	51.7084
1553504_at	24.3198	21.0089	23.1582	13.2788	32.9547	17.7359	47.689	7.436	25.6231	37.2496	32.6305	32.0716	40.8834	21.3432	36.0587	31.0698	24.2567	45.317	28.3939	22.3887	37.0603	22.9853	26.0244
1553505_at	30.7717	18.8056	5.30626	18.824	8.27199	26.6225	13.9844	21.8358	23.6079	38.7708	3.39706	5.62986	14.1418	7.74196	13.2422	34.6487	33.8148	22.3179	7.06971	24.8001	20.2392	46.0631	41.2109
1553506_at	47.5298	19.7365	28.228	76.6455	40.2663	32.2872	5.04778	44.5278	39.4207	46.12	31.5838	14.557	34.9105	42.6086	32.6544	39.591	32.1116	37.6826	35.1596	43.7263	26.0283	18.6818	45.0183
1553507_a_at	78.886	123.564	95.7918	69.4811	88.7867	57.0286	84.0567	67.9196	124.998	53.129	80.3097	127.855	115.016	97.6434	63.6657	38.031	83.8572	145.59	47.0963	59.7713	98.2677	53.5612	111.725
1553508_at	31.0669	77.7706	24.0805	24.1248	25.2018	35.1619	35.7425	39.7024	5.8371	54.8826	31.3894	35.2526	22.726	39.899	20.3749	40.8837	28.7535	54.333	15.8621	57.8821	8.60504	44.7925	25.5395
1553510_s_at	877.809	862.355	927.548	836.972	878.15	834.437	889.006	991.999	846.799	744.112	724.436	687.545	1001.56	901.277	886.256	878.179	918.062	882.865	936.183	895.44	943.318	878.315	873.456
1553511_at	52.436	73.3496	48.8222	50.8351	33.0052	34.616	28.3793	57.6882	48.5776	54.7785	28.0315	56.4652	15.4719	25.8223	14.922	43.3805	25.5232	52.212	60.016	5.42968	43.6485	35.0484	64.2898
1553512_at	44.5124	74.2791	62.2008	65.1856	28.4958	54.4161	23.6169	24.0728	60.5677	32.7571	20.2129	44.958	30.9559	44.4909	50.0164	44.3335	50.0092	82.9811	46.6311	64.6303	47.865	55.2536	34.2849
1553513_at	15.5361	25.9776	16.8719	30.4135	18.0501	25.3307	7.95859	28.0622	13.2261	18.1315	8.14014	30.5213	2.77953	19.4609	22.5889	22.949	41.9006	4.39023	15.7918	2.708	32.083	6.16847	15.9515
1553514_a_at	21.1102	3.62559	32.3538	11.4901	10.5165	34.672	33.6424	31.752	22.1163	14.4814	25.6577	7.33838	29.5166	2.98327	38.6981	9.1514	3.7198	18.4278	33.0656	26.3461	22.7399	32.9932	4.32174
1553515_at	31.1135	27.4998	10.3905	32.4094	38.9072	16.4263	26.9617	32.1019	24.4335	4.09017	33.0561	13.3969	30.1278	6.80271	26.1353	18.1147	9.0221	28.8439	36.8506	33.6399	2.71357	37.2897	29.0145
1553517_at	4.38177	4.85209	3.83794	10.733	47.3568	4.83922	37.5588	7.46527	2.67223	19.5439	14.0761	15.7461	2.82871	15.9291	9.1819	7.56197	17.4161	14.2649	13.1588	3.80574	10.7159	6.66378	21.9595
1553518_at	6.36248	24.7123	17.591	19.3539	34.2364	5.99089	18.9841	9.08072	35.8063	26.2162	34.9482	36.9332	7.61919	36.8705	29.9109	3.17395	5.50994	45.8271	32.7081	60.0996	6.23872	27.5008	20.8107
1553519_at	2.85266	2.1433	8.03647	5.3128	1.46535	4.08077	5.66597	2.32652	8.88853	2.02199	8.71307	5.15516	1.85646	2.2722	11.7649	8.63943	23.6319	8.24506	12.5215	17.0328	1.94618	7.87441	11.517
1553521_at	26.6654	50.8468	45.6457	33.7406	31.504	46.4793	46.4533	38.6242	43.8475	46.0618	26.8492	31.0603	34.3026	49.6896	33.7238	38.3866	51.5127	62.5369	46.7026	33.2531	67.1282	40.4998	35.2292
1553523_at	39.4201	40.4151	50.3039	27.9142	17.6792	18.6801	53.0245	23.9663	15.132	11.8216	39.35	24.9131	36.5569	28.3765	40.6765	43.512	37.5453	52.747	42.9616	30.0824	62.1438	24.3363	40.5137
1553524_at	9.53501	3.9006	7.59494	12.429	18.2566	18.4055	14.4395	6.79189	13.2312	19.2418	3.77705	19.4824	8.99197	22.1336	35.1448	3.89305	2.00815	2.37971	1.99825	17.4638	2.27804	9.67307	12.6832
1553525_at	13.8716	10.9125	58.6824	25.8482	45.4162	34.5101	51.6456	18.632	67.0394	66.4719	35.6488	55.6723	25.998	28.947	49.3076	18.897	50.8089	63.7757	37.7308	36.0993	59.1101	9.96578	42.5391
1553526_at	4.7184	18.3666	29.5524	16.8999	13.1182	13.0407	11.9085	11.6038	11.8967	58.183	26.5638	54.7717	12.5559	67.7703	26.8846	30.3097	29.8186	71.4967	10.7396	19.1511	12.9396	33.9558	11.3694
1553527_at	38.8456	85.5694	38.7133	20.9193	53.8911	37.3287	28.6271	28.285	43.6699	31.6881	24.0698	36.8525	7.42342	57.0754	20.8111	59.6275	57.6456	37.7629	54.2234	19.4211	45.2638	20.0809	83.6506
1553528_a_at	595.16	704.238	614.29	905.436	757.366	809.918	657.812	510.99	550.658	841.463	785.963	863.354	482.692	449.129	553.875	677.695	659.066	635.894	427.496	361.827	456.384	628.126	561.962
1553529_at	12.0087	6.20003	4.93239	4.00629	3.33322	4.54482	3.48135	10.8076	18.039	31.5669	4.59757	10.8926	23.6121	39.6537	4.66846	9.49801	6.91565	23.7028	31.4274	11.3238	24.7563	6.03201	35.7988
1553530_a_at	7136.47	7811.03	7635.39	7488.61	7210.72	6948.71	7606.72	8312.75	7522.76	7869.24	7269.69	7857.85	8121.53	8511.97	7886.45	7104.09	7085.39	7659.49	8647.11	6945.55	9317.04	8766.95	9963.03
1553531_at	10.5015	16.3096	25.1543	9.46144	1.84484	8.99799	12.8081	24.6474	21.6165	20.4741	2.87975	11.4589	24.0262	29.8015	18.3908	3.32227	4.32168	6.18786	6.31231	27.7857	2.31484	8.27048	4.40438
1553532_a_at	15.5537	15.468	10.2336	17.6841	16.2587	4.21646	3.63616	15.9684	12.2227	62.9273	33.3611	69.0829	8.61987	6.64201	10.2352	24.1878	5.50506	14.9264	11.771	9.60844	20.8781	10.649	12.8266
1553533_at	111.517	114.771	92.2104	104.162	103.296	61.8484	69.778	122.685	70.2816	64.7707	64.494	79.2036	97.7284	84.672	95.457	72.224	89.3989	86.9853	104.783	86.65	88.9527	93.7452	60.4603
1553534_at	17.9388	13.2637	34.7616	28.3832	18.5277	32.9876	16.5152	13.5645	26.4734	30.9909	13.0941	31.0765	40.1279	33.6798	26.9488	22.2515	20.0507	17.289	26.1136	28.3719	42.0312	13.5611	23.4082
1553535_a_at	551.82	475.794	521.434	559.799	671.005	519.331	600.677	673.065	575.821	577.265	665.207	569.674	592.469	576.236	534.563	620.015	634.823	613.115	655.342	468.552	491.223	729.867	817.123
1553536_at	35.9721	53.5248	42.734	50.4523	52.7916	41.7196	39.56	45.2277	64.5921	70.6149	44.0885	60.8055	42.8784	33.2559	49.0616	32.819	53.3847	36.8298	41.9136	17.4061	29.985	53.103	26.5023
1553537_at	22.2192	33.6965	35.563	44.3146	41.2326	40.5454	48.4684	44.2459	49.6931	38.7343	9.24307	36.9193	27.3779	29.0777	14.4846	34.7499	20.4988	35.1186	47.8248	73.8568	56.4454	40.0911	36.7403
1553538_s_at	28520.9	28529.2	32224.2	35346.4	37897.4	31701.2	31229.6	36166.8	29023.3	31331.2	31221.9	32142.1	34611	33488.5	29664.1	26141	28196	34953.4	30060.7	42204.6	29930	29112.7	41663.7
1553539_at	5.5476	9.31406	11.6769	42.5633	28.5774	6.90538	24.8691	7.42805	11.4798	11.708	8.41078	6.17306	6.403	6.2259	2.6043	5.3158	6.28254	9.62954	8.4653	10.5478	11.9024	4.91291	5.18188
1553540_a_at	55.5039	87.0463	62.3257	26.086	54.2766	56.9282	46.4073	80.2441	48.1289	34.36	15.4807	57.0368	73.5329	52.5999	102.971	54.2507	123.327	52.807	105.862	59.4882	77.7187	47.8297	65.2787
1553541_at	5.43934	8.45633	5.81458	25.2182	3.94766	3.14766	4.37966	3.84823	5.22993	8.32023	6.87495	5.72256	5.95622	3.29413	4.21029	28.977	4.66878	4.62193	8.01744	1.40056	2.48007	3.76583	1.11146
1553542_at	154.12	79.1617	105.134	145.936	160.409	103.025	112.07	85.4188	68.0435	148.429	99.7235	120.441	117.897	91.4297	91.0471	161.048	128.154	99.6096	122.443	113.704	86.2859	98.181	112.317
1553544_at	21.4657	58.7159	51.6194	11.2816	12.7929	18.0197	5.57849	10.5218	7.97522	81.3527	4.89252	28.551	10.8745	40.98	36.4777	30.4198	84.4573	6.79016	51.8591	5.13626	8.7365	20.8099	7.86019
1553545_at	5.86002	2.13241	1.89652	2.40597	3.28337	2.21411	14.946	5.13739	2.38193	9.08091	5.45084	3.63266	13.1278	1.42444	3.20698	1.37536	4.73643	2.40287	13.9431	2.83088	1.79312	3.45347	2.65937
1553546_at	12.2802	2.45686	0.684166	2.40407	2.08074	1.86948	2.63527	2.20683	0.939381	8.18416	1.31849	1.2837	1.74422	1.85815	1.2977	1.72789	7.39374	7.66909	10.4447	9.19633	1.51303	1.51656	1.49773
1553547_at	58.1477	34.9245	38.795	36.3001	27.1961	57.8068	44.3808	31.8762	52.3941	33.4713	39.649	43.909	40.8384	49.8019	42.3175	34.8267	43.0298	48.2363	49.4249	47.4416	34.4458	29.2695	34.7338
1553549_at	2.65718	5.20265	5.41341	1.69421	6.60753	7.4834	2.7484	2.28603	6.36156	17.216	8.07509	8.36419	2.49633	2.04272	2.47318	2.49175	16.6595	1.49525	3.75779	2.43398	7.20696	2.26569	2.77839
1553550_at	4.91454	20.2	27.3494	37.8858	23.3112	16.8256	27.0199	18.988	6.07868	22.2554	27.7486	3.66945	24.0485	27.0338	45.9763	13.142	17.2098	24.4774	6.22774	4.37524	12.127	30.8112	22.5552
1553551_s_at	20501.3	17228.4	21047.8	23234.5	22716.9	21881.1	21720.1	22591	20004.7	20372.3	22533.8	19932.9	22884.8	20879.7	20378.9	20411.6	20709.4	22338.1	19911.4	24011.4	20524.6	18968.4	24122.7
1553552_at	9.38985	16.4136	21.0155	6.28261	6.57705	6.72137	5.62133	2.66242	2.56897	5.04809	3.57463	6.66109	5.61929	9.20674	11.0145	31.5263	49.796	6.88783	9.56961	25.1239	11.863	3.04127	4.15834
1553553_at	40.4005	33.4661	42.6581	24.1588	26.1423	16.7964	31.6544	31.2276	45.8682	41.0371	56.609	31.9827	17.0829	32.6395	45.3846	23.9295	29.2054	41.8984	44.2804	44.5617	52.0963	51.4667	26.2638
1553555_at	88.2509	32.5471	52.4475	53.382	59.2778	66.9929	15.3106	56.2645	8.71315	43.7664	31.9497	92.9436	56.4793	75.1154	13.5792	55.0574	77.2995	16.1328	48.3484	74.3414	41.0035	57.5075	86.7471
1553556_at	11.417	10.4426	5.38659	24.6009	1.86511	19.6345	2.78206	26.652	14.173	30.0077	10.4003	12.831	20.8715	2.81871	3.67976	16.8076	4.77156	24.4916	22.0559	13.0997	18.7458	25.3227	16.6057
1553558_at	24.5388	4.63064	3.45251	51.5334	2.59986	4.57326	6.83674	4.80631	4.48305	2.22919	6.01826	3.96668	16.5615	11.2017	31.9459	19.4025	5.08898	12.9876	36.647	4.30915	20.0019	2.93397	3.83646
1553559_at	104.432	100.516	106.22	93.8096	99.5663	48.7079	95.8754	133.742	114.076	128.216	141.701	128.879	91.2767	98.6886	109.522	89.907	119.845	147.249	88.9023	107.458	103.262	108.087	136.71
1553560_at	21.7733	32.6287	25.3832	23.509	30.1426	27.8962	34.1419	23.4394	14.8097	28.6632	20.5078	31.8697	42.1176	19.2628	19.6906	17.5259	55.906	17.3895	18.4961	18.0223	27.4509	29.2711	4.91425
1553561_at	37.3465	45.745	36.5339	30.8472	49.026	49.1919	48.4961	36.8505	56.1373	43.1258	23.1099	27.0997	50.7914	22.759	42.5499	37.8096	34.0311	37.455	25.4025	30.4048	30.8487	20.6185	33.4685
1553562_at	34.2163	52.9145	25.4628	33.6752	40.7871	28.2835	22.7367	32.2798	37.8273	45.4561	47.9184	32.7831	51.6856	23.2064	31.9103	27.341	51.9479	31.9171	35.1967	29.5577	36.07	34.5714	38.5494
1553564_at	86.3685	59.4684	48.2469	77.7417	91.3012	64.2678	54.9012	55.9629	51.8071	54.0756	53.682	55.6751	64.4346	49.5261	67.8143	49.4726	53.5152	74.8854	71.9234	68.9053	44.7101	57.1071	46.8149
1553565_s_at	61.5459	57.9881	43.3805	40.7475	26.999	18.5256	43.352	50.0209	55.0414	16.5674	46.0983	46.3552	69.7324	56.5505	64.3033	65.2122	71.2636	34.2207	64.5987	69.3973	54.8115	52.5146	41.1533
1553566_at	32.8539	34.2973	10.0884	35.2748	8.13025	5.79564	24.7788	1.83016	40.6298	25.716	12.7239	13.6605	10.4241	34.0395	22.3471	38.3613	7.44119	52.6607	68.7376	9.85857	31.2395	7.48484	4.78774
1553567_s_at	21207	24638.4	23036.3	23605.5	24852.3	23062.9	21502.9	24442.3	22832.2	23417	23355.4	22867.7	24088.3	24472.6	21115.1	19523.3	21790.9	24680.7	24088.4	30023.7	21588.6	21197.2	28120.5
1553568_a_at	26.1687	51.8748	54.959	19.2438	78.2416	39.4088	52.8865	25.2704	42.984	33.3272	8.12528	59.8242	32.1901	61.0278	47.3313	40.9576	52.2547	70.5493	27.8504	18.5328	56.3112	39.9329	48.7095
1553569_at	27903.8	28498.7	31276.3	35628.7	39346.1	34673.9	32566.5	37971.7	30260.8	31689.4	33511.9	33637.8	33379.6	33896.6	30445.4	26295.7	30529.3	34778	30478.1	42713.1	29742.8	29276	47354.5
1553570_x_at	29177.1	29351.3	32322.2	36319.7	39799.5	34737.9	31793.1	37474	30434.4	31844.1	33996.9	33376.6	34649.1	33717.7	29971.7	27835.4	30631.7	35682.8	30772.2	44347.5	30151.7	29790.7	45611.2
1553572_a_at	11.4909	16.3545	15.8719	37.4408	16.3875	19.3966	10.6557	13.3796	7.56006	16.7914	13.5841	26.6436	27.5688	18.8579	15.6177	10.0976	9.79848	22.4237	10.7091	22.929	18.6629	19.5509	14.8459
1553573_s_at	5.71737	1.56045	7.57399	6.113	6.42964	6.52509	15.7676	10.448	35.9251	8.92852	9.15983	20.5023	7.10723	13.5107	17.353	2.92719	4.58278	9.29583	18.7057	6.43603	14.7606	16.7389	4.52898
1553574_at	53.5304	22.9561	33.444	35.4057	62.1081	71.1954	58.5025	51.1776	33.5727	33.7295	32.2056	36.2884	52.3116	60.511	49.8323	64.2078	75.3929	46.9544	53.8153	51.3693	63.8118	59.6586	105.258
1553575_at	954.782	1146.4	1114.55	808.792	742.026	837.491	1231.31	1189.93	1187.24	950.024	901.94	934.399	1102.16	1104.49	863.6	773.696	771.563	799.288	1045.21	1304.41	1157.76	761.172	823.635
1553579_a_at	7.85096	17.8244	3.14661	27.611	24.5045	15.1727	19.3725	27.8811	4.70899	5.72859	9.59507	17.4638	14.8275	31.6092	21.4819	8.04423	16.3573	15.919	33.8436	1.25225	8.16397	24.0167	3.68981
1553581_s_at	2145.11	2272.34	2088.46	2089.38	1995.61	2059.2	2479.18	2268.47	2598.28	3578.74	3931.92	3425.93	2469.5	2480.57	2625.98	2229.45	2366.5	2182.44	2994.91	2736.19	2852.21	2646	2533.05
1553582_a_at	50.754	55.3992	42.1082	51.1921	18.3771	31.1085	7.10033	37.9657	35.8792	68.6229	65.0789	43.3	19.4043	48.8245	40.4161	64.2954	25.3267	38.1606	6.65275	50.9826	69.8287	51.468	37.8365
1553583_a_at	32.4366	18.3615	76.9855	19.6211	17.2159	52.7563	33.1567	31.1295	40.5093	25.2729	30.8847	32.7741	38.0206	14.3026	27.3544	30.6504	41.1569	46.1114	30.8477	17.2516	34.4341	15.7181	47.0161
1553584_at	40.9255	78.2003	28.3578	44.8789	45.3546	39.4684	33.8988	30.4305	44.2319	45.2653	52.9179	33.8175	44.5758	51.0477	50.9675	39.2099	43.3281	78.2418	54.4454	44.3117	40.793	45.0766	14.4917
1553585_a_at	8.28061	52.157	6.5023	61.611	60.86	47.2252	7.35094	60.048	52.5607	56.999	56.5246	51.8076	60.3425	26.9838	64.5448	8.31415	9.9146	12.1039	34.1655	53.5805	45.4586	71.7771	55.1741
1553586_at	57.4485	76.2409	59.3007	49.4828	71.1074	106.951	49.8579	53.0283	41.7995	69.0617	52.1604	52.6098	104.357	52.9124	39.5472	55.9004	89.2595	61.8556	47.4264	39.7622	60.1756	62.0537	77.3694
1553587_a_at	2420.58	2306.7	2723.93	2852.54	2785.48	2618.39	2451.13	2709.49	2510.95	2811.34	2829.11	2855.48	2448.14	2049.81	2269.47	2337.58	2496.58	2281.8	2032.2	2018.05	2150.55	2196.42	2287.64
1553588_at	25978.2	26681.2	28744.3	31792.4	33531.3	31210.9	27710.5	32274.7	27339	28166.4	29880.7	30317.4	30658.7	30555.8	27601.3	26646.2	28489.1	31969	27100.1	37457.9	27917.5	27829	38630.4
1553589_a_at	522.644	396.823	480.857	737.744	792.777	710.363	792.908	874.903	905.414	1178.22	1099.21	1060	298.386	308.89	346.604	521.784	550.633	526.623	284.986	429.067	299.958	1205.49	1311.38
1553590_at	3.76752	3.93616	4.63336	8.99904	3.5227	4.72548	5.08946	5.31193	5.03579	3.83741	3.40139	4.87657	6.03454	5.96642	3.5749	3.58954	3.81356	9.8103	7.0894	5.43655	5.29136	3.1949	3.05304
1553591_at	13.6195	11.8558	14.0016	9.72571	14.446	47.7716	9.04286	4.72502	21.9757	48.4534	35.3202	37.7532	15.1244	15.914	6.32779	8.16294	33.7767	6.52237	18.7196	32.2752	5.38071	14.9555	59.4695
1553592_x_at	5.72612	79.3032	46.6462	57.0468	86.9431	91.8705	38.9545	16.1983	60.0419	65.4112	48.6005	73.253	69.4852	45.3758	26.2832	66.2071	39.4293	95.2858	34.0273	11.3129	31.7484	30.7605	28.1549
1553593_a_at	40.4503	15.1147	11.5168	12.6344	11.4468	36.1631	45.1148	12.648	30.3751	27.2188	12.1426	6.63885	41.6404	33.6625	3.45363	20.9587	4.46817	26.4985	21.0518	27.9325	39.6023	15.3698	27.5007
1553594_a_at	88.4603	197.188	191.752	205.775	176.262	161.829	96.5815	152.156	212.391	228.503	166.385	284.263	147.778	83.6906	120.585	106.095	206.114	192.085	119.373	108.603	203.462	131.536	107.303
1553599_a_at	79.1992	51.5932	45.6384	73.3013	68.0831	59.8858	54.8903	71.3474	90.7907	30.0907	45.4223	61.7383	47.2567	70.6663	53.3197	63.8887	63.7549	60.3629	64.2915	43.9646	78.8001	60.9922	62.7757
1553600_at	14.5932	5.86217	4.41412	19.4793	30.2812	3.93964	12.5427	6.27917	5.9309	7.88252	35.0857	3.02614	6.37499	18.8427	36.4079	20.4894	15.085	5.94206	8.59663	24.1513	8.74325	5.45357	4.49855
1553601_a_at	5.75802	25.2923	7.85935	3.1387	12.6719	8.57713	9.21472	27.8023	19.168	25.2237	21.7354	16.1452	5.76463	13.7366	22.27	26.75	4.17026	5.3283	4.00989	27.7375	23.4134	15.9721	5.76274
1553602_at	67.578	82.8612	93.7416	33.3523	64.2112	67.9299	38.1589	87.2015	56.2596	249.18	292.227	260.74	70.8781	63.8919	62.3326	67.1357	62.4287	83.1091	62.8401	69.3369	53.2629	42.9076	32.2962
1553603_s_at	209.99	229.54	190.905	231.419	188.342	265.743	211.95	183.971	193.561	206.227	202.571	184.791	169.835	195.611	236.935	223.805	233.631	178.334	164.868	131.352	157.12	208.602	188.101
1553604_at	1.47833	11.9997	8.432	24.7868	0.959129	18.9896	2.71847	14.2975	4.13196	8.88606	2.53812	10.1627	11.7518	16.5931	13.0006	17.7118	10.806	18.4894	1.26253	1.44643	1.54988	1.88468	3.3138
1553605_a_at	6.67998	9.85877	13.2249	11.7298	10.5465	12.9799	11.7946	11.5613	15.4104	1.93159	2.43827	21.7116	9.76955	16.101	13.1055	15.5566	14.3826	13.8063	14.9705	3.10767	11.9424	12.6514	1.89431
1553607_at	12.9293	19.5853	17.8049	11.1298	4.43204	14.9221	10.6874	3.0953	9.99151	8.6564	6.80168	11.9988	3.46278	8.05559	7.63271	9.79487	11.6205	15.4349	14.8868	10.4066	8.15732	18.6388	1.39899
1553608_a_at	12.8785	5.16921	4.17176	10.9177	2.91671	51.0237	45.36	8.17233	14.4213	35.1229	19.7057	17.8408	9.0412	29.284	26.6915	2.60763	32.1781	14.9582	8.05196	46.5942	32.6226	20.8315	4.6612
1553611_s_at	95.6398	68.8121	183.237	96.6628	72.7479	43.5303	57.1006	77.6983	76.1443	114.56	27.1579	50.9358	94.2782	109.952	106.652	78.7156	63.5869	145.655	59.4679	89.3767	101.983	77.983	65.4586
1553612_at	235.71	205.794	223.366	168.718	144.586	162.133	193.838	194.798	238.884	173.331	207.579	140.11	261.048	160.456	206.198	157.248	136.499	154.77	168.929	195.774	200.166	153.655	134.773
1553613_s_at	1932.8	1800.36	1693.33	1254.97	1195.31	1152.62	1708.52	1742.5	1596.81	1232.08	1313.48	1174	2034.39	1779.35	2161.91	1210.14	1330.05	1056.21	2452.97	2393.26	2150.04	1498.4	1331.88
1553614_a_at	37.9278	16.9199	19.4944	20.0194	28.0564	53.4017	29.6838	20.3806	30.1528	18.9479	36.2634	7.84209	30.6998	30.9532	6.40081	32.3611	24.9486	48.4391	43.5725	3.25973	44.5235	41.788	12.2241
1553618_at	25.124	10.4062	19.9241	15.9003	37.5619	38.0184	22.3283	24.3607	19.9899	41.7241	24.1433	38.3703	21.5624	11.8293	35.6323	15.9686	30.226	30.9341	22.8728	4.88829	19.7307	17.8811	4.92252
1553619_a_at	35.9704	32.8096	24.0655	5.76243	4.97937	33.973	8.07279	29.188	24.8076	15.3213	6.54481	36.2789	20.7344	5.68129	13.0443	3.16794	40.0755	8.78013	6.19807	2.11072	16.0291	24.9169	5.42834
1553620_at	3.63088	1.49318	3.68538	2.70522	3.30875	2.81994	7.7047	3.19775	5.99123	1.59752	9.53638	4.10997	5.57953	3.32192	3.74995	5.15995	5.47424	1.73748	1.64286	5.02324	2.87172	5.36591	10.3117
1553622_a_at	69.8491	62.9093	57.4906	71.1083	44.6387	62.1929	45.0791	39.5293	40.8388	153.61	112.6	115.994	99.0157	85.4133	83.0775	35.44	61.9408	67.3886	96.7736	96.5242	90.9115	79.6592	78.4325
1553623_at	6.16568	7.37693	8.32292	26.4843	19.35	1.751	17.151	22.3515	7.01468	23.0831	18.1973	15.2482	21.84	24.3982	6.02306	23.7423	3.09523	12.391	3.07941	3.4856	37.9118	2.54973	19.524
1553625_at	25.1764	37.4436	21.2983	0.747733	30.6189	5.96058	11.7199	21.3192	62.2663	8.98048	24.7599	27.2261	5.17812	14.0785	15.5251	6.72966	1.14945	31.5956	20.2598	2.74863	26.3014	19.5606	24.8786
1553626_a_at	46.7401	49.794	55.4569	36.6266	33.9711	58.1668	27.9238	30.5674	43.1172	45.7977	48.0771	30.1129	33.0026	36.9559	31.103	53.7248	56.2234	42.4266	59.866	68.4193	14.1319	44.3278	40.6707
1553627_s_at	16.3267	19.0987	3.04913	24.2566	6.81677	15.1086	6.92163	6.12092	29.2134	6.61165	12.2825	28.3465	28.1128	12.5458	23.5355	22.7865	16.7773	9.74345	17.2828	36.8755	5.25084	20.4101	1.66327
1553629_a_at	6.09362	4.6137	5.61782	4.51231	5.51659	7.90058	2.93695	22.5592	3.44693	4.32608	3.82873	6.54652	21.1647	3.14532	4.36805	4.16868	4.53208	23.6573	2.91306	2.12136	4.16087	3.58411	7.25136
1553630_at	23.44	22.4113	37.607	7.32406	3.46394	12.7301	39.4793	7.2043	24.8699	4.97046	37.4849	37.0612	7.9892	23.9543	19.0887	3.47663	7.5833	22.1079	51.0559	52.2577	5.37693	8.59507	18.5248
1553633_s_at	37.5359	37.9509	46.704	17.4791	16.9093	36.5019	53.5733	46.2317	54.2692	39.6248	56.6823	84.5086	43.7858	42.6967	41.3222	41.6412	41.0586	36.0776	59.4609	36.5804	48.2908	45.7232	30.1628
1553634_a_at	23.0289	46.1796	16.0466	5.1297	29.616	22.6375	7.96089	3.41422	14.3967	10.0651	46.5174	35.3742	7.44894	27.9149	7.16588	15.9935	4.60621	28.8755	32.071	4.83644	21.1095	29.449	19.6187
1553635_s_at	4.34972	14.0612	5.23147	1.96932	4.71081	3.01174	16.3164	25.7404	10.5182	5.04374	1.68211	5.4908	28.2435	23.3512	8.55893	11.3323	6.7542	4.75954	23.019	19.9113	5.06596	4.56079	4.98201
1553636_at	2.80176	1.86685	1.48369	3.22068	1.36859	3.21505	2.78137	1.70137	2.64906	1.27544	1.69565	9.30598	1.72086	4.69256	2.27045	16.4314	11.2569	3.60849	1.63671	3.24534	2.37073	1.42739	2.40792
1553637_s_at	26.1857	47.8058	56.8733	16.3344	12.9412	23.9733	30.982	46.2551	31.1111	40.4385	33.0201	30.4416	35.9141	39.243	34.5941	26.3694	17.959	38.7033	44.1221	40.5587	36.5125	32.4924	30.5345
1553639_a_at	288.744	277.596	303.844	253.559	199.109	232.608	217.358	253.594	213.64	168.989	134.08	143.858	334.364	247.323	216.542	211.308	241.801	232.597	281.856	201.939	230.411	166.463	194.958
1553640_at	5.61551	10.4353	7.26833	11.1315	48.5431	36.3746	17.9038	30.7282	9.26376	7.83236	6.67916	7.493	41.2555	6.23002	3.94007	33.2264	14.3473	49.7574	6.29851	31.2988	10.3259	7.81949	11.1329
1553641_a_at	22.3703	6.28779	3.08006	2.99596	6.28597	9.89718	5.38116	19.9234	34.1333	8.42197	15.6096	11.0689	9.19228	7.15641	1.52934	33.8761	8.25555	1.66501	1.68193	21.0777	22.0789	5.28404	3.75627
1553642_at	94.521	104.427	14.3541	11.8554	17.835	89.5648	60.1976	8.38617	33.0748	34.6599	90.8145	14.9606	41.1696	11.4332	80.789	11.1389	11.2056	81.6113	27.7628	9.93766	60.552	11.8544	11.6066
1553644_at	7.3207	45.7148	66.0209	17.3882	41.7095	19.5345	97.8388	63.6897	79.0051	65.019	65.1015	75.9194	41.782	55.2635	86.7172	34.0584	57.0692	88.4849	98.7734	69.5168	72.2587	37.5671	48.244
1553645_at	3.93689	22	13.381	1.93531	1.5622	28.1551	9.76597	1.08669	19.7065	8.36545	20.3134	3.08568	8.51011	1.33169	2.79447	0.867458	8.19723	4.54568	15.5826	1.18382	11.8666	18.1919	1.51005
1553646_at	180.11	192.505	182.03	110.78	191.157	148.462	265.236	205.962	227.643	140.035	114.04	136.269	173.674	198.707	186.794	177.386	173.582	156.125	260.387	240.559	268.497	179.834	149.726
1553647_at	98.6931	121.428	66.5769	68.3674	103.619	85.5739	74.1877	77.6104	118.764	94.1003	65.6498	140.546	82.1668	96.2253	115.418	98.0846	68.8138	89.9789	101.169	108.481	104.969	94.5801	82.2185
1553651_at	34.0052	49.3098	77.6624	36.7342	26.2196	67.7475	30.7699	11.7049	17.6966	18.3615	32.4646	47.1355	33.958	38.4567	36.0006	72.399	37.6751	6.7245	25.6466	23.8931	29.7087	18.3364	31.3574
1553652_a_at	35.6799	27.494	29.7393	40.9935	26.3357	32.047	33.4959	43.5058	33.5257	22.6967	38.3532	47.2208	37.5359	47.678	25.7388	34.406	35.5644	26.5932	37.9554	15.1835	21.7933	30.4797	29.4374
1553654_at	23.244	16.7215	10.285	21.0157	6.33662	19.2063	39.6378	19.633	17.1061	10.33	7.35553	26.7749	22.4932	30.0943	30.0236	27.014	60.0841	26.9703	2.64538	23.8298	27.2608	156.327	132.038
1553655_at	4.98907	5.4493	14.5799	3.28212	2.89634	3.89162	18.4298	28.4528	13.9053	6.16746	3.32806	16.4682	9.22132	2.73098	13.1495	14.6116	4.03521	20.7418	4.08431	4.36226	4.63573	7.1464	17.4234
1553656_at	21.4354	11.3394	11.6969	25.0419	6.76596	9.60623	9.39741	19.2949	23.5084	17.7711	31.3048	26.4326	82.464	26.614	15.5983	12.6868	30.6628	43.9493	15.1999	30.4745	15.9576	11.1012	11.4415
1553657_at	26.6729	31.2112	30.0634	22.0647	10.8881	21.1261	21.9914	4.04697	8.95756	12.3895	10.8395	13.2438	18.101	12.2631	13.8934	7.5984	41.6782	35.8573	11.0742	53.4639	7.80878	8.17011	8.70763
1553658_at	46.8027	58.1468	31.8952	57.4091	43.8175	38.038	41.887	47.7287	35.4935	95.35	65.3021	53.0138	36.4313	53.215	43.3695	64.126	59.0398	54.458	46.4972	47.9356	79.578	39.2608	55.1954
1553660_at	30.433	56.3567	35.8236	48.8737	32.0129	34.6377	56.455	64.5952	35.7259	62.6533	38.2256	70.6394	61.9714	38.9344	19.7993	24.3915	52.6861	10.5967	106.997	52.7584	18.9524	59.0527	49.6458
1553661_a_at	43.4981	45.1599	73.4638	34.7819	15.0193	41.0854	47.917	42.2508	65.2863	38.6419	39.0942	66.5029	40.0881	58.7409	64.3109	28.4004	58.1851	11.1887	35.7571	68.8457	50.8776	42.1859	46.2208
1553663_a_at	8.60151	15.2478	6.44005	5.19985	10.3906	12.9755	7.56266	20.0387	14.6562	16.0975	8.26709	11.0429	13.5563	14.8088	8.06064	11.0487	11.951	10.8938	7.95898	8.77719	9.4543	11.0757	8.76593
1553666_at	42.4884	34.2277	36.3643	40.9481	55.4435	45.4487	42.7029	43.1973	31.0491	17.3706	18.0228	43.4267	40.2139	27.2232	23.7756	23.1041	61.4053	44.1637	30.0355	35.7295	28.3677	23.178	36.3205
1553668_at	138.198	168.437	178.182	117.183	189.491	181.034	163.334	180.101	202.243	178.263	149.006	190.819	174.987	172.364	168.148	173.226	158.825	171.012	171.471	136.345	151.743	184.87	195.358
1553670_at	137.916	133.862	160.475	151.159	138.024	166.87	116.36	132.645	113.014	172.275	99.5915	159.233	127.033	144.392	105.949	81.0741	106.158	118.362	114.337	80.9199	90.4666	139.76	127.868
1553672_at	913.072	1036.63	712.35	461.425	465.852	479.992	873.098	780.489	901.527	474.35	457.645	607.606	974.908	905.797	958.971	648.584	573.806	516.133	872.437	898.719	1026.58	576.905	517.208
1553673_at	60.1184	64.3321	31.1909	36.576	56.8106	49.4541	34.577	50.1033	38.3049	65.2369	33.3962	50.1515	50.3361	47.051	44.5162	41.2952	37.2501	44.5733	32.6526	46.5173	38.8774	48.5269	36.835
1553674_at	38.06	35.5176	26.3084	37.1746	44.2296	37.4271	24.523	32.1113	23.2352	65.8411	25.9385	38.5744	30.7135	27.3978	20.9871	24.51	31.6161	48.4217	18.3331	44.3066	31.7668	15.8538	23.3639
1553675_at	40.3384	41.2849	39.4739	19.739	17.6592	54.8514	30.2472	35.767	19.7195	36.7337	36.3551	56.4172	47.3986	47.635	38.8994	4.49173	39.5081	51.3552	3.14971	5.43735	9.22572	41.4622	40.1624
1553677_a_at	1413.72	1350.9	1602.14	1801.63	1842.7	1614.5	1584.67	1560.86	1051.72	2043.91	1768.89	2172.88	2013.16	2052.08	1409.64	1794.05	2331.46	2071.19	1605.44	1511.24	1948.2	1907.78	2059.81
1553678_a_at	10522.1	11882.2	11035	9910.73	9464.48	8326.54	11347.8	10922.2	9945.75	11446.5	10875.9	10400.2	12760.6	12440	10654.1	9605.82	10713.2	9918.19	11566.2	10008	13100.2	13057.4	13733.3
1553679_s_at	165.71	131.443	157.148	163.194	126.619	141.415	167.336	198.743	141.817	114.946	96.2882	114.888	181.36	193.057	188.957	160.017	139.517	158.131	161.281	138.361	192.575	158.78	135.547
1553681_a_at	87.1856	129.022	90.7408	86.3664	74.728	104.207	80.6721	83.1242	93.2639	126.933	65.1286	131.695	101.673	116.653	80.9931	89.3423	136.212	137.176	75.3042	85.0322	95.9504	70.0293	101.858
1553682_at	38.8983	21.0112	38.7804	19.2478	58.4877	20.0055	10.2441	13.8018	28.0496	41.4656	51.5689	73.7546	24.094	27.3249	18.5199	38.5831	43.9086	77.6659	1.5718	26.7418	9.38564	80.1529	35.6079
1553683_s_at	38.3679	40.2838	41.1218	21.0914	72.811	72.8532	3.94862	33.7373	10.1476	48.0296	28.7618	56.2234	23.4643	27.0544	20.8418	39.3286	54.2457	71.1492	33.7523	26.102	33.8262	40.9128	38.8411
1553684_at	149.186	123.535	115.647	75.8605	66.0966	62.1391	76.6039	100.526	70.7454	60.2706	78.4907	77.6529	95.9691	117.532	83.8884	91.5486	53.9982	103.022	82.6697	87.9991	83.7	88.3894	73.3039
1553685_s_at	213.619	198.929	210.841	266.399	205.973	241.045	166.958	177.295	176.217	265.152	248.99	239.318	199.67	180.511	152.449	269.073	237.079	266.131	220.808	112.488	172.672	204.883	243.019
1553686_at	61.3668	40.7167	54.9862	83.1924	81.2922	44.2129	48.9059	63.2632	36.8139	60.2533	46.4044	40.0145	68.0593	52.0539	46.0424	55.7135	42.4779	64.3585	82.431	84.0151	71.6796	40.5714	50.4016
1553688_at	118.362	142.215	108.082	109.153	44.5556	84.8127	107.259	50.6026	77.9871	89.0836	84.1825	86.4294	86.5661	107.495	113.41	116.483	84.564	91.3178	81.7179	104.327	88.4225	70.2375	59.7642
1553689_s_at	575.111	589.5	487.228	466.811	467.879	468.658	563.527	647.281	451.468	440.263	388.922	359.809	619.177	528.946	525.861	458.142	466.742	472.403	514.807	469.963	488.845	467.49	373.52
1553690_at	206.323	254.28	248.03	224.199	203.026	178.465	210.834	176.307	196.456	204.128	236.737	215.5	156.493	203.356	201.765	266.229	178.986	178.416	183.943	201.432	200.272	193.823	205.684
1553691_at	115.608	113.105	78.5384	106.235	101.477	89.3285	116.387	91.4143	101.577	117.053	67.2683	69.4192	105.574	116.075	95.6115	84.3071	87.8101	77.7093	95.8126	62.1554	84.4304	75.6924	81.8303
1553693_s_at	323.784	297.986	339.732	318.558	376.867	389.269	232.239	235.299	293.979	336.231	394.788	437.67	236.848	235.97	254.484	373.713	343.869	382.525	141.421	167.259	231.877	328.902	271.94
1553694_a_at	292.343	243.97	235.542	223.606	246.69	204.238	290.394	309.819	259.75	205.218	232.895	190.816	221.012	299.997	222.948	211.361	233.088	190.057	269.639	217.52	236.351	245.838	206.198
1553695_a_at	85.6392	121.006	25.1159	153.417	101.786	179.261	62.2944	107.892	81.6952	158.41	91.4146	126.431	91.9486	152.322	89.6868	147.492	112.446	169.693	62.836	110.11	76.6081	180.529	142.981
1553696_s_at	154.164	168.36	193.188	207.297	165.842	177.824	220.072	151.112	192.726	196.713	247.107	183.689	222.493	207.432	167.031	211.851	178.158	176.262	177.321	162.125	179.641	198.084	221.961
1553697_at	71.8655	71.8873	79.7025	84.0987	73.2471	71.1448	45.4461	70.7647	48.2157	82.0945	84.6595	58.0431	74.2727	62.5704	72.8208	76.2705	82.4483	79.4414	80.4618	68.7776	80.1452	91.3772	92.0338
1553698_a_at	122.371	133.757	103.769	113.132	128.232	153.57	108.57	123.097	100.8	80.907	113.452	82.7002	116.633	119.941	85.9329	116.582	133.995	118.345	87.798	114.936	110.182	128.297	115.643
1553701_a_at	57.8361	39.9744	90.8253	26.8663	36.6532	79.5172	55.885	58.7351	37.5544	20.5545	28.1119	12.0882	15.2068	33.6556	104.657	39.1183	73.4812	27.2755	87.7822	120.375	38.0609	55.9562	30.4233
1553702_at	55.1752	80.7752	62.2858	73.5954	29.1228	31.0708	69.0792	33.0575	49.5388	32.2235	72.132	42.4695	54.3517	46.1667	33.2872	51.3827	51.2957	45.7639	65.9292	53.817	102.776	57.2033	48.974
1553703_at	1371.12	1339.77	1198.9	1461.22	1329.09	1381.31	1453.25	1556.04	1259.14	1249.59	1238.06	1246.51	1414.41	1365.47	1532.3	1440.77	1315.43	1177.35	1616.93	1603.83	1448.17	1377.37	1207.41
1553704_x_at	1043.58	869.992	871.341	984.293	904.529	879.004	1026.64	910.477	826.434	796.251	796.969	748.007	1022.6	934.789	1288.91	1151.22	1197.05	823.166	1156.69	1244.81	967.045	926.232	892.085
1553705_a_at	9.11119	11.7445	5.60579	66.5261	9.5546	9.70993	32.5936	10.3402	10.17	17.802	12.911	10.0943	40.6558	16.7355	9.07444	38.3812	33.0284	27.5158	8.66626	11.7993	6.90753	14.6629	56.1083
1553706_at	65.2697	54.6758	37.8912	34.6996	40.7952	43.1384	34.3625	28.9716	24.5114	5.72308	3.16203	1.65167	35.9413	25.3934	21.4584	71.1405	68.7449	55.492	29.7554	38.9003	19.71	54.6052	48.7661
1553708_at	51.8018	53.2859	62.0478	81.3947	78.7036	85.4427	43.5026	43.1183	26.4307	36.6172	43.5009	33.1733	51.4452	67.9104	93.8767	62.8798	82.4365	78.6572	49.7211	30.6947	73.2962	61.2593	68.6622
1553709_a_at	1618.94	1589.15	1765.52	1700.23	1678.34	1734.19	1688.79	1672.03	1660.82	1651.92	1694.99	1571.58	1878.68	1761.21	1728	1654.82	1773.61	1619.94	1727.99	1986.63	1885.49	1502.56	1602.37
1553710_at	70.3296	37.3687	60.3648	57.0406	71.7678	85.6853	25.3688	36.8263	46.8759	38.3402	29.8524	50.2749	73.9401	61.1878	70.2171	79.6956	85.8669	79.8229	77.4673	101.48	73.8989	84.9247	79.5898
1553711_a_at	89.2336	101.793	108.815	104.156	57.3833	136.172	81.5308	75.3297	63.3256	88.6759	93.2628	66.5823	84.0735	111.306	126.371	107.231	123.628	103.36	110.88	109.402	133.372	144.016	76.7812
1553713_a_at	59.3184	91.0495	80.6778	95.4995	78.7217	69.1031	84.7487	62.961	75.4834	73.1776	103.711	123.056	89.1398	54.4405	51.526	115.361	118.462	81.4474	59.104	54.5194	61.0503	114.604	132.878
1553715_s_at	1359.38	1354.23	1551.99	1758.59	1646.4	1485.88	1331.21	1342.78	1287.32	1017.13	882.121	1075.84	1482.79	1485.22	1528.41	1504.13	1665.49	1682.08	1281.3	1307.67	1442.62	1215.53	1377.66
1553717_at	43.4898	25.5578	36.9978	33.3188	19.7452	30.9737	46.4067	6.24455	10.5072	10.1241	17.3596	13.431	26.293	12.9177	18.4612	3.7441	10.7196	34.1693	26.3245	7.65859	17.5498	10.1246	25.1175
1553718_at	272.405	266.25	239.595	226.169	218.018	233.726	285.549	236.244	237.459	205.224	203.115	214.713	238.5	261.292	279.952	159.082	158.165	243.853	303.028	298.087	311.566	204.314	241.874
1553719_s_at	185.23	216.964	187.025	162.152	149.644	176.29	273.968	233.436	232.234	171.88	168.985	154.597	216.203	228.317	241.456	178.544	141.259	146.968	225.383	225.854	235.717	129.778	161.075
1553720_a_at	68.7699	129.176	84.2237	121.614	123.577	98.9597	102.676	65.2473	61.7545	122.078	62.7969	79.1142	53.7299	80.1686	36.7172	82.514	96.2668	172.701	59.1603	58.0459	75.9642	133.237	112.765
1553721_at	37.341	20.0548	36.5799	15.7495	18.9339	22.9642	28.4125	18.5377	27.5543	30.7481	24.3909	33.3994	32.9275	26.7365	38.8624	30.3847	31.4185	1.40967	35.5357	34.7743	27.9718	20.4338	38.8621
1553722_s_at	36.3054	28.7313	36.0357	16.2477	24.3359	41.4164	34.8154	14.6312	43.0588	15.72	18.9994	19.2928	16.4611	27.3542	29.7247	26.9467	42.0974	23.1391	3.22014	46.1786	32.6359	36.2159	34.5371
1553723_at	4.28681	11.1101	34.018	2.36212	7.41232	19.7142	8.08133	8.39739	17.7606	4.75045	21.7524	11.04	33.5392	33.403	29.2597	2.86779	31.3779	6.36866	9.29871	10.0437	8.29725	7.57506	21.5192
1553725_s_at	265.772	305.018	226.172	229.738	144.809	197.613	258.408	233.049	283.172	149.592	207.543	142.949	309.496	222.348	261.145	178.144	127.298	172.886	310.228	263.071	277.59	193.611	161.248
1553726_s_at	89.9309	92.7248	58.5529	74.1563	82.0032	79.5428	63.3848	60.2504	77.6615	74.4902	79.6333	70.0711	67.7554	72.488	65.0014	58.29	48.3453	90.7914	71.0522	54.8854	59.3697	56.7111	49.7752
1553727_at	7.72463	12.519	14.8978	35.6415	7.52619	7.19614	42.292	13.3547	53.1345	3.71485	44.6964	33.7766	3.96482	13.0845	42.698	29.4015	26.8681	18.8066	17.1335	10.9201	4.72172	43.5946	70.1987
1553728_at	42.656	126.743	62.0859	60.3049	153.291	55.3973	50.2621	54.7328	49.605	53.4005	53.1187	134.621	57.3995	54.1443	63.288	68.3649	66.6006	99.2789	42.5371	39.7857	65.082	51.6421	69.6324
1553729_s_at	28.0464	4.57646	25.0818	3.57592	18.8554	13.2602	3.09377	26.6516	25.3856	30.976	2.97898	17.5646	6.32111	4.23277	5.14541	20.8004	21.6474	5.35003	8.62403	5.98142	3.55774	21.9288	44.5714
1553730_x_at	48.4028	124.493	75.4607	127.488	129.76	88.8075	136.829	13.5933	51.0022	166.302	178.629	160.5	26.4142	21.7949	132.354	52.564	40.5303	68.1662	112.724	39.8291	52.5817	123.279	137.816
1553732_s_at	120.812	141.427	164.717	187.64	94.2948	164.638	157.332	125.345	95.7006	206.282	171.205	171.576	162.223	192.132	178.244	96.6104	221.255	174.453	176.514	160.663	204.517	171.04	237.154
1553734_at	9.75935	33.7112	19.6525	30.3019	25.9238	35.6134	33.0833	37.0309	34.9701	44.5071	37.5379	32.4037	37.0712	33.6927	5.06143	24.3932	29.2576	34.946	4.24044	18.8536	17.3607	25.9585	4.44337
1553736_at	38.2053	46.5755	29.988	25.0512	15.4592	13.8941	51.9598	41.7455	55.8938	25.0476	26.737	37.5081	37.1052	35.6203	54.5481	26.0755	15.9761	25.3868	32.6423	43.0915	64.1863	29.4968	30.2003
1553739_at	27.4586	19.2532	3.34678	40.0057	3.3259	19.0606	15.6149	1.91466	7.41001	19.559	5.54079	27.9169	13.3054	33.0212	5.91454	1.59458	12.5734	16.481	15.2881	10.0021	4.37376	2.48873	21.1467
1553740_a_at	17.6665	52.0394	56.8572	43.1728	37.4834	6.12195	53.312	62.258	65.1533	18.7568	43.4271	34.5237	28.37	20.9613	31.7212	37.4393	58.2596	26.2241	57.8654	62.866	72.0025	40.8206	34.8109
1553741_at	0.83517	21.3779	4.93661	1.73918	2.64389	3.03191	1.98356	1.22533	2.53008	22.6734	4.18329	2.66685	5.31919	5.22407	2.07839	8.56034	6.32579	3.81181	18.2557	3.96283	4.66753	3.67577	2.67742
1553743_at	320.062	422.323	398.018	636.176	525.588	692.399	263.441	256.899	305.931	232.905	368.456	362.048	301.347	303.596	316.798	501.171	559.925	550.932	244.152	214.416	168.428	422.032	413.9
1553746_a_at	2.84004	7.10405	6.15006	3.19987	4.397	4.3894	6.71792	3.84937	7.31822	7.09538	29.9807	14.6049	1.09818	3.28726	3.0658	3.15627	3.67116	5.05546	3.136	1.58854	1.99748	6.73117	4.59405
1553747_at	5.81582	4.93001	3.69081	15.6327	5.74541	3.16972	3.92755	3.33199	3.15761	8.9939	4.09096	12.4517	17.0738	13.4996	4.54781	7.4127	4.63172	6.52665	6.27145	23.2427	2.38243	21.1454	9.5725
1553749_at	202.114	220.791	334.534	214.079	330.028	289.873	239.312	199.015	287.163	304.281	236.159	351.909	170.18	238.205	304.911	243.03	268.553	277.733	186.618	354.3	260.359	276.424	356.397
1553750_a_at	71.9621	93.4547	86.0764	91.5091	81.0013	88.13	98.9572	79.3486	55.1263	65.9448	67.7773	83.0962	80.429	73.3424	58.8246	82.6793	106.377	74.6284	71.9525	124.438	91.0545	95.9487	99.4285
1553752_at	9.91696	6.13907	3.96618	3.91501	4.00996	1.77181	15.8213	2.62723	4.03553	2.62815	4.95835	3.7383	5.65205	26.2594	8.03434	5.20845	18.8052	4.23215	20.873	3.09286	3.37061	12.8113	41.0247
1553755_at	5.30971	12.1769	8.08662	8.31184	10.4211	12.1376	8.095	5.81938	5.53903	6.07006	6.49779	11.9407	7.18424	40.4468	5.81088	4.57486	8.37419	21.0395	4.34103	5.92567	5.85556	16.0262	102.687
1553756_at	48.0209	42.2188	40.3245	4.57224	40.0045	22.9293	26.0058	26.4686	34.0603	54.8025	22.6193	50.1477	12.9975	11.7214	39.2827	57.1003	44.1321	39.7276	21.1597	47.8143	8.07486	23.5096	20.3063
1553757_at	35.0387	6.22134	23.8774	32.54	35.044	30.2211	26.9318	6.4954	33.9553	28.2271	38.9024	32.9367	26.3411	26.1343	41.2422	3.16021	12.0608	4.31082	22.274	3.72129	13.6083	3.31808	1.26619
1553759_at	40.9119	69.6624	58.2357	71.6719	51.0555	62.6121	86.0441	52.3814	87.095	66.1029	41.6127	40.5497	37.0257	51.6644	54.3969	90.2013	56.3745	53.5367	89.7696	89.2821	45.3484	88.0966	62.7212
1553761_at	12.6768	25.6311	16.6354	7.01571	11.634	7.90532	7.24258	29.9631	12.495	8.87118	24.0867	2.97207	8.51877	6.13977	8.08916	4.01051	19.9617	19.0425	8.98588	10.5536	4.37871	5.01112	6.90739
1553764_a_at	2864.46	3159.68	3054.01	1858.89	1738.79	1729.15	2385.79	2173.12	2303.82	932.048	938.187	925.874	3420.84	3579.44	3482.12	2204.69	2113.94	2215.15	3333.1	3178.62	3696.8	1976.22	1999.95
1553765_a_at	8.17728	1.51332	5.84957	8.15824	0.785132	1.17955	0.209198	0.515685	0.845613	0.581135	0.481784	0.439925	1.11307	0.732431	1.95085	0.263313	7.7571	1.40554	13.9045	4.80484	0.77554	1.16083	1.3181
1553768_a_at	1337.62	746.893	1222.57	1004.54	854.736	909.057	1157.79	1107.46	1102.69	1047.79	935.504	1020.52	1522.21	1459.46	855.536	790.018	723.44	505.285	1318.65	1280.32	1446.98	1278.77	1245.24
1553769_at	5.8578	2.30133	16.0341	2.81989	4.83272	17.0016	12.3441	3.53376	2.28427	10.9445	1.76167	2.58217	3.37789	4.94116	2.01425	4.11671	6.54179	4.16687	2.12708	12.5056	3.31156	20.4067	28.2482
1553770_a_at	11.1547	13.8559	39.4078	8.94299	13.8872	6.24674	59.5263	45.5687	46.5026	74.6559	49.6166	30.3183	5.88515	34.3801	47.3464	11.7717	50.8042	70.0024	6.62284	28.9578	40.8743	63.2059	80.0183
1553772_at	139.947	134.666	109.878	119.859	97.9577	115.184	126.453	84.6207	149.465	89.4133	107.4	112.429	118.567	116.973	145.494	98.0641	117.432	129.651	115.774	79.0427	108.638	105.989	53.1285
1553775_at	28.7001	54.2947	42.6262	37.2653	42.7204	42.4367	8.49667	47.6264	51.9453	65.2641	40.9488	63.8672	52.6246	101.255	80.7872	59.9087	44.6536	73.3984	103.178	64.0079	72.1278	54.43	50.0946
1553776_at	1.1256	8.89599	15.6709	10.5393	20.0985	1.87566	9.06323	29.7739	13.2439	2.3947	0.591664	25.387	2.42784	10.9042	1.80883	2.05939	28.3806	0.782599	11.2742	1.96537	1.82162	25.8945	7.3361
1553778_at	54.8312	43.6818	49.2165	10.9581	78.9584	25.0207	9.35425	7.62485	8.08485	51.66	15.8539	31.9675	9.74049	45.6713	11.7992	10.7409	21.7287	93.1674	72.3092	7.52923	22.9108	44.9709	62.5026
1553780_at	104.625	66.6924	87.2542	82.181	165.799	108.135	68.8665	58.7289	97.0195	91.8083	93.229	94.7536	104.425	101.233	121.071	81.0748	93.4226	150.886	97.8335	94.5394	108.854	112.32	107.972
1553781_at	56.0081	34.9626	45.9152	29.8891	49.9619	81.105	47.6412	37.567	67.6911	65.0155	66.4112	51.179	57.7658	47.4668	78.0247	48.9141	53.4401	46.2454	61.6511	41.1754	61.6244	44.8809	42.6772
1553785_at	5.60094	9.45959	26.6047	29.1095	38.3019	44.5365	5.6764	10.2478	51.5341	35.0789	29.4174	38.6227	62.888	7.18126	5.78353	22.5511	17.3656	7.9348	7.78823	40.878	14.817	18.9855	2.03471
1553787_at	96.9583	67.1038	87.7114	101.902	110.923	173.34	57.2021	87.6212	95.5598	80.2056	84.316	81.6419	102.663	81.1591	96.1605	129.19	146.765	116.813	126.057	85.5208	90.2632	113.1	134.741
1553789_a_at	36.6527	59.0476	68.6685	59.7738	92.1029	73.9745	5.21362	38.3028	26.6415	69.3156	81.3562	115.783	42.4182	38.6803	3.66701	102.297	56.474	110.7	27.5196	35.4869	52.796	63.8932	73.3165
1553792_at	19.1033	25.452	60.4047	24.9518	22.9787	24.8932	41.2842	53.7787	47.7556	23.8225	17.2737	20.9821	23.0512	50.2556	54.4452	21.6754	43.8358	39.9052	39.3975	51.8157	34.575	35.6879	19.7835
1553793_a_at	45.9841	12.2209	53.0045	38.9065	29.0309	44.9321	40.8143	37.1328	42.5257	18.7888	38.7672	47.8916	30.0406	47.1965	36.4713	38.5802	28.0927	8.22677	28.3125	6.29091	32.4491	41.6982	21.1059
1553794_at	93.7256	86.8767	45.2471	98.7885	57.6159	62.5046	79.8568	65.0771	108.02	45.7659	65.1283	74.2345	68.8417	65.2553	79.9858	60.2936	70.3961	66.9547	82.7529	36.5254	43.5252	78.2454	64.0339
1553796_at	46.5665	78.9385	78.5985	52.2315	42.7379	62.3298	36.3294	33.3578	62.146	63.0409	74.3107	63.9947	53.0652	50.4387	54.2695	78.6967	62.5852	62.8623	74.7797	42.597	50.9434	64.1646	81.5887
1553797_a_at	39.2215	27.2217	21.6129	26.3831	26.6036	38.9126	22.5699	24.2553	25.8882	32.5362	23.5469	37.7233	36.0159	42.3248	21.2332	42.9619	31.2569	45.1489	28.6991	5.55245	8.33897	29.2992	33.0344
1553798_a_at	17.8762	32.1161	31.8216	22.4378	21.0843	36.8848	29.6742	46.257	35.7046	21.9125	13.2323	36.3519	36.4738	32.9448	25.7149	35.5465	25.1209	7.35343	33.4771	3.1855	37.6974	37.1031	21.2889
1553799_at	10.9373	5.85195	4.90444	20.6414	7.30757	4.38571	34.8875	4.35656	6.93746	7.50194	19.5336	17.5788	24.6427	4.02739	5.11929	2.13617	13.7011	25.2219	2.65102	11.1189	15.4934	19.8458	15.8209
1553801_a_at	730.544	783.984	881.743	579.752	552.402	852.112	702.868	440.129	865.308	536.113	633.996	589.851	756.624	701.487	702.427	632.205	538.963	726.987	697.09	624.805	692.123	504.147	408.176
1553802_a_at	3.63156	4.26738	4.39031	12.8155	4.56339	4.38111	13.0782	3.15075	2.73292	5.18086	6.24195	5.99108	4.77953	6.97355	6.57188	4.19089	13.5835	6.1576	7.01442	4.11805	7.17888	3.73545	8.88424
1553803_at	15.0805	124.891	55.5025	79.051	83.224	116.917	39.3315	27.3862	12.1918	9.37465	9.87442	70.2755	46.9249	74.4033	10.4365	22.6996	112.008	68.6974	63.618	60.6657	13.039	57.7923	12.6042
1553804_a_at	26.9162	31.5129	18.1077	19.3423	26.0449	10.6393	45.4355	35.4772	15.0805	22.0217	27.3113	36.2419	31.5224	29.237	33.0217	47.0761	24.3141	29.8338	11.8992	5.68845	32.6816	29.2116	2.80943
1553805_at	41.6515	71.995	74.2499	32.7066	52.0104	50.3996	45.9032	32.4863	53.8334	60.9583	56.8234	64.0633	69.6567	53.0319	54.8022	51.8095	34.6903	62.723	55.9215	76.9482	67.1572	38.466	57.4747
1553808_a_at	18.4399	28.3064	1.53367	28.8514	4.41974	10.2378	4.48934	32.756	29.9541	29.6222	2.30391	21.652	14.066	17.3057	28.7642	2.44202	14.0624	15.4701	13.8373	3.55807	17.112	19.4424	13.6969
1553809_a_at	25.4676	24.6164	19.4031	18.8588	19.6629	29.9118	14.2968	29.196	32.0865	4.72619	22.9604	2.68781	11.5047	30.4364	25.3219	11.553	34.4182	38.9127	13.5557	5.90693	36.2197	3.86178	14.5464
1553810_a_at	334.285	403.661	307.987	327.877	381.179	379.982	322.233	386.485	324.813	495.086	408.064	589.874	254.011	402.587	377.188	578.059	498.989	525.393	311.69	337.255	399.31	606.65	346.838
1553811_at	1.98101	18.6532	44.1636	26.469	33.577	15.5458	28.4637	24.4982	19.6411	35.5351	23.1914	30.0141	5.72255	17.1649	41.39	41.9955	18.3734	26.0984	14.3477	16.608	49.3576	27.709	35.5937
1553812_at	10.1051	11.5355	4.36339	6.96446	8.11725	13.0483	13.3806	7.09069	4.16826	5.06905	15.7818	10.039	8.45921	13.0208	2.43683	3.55034	12.3834	6.6261	8.61748	4.05621	9.50557	7.43896	10.3484
1553813_s_at	7.37553	32.0428	4.94217	3.12093	5.05488	34.7538	2.91729	5.58392	4.68591	13.5963	18.4188	22.4923	10.3107	9.15303	20.042	11.9693	9.89121	58.9383	4.3417	24.3172	35.1347	8.49227	19.4706
1553815_a_at	40.8735	55.3767	70.1126	60.7282	49.6454	62.2415	68.2989	50.2657	45.7985	15.6883	52.0033	10.5941	78.3144	71.6633	76.0064	90.1642	63.2718	76.1657	49.3971	65.1487	61.4063	77.147	46.5963
1553817_at	21.4128	2.52482	5.16265	1.726	5.2105	18.0451	23.4401	6.15132	15.2946	15.349	3.91443	16.5188	4.49857	4.11086	5.6446	2.89747	3.62407	8.87528	6.38419	4.04052	4.75269	4.88667	18.2654
1553818_x_at	3.53092	7.64862	4.30907	5.74908	6.48188	5.67005	7.27901	3.75449	3.71081	5.79824	5.09165	4.2367	3.67842	7.9591	1.8383	4.2468	3.71441	2.7068	3.1771	3.90044	4.30375	3.11485	4.67021
1553821_at	57.4807	60.2542	39.7832	39.6674	41.3588	45.8365	41.0786	36.3214	24.5236	46.2598	50.2001	50.7678	41.8044	42.8706	28.7848	46.5273	41.2015	69.1019	34.1991	61.1843	47.6453	40.7509	52.6005
1553822_at	5.3011	12.4534	33.4794	10.0914	13.9524	6.86427	27.2443	7.76192	6.08191	4.39174	5.53191	11.4654	6.09977	8.96471	9.79253	2.08481	4.19797	4.69289	16.3187	20.2266	21.1843	4.86413	4.29114
1553823_a_at	26.306	27.9047	27.4138	15.53	22.0999	28.4583	14.6122	14.1711	5.60102	25.5452	29.5417	15.5177	21.8184	20.7516	24.497	22.4714	27.745	19.672	25.2212	42.3038	6.08143	21.5923	15.9914
1553826_a_at	47.5444	119.066	15.6777	74.5129	50.5294	64.0824	43.3921	21.599	63.6633	36.1008	10.4354	84.7861	12.6063	27.1993	50.323	51.1013	29.2702	79.5755	11.2882	20.7536	95.6315	43.1295	77.8419
1553828_at	33.6427	70.4235	55.8702	48.5503	40.6999	92.0128	63.0254	51.2926	57.7584	83.3028	54.5674	74.1927	69.0815	26.5497	63.0518	41.7676	45.9102	53.5653	44.8452	91.7468	48.5062	46.9894	36.5264
1553829_at	20.9861	14.4185	35.2424	43.6478	26.8118	43.1294	22.2833	50.3197	28.9132	9.24382	3.56524	30.3176	13.8056	10.9451	11.9008	37.2201	17.1414	4.69068	3.65564	1.13659	1.41941	2.98739	3.53344
1553830_s_at	2.34904	1.25501	14.7967	1.14991	13.0236	6.55998	12.7853	4.80445	1.25069	23.5919	3.41729	0.891544	8.05428	8.42557	0.545864	0.835069	5.54632	16.3382	16.046	0.60486	14.352	1.97778	12.0844
1553831_at	71.5503	56.7929	65.4622	36.2945	54.1599	55.0968	33.5292	64.8069	61.3222	46.9485	31.6725	50.9864	83.5	87.7329	69.8341	60.4955	64.5308	73.3329	74.0542	69.6032	84.1022	92.3226	63.4646
1553832_at	65.6115	102.204	69.0556	50.641	59.5467	52.532	39.8657	64.7793	79.838	55.3862	66.2872	82.5979	75.3988	52.1706	66.6509	54.6938	58.7596	84.4593	70.1607	82.1722	69.0959	51.9568	69.6865
1553834_at	18.991	1.34173	20.7368	48.0875	21.1991	3.24446	27.4945	17.8681	28.6234	18.7638	20.6474	18.5192	20.1845	18.331	22.9333	21.6704	11.5005	20.1285	29.2259	29.3393	12.8752	20.1026	20.4961
1553835_a_at	70.5595	42.348	88.4223	63.836	55.2223	52.6333	55.1533	67.6947	54.2237	27.4661	46.4193	62.6357	36.1091	41.004	33.6632	54.5856	71.7769	67.2537	56.0165	70.0109	64.2718	63.3438	50.5559
1553837_at	4.69856	5.75376	6.85829	9.03635	7.33324	11.7872	7.44264	4.01177	3.96406	15.6505	4.9314	6.16027	5.23641	5.98598	3.58848	12.2186	6.04744	7.66723	4.2165	6.02966	6.97923	7.6173	3.30071
1553838_at	4.18049	32.7778	40.9589	3.8865	29.5533	9.77709	21.9198	4.24921	22.2554	3.49318	13.2183	38.4869	20.6686	29.4741	4.70611	28.0141	4.00775	34.9402	29.1678	13.3559	4.174	22.8794	7.06522
1553839_at	103.743	153.71	113.945	87.7597	109.225	58.7048	130.43	56.1215	140.507	116.666	111.442	111.937	130.456	129.533	79.0387	79.4339	106.981	97.3554	105.257	100.329	80.8953	88.8131	148.686
1553840_a_at	134.037	186.017	143.468	119.388	117.599	145.37	133.528	138.948	99.6587	172.038	143.451	151.515	146.379	95.6719	118.098	105.445	155.387	158.115	86.06	92.3556	136.414	150.839	142.103
1553842_at	42.4358	99.3536	47.3203	33.7976	34.1431	103.811	36.4759	38.185	46.6704	65.7191	39.6016	79.4426	52.7747	41.13	17.6256	45.7797	31.5436	55.3437	61.8585	34.7228	32.7422	47.732	44.2704
1553843_at	67.4964	26.5714	139.91	59.0947	24.9452	103.235	65.5489	72.5547	86.0973	52.5486	63.641	29.4126	98.3817	74.7473	97.3013	102.728	65.3272	91.9236	62.5031	97.7624	99.4546	42.4545	92.1131
1553844_a_at	8.54102	14.5662	6.95104	37.4671	27.2637	36.9499	7.35353	40.2542	5.55739	18.4754	28.3633	48.3959	5.82035	5.34784	63.7248	13.4347	8.42277	10.008	12.3863	42.1566	11.1918	7.35107	11.3064
1553845_x_at	19.2121	69.9743	12.9396	55.0305	76.2826	115.176	71.7054	36.2886	3.16553	5.69911	39.4807	80.9548	28.2278	60.3881	70.3398	76.8807	107.505	71.4888	49.1956	79.7646	89.5319	100.309	82.5554
1553846_at	5.11878	3.61931	3.76411	7.32292	5.02182	5.31143	4.63634	11.4135	7.48068	5.96365	4.61186	3.86531	8.60322	4.19931	8.60936	4.60776	3.86355	2.88221	3.12432	9.32174	4.81879	2.54957	2.81378
1553847_a_at	25.5546	37.7328	42.9813	19.0647	32.0389	28.5578	32.2649	16.1821	47.1708	39.4773	30.004	23.0119	29.3316	38.318	28.4964	39.5212	16.7805	6.31134	28.5922	27.0593	31.2096	5.89877	2.37331
1553849_at	22.9296	34.1454	40.445	6.56499	34.7497	26.9804	31.5661	16.4932	28.4734	28.1975	30.7726	17.3243	25.0577	26.2844	31.0921	32.9287	14.5208	38.6757	24.9018	32.4356	15.9462	41.9601	28.122
1553850_at	3.47335	15.988	33.7606	15.0469	15.4131	48.9087	27.3363	47.3063	10.2742	14.392	37.2182	27.7898	45.6872	25.7691	12.1453	11.6801	49.0734	34.3512	32.369	20.5477	36.3515	2.07601	64.3505
1553851_at	15.9596	16.754	16.3479	16.2097	14.2809	14.436	2.76959	10.1759	6.27156	3.58892	4.60371	11.8246	32.5596	16.724	17.8864	4.75661	28.4659	27.4079	23.7448	16.4343	18.8768	18.6388	4.20125
1553852_at	49.5545	52.3837	43.7411	49.7278	42.9292	44.7557	42.5945	50.9246	48.7876	51.183	39.7814	52.2204	41.8443	48.9491	37.7349	46.6312	38.4865	41.5571	66.2575	40.5341	61.8524	61.947	43.6584
1553856_s_at	43.4708	55.7613	67.2959	22.2609	51.9182	46.9426	49.9244	27.1726	43.2856	45.0967	43.4635	35.4772	43.2029	45.3699	39.6108	49.5851	41.7724	52.7159	36.5351	42.8821	44.0264	55.4618	81.1562
1553857_at	51.756	47.3143	38.9178	37.7313	57.2719	60.4076	35.3585	47.2204	47.367	80.8303	56.7111	66.2651	37.6613	47.1831	44.9285	66.7687	69.3692	78.3999	40.6629	47.7507	45.1764	61.0568	76.8357
1553858_at	123.87	129.124	194.711	130.355	130.276	103.79	138.367	149.828	130.25	56.1803	110.145	152.444	130.861	199.409	205.156	179.345	161.871	139.968	141.072	168.934	140.27	164.455	149.259
1553859_at	15.6475	19.6366	28.1244	32.0831	20.8854	35.7652	18.914	15.3193	29.8	20.0214	28.8506	18.384	24.5299	24.0599	32.7841	24.1244	15.5371	51.7807	25.6029	13.1156	20.6116	20.8661	11.5401
1553860_at	5.00529	4.6889	6.93067	5.94404	7.65696	12.8526	5.84473	8.15296	4.06427	7.33649	8.79148	5.92027	7.32887	8.31649	5.84065	7.48033	6.64639	4.25563	8.54316	11.2698	9.07536	6.74401	6.04861
1553861_at	3.87675	21.2722	5.86104	4.35674	25.8144	29.7814	21.7212	5.91913	30.2657	21.0433	27.7422	8.57009	2.47017	2.35919	3.70434	4.41335	14.5023	8.40341	22.7513	1.5513	4.89119	6.65947	24.4642
1553863_at	22.2881	50.1919	25.7645	27.9591	29.5445	40.3838	36.483	34.1985	44.0707	49.2427	7.20097	11.3254	32.7503	48.7983	35.2673	36.9969	64.33	38.8486	38.5847	42.7472	65.5702	32.9352	43.0345
1553864_at	21.4613	27.6063	22.7887	32.8608	25.5367	28.5375	28.1627	13.004	19.3346	48.0086	14.4773	28.0348	5.5507	19.4777	30.6962	28.6313	29.9653	20.1159	23.8041	33.2535	32.0535	36.2893	3.48182
1553865_a_at	6.45984	37.0977	31.6558	47.6134	31.1473	43.7918	21.3122	36.753	33.2977	11.2992	31.1732	8.42086	12.5851	39.1005	43.8081	31.1422	39.0162	47.2628	23.1613	33.8379	34.5136	35.3668	39.0043
1553868_a_at	26.3842	30.8898	14.9333	15.347	15.2325	35.9955	16.8481	33.7664	24.5001	19.087	24.3255	17.165	22.7888	23.3189	18.7751	24.5003	13.0676	20.2054	23.5734	20.9775	22.6272	15.128	8.96118
1553869_at	6.95861	13.0817	22.8879	7.00478	3.87487	4.56906	38.6608	25.2046	10.7659	17.6616	5.12293	8.94016	43.1357	16.5515	2.50233	12.0832	9.77168	19.4754	23.9126	14.8602	13.232	4.30973	14.1369
1553871_at	43.9781	54.2024	56.3981	29.1074	12.4448	35.7996	23.809	49.1078	49.4085	12.2793	57.2378	43.9578	40.8183	58.5346	77.2215	60.5144	52.43	77.6661	37.3269	35.738	34.4031	55.4714	57.6995
1553872_at	22.4362	24.0523	56.8394	50.0453	11.8144	73.7956	19.7889	45.9982	20.7733	75.5054	48.5979	57.489	43.8589	19.4368	27.4706	43.8117	18.1796	22.8438	57.655	42.7956	32.1484	58.6395	46.2512
1553873_at	22.845	12.8941	20.5508	1.56262	22.0074	6.51469	22.8594	16.1726	2.71094	12.1988	3.9705	3.92676	23.6255	17.54	28.8122	10.3146	17.2075	10.3023	26.3192	5.52115	4.88368	6.15195	16.9206
1553874_a_at	2.34754	4.9486	19.5398	7.77117	21.4362	3.50258	8.48838	41.0587	2.78008	4.29714	18.1924	7.46619	10.4965	3.6895	2.48259	5.70407	2.51848	7.59047	20.8764	3.38272	4.06543	8.68899	21.4686
1553875_s_at	13.5818	7.98621	47.9939	23.1226	31.4129	33.5597	11.7432	4.98637	4.76882	4.95432	5.85658	30.5269	5.72807	8.68553	12.6406	12.0124	20.1724	4.57649	19.1617	13.7691	8.0716	4.7495	9.00681
1553876_at	14.3111	41.4399	14.1973	39.423	33.5362	25.3028	36.2456	35.3555	38.3773	34.3066	38.0079	15.7623	18.0407	26.9433	21.5743	16.0451	12.5017	35.3015	26.6171	4.92918	14.9369	15.3167	31.0556
1553878_at	48.3208	29.2353	24.8823	44.3569	37.8053	42.6783	38.8617	31.057	50.6986	47.0614	21.1691	29.5808	6.60876	37.156	29.3716	43.3179	40.883	36.4959	29.4129	56.9288	49.5249	43.7311	28.3766
1553879_a_at	26.3162	41.215	14.8096	45.9505	34.55	62.5311	37.9563	35.19	14.6702	28.4952	20.0747	9.03747	17.9991	18.7237	30.1268	28.5916	36.0343	4.57659	25.3426	16.2924	56.0234	29.1101	27.6967
1553880_at	17.0702	43.578	7.45278	41.2685	26.653	6.77366	35.5778	67.3265	28.5918	7.41487	42.139	7.53374	28.6324	28.0687	22.3177	42.3785	36.9451	32.8056	25.9242	35.9298	28.7223	46.3696	10.2381
1553881_at	117.792	141.016	127.486	151.337	144.852	123.093	134.808	147.09	133.888	87.4258	92.2745	107.674	108.16	139.666	136.33	137.479	113.946	87.7625	131.884	117.884	139.682	108.804	96.072
1553882_at	17.6239	2.93293	13.9187	4.96913	6.06164	2.5314	9.12187	22.2249	11.2249	31.1079	11.1956	1.32309	5.40032	17.135	2.88922	14.2086	1.57298	13.7895	5.06798	17.9179	2.42887	25.7219	5.70054
1553883_at	45.6379	20.7684	17.9117	5.04009	2.20212	29.3194	26.8597	3.19822	2.77842	14.348	13.7157	12.9639	18.2002	27.6538	8.53993	16.097	9.852	27.4375	3.03406	2.66709	26.1659	18.8804	27.1579
1553885_x_at	20.7367	12.856	6.44639	20.3068	1.18847	13.9316	28.6848	19.167	18.2458	11.5843	17.3208	21.0215	9.01351	20.7591	9.77856	5.99441	9.29265	3.23486	14.6526	30.132	9.97048	5.75377	22.5926
1553886_at	4.27171	15.5197	20.301	13.8022	18.6749	2.99817	18.0147	4.40406	4.06368	23.0971	12.5314	22.2623	1.99958	7.74218	19.3161	33.1842	16.4415	4.26832	8.0387	22.7259	17.2154	14.2619	23.4198
1553887_at	3.17437	24.1914	4.89942	3.41686	13.052	6.28766	2.17419	1.74757	2.93264	2.97403	3.22669	8.12513	2.29002	2.32357	13.3825	4.90031	2.53982	23.6646	2.32528	21.2443	6.81165	6.49015	6.07034
1553888_at	4.2249	33.738	4.59408	9.72536	5.04384	65.0756	8.05576	29.9942	7.95766	10.651	10.7051	15.6291	33.7673	27.6976	7.93098	10.6145	15.8009	17.606	6.64326	37.7084	14.7868	17.0995	14.4552
1553889_at	3.36669	10.0239	9.28579	1.93783	7.40872	7.41666	4.896	3.98241	4.34968	15.7826	2.43491	7.91881	6.69505	5.42665	6.46217	4.7292	3.40312	6.49494	4.55887	4.90974	5.45063	8.45634	4.02591
1553890_s_at	35.7856	38.519	16.9441	6.93739	67.0333	12.0622	38.5994	60.0596	17.0969	15.8874	72.3212	80.0162	26.2863	12.0073	57.6176	31.5632	36.3682	64.2996	13.4868	42.9788	21.117	63.2621	31.7651
1553891_at	27.6652	75.2844	56.807	52.6963	17.2902	56.3036	28.0008	39.0002	62.4878	14.7437	11.7868	42.925	46.7836	55.829	57.8116	50.6801	40.6728	54.4118	32.7705	7.30258	52.1436	56.8659	59.2346
1553893_at	57.9594	21.7632	61.6355	47.3972	38.6106	54.3502	67.635	71.3735	55.2544	63.5575	49.6372	36.9912	65.0878	58.5567	62.4515	47.2013	39.5933	93.8851	36.8104	89.242	60.2442	41.9099	59.143
1553894_at	46.2322	43.0753	30.9226	88.2785	38.8284	58.8739	42.2731	2.73683	31.9507	71.3104	97.5608	101.343	37.3787	25.9892	33.4535	92.3522	83.9352	63.7704	37.1667	20.2045	47.8387	85.5489	40.3085
1553895_at	40.3189	53.5032	49.6473	56.1034	58.9139	63.1735	61.1585	46.841	63.9761	72.8518	48.6865	69.0319	33.1942	41.9895	67.9943	38.6736	68.4988	66.5608	45.4385	51.266	65.8752	25.4447	57.4304
1553898_a_at	3.94943	2.03309	2.49744	3.55835	1.97029	2.96216	4.59808	2.52517	4.95905	9.40556	3.48663	3.07963	2.32507	1.88494	1.26497	1.87202	3.4265	2.86146	1.65295	3.01617	4.98272	4.95218	1.74035
1553900_s_at	71.7982	71.7306	66.4548	9.68763	19.7826	49.1795	44.5836	64.6414	27.0112	41.239	34.2642	32.7389	6.72294	44.6658	52.3778	50.8307	24.4196	48.8371	63.979	7.73252	25.4813	13.1338	21.7875
1553901_x_at	86.0755	96.0457	82.7371	116.482	100.913	94.0909	107.859	67.5498	107.29	128.599	108.111	75.424	95.0765	93.2205	115.234	99.7683	117.826	84.0285	77.8869	112.669	109.637	112.107	80.7621
1553905_at	40.3868	35.371	27.0679	20.6882	21.1078	33.5509	48.1756	51.8162	44.2002	24.8087	12.7327	24.2276	23.1459	26.4043	29.2154	27.1895	14.9155	17.8098	27.6655	27.8054	50.026	29.3194	30.8498
1553906_s_at	154.472	199.892	168.597	227.684	199.608	215.2	238.691	274.812	216.564	208.548	192.717	315.115	145.531	204.988	92.4351	228.167	147.27	290.176	185.979	195.341	168.598	33.7407	179.192
1553907_a_at	8.36903	39.006	47.9204	28.9439	47.2731	32.2946	30.3252	48.7074	37.6118	45.6992	33.7916	32.6434	9.51444	9.55806	43.3307	43.0134	50.296	58.8507	41.7811	7.67394	36.7288	44.2353	53.88
1553909_x_at	152.587	184.103	174.001	172.081	116.55	147.351	222.449	213.576	158.668	246.774	182.217	179.327	153.304	157.72	134.923	170.304	136.263	164.287	144.488	159.154	138.066	199.436	142.038
1553910_at	46.57	26.8067	33.6517	49.2474	63.2647	59.252	45.7704	35.0339	58.6034	32.3417	42.5268	42.7683	69.7501	37.4955	48.2027	5.72703	51.0915	81.52	53.0467	38.2634	46.744	35.6443	42.0298
1553911_at	16.5253	27.748	5.86058	13.3157	17.9463	7.01481	2.59565	6.25116	6.1731	7.24403	5.658	33.8223	24.1124	4.28197	6.92426	15.744	13.9759	25.1893	18.8577	31.5805	26.6316	9.35282	9.43232
1553912_at	15.2036	15.5244	9.38019	13.4675	20.913	2.37365	15.0921	3.32469	1.58057	12.0395	15.4245	11.1581	13.7743	6.26856	1.3102	4.39926	6.34802	18.1362	5.03409	5.15234	13.1006	17.1014	19.2708
1553914_at	20.1992	24.6697	21.5165	19.6686	3.65829	5.10737	17.795	18.8321	13.8472	5.7131	4.01457	14.0681	6.3967	21.8094	36.4946	43.3737	14.9181	4.3179	18.0095	11.2415	28.5135	11.8858	41.2257
1553915_at	8.31348	17.2108	15.7184	22.2058	1.4321	7.57028	4.79803	8.68327	2.57363	2.65883	11.4251	0.564138	17.9187	12.1129	3.73788	16.8491	1.97846	16.5986	36.6332	15.1986	1.61039	24.2854	1.03463
1553917_at	42.3314	52.6755	47.2021	27.1069	55.3463	33.5048	44.3092	10.0537	17.9291	70.0493	35.5651	77.0325	28.7203	7.10227	87.3302	55.0383	81.0615	76.9673	73.1501	7.42075	65.421	94.7221	42.4858
1553918_at	42.5002	50.2449	37.9956	39.2868	52.4114	64.5444	58.212	41.3009	77.2178	74.2336	49.1488	41.5472	23.2051	33.1462	51.3738	31.9554	54.5663	72.8845	22.8858	22.1288	73.4078	52.8788	55.3111
1553919_at	44.4022	35.6985	40.032	25.3447	19.1994	23.9107	27.6726	13.8543	26.8491	6.65504	50.8417	16.4568	44.4688	31.2062	32.1068	23.4745	23.8149	7.18076	7.87343	15.382	37.9967	10.27	36.0996
1553920_at	17.6451	41.5156	24.9691	23.4527	20.4946	33.3368	41.8569	14.193	16.9173	40.8205	18.2518	46.0477	16.9562	15.9479	14.7652	24.006	15.2352	24.283	1.93616	14.6105	24.2372	27.2361	3.09671
1553923_at	7.69396	19.809	24.2036	3.36982	55.9073	9.56068	7.75582	26.1046	8.93357	28.5318	32.6546	10.6005	9.07181	6.37555	16.1744	36.4888	33.1147	39.0542	19.1535	3.82158	2.16502	27.2455	28.0884
1553924_at	14.7894	30.2136	19.2082	2.38852	20.9276	21.6499	14.4466	4.31236	3.89092	15.0047	14.5871	22.0367	26.3458	13.099	21.584	10.5457	8.95989	19.066	5.63347	11.5896	12.358	2.85378	10.3625
1553927_at	7.35069	13.9476	48.8626	6.34729	2.08409	7.24251	5.01092	5.51786	10.4361	38.5612	9.96778	54.5558	3.97716	8.39643	31.363	12.0518	43.9438	23.5937	11.9824	13.4784	18.6116	5.09482	41.0595
1553928_at	357.759	392.484	395.503	333.652	407.017	350.034	397.263	391.113	455.005	602.69	528.413	618.128	525.826	480.659	504.606	537.625	481.802	478.671	486.864	571.906	520.41	593.531	568.437
1553929_at	25.4098	54.3989	48.0236	44.9768	51.173	22.2835	33.6519	30.9779	7.02095	52.2385	12.1885	64.2603	47.1551	42.1568	36.585	51.751	35.7215	18.1664	25.8197	54.3836	62.1756	32.5308	73.0454
1553930_at	9.84948	28.7156	42.8491	33.2369	36.3643	41.6798	53.6955	44.4428	33.517	33.6319	29.0052	26.1598	35.2718	35.7518	15.5621	41.4859	19.4828	23.6296	15.6867	22.6835	33.679	24.7862	26.2087
1553931_at	37.6766	29.6958	40.675	20.7019	16.4474	41.1453	41.7103	71.749	10.1134	34.1725	6.72399	19.0222	16.3119	19.755	29.1106	37.63	15.3113	20.5959	31.5714	15.1981	39.2546	34.797	6.19245
1553934_at	28.9325	41.4152	31.6464	22.0743	23.858	15.7503	16.6932	21.128	23.0894	13.4854	33.576	15.2737	43.4984	40.7987	6.00675	13.6147	14.96	28.7811	30.6993	1.93628	21.0763	34.2449	16.6086
1553935_at	12.6267	9.56598	12.7316	11.6925	5.24868	26.5538	27.6027	24.477	6.53492	6.8954	20.7695	19.0527	10.6714	22.469	23.5675	7.03656	23.9909	29.7437	13.3763	13.2233	36.4149	11.1417	15.8062
1553936_a_at	8.19699	8.85689	8.633	1.92569	6.18632	3.97088	6.44869	8.77697	8.48267	9.25396	11.2578	21.3046	7.97561	2.03984	9.65234	12.732	11.7061	8.33937	5.07022	12.1705	6.95751	3.02275	11.3773
1553938_a_at	16.7036	23.1912	3.24209	5.95286	22.4341	10.0926	7.26173	1.35384	23.348	2.03595	21.0707	18.4931	16.8414	24.2341	3.09085	3.69227	25.0861	28.8356	25.3031	18.1662	48.0015	31.1558	7.00908
1553940_a_at	223.543	195.588	250.079	250.697	202.138	242.682	253.063	167.364	186.885	172.315	214.625	189.794	244.973	259.38	254.902	262.339	239.605	255.785	241.997	251.241	225.712	211.106	256.293
1553943_at	72.2327	167.461	104.825	76.4693	103.893	140.682	77.4667	63.9906	72.5919	77.3927	15.6584	90.1619	80.1178	70.1675	68.9769	75.7526	104.358	118.924	53.5825	86.8095	102.116	62.4186	113.592
1553944_at	21.3806	15.3904	27.945	29.9039	19.2675	10.1338	20.3636	0.646994	32.6984	15.5408	46.4867	16.1118	3.978	12.9056	24.7952	20.3437	3.43148	25.0018	15.8398	3.37931	15.4555	10.511	11.6644
1553945_at	40.1541	65.6153	47.1572	6.37499	4.77403	59.4083	24.1073	52.8282	28.9236	53.5697	30.1201	18.815	65.8883	34.4703	29.1103	37.5425	39.0552	8.6052	15.3641	70.3602	47.3349	33.463	48.9529
1553946_at	2.45202	10.2104	6.42718	6.49113	9.21646	6.97142	8.61401	4.8621	4.52782	9.90614	45.0975	6.60353	17.4676	8.33094	4.16618	4.74547	10.829	9.19959	2.56968	11.4354	6.12544	2.248	4.94432
1553947_at	286.066	261.434	289.54	242.014	228.154	230.312	279.049	305.837	216.77	179.169	217.637	224.914	310.338	195.907	260.955	291.541	267.617	263.086	291.532	288.895	284.616	299.556	255.499
1553949_at	12.6295	7.25884	6.23139	33.6705	10.3562	35.5574	10.3087	4.81723	17.7412	10.1256	9.74628	10.0774	8.37243	8.06986	5.97962	34.4983	17.7501	33.0607	10.9467	19.2088	8.52348	6.63364	10.4014
1553952_at	65.7176	110.594	83.0945	53.6025	92.7966	56.7495	53.0034	19.4558	20.0681	76.6026	10.2299	48.7464	19.3209	26.6075	66.1895	44.8842	48.4007	121.608	16.6691	40.2825	22.9682	62.5018	100.545
1553954_at	2482.67	2166.67	2452.78	3137.54	2909.51	2793.79	2620.98	2535.92	2549.48	1827.35	1888.7	1845.65	3078.58	2924.17	2747.74	3128.55	3383	3191.57	2665.59	3078.78	2482.13	2923.73	2764.04
1553955_at	894.642	850.645	800.668	890.507	871.897	889.38	694.809	708.754	728.699	733.576	710.65	633.066	856.347	884.845	909.278	948.21	951.024	934.181	861.711	840.182	847.232	1119.14	1026.43
1553956_at	1438.3	1571.97	1402.28	1360.43	1223.6	1430.36	1294.31	1237.15	1492.3	996.923	1010.39	1069.46	1404.55	1602.08	1607.59	1306.11	1282.55	1399.08	1487.22	1468.85	1484.46	1194.03	1032.68
1553957_at	190.688	198.399	196.039	152.151	291	236.37	198.47	182.846	176.799	248.149	205.992	168.086	188.279	221.553	156.161	203.397	187.424	240.37	120.658	95.3001	139.301	180.305	310.692
1553959_a_at	1320.63	1434.07	1468.49	1350.77	1223.79	1160.93	1476.89	1524.23	1468.25	1580.78	1455.52	1228.12	1764.81	1502.79	1798.82	1367.35	1393.78	1264.57	1858.08	1555.7	1559.13	1417.57	1455.09
1553960_at	265.149	289.826	265.492	200.768	238.374	297.485	219.367	184.49	235.182	225.073	285.457	296.073	239.022	223.827	294.665	284.761	283.693	219.245	202.367	206.177	212.009	307.025	278.368
1553961_s_at	143.372	92.5969	99.5611	83.1233	159.685	79.1801	116.611	117.047	104.991	84.0117	86.4157	115.169	129.809	121.769	134.226	83.9032	124.679	133.366	96.6878	59.7218	84.6012	147.231	139.182
1553962_s_at	46.6208	17.911	57.4069	56.1377	75.9545	74.1253	36.5991	68.032	64.3243	77.0639	79.1769	62.8515	64.6884	43.76	68.7769	53.1435	26.4413	79.1236	40.9785	45.363	79.179	55.3303	62.7061
1553963_at	1.33377	2.885	2.6352	1.94823	4.7526	2.03363	1.67	4.01439	2.98768	2.56047	1.09072	2.64762	1.11298	1.44352	1.4961	2.90735	1.09232	2.68071	1.23713	6.19024	5.7284	1.24742	1.23264
1553965_x_at	1.85613	1.29731	5.57119	2.71001	2.19602	2.91696	1.90787	4.18913	3.78672	3.46458	2.96691	3.02167	1.55415	2.67062	3.4866	1.81535	2.74398	2.4972	2.87961	3.35436	2.94616	3.94954	2.63572
1553967_at	12.8414	27.7055	38.2386	45.5858	69.6604	70.5131	34.1072	64.1643	23.958	38.4624	62.4971	84.2588	78.2593	29.4103	48.8682	49.1303	21.7283	70.2658	60.2851	12.9577	16.2668	49.3529	93.1233
1553968_a_at	260.124	368.108	350.508	354.536	448.904	386.998	341.654	392.895	327.225	469.986	425.493	419.268	305.844	269.595	254.206	360.649	335.696	392.168	259.834	270.397	269.689	318.108	401.73
1553970_s_at	39.4122	9.86222	9.44871	9.53596	39.9069	6.47161	7.62812	41.9284	5.39304	20.2936	12.623	15.0343	3.77488	17.3649	62.9592	21.6214	8.94566	21.1795	66.4471	8.44977	8.28795	22.3131	2.93621
1553971_a_at	107.723	99.7814	102.754	120.356	107.073	99.1392	75.6593	86.4902	95.4436	58.0834	72.4152	60.4281	117.638	68.9792	97.5768	73.2562	91.0844	128.735	55.5827	81.3187	63.1962	111.832	52.4228
1553972_a_at	69.2845	86.6459	50.3801	73.484	99.7918	70.6542	81.6506	88.3609	100.354	73.6665	80.5366	170.514	48.4413	36.5187	62.1571	36.4654	80.6457	106.501	98.9792	90.6878	62.5062	65.4796	93.5685
1553973_a_at	45.3926	43.5978	45.6996	24.4314	35.0324	30.1223	79.5878	84.4477	84.1596	490.396	601.762	310.7	77.7037	68.8302	60.5784	72.1826	74.6938	56.7987	71.5761	77.6935	84.4585	126.673	174.902
1553974_at	678.906	690.12	636.337	749.971	792.099	851.824	710.693	718.95	666.773	679.583	702.724	774.405	551.67	561.17	567.444	634.264	738.976	772.584	542.109	619.717	563.436	556.134	533.835
1553976_a_at	723.078	725.409	710.371	829.983	908.186	759.857	772.298	873.464	765.525	1015.63	1074.34	1048.82	641.868	600.919	667.587	700.907	713.52	839.284	675.753	652.15	448.081	605.33	724.28
1553977_a_at	158.045	157.391	109.795	134.788	184.441	170.594	78.2233	88.3707	85.5092	153.13	127.265	160.92	125.839	93.0238	100.546	124.311	172.591	146.977	118.869	118.326	119.415	110.309	110.685
1553978_at	482.342	404.47	462.338	491.439	424.44	393.809	477.646	441.649	498.236	415.026	438.102	414.479	538.854	458.368	473.775	476.381	478.723	500.043	473.228	508.705	400.577	563.011	614.128
1553979_at	4410.63	4596.83	4233.91	3504.29	3284.61	3626	4507.33	4328.03	4768.6	3606.89	3809.87	3630.23	4360.09	4139.39	4647.24	3546.44	3420.98	3319.24	4839.06	4524.89	4391.6	3358.18	2870.29
1553982_a_at	226.008	235.93	223.563	301.584	319.406	308.549	195.203	232.654	207.022	43.2663	109.791	110.106	232.83	188.536	196.524	242.078	284.709	295.621	180.98	115.442	170.6	145.67	165.928
1553983_at	565.717	603.055	488.438	497.302	606.803	465.174	606.374	547.786	449.138	563.109	414.722	452.466	527.519	516.205	447.676	363.573	549.538	688.578	432.13	468.904	427.295	454.657	432.905
1553984_s_at	3523.57	4228.59	3491.27	4272.39	4136.6	3748.95	3292.01	3630.47	3471.86	3200.35	3422.69	3590.66	3439.09	3316.86	3144.64	3872.61	3710.74	3971.32	2834.02	3149.69	3264.91	3521.42	3463.07
1553986_at	302.311	280.371	266.453	304.085	365.618	387.652	214.357	226.515	254.131	165.789	209.677	224.146	299.507	273.636	316.466	349.109	317.271	405.506	323.077	347.033	370.442	319.99	434.316
1553987_at	893.344	773.087	844.8	1157.24	1084.68	1214.7	840.979	940.097	767.756	1108.43	1024.25	1139.44	888.611	783.766	778.838	997.181	1172.19	1132.64	767.727	809.891	780.435	899.631	944.355
1553989_a_at	53.6064	62.5871	57.4508	71.9757	71.444	45.3072	70.8908	63.8176	84.7786	63.4571	52.2997	24.1951	42.8753	90.1989	64.27	129.148	127.298	71.0399	103.639	86.7504	92.1046	218.47	337.042
1553990_at	79.323	63.7085	74.8368	59.7554	74.0899	80.7794	98.6754	67.5144	80.7531	79.7648	34.7513	75.9857	69.7891	63.0544	38.8055	68.6802	114.588	103.162	59.0739	14.5893	63.4341	124.91	114.058
1553991_s_at	142.693	126.08	119.76	146.402	152.238	142.716	82.8903	101.576	122.331	110.069	118.38	93.1003	109.403	117.013	82.5659	171.228	139.011	152.084	94.8496	115.548	125.297	128.507	163.495
1553992_s_at	208.25	197.088	157.312	262.761	342.57	315.831	229.661	172.531	167.519	247.258	228.572	239.963	155.284	184.353	159.014	358.859	319.36	313.614	177.128	207.238	169.79	225.861	194.771
1553993_s_at	931.189	810.992	1058.29	1028.38	921.556	1036.32	990.02	785.02	883.719	891.269	968.763	940.523	1017.19	946.326	1132.58	1084.36	1062.08	922.554	1070.52	1054.25	839.181	1179.48	1078.87
1553994_at	646.418	528.46	572.441	572.917	619.194	582.17	600.993	655.512	383.62	1731.09	1848.31	1815.07	780.169	1012.86	810.591	790.864	854.966	807.973	700.613	637.437	527.223	1403.03	1507.95
1553995_a_at	455.426	439.62	428.163	411.015	380.368	375.506	339.249	298.152	374.144	1284.6	1293.1	1252.43	555.203	553.036	548.24	576.875	546.146	567.218	595.76	521.339	485.119	993.278	889.406
1553997_a_at	319.909	275.557	277.408	284.142	291.885	383.194	260.757	373.409	276.335	344.132	438.378	431.836	197.618	220.945	234.63	196.346	252.777	225.259	223.629	251.553	193.975	217.267	275.959
1553998_at	71.9247	107.47	54.6209	54.5678	57.6131	119.144	80.3359	74.0019	70.1337	65.2659	63.3338	83.345	100.257	48.8908	76.4926	58.4274	73.9952	66.4371	73.3549	65.548	96.8115	65.4363	66.6833
1554001_at	173.408	142.09	82.1126	128.548	135.01	188.518	142.669	137.283	134.432	86.5831	146.21	78.8023	174.549	202.485	129.505	163.198	239.475	173.939	152.628	183.662	169.561	125.192	197.081
1554003_at	235.417	320.633	200.581	236.408	217.367	290.802	144.028	229.894	192.386	227.416	244.346	219.249	272.74	285.741	282.738	277.321	249.653	250.498	283.934	360.986	250.355	279.524	224.779
1554004_a_at	235.428	193.316	223.427	261.568	209.089	263.087	162.933	162.048	157.88	210.565	222.957	223.965	226.781	225.783	301.097	266.794	283.055	247.649	261.903	241.27	271.623	339.089	349.068
1554006_a_at	295.974	278.591	342.702	321.295	381.759	331.12	264.01	306.484	266.611	203.923	221.536	218.126	353.338	333.23	359.595	417.4	474.965	498.214	415.153	393.178	404.799	441.378	555.757
1554007_at	486.13	524.004	530.971	702.214	816.275	687.25	407.498	370.512	427.341	486.889	593.902	604.124	303.297	305.526	323.577	459.632	455.601	500.283	302.105	195.116	233.746	446.838	483.932
1554008_at	252.774	210.943	207.931	237.3	201.873	180.899	206.8	238.757	219.885	350.975	356.38	401.044	250.105	240.791	217.803	207.553	150.096	159.598	226.502	301.584	222.617	170.878	179.81
1554010_at	314.465	389.939	342.879	354.993	343.645	290.901	354.7	311.933	325.553	338.508	282.347	241.363	570.256	504.715	549.846	348.243	338.807	402.638	491.704	490.132	504.089	298.814	330.53
1554012_at	28.5724	27.8968	33.8039	22.7083	41.9304	18.6187	41.3501	11.9479	15.7816	36.1013	29.9243	24.5408	20.2533	34.4643	16.6484	37.0786	24.2936	17.3444	31.6772	48.3273	35.3694	33.6722	46.6602
1554014_at	686.799	516.079	523.662	561.712	660.255	592.305	754.836	621.391	640.313	663.028	713.737	693.735	683.644	698.932	715.443	521.346	530.093	583.097	828.492	797.632	729.627	624.99	561.629
1554015_a_at	241.014	134.321	241.293	264.434	257.614	220.937	259.018	199.232	201.019	274.863	247.626	178.894	204.578	221.352	228.347	149.886	169.484	180.178	280.392	244.691	246.514	208.135	224.14
1554016_a_at	293.64	465.37	408.264	323.178	404.35	347.463	392.511	426.49	321.343	307.987	384.301	349.518	356.172	366.497	357.454	333.164	354.049	422.81	355.41	366.971	318.944	258.192	407.658
1554017_at	47.6699	64.1191	36.4464	63.2755	64.2527	16.6547	51.9152	28.2346	17.0623	44.604	12.2455	48.9486	73.7463	52.5175	53.2285	64.5423	34.5333	80.3194	21.5247	56.8395	31.0905	47.5137	61.0786
1554018_at	19.5144	21.0671	38.488	21.0847	39.9845	16.6889	44.9188	27.2689	4.97817	21.884	26.3068	3.84812	53.7331	55.727	28.8689	28.3851	12.6362	41.7752	15.5206	31.5779	33.0746	79.51	41.1507
1554019_s_at	178.312	236.276	177.327	233.149	231.163	188.039	151.004	149.752	173.238	217.576	196.145	203.686	181.235	141.901	157.265	249.593	199.88	225.504	120.125	135.627	120.646	209.395	142.587
1554020_at	226.516	147.576	285.397	254.537	293.227	249.572	195.083	154.924	205.933	219.39	242.82	237.192	322.733	220.773	319.234	351.617	328.476	265.778	288.15	294.507	228.062	267.209	254.342
1554021_a_at	730.072	690.418	597.484	721.86	588.755	735.38	831.045	664.99	808.132	630.361	725.905	668.605	833.149	806.877	824.4	763.475	643.057	644.839	756.48	982.302	744.673	742.33	648.001
1554022_at	4.13969	19.3222	3.65186	25.5849	3.44019	3.48517	8.80313	26.042	26.2671	5.76543	6.08884	15.9415	7.94068	1.97067	9.26882	14.7461	11.3355	25.2023	4.3429	4.62517	3.83734	21.5244	24.7133
1554023_s_at	83.2356	82.3632	16.1438	39.944	70.4979	94.5869	36.6288	13.8527	64.0964	16.28	25.275	9.64849	73.5366	57.6628	34.9754	41.7883	46.2262	71.4516	58.9755	10.3913	53.5841	29.5042	67.6578
1554026_a_at	139.783	171.728	119.415	113.3	126.283	112.976	172.904	179.071	149.736	146.698	106.658	122.47	196.695	191.432	138.405	130.795	117.072	119.363	224.602	211.776	242.136	123.195	127.993
1554027_a_at	45.9402	46.2104	8.26397	17.2058	23.9512	34.1319	52.7886	17.5673	13.5511	2.76937	13.273	14.3808	33.033	2.44926	35.0183	3.72323	4.27031	31.1402	34.2231	35.5077	32.1223	22.389	33.3577
1554029_a_at	325.488	217.483	266.802	330.391	262.916	274.928	355.566	234.698	275.571	304.455	262.959	273.687	326.877	319.155	246.675	323.689	247.437	269.252	320.579	300.584	270.717	305.732	271.223
1554030_at	49.2481	84.3114	65.6958	30.7861	53.2011	51.6263	37.7119	75.6908	29.8115	70.7996	66.7559	78.1408	54.6477	34.6826	75.42	65.5458	59.9696	53.1883	57.826	80.9082	65.103	67.0197	30.6165
1554032_at	45.45	42.1177	3.52495	18.2944	10.8574	24.9215	28.4993	38.923	26.4539	53.6366	22.3635	7.88648	14.275	20.0681	8.67363	14.9637	41.1422	55.163	19.1365	32.1033	11.8057	31.6599	43.5911
1554033_at	1.23698	3.78023	6.85053	1.45183	13.5018	2.19318	1.91415	2.00606	3.32906	1.46537	11.5181	1.96677	4.41812	18.771	1.66732	4.59204	1.51524	1.98589	19.2166	4.22665	3.05804	2.21882	5.90717
1554034_a_at	2.64156	16.787	4.11382	41.0483	21.7865	29.6234	5.12841	2.89069	3.20333	14.6296	34.9645	7.90008	12.9835	15.4521	6.82298	5.74947	19.8223	10.82	15.6545	3.45402	15.443	23.3933	13.5837
1554036_at	291.223	292.992	237.321	86.6287	95.0778	81.5511	393.202	397.653	431.564	101.995	92.0014	96.8982	262.572	361.365	346.944	109.401	94.0796	76.8592	398.259	527.07	421.876	89.2244	148.254
1554037_a_at	203.864	211.604	166.816	125.586	94.7679	104.466	228.625	260.753	224.799	98.2063	116.609	119.062	170.073	229.527	216.961	98.4288	116.476	100.24	264.888	238.178	234.046	115.493	118.261
1554038_at	103.998	164.539	125.068	170.152	105.966	171.005	170.931	141.901	110.216	83.3586	110.875	145.338	189.819	143.93	197.885	162.558	155.65	191.221	140.014	150.892	183.792	150.249	230
1554039_at	39.7172	23.5987	49.0697	65.7176	59.5421	48.6499	35.4746	47.1412	13.7906	8.69851	61.3796	69.5923	40.3746	46.4178	87.4785	76.7698	38.1942	68.1216	36.6689	29.9458	76.9941	49.5584	26.2763
1554041_at	3.84528	7.69313	35.1953	41.098	50.5253	43.2491	5.76474	23.3014	37.9353	17.2324	17.11	9.777	30.0167	36.4928	41.5765	2.45582	40.0863	34.7057	4.87576	3.26334	4.56568	10.4223	18.7931
1554042_s_at	135.426	161.192	125.315	164.203	143.069	151.507	168.141	127.049	139.708	155.177	103.567	162.124	181.67	145.77	120.048	108.385	167.469	168.195	114.473	109.882	103.692	151.043	200.162
1554043_a_at	71.2465	34.4705	67.0351	77.317	76.878	84.8355	43.6213	36.9043	43.8093	89.1529	81.8651	97.6762	43.1053	48.4772	69.5891	74.9354	74.7541	78.298	43.8303	71.5391	59.2491	65.7836	61.7118
1554044_a_at	54.8893	56.4212	48.4386	57.8873	35.9311	26.5359	40.0293	52.1071	44.2466	72.2727	64.7541	78.308	65.1149	67.4131	73.1991	64.4599	74.5374	97.276	53.5838	61.2495	80.3804	47.2654	58.7542
1554045_at	63.1161	41.7299	83.5841	63.5351	78.5519	81.5762	77.7541	41.2821	57.1739	56.0657	85.1294	100.959	78.7358	94.2254	90.0066	64.0026	48.1768	69.5449	71.7456	83.0987	76.2041	84.6826	74.8038
1554047_at	214.331	154.34	163.527	154.462	156.492	262.345	201.149	170.134	192.75	181.539	189.304	179.048	196.545	205.209	212.228	125.506	196.994	173.885	238.623	185.531	164.704	202.51	245.395
1554049_s_at	136.067	240.959	238.051	179.187	225.155	225.692	179.397	177.934	154.721	145.778	123.949	73.2765	191.574	255.486	186.926	116.377	175.377	235.825	186.315	152.022	203.246	190.012	173.433
1554050_at	50.3209	88.3959	69.4214	57.7766	58.0563	51.1624	54.3814	24.4162	64.5585	98.2405	71.3238	107.882	41.1823	50.501	73.9823	84.0998	112.931	111.31	69.6375	78.9973	100.24	83.5895	99.8847
1554052_at	402.92	476.056	367.13	425.786	417.68	458.216	395.973	367.418	374.382	381.022	389.447	424.25	380.677	420.927	372.877	359.843	410.382	397.743	374.311	301.723	361.387	349.231	370.134
1554053_at	124.726	143.487	116.264	97.9604	120.71	81.5896	147.061	117.037	128.501	127.907	166.242	159.184	156.749	121.319	151.764	121.154	126.733	125.535	152.637	159.339	166.881	140.464	135.684
1554057_at	820.122	828.149	802.613	907.96	937.263	860.03	901.216	1063.4	610.933	1011.23	897.935	896.581	686.337	906.06	681.314	728.2	776.986	919.778	833.806	1007.52	738.662	618.007	644.746
1554059_at	71.1378	126.93	77.277	83.1681	97.0103	75.53	62.5107	64.7003	89.2142	106.813	71.1397	67.629	93.9773	86.205	91.3804	78.9555	99.7071	104.999	84.2337	68.5787	67.2354	72.5452	72.0588
1554060_s_at	28.2521	23.6495	69.8546	41.2437	16.076	82.5345	42.3887	78.7382	62.0471	56.2628	41.6693	45.4262	71.2005	67.0669	92.1678	70.2818	53.8808	55.2619	52.9642	64.7582	50.5462	55.0382	45.2479
1554062_at	44.3437	32.0347	22.7282	42.8766	26.5024	31.9826	30.1383	33.1967	37.4141	33.8709	39.5445	38.2365	12.3166	14.4095	31.1044	26.8706	41.7616	15.9681	26.9014	29.4458	39.652	46.4987	7.45655
1554063_at	288.897	263.273	230.123	285.683	238.049	296.334	240.877	304.757	209.96	278.172	323.419	296.958	235.39	330.018	240.717	216.637	238.863	293.719	297.749	268.206	308.319	264.627	261.324
1554065_at	40.7359	88.0291	34.9092	34.6488	74.4459	53.5481	79.0407	71.4522	76.5172	26.4125	57.422	91.5619	52.0329	73.0133	81.1735	53.879	25.7329	68.3601	7.04192	88.905	86.3615	36.7525	82.8441
1554067_at	698.539	691.801	707.579	571.897	693.247	929.111	503.759	409.88	659.154	692.668	690.15	817.142	553.734	687.316	645.344	716.126	712.384	742.474	406.482	435.519	539.879	571.855	422.578
1554068_s_at	119.37	184.024	122.819	129.167	124.111	200.892	95.8741	116.971	88.0194	164.856	160.719	169.138	131.841	116.731	154.541	174.662	150.559	145.016	98.2993	98.6128	117.025	140.83	113.162
1554069_at	8.63988	19.7673	25.1391	18.0652	10.874	10.9681	6.30828	20.1979	19.5158	22.1525	8.42698	28.3717	8.99254	2.728	6.23245	21.4028	47.2719	7.26264	19.5294	22.3716	43.1459	17.7644	27.8909
1554071_at	2.47493	2.74806	3.81125	21.3257	9.01112	14.9361	13.8346	16.3874	3.14823	2.66142	4.84502	3.14738	7.77821	2.21692	7.12068	21.0073	20.0569	3.29354	1.47466	5.46912	17.5001	4.47067	30.6989
1554072_s_at	19.3668	12.5517	23.9775	13.532	11.974	17.0125	16.5208	17.7782	6.6615	12.7848	8.88851	13.9933	9.57665	6.16424	19.1715	15.5959	12.2687	22.3938	0.244946	4.88479	13.8299	12.5673	20.3052
1554074_s_at	20.5819	7.97356	33.4106	57.0784	59.1832	23.2592	56.824	13.0501	11.9742	30.8025	43.5325	17.7613	14.3036	28.4874	27.8827	9.01335	50.7848	25.2759	11.2585	33.953	47.0072	13.3194	15.6148
1554076_s_at	237.22	292.035	300.493	324.863	356.71	316.038	243.671	300.279	262.876	266.025	274.497	269.102	268.373	233.251	297.363	328.377	336.412	391.575	270.628	321.205	280.784	335.119	328.108
1554077_a_at	172.522	173.654	188.685	304.433	290.96	234.595	201.958	190.869	202.899	257.025	143.551	268.838	222.446	190.107	166.74	209.066	200.616	358.425	146.6	212.175	180.207	326.017	290.561
1554078_s_at	3831.75	3966.06	3795.57	4140.25	3718.97	3663.24	3781.9	3664.62	3702.93	3402.34	3300.8	3239.84	4066.15	3762.23	3773.63	3710.87	3681.53	3644.82	3225.1	3373.61	3224.29	3122.39	3364.66
1554079_at	685.213	862.563	664.593	765.088	708.166	657.147	611.468	708.364	593.709	654.436	620.552	653.214	693.687	580.624	680.996	662.174	630.801	673.837	655.494	650.381	616.045	649.239	677.031
1554080_at	938.253	905.643	958.838	844.418	801.939	728.737	864.588	860.188	884.051	741.712	768.765	664.806	898.433	894.813	1019.82	865.726	902.689	733.708	859.823	961.735	923.143	882.014	789.467
1554082_a_at	938.643	1156.4	975.116	827.581	793.799	729.983	1097.64	1144.18	1042.43	803.486	764.478	737.584	1081.3	925.445	944.519	659.001	660.052	610.719	907.027	920.292	837.405	694.348	576.373
1554084_a_at	1395.06	1615.96	1485.86	1118.41	1225.79	963.851	1492.98	1590.98	1341.33	983.179	848.306	871.201	1300.31	1519.24	1318.74	974.093	963.123	1026.09	1254.16	1333.49	1274.67	897.567	829.012
1554085_at	670.659	711.298	490.118	416.285	379.927	427.994	790.825	661.344	620.566	463.291	358.676	299.694	688.176	550.812	576.131	420.899	428.064	397.692	544.092	597.031	508.517	390.318	369.164
1554086_at	105.944	182.463	142.051	94.1416	145.468	84.3156	105.713	102.117	130.273	157.579	119.217	113.25	163.373	144.59	149.881	99.0972	125.919	110.655	108.497	139.421	113.427	107.096	140.108
1554089_s_at	3976.83	3561.64	3895.43	3537.12	3083.99	3116.14	4000.16	4501.43	4006.71	3257.4	3653.29	2925.63	5395.6	4599.78	4653.92	4517.52	4447.89	3762.46	5071.64	5355.69	4893.05	4611.04	4466.62
1554091_a_at	116.421	137.88	120.894	125.347	136.749	93.9574	111.314	79.329	112.981	111.544	114.434	152.115	106.952	125.729	127.157	104.745	145.313	76.813	112.87	148.899	104.196	107.087	148.302
1554093_a_at	737.872	820.891	798.401	826	879.076	850.727	700.599	666.332	709.739	654.589	609.38	673.276	850.071	754.435	839.426	849.135	761.725	926.85	683.066	680.656	708.484	759.085	843.399
1554094_at	95.956	105.002	98.6561	65.504	8.77934	62.3149	42.5298	57.7515	87.0905	72.0145	53.1673	80.2277	62.9715	85.1382	87.995	64.9164	74.1863	80.2457	71.5684	48.1936	78.5256	77.2181	77.5124
1554095_at	297.371	380.982	335.536	252.616	267.51	270.897	284.013	262.449	285.987	187.009	145.241	165.558	271.694	266.671	311.553	215.722	218.189	248.814	289.06	268.458	267.888	232.238	215.415
1554096_a_at	64.4404	94.1105	57.837	111.437	74.308	84.0777	77.4406	79.6742	53.1743	89.7016	79.8338	26.5169	85.5635	98.5777	109.932	78.1457	76.3906	41.2892	95.6418	61.9253	111.972	87.8549	50.1527
1554097_a_at	111	137.433	126.241	115.483	140.106	138.894	97.0322	112.878	106.863	121.107	80.8133	113.345	118.502	127.074	149.885	131.39	125.255	188.501	145.699	140.095	154.96	161.282	209.405
1554098_at	175.402	180.958	151.721	127.197	172.333	196.393	180.316	143.681	131.88	141.148	139.178	139.222	159.034	134.33	93.1096	144.796	177.02	139.887	165.679	130.585	183.692	161.352	206.699
1554099_a_at	153.653	164.258	136.882	167.278	169.639	175.197	148.688	164.285	145.572	154.968	187.644	127.989	148.411	120.279	137.18	167.107	168.137	188.738	156.402	97.8748	157.782	178.36	123.449
1554101_a_at	228.106	239.485	237.961	272.161	282.892	269.97	244.262	232.259	210.875	273.378	239.581	280.985	251.842	238.356	198.592	252.451	209.468	230.535	241.941	229.762	220.835	256.704	197.937
1554102_a_at	254.032	278.929	239.147	185.752	184.36	202.084	213.583	230.037	192.686	232.686	217.539	291.308	177.224	241.642	191.073	174.15	166.014	197.061	217.641	229.573	205.083	216.533	184.592
1554103_at	95.976	92.2508	122.282	101.253	122.596	197.057	74.3205	146.408	136.519	109.701	138.175	94.7723	114.42	130.402	131.311	143.472	174.35	168.922	84.4986	127.399	95.0546	108.761	167.022
1554105_at	257.061	290.801	282.387	167.831	269.422	225.981	226.22	256.651	275.936	217.314	220.107	238.106	231.894	270.801	247.424	224.962	306.955	242.853	255.991	285.289	229.692	238.687	248.981
1554106_at	327.738	246.779	331.034	497.186	429.064	388.249	325.55	322.791	313.771	405.004	354.287	315.071	440.362	483.645	460.564	449.461	400.724	396.159	476.087	413.412	375.28	459.6	437.918
1554108_at	58.2021	78.0093	60.2376	87.2675	55.1968	124.733	39.4753	58.5168	58.1048	71.2925	82.7386	97.8574	48.0517	22.9928	45.1608	75.0455	82.6629	74.3443	59.3952	57.2846	69.1435	74.2698	66.0407
1554110_at	86.3396	108.854	75.3202	98.9625	73.9409	80.4197	122.574	144.959	128.765	151.24	88.017	127.986	130.178	113.317	73.6469	81.2582	84.7259	93.5857	153.287	101.169	106.643	123.795	118.489
1554112_a_at	252.482	234.44	209.542	177.576	168.037	275.66	264.018	208.59	273.457	266.37	116.889	240.924	210.599	287.065	157.978	205.266	249.363	315.361	267.597	263.372	226.794	214.796	279.873
1554113_a_at	51.9193	82.5667	84.8549	60.2945	102.576	51.6368	62.6336	46.7018	38.806	87.7753	56.3614	83.501	16.4993	55.8639	95.9693	32.9871	25.5529	80.7025	35.2358	17.994	55.5545	64.2624	91.0102
1554114_s_at	110.378	94.0417	89.5778	102.511	92.7446	107.358	113.585	130.429	121.342	73.3085	90.1254	78.4098	110.149	99.433	133.534	108.411	92.5052	82.6894	132.461	123.891	112.929	116.482	103.914
1554115_at	9.82968	14.8747	13.6624	27.587	19.2763	13.7168	4.60218	18.574	2.50461	30.0768	6.2862	2.47817	23.8848	21.8517	62.6342	29.6354	31.7634	33.2265	6.83817	36.6577	9.157	18.5165	37.6593
1554116_s_at	108.704	197.361	71.1505	88.5313	98.3014	80.9415	96.5947	74.3051	88.2574	93.9414	67.3292	125.156	101.505	96.8985	60.5193	111.623	90.065	112.789	111.961	82.4452	95.3406	131.093	115.81
1554117_at	24.3822	20.1128	59.2394	21.2299	24.1243	19.183	42.3372	30.0471	60.553	20.5517	15.9067	17.1432	18.2089	38.5095	12.3768	21.4992	21.8677	8.72842	10.9659	39.5323	24.4327	8.00439	45.2255
1554119_at	74.0496	56.7955	63.018	108.065	128.471	136.334	99.4787	133.037	101.493	97.4461	97.0412	92.0182	126.572	132.77	111.817	126.788	136.124	109.176	116.905	85.3505	146.075	101.561	138.043
1554121_at	4.40407	4.16416	3.7136	5.37232	23.8295	9.69878	2.58408	3.84807	3.70942	8.28013	2.38929	2.70659	2.34751	1.7614	3.97439	2.264	4.49537	14.2101	3.05618	3.14568	6.02459	11.3482	4.23529
1554122_a_at	29.6365	51.297	90.4075	71.4361	24.4303	42.0422	49.4859	39.3832	85.8116	81.4997	53.1222	81.3461	54.6025	49.2737	53.3537	49.5201	77.8794	60.6766	62.1894	112.82	44.3986	48.7034	38.428
1554125_a_at	22.7778	4.1417	19.9015	3.9651	13.9663	1.68462	4.13935	2.42496	7.173	3.98041	5.68256	6.46988	2.91023	1.82237	2.04717	1.17623	6.71522	2.29075	8.84895	4.6898	25.719	9.22219	2.44204
1554126_at	699.087	795.672	934.823	556.626	681.688	756.398	745.943	746.981	811.952	578.232	619.925	593.37	860.155	878.177	790.066	620.382	733.744	833.314	817.195	952.554	879.969	776.15	961.893
1554127_s_at	902.654	836.756	902.323	655.902	680.981	590.628	952.478	999.976	724.477	509.736	489.506	468.123	983.326	980.378	877.292	756.983	817.005	872.447	1062.67	1003.36	1355.22	1032.6	1137.79
1554128_at	101.307	28.0192	64.9931	44.9153	66.6284	40.29	7.18783	42.9691	12.8399	98.0266	27.972	57.8576	30.0595	28.0551	56.0635	85.7897	78.7173	70.8683	59.0957	3.28138	37.7327	89.1302	85.1672
1554129_a_at	23.9494	66.4242	13.5311	8.33546	10.0224	34.0162	4.87042	7.92555	3.53168	24.7159	4.18363	24.0326	4.7213	6.86226	49.8153	17.9893	28.107	7.06135	7.07353	9.7017	3.49096	10.2228	6.3956
1554131_at	18.9136	23.3739	14.1511	1.38543	1.67009	14.6835	18.1181	7.33397	18.5829	17.6523	7.3514	31.1755	12.3755	20.4858	17.5304	10.3574	16.7138	1.91467	18.1694	19.0266	22.949	12.8648	7.7225
1554132_a_at	373.39	319.64	322.385	374.001	348.604	310.747	334.04	372.003	353.013	289.403	280.347	277.153	445.816	402.422	325.853	383.728	301.614	341.122	346.919	365.833	466.122	380.065	316.874
1554133_at	61.8342	45.835	80.8417	44.4737	58.5881	44.4407	41.4027	40.2874	72.3788	46.3672	24.2653	38.9956	34.593	76.6531	54.2918	36.4798	25.826	35.6822	67.7399	73.2746	42.1732	55.1679	30.6401
1554140_at	34.773	25.8037	42.1202	25.6173	31.3469	27.7581	23.0336	29.3393	32.3454	36.4117	42.8214	33.4907	24.5978	14.3025	17.2467	34.4117	31.7036	24.7897	12.8451	36.2484	33.6287	8.22338	33.9455
1554141_s_at	2.85314	5.92952	3.48707	2.83393	2.81283	27.2873	3.86684	5.82425	6.64932	11.0098	6.92564	12.6813	6.71142	1.7579	4.53972	5.00945	3.25861	1.66915	3.79584	6.52322	2.79714	3.76286	3.48377
1554142_at	24.0952	39.9769	21.6575	28.5764	24.9128	20.2674	36.1708	15.0767	25.2166	3.1602	21.4944	11.9571	9.94058	31.9919	38.5002	25.0857	20.7305	19.0891	10.5025	26.0574	10.4132	21.9576	37.6137
1554143_a_at	42.1665	22.715	47.4646	36.7824	29.1231	57.573	53.2269	38.2218	59.3753	61.1537	40.1699	45.3933	68.7682	41.8029	41.3208	30.261	47.8205	50.7787	36.5596	35.7915	32.5872	31.4671	40.8725
1554145_a_at	166.589	172.556	177.581	171.636	134.422	152.313	177.133	169.317	149.507	139.281	144.161	127.62	171.475	191.87	170.025	151.498	163.35	168.091	175.199	211.562	160.056	173.125	178.865
1554147_s_at	52.9101	62.6428	38.0019	28.7282	5.37401	43.3579	14.2181	11.1697	58.5317	37.9762	2.98329	22.209	45.387	24.1562	30.4167	17.234	27.4465	91.401	8.04843	41.7291	58.2418	26.5274	7.11388
1554148_a_at	615.695	835.472	575.845	434.36	479.437	462.172	606.603	585.229	594.722	439.316	395.567	425.187	654.415	670.498	611.359	475.809	466.85	509.607	634.845	627.102	689.591	518.808	477.044
1554149_at	2017.17	2143.22	2024.05	1811.05	1692.09	1988.37	1948.82	1808.68	1981.21	2280.2	2533.71	2605.15	2111.17	2118.24	2152.25	2299.43	2164.31	2174.79	2204.49	2275.01	2501.1	2482.74	2459.67
1554151_at	172.28	146.266	69.5224	155.758	127.026	119.644	86.0662	127.358	96.4216	124.298	108.522	152.208	126.458	95.0852	69.3501	104.096	106.882	146.807	114.938	95.8721	125.623	84.3648	142.191
1554152_a_at	149.786	132.44	111.24	139.643	184.886	140.083	106.857	144.566	100.914	101.659	114.215	114.022	135.37	135.211	142.566	146.765	144.694	123.06	130.342	148.772	119.517	138.145	146.514
1554153_a_at	127.963	101.007	136.59	347.885	395.793	373.698	109.518	118.462	133.492	459.606	342.717	391.165	117.718	104.68	143.42	281.58	356.921	273.161	142.21	140.858	127.203	320.103	263.162
1554154_at	318.085	309.069	341.868	299.708	312.933	342.882	328.692	292.164	324.013	317.208	303.297	322.151	337.383	288.722	276.497	298.396	291.477	305.784	365.803	317.289	226.623	277.397	270.186
1554155_at	393.088	405.122	398.896	221.722	192.2	175.136	422.035	419.893	406.415	305.028	341.673	266.462	335.128	389.247	430.587	192.971	202.001	202.748	376.424	348.64	411.447	237.659	177.24
1554156_a_at	2.31563	20.7656	1.89003	2.29651	3.40917	1.82218	1.35912	2.39175	3.01209	1.68616	4.64744	10.363	1.90861	4.35321	2.03057	1.22311	1.72177	4.38536	2.06873	4.616	7.13218	2.66416	2.41289
1554157_a_at	18.618	47.3207	2.07159	45.4503	9.60568	38.0697	24.1972	58.7824	23.6844	11.1542	24.8398	1.85989	54.6781	49.4563	64.952	17.5947	29.9332	62.1652	45.1796	16.4906	39.5432	34.8666	50.5092
1554158_at	96.1265	89.5929	57.127	83.2658	92.4764	84.5465	84.482	87.8822	102.754	61.8471	56.0003	66.8907	52.6478	87.6765	61.6377	84.406	75.6254	70.7574	101.467	80.3851	64.5312	73.2306	45.8637
1554159_a_at	55.2033	39.4207	67.82	73.8365	92.9504	16.9442	36.8654	70.7722	43.1718	99.5582	59.9977	13.6269	76.297	54.6779	65.366	72.4196	29.4838	13.5629	10.5921	49.0361	6.06359	93.7717	85.8575
1554160_a_at	122.317	131.688	50.792	85.8015	73.6811	90.9346	61.884	96.783	85.3372	101.762	57.6106	112.327	110.802	58.4674	110.893	89.6057	100.254	127.35	82.3955	62.935	66.0069	88.721	102.644
1554161_at	139.688	220.094	130.822	129.603	159.497	241.982	96.2769	97.1182	96.4641	129.208	130.024	194.847	134.18	88.9201	139.151	221.735	215.092	228.988	116.968	115.85	131.019	207.436	177.514
1554163_at	177.796	174.069	160.355	132.187	133.978	102.826	183.858	178.983	131.623	126.927	119.315	79.3164	194.627	151.795	137.308	119.01	120.948	119.638	139.788	134.965	144.691	128.448	81.302
1554165_at	2.33303	3.1619	2.7293	2.10546	9.89601	1.12069	0.984468	2.16104	5.25718	4.70625	12.3761	10.714	2.27381	1.10312	12.5281	3.09547	1.4635	3.50459	24.8631	1.28063	3.58643	10.4837	3.46296
1554167_a_at	1274.05	1096.16	1378.14	1657.58	1448.36	1292.13	1467.45	1492.43	1164.79	1727.66	1376.77	1581.22	1206.11	1345.89	1347.21	1398.72	1483.48	1347.55	1168.35	1173.6	1161.94	1362.53	1709.94
1554168_a_at	3185.25	3440.46	3343.2	2690.96	2748.64	2958.12	5223.81	5348.71	5941.46	6789.23	6688.37	7113.56	3549.68	3948.17	3828.37	3657.59	3353.78	3161.18	4321.75	4007.28	4320.46	4543.8	4348.68
1554170_a_at	189.736	238.737	214.011	128.346	150.494	194.704	157.797	153.413	153.466	115.141	116.247	155.399	169.735	188.321	168.197	195.504	160.867	173.464	175.223	148.906	188.514	165.125	124.952
1554171_at	151.908	154.324	149.18	134.075	122.138	105.991	113.079	122.262	141.23	131.262	125.415	127.751	149.282	106.309	161.505	141.39	157.551	125.076	132.053	96.1299	111.134	126.998	115.061
1554172_a_at	64.8813	89.5723	70.1313	123.605	115.157	58.4547	61.8048	76.2864	31.6842	89.2025	69.9083	85.8513	76.9248	94.1826	83.0961	90.9437	71.5391	95.6568	73.3013	75.3932	97.8314	92.3136	128.18
1554173_at	6.37975	13.8712	16.2423	7.29604	9.02628	36.8934	11.3771	7.02613	11.8384	21.3727	17.2371	11.0801	7.41743	13.3952	7.37452	11.5144	12.6255	18.1057	16.396	8.57384	8.97935	18.5076	15.1437
1554175_at	27.693	69.59	65.7332	54.8952	74.8369	17.2126	61.9341	40.032	68.6437	44.5136	61.4202	38.0956	24.7301	54.4239	78.6446	68.4958	42.3709	66.4334	53.2151	49.7739	57.4493	56.1766	48.0544
1554176_a_at	155.007	219.85	198.911	101.539	139.086	153.199	124.951	114.037	152.811	135.736	125.673	161.219	158.784	134.065	136.695	128.129	139.109	148.567	124.182	99.8368	127.447	119.69	105.407
1554177_a_at	298.388	449.105	416.725	280.879	320	191.579	284.894	227.43	265.915	274.957	291.939	324.238	279.913	231.658	293.235	193.032	207.117	349.072	332.158	342.551	462.247	324.192	358.073
1554178_a_at	683.462	835.435	709.297	533.477	456.817	602.039	838.009	803.784	992.334	528.828	497.483	547.582	741.346	831.241	791.593	614.603	543.093	632.055	947.888	887.582	965.717	645.699	409.688
1554179_s_at	88.6493	91.6439	58.3429	99.4985	97.7012	97.6762	87.2436	53.1274	84.2847	196.467	191.46	237.884	36.7417	15.6367	89.9074	113.819	66.5809	92.0192	42.2534	25.8058	96.8563	117.908	106.508
1554181_at	8.07298	28.8868	5.57448	7.33067	4.4493	11.4362	7.84478	4.27704	8.05275	4.74573	6.39515	8.31764	8.41596	6.16708	8.24585	2.61068	5.67645	9.44451	20.8223	4.54388	4.90309	9.79305	5.85351
1554182_at	53.7299	57.402	51.7065	73.3483	81.0959	48.0275	59.242	58.0042	59.6948	61.0113	37.0991	72.4343	63.4746	54.2669	61.1429	42.786	61.6355	77.753	35.1612	68.988	59.4148	58.892	55.2082
1554183_s_at	13.3737	19.7103	31.2727	17.2057	37.7356	19.3998	62.784	14.1618	38.8827	4.75487	17.1409	15.3398	14.2675	9.31157	27.5625	7.82455	41.1451	8.24341	44.388	77.4195	61.8233	6.374	15.2257
1554185_at	14.4816	25.7704	22.2339	27.4875	37.939	24.0729	29.1569	31.5117	18.0654	15.6722	27.9927	24.8912	35.8145	36.8438	44.4918	29.6674	46.1332	49.428	30.0859	33.2944	27.7558	29.3524	32.3081
1554187_at	8.83209	60.3239	10.0204	2.03835	4.64746	9.6247	8.16246	19.9568	50.3608	32.4016	10.6279	17.1424	8.63835	9.18345	9.83967	8.06822	9.34112	9.47067	7.28006	9.66908	9.77159	5.75747	22.3091
1554188_at	19.1679	91.6479	66.5059	24.4466	65.1962	39.7159	29.755	21.7769	93.7982	57.7341	13.2921	45.22	47.3136	52.868	17.3876	14.6331	55.2553	19.7058	19.6604	9.07248	16.2895	29.4298	14.8301
1554190_s_at	2.27955	0.897422	12.6712	32.6412	1.97891	17.106	21.6428	12.262	2.27527	6.44365	7.31327	33.5713	2.06794	28.2508	23.3272	2.74592	8.56012	14.8519	3.86293	13.2575	1.30718	16.135	3.02394
1554192_s_at	133.625	242.004	109.184	132.473	149.628	160.569	99.5907	152.355	121.466	160.173	175.733	147.043	166.646	153.14	131.927	206.289	115.539	194.937	152.824	129.148	202.848	184.877	163.044
1554193_s_at	107.373	53.3391	69.9811	79.5352	65.4617	71.1168	66.6855	43.5703	68.4045	51.1706	95.5218	62.0748	80.0016	121.393	109.979	86.6252	79.3741	77.4731	72.2583	78.2573	63.8942	88.5333	67.1645
1554194_at	2.1611	5.07518	1.64234	5.548	17.4079	2.35256	4.29592	2.3279	16.0162	11.6897	3.79599	4.28332	4.37043	17.594	8.91083	5.91366	3.15511	9.20535	1.45606	1.999	3.58538	4.50133	7.22141
1554195_a_at	108.022	147.743	157.446	130.405	169.287	110.519	149.792	128.96	131.891	123.929	103.765	126.384	114.867	111.079	116.204	143.324	132.197	109.781	161.784	146.361	114.516	143.918	123.998
1554196_at	5.63184	3.26012	12.7842	19.517	7.14653	3.94489	19.371	18.9653	13.4633	13.0156	4.42207	1.00423	43.0699	1.37549	2.70758	10.6995	11.2786	7.71342	11.8864	31.8389	1.88951	4.33077	1.28645
1554198_at	9.84519	14.2759	4.04756	38.9202	9.29087	8.83195	10.7004	11.3396	3.79365	24.1725	3.60326	14.1676	11.8109	9.56361	12.2017	11.9848	5.563	40.7033	19.5238	3.15182	11.5139	9.18443	14.052
1554199_at	113.592	123.99	57.2605	110.369	124.067	132.153	92.5039	82.3596	93.2564	216.28	176.949	235.081	103.77	97.1955	101.694	88.583	74.7727	73.6847	91.0803	94.42	98.5129	92.7526	115.252
1554201_at	51.7745	40.3447	66.0153	36.2315	41.5974	66.8339	58.857	37.229	59.2025	111.86	82.4477	57.3408	63.2062	78.3358	79.976	43.3735	59.0494	80.3293	41.1754	55.7118	75.4034	70.3791	77.8272
1554202_x_at	101.603	125.48	95.0342	62.4022	65.5805	91.0188	33.9049	53.5012	106.99	115.858	54.2526	95.8916	89.2585	66.1815	116.366	66.3142	96.6046	75.4047	115.447	60.2215	97.903	117.681	56.5099
1554203_at	1.79661	33.2983	27.1437	4.4438	13.5746	32.6728	22.686	5.33036	11.1891	36.6823	20.0508	12.6068	24.5882	21.7339	2.25	43.4096	26.328	37.4106	11.1224	41.698	44.2704	23.4474	5.26364
1554205_s_at	83.1103	86.5168	71.3462	96.049	54.7079	68.8607	76.3621	83.7847	59.242	89.823	99.328	90.2916	97.2764	57.6249	62.3706	77.6204	81.2367	106.194	109.431	50.2944	80.9906	65.943	103.438
1554206_at	146.198	201.439	185.728	213.356	199.88	150.471	162.291	136.015	189.953	167.173	186.914	186.066	211.697	161.662	180.733	144.876	192.295	175.989	182.085	194.103	130.538	272.43	141.648
1554208_at	51.0258	22.624	10.138	61.9883	19.345	34.1086	4.65593	4.08791	50.636	21.1865	17.523	33.084	11.9764	6.28963	22.1456	21.4147	46.0181	4.98813	50.2122	17.0702	6.68515	48.8152	18.7021
1554210_at	6.78957	6.94457	14.1427	5.50445	4.52862	7.14831	5.13593	1.55818	2.32793	3.18037	7.96054	6.87785	19.4751	22.7796	14.2155	8.48848	6.16512	2.72032	4.34853	10.1795	3.04761	10.0528	3.46321
1554212_s_at	27.6784	41.7984	29.7811	18.5352	11.1145	33.394	33.9632	52.0269	22.1899	24.9513	10.0595	19.9079	36.8687	35.8048	78.2573	11.9618	36.5973	13.7656	60.8795	52.0815	37.8373	55.7228	42.773
1554213_at	255.895	208.201	314.45	209.93	156.66	276.485	235.46	308.631	263.918	263.777	207.059	293.99	269.983	253.392	238.023	231.298	234.134	151.591	227.768	208.581	324.12	247.742	180.963
1554214_at	2.64023	28.2324	21.348	9.87171	33.8312	8.13237	16.5599	2.50173	26.0304	31.6482	2.86735	5.48753	3.48551	3.49936	15.4212	2.89485	4.60287	3.36099	3.75189	2.97964	3.09487	2.29422	1.86237
1554216_at	48.947	37.6379	54.1191	37.9686	47.7863	15.4538	23.62	27.3384	32.4079	46.0892	5.21625	27.105	20.4492	32.3164	10.0206	55.774	35.9391	26.8785	14.6739	14.1358	23.3137	31.9131	30.7191
1554217_a_at	169.142	143.979	175.852	115.78	148.627	111.038	131.953	135.121	99.0522	124.134	118.962	138.381	106.639	125.935	88.8729	155.493	150.811	121.782	118.56	121.682	158.414	165.387	112.485
1554219_at	74.3719	81.3515	3.7445	92.9328	60.427	82.5094	65.0514	68.4048	75.9405	107.749	38.846	88.8565	59.5811	41.8774	39.8597	36.7914	55.3936	67.3233	52.1499	30.2749	113.777	60.1072	97.4777
1554220_a_at	8.50381	53.4656	52.7064	53.9604	79.7933	10.4286	56.6869	46.9101	61.5896	66.4628	75.3451	106.519	73.3034	48.5563	33.8186	49.669	72.1188	59.1904	49.0965	48.6273	48.732	61.0477	50.4473
1554222_at	9.47572	5.1532	10.371	7.98402	5.05798	3.60268	25.2314	21.2597	3.13408	13.9194	4.38022	9.5258	5.12132	2.82901	6.50358	4.74974	5.61273	16.9659	11.4097	5.62522	18.0712	4.97982	13.937
1554224_at	8.21847	4.29521	9.23479	17.9229	3.34459	2.61421	17.6036	2.1173	5.75638	4.3277	1.45894	11.506	2.57005	6.061	7.04832	4.11234	2.80876	3.15526	6.93418	6.58601	5.11191	4.04388	3.64415
1554225_a_at	9.24747	4.28977	20.0682	32.4965	13.6972	12.5986	30.5397	4.3682	22.3756	3.33581	4.71583	3.71551	5.28701	15.9361	18.7624	9.43304	5.52978	13.5609	13.5477	17.1415	22.4045	4.74649	4.09887
1554228_a_at	13.555	37.2923	6.13642	6.21454	13.116	8.53482	5.74996	3.91929	27.6754	4.16473	6.11373	6.08473	24.2549	16.7351	12.7344	7.41149	10.4849	24.6413	52.0358	4.48594	6.93975	7.99775	43.4404
1554229_at	17.4762	36.9657	12.1779	54.2084	53.9749	52.429	22.4548	28.3583	28.8372	107.461	74.055	45.235	59.7986	38.2578	29.7664	72.9877	96.9712	78.793	38.7018	65.2108	44.9612	65.7017	91.191
1554231_a_at	51.0146	8.04982	33.5465	14.5981	40.0665	8.94024	9.73727	10.3764	50.7476	9.31069	10.7259	8.31606	41.7157	35.3573	53.089	15.1179	6.55729	17.2243	40.9223	53.9248	14.8538	6.09818	15.127
1554232_a_at	34.6837	34.1803	29.5725	34.3395	40.866	35.4744	26.3393	27.3728	32.5238	49.1192	19.2259	39.9499	43.1717	25.618	10.1521	27.9679	19.4138	20.7529	25.353	30.3738	18.8604	40.0319	6.71465
1554233_at	25.0217	25.1083	37.0986	19.7956	20.3865	19.0336	30.9573	16.6562	21.8597	29.5192	18.9636	32.1718	22.2204	26.3831	24.2763	37.8843	27.2238	48.2946	31.9418	39.6737	34.1212	27.0844	17.6716
1554234_at	39.5831	12.6347	4.92762	8.09949	29.1328	23.7276	26.0829	16.2947	30.8284	27.0253	27.8506	9.21791	26.7127	28.248	5.04001	27.7309	35.0039	36.7757	11.5656	5.19326	29.546	28.0388	16.4755
1554235_at	1.55441	2.04579	2.64149	2.03018	1.67337	1.69498	0.954721	2.33954	1.28168	2.75715	1.25884	1.53216	2.97694	2.39381	1.27533	1.13233	1.66181	1.30261	1.64551	1.71392	1.6057	2.12845	3.07652
1554237_at	196.532	233.159	179.537	181.43	188.215	176.89	162.91	158.229	161.617	311.013	291.426	330.47	199.093	125.715	175.817	146.305	153.824	206.108	156.701	133.414	138.745	141.125	138.518
1554239_s_at	431.038	538.544	568.866	662.469	646.701	713.955	404.11	394.066	400.491	558.871	495.272	609.134	548.592	625.016	529.732	783.698	851.337	909.095	458.582	507.378	463.274	779.515	860.711
1554240_a_at	3.53851	30.7374	7.43015	6.345	9.59946	5.41045	15.1282	15.7087	35.8587	5.05703	4.81786	4.61841	25.8088	25.9879	32.614	29.4676	7.04371	32.7058	8.03918	5.34451	38.2588	16.5614	6.32952
1554241_at	317.728	287.653	393.162	339.771	357.792	308.637	349.273	337.626	428.72	486.846	480.24	509.586	301.271	311.378	275.515	338.956	350.683	337.045	400.939	285.759	459.881	319.67	405.166
1554242_a_at	16.4031	41.0725	40.9234	33.5212	9.47384	38.0711	2.05992	34.0866	6.46221	38.6096	8.41256	26.2537	31.3023	4.32134	11.9645	1.70276	4.66573	6.46488	7.91826	4.46041	22.4867	2.02599	14.8176
1554245_x_at	276.272	298.249	242.8	241.519	246.452	290.253	239.348	265.179	254.476	262.544	233.541	247.987	241.233	244.266	243.067	245.097	283.512	271.513	264.935	282.049	244.898	276.939	330.323
1554246_at	43.7148	29.9434	69.943	79.6677	118.58	146.533	11.4309	15.6938	50.9858	105.417	84.7384	57.0036	39.0729	60.2544	53.4269	92.0227	130.278	111.34	20.9168	53.8901	58.0123	120.869	101.024
1554248_at	144.641	124.851	156.551	133.478	127.328	93.7128	143.7	157.679	107.843	137.606	168.073	226.126	152.279	144.812	102.203	109.117	113.772	153.735	136.758	163.056	210.567	127.704	130.49
1554249_a_at	455.369	254.235	417.284	310.549	327.996	305.266	413.027	366.578	419.337	361.814	370.193	331.229	305.243	368.188	272.77	397.774	276.47	234.935	406.648	317.012	327.527	298.009	191.076
1554250_s_at	318.302	297.873	285.429	262.67	253.008	257.582	265.49	271.393	285.08	175.671	259.987	203.96	241.02	307.191	230.527	332.29	336.082	329.915	294.953	316.488	334.255	324.892	262.337
1554251_at	753.191	637.537	712.232	480.33	486.792	506.607	676.973	688.479	599.503	497.246	539.566	412.058	631.323	576.9	759.873	438.923	427.462	430.429	609.248	674.165	514.921	345.05	376.59
1554252_a_at	20.3918	14.349	7.87319	22.8026	31.293	14.5309	29.2717	1.92267	29.2154	9.18669	15.7085	17.7774	2.85958	1.73062	21.5544	8.37784	46.6147	11.0344	4.08437	15.8809	3.05315	3.35361	19.8033
1554253_a_at	53.2409	79.9612	98.299	15.7358	35.07	78.0677	35.6385	12.0945	55.8915	12.2293	89.963	62.6105	60.2071	6.48064	61.0036	47.4662	79.0732	93.2857	15.037	10.4132	15.3638	103.544	90.8235
1554256_a_at	309.156	282.996	245.836	219.374	250.916	185.012	271.209	268.806	278.167	239.187	255.44	275.146	314.313	313.478	298.409	245.139	201.394	201.799	244.686	258.136	325.621	235.51	235.975
1554258_a_at	47.3083	38.9919	41.1878	28.0877	18.9523	45.0902	42.9391	6.08853	18.7876	43.0808	33.4098	7.40613	15.6186	9.7984	53.9955	42.7296	44	9.1997	32.0368	17.2069	23.8722	25.8148	29.3724
1554259_at	12.9677	5.38599	19.6078	11.5616	14.1594	12.4435	28.152	25.1569	37.7547	16.1481	19.3156	64.7217	10.9391	13.1301	10.5333	4.91305	16.1025	30.8568	62.7309	9.96758	15.8909	15.6507	15.3701
1554260_a_at	169.791	209.553	221.744	446.341	327.674	339.093	187.986	195.218	197.964	320.934	332.685	293.358	257.094	252.024	284.348	379.757	425.482	340.94	229.373	177.323	267.076	510.339	400.166
1554261_at	21.1323	26.0199	16.706	6.64778	11.4612	45.929	12.554	23.3616	35.4447	29.9137	39.2443	38.3402	12.6441	26.9617	15.1715	25.0172	21.0928	49.825	21.7819	28.8759	31.3638	33.2879	18.1981
1554262_s_at	59.8234	70.1002	64.5397	71.1789	79.7321	54.9303	57.7617	52.474	47.4431	30.996	59.064	71.3595	81.6679	96.1028	72.7337	66.1366	47.509	108.698	72.1852	52.326	87.8981	48.7855	115.28
1554264_at	229.29	245.852	230.842	149.938	249.573	202.312	164.671	173.268	211.514	239.191	255.185	259.448	204.074	223.814	188.246	307.012	313.908	263.779	139.745	173.299	183.79	210.165	196.918
1554266_at	66.6601	88.1899	73.184	86.899	109.362	84.1599	71.6038	55.7627	89.67	89.5184	75.1467	68.2279	75.05	69.83	71.348	99.2252	90.5052	86.7877	74.6776	70.4124	64.2297	80.0084	96.9254
1554268_at	37.957	40.5871	27.0633	20.9578	40.6845	17.607	47.6927	54.1261	28.0477	38.1382	24.8883	24.4446	35.5031	29.0201	26.2025	36.6049	39.7259	32.7143	24.1495	63.5755	40.6104	39.2139	41.8023
1554271_a_at	886.174	870.124	908.028	790.256	913.516	722.133	868.858	838.781	875.541	783.077	732.103	769.399	825.548	917.752	813.753	809.568	793.374	888.704	766.237	761.909	772.579	775.314	823.628
1554272_at	40.0905	6.00577	22.9618	25.4848	14.1962	24.2587	18.7375	24.6186	34.4407	26.1049	26.3514	49.5925	25.3274	16.3559	42.2456	29.568	21.8358	24.4878	8.34823	37.4777	29.6268	27.182	20.4522
1554273_a_at	18.2092	33.9806	55.533	60.6778	58.7897	28.2092	30.6714	41.8326	74.4996	20.8644	40.5421	16.2214	5.42582	44.2775	40.5662	5.82322	42.8847	32.4083	55.3402	28.8147	43.7051	66.2299	49.8785
1554274_a_at	74.3047	114.093	100.792	54.5471	41.7651	83.8553	111.916	107.109	110.42	98.5032	89.3686	113.159	116.19	94.5698	129.329	85.6182	82.7783	55.4143	105.937	94.6422	112.779	51.6667	78.0302
1554276_at	1.87189	7.28531	2.51676	7.50855	1.39712	14.8472	2.67818	25.1567	10.5431	5.08067	18.1827	18.1616	1.87827	2.17578	2.82296	2.55013	2.38685	2.77578	1.43566	5.60907	1.17321	2.29331	2.2659
1554277_s_at	154.138	63.1665	131.36	211.132	145.799	176.729	163.511	132.328	102.484	196.211	174.14	138.586	119.212	80.5348	95.6023	174.299	143.68	111.88	76.9382	86.0933	51.7101	139.831	119.352
1554279_a_at	149.876	167.598	118.048	161.687	145.256	122.818	98.2608	132.931	97.177	90.9978	80.8563	94.4337	144.596	153.635	96.1157	117.995	114.795	121.788	159.211	134.421	112.185	106.842	157.848
1554280_a_at	60.7686	48.1552	46.4019	28.5535	65.779	45.5844	73.3499	47.1631	51.6227	70.5536	83.8981	62.0077	42.0068	33.9754	47.5985	53.8411	56.4771	47.8586	43.0313	26.468	45.3101	56.4282	44.488
1554281_at	59.9702	59.2195	51.5731	43.7174	12.0515	57.8838	42.3174	40.7414	48.5334	88.2119	49.3204	46.9905	43.9888	39.498	37.1771	53.9187	9.91257	28.494	29.375	55.8404	33.275	50.5271	68.2229
1554283_at	207.246	213.762	199.289	129.201	141.216	125.782	243.211	225.36	314.565	151.554	154.498	146.008	295.662	247.974	244.902	163.791	165.871	133.465	450.718	273.964	291.405	218.993	166.555
1554285_at	30.9241	14.0235	12.7035	12.2782	43.3327	10.362	21.2245	12.4009	45.6288	9.18898	9.67421	60.2152	20.6811	7.52119	7.40449	6.03964	4.37983	8.21194	9.51113	45.7459	10.6744	20.3909	4.45199
1554286_at	82.0096	119.151	67.9855	68.1753	45.1317	88.7046	144.04	75.4456	56.2312	56.4302	98.0644	76.2501	62.9723	70.771	82.7896	60.1971	52.7731	76.2741	111.714	83.8147	90.9071	40.8403	73.2435
1554287_at	340.681	234.49	362.438	282.828	284.627	218.734	297.064	367.72	346.254	230.425	253.04	222.286	281.915	267.986	211.976	262.314	243.704	242.45	324.694	329.424	219.149	298.069	190.504
1554288_at	7.40075	8.27945	5.25473	4.60102	16.209	19.1812	7.68472	19.3467	6.30018	31.4008	5.43313	44.1127	6.92555	1.4008	11.4223	3.06325	2.63511	10.3979	3.22331	1.28695	5.5779	3.1031	4.79642
1554290_at	33.1592	39.6734	35.1401	28.7559	51.6587	53.3925	32.5402	30.3111	42.916	34.1412	34.3745	45.2628	20.6023	45.7761	42.0264	49.6948	51.5668	55.3292	39.3552	27.0368	53.9018	34.831	44.4476
1554291_at	68.4251	48.4388	57.0919	57.9772	62.244	50.0744	31.6074	57.8638	45.181	29.8971	18.3832	23.6981	51.703	29.8275	44.1843	40.5179	15.3647	3.56228	37.7102	59.3119	38.6449	37.6543	30.2597
1554292_a_at	83.8029	85.1934	70.9556	45.3877	48.95	58.8409	61.9712	62.7674	80.9543	61.231	56.8603	47.0841	104.862	65.5059	75.7906	59.8184	73.7017	57.3129	74.0445	49.5341	56.9261	46.4192	52.1216
1554293_at	22.4361	33.7549	51.2676	39.8248	45.0658	39.7382	27.3173	20.4725	34.3406	33.7597	31.0529	39.581	30.4888	24.3511	27.3911	49.7873	32.0144	40.3881	45.2013	20.199	26.3484	35.0203	42.2349
1554294_s_at	52.3915	46.5167	48.8935	39.3783	52.7109	65.4466	59.4895	41.2535	45.8563	56.3863	37.7029	79.8284	45.2788	50.4211	54.3858	57.9155	56.4589	67.8595	53.7411	51.736	47.7713	58.2444	50.2916
1554295_x_at	72.227	63.3309	51.7049	50.7597	70.5699	68.327	36.1129	63.2265	50.5381	60.7309	62.5092	51.2494	54.2814	49.8725	52.5073	26.8189	38.5339	39.1736	31.5385	67.3886	48.7994	36.5415	33.3908
1554296_at	20.3131	2.67376	3.49142	0.793273	13.5561	10.2969	20.5028	19.3686	2.98958	9.18428	3.25492	18.4311	3.75531	1.19418	12.0967	4.95137	8.28419	11.0459	3.07956	3.13855	3.43266	6.94933	3.0925
1554298_a_at	16.3506	2.98053	2.68137	14.3555	6.55335	5.55945	7.75775	16.0223	9.30221	7.30537	3.36578	4.86182	8.06113	9.00688	19.6611	13.711	4.70031	8.40578	7.37272	9.25803	9.27921	4.08861	4.78216
1554299_at	6.22948	6.98652	35.6568	18.8725	31.03	6.84002	10.3117	19.3983	34.5508	26.7423	11.2371	5.51962	6.60681	3.56171	32.0345	11.1822	7.13745	7.50406	6.17242	18.5261	34.2703	7.25312	16.9151
1554300_a_at	7.07337	24.5257	10.4665	25.4228	12.2961	13.9984	8.04493	27.9779	7.35291	26.6375	7.14787	5.62986	41.4521	2.49558	6.08726	5.12089	4.30193	6.11174	5.78966	2.58432	7.47006	8.72146	36.6692
1554301_at	10.7295	4.38494	11.0178	1.55095	2.19338	2.79545	3.47501	2.25307	1.35872	0.89755	1.92946	5.14628	2.17358	1.66106	1.56068	1.71508	4.61018	14.0594	2.59584	1.79279	3.87029	1.83493	1.8043
1554302_s_at	19.8008	12.4085	21.1437	25.1596	2.41108	7.48126	11.434	18.5306	13.0477	33.7251	20.5228	15.3757	16.0173	22.5923	36.1188	4.37413	6.05568	29.8308	30.0675	26.604	14.3086	25.174	20.4988
1554303_at	69.2398	65.3798	54.9	73.025	56.5806	70.6142	71.6171	53.8763	62.2531	78.0426	50.6864	66.775	52.9813	55.8435	52.6578	83.4657	51.1192	61.8723	46.4954	58.5351	46.1917	58.4656	69.6775
1554305_at	44.2677	58.9547	63.8439	6.61854	18.208	11.0278	40.5453	44.0046	29.6341	67.9651	5.64165	118.554	8.81841	77.3762	10.1828	46.6261	48.0644	73.2621	64.0724	76.4496	36.6254	62.3338	56.9784
1554306_at	148.01	120.704	102.199	125.522	103.802	74.614	135.014	167.659	151.822	122.414	138.491	133.547	90.4084	107.66	118.977	107.732	102.025	107.804	77.6477	112.145	51.6909	152.228	78.0518
1554307_at	22.1261	39.6387	10.1423	28.0592	26.4062	30.6882	18.3398	25.7985	18.6348	3.66749	37.899	30.7363	5.11062	41.7476	30.9213	14.0048	5.10476	16.8342	12.7884	11.8179	22.2152	10.9902	21.5794
1554308_s_at	61.946	43.0757	37.0556	50.0518	42.4404	22.8196	58.4421	57.9105	34.4451	40.7204	31.418	67.4046	6.89997	45.8242	19.4076	5.19138	30.171	24.3332	32.3861	7.02969	25.1301	24.6957	44.0868
1554309_at	60.9548	63.36	89.3047	46.8916	62.5929	59.3651	83.4383	61.6712	108.522	91.248	63.6853	83.0886	80.0264	67.9971	61.5683	53.8114	67.1989	39.6156	65.1939	33.0409	75.2959	58.2135	52.785
1554310_a_at	96.9434	40.4948	91.163	70.1204	27.2472	45.6772	67.8298	7.99339	91.195	92.872	31.398	70.2733	105.821	86.5719	45.4704	58.0728	50.0359	65.6663	23.6329	74.6769	103.639	98.6194	65.4333
1554311_a_at	41.6916	54.8896	36.3953	61.249	36.1583	39.1529	54.2473	44.6898	49.6478	21.7165	44.5776	47.1358	48.9629	80.4779	48.6185	37.2384	51.3034	46.8912	54.4941	61.2611	58.4455	52.337	57.3137
1554312_at	83.3909	138.172	105.072	84.4731	104.689	76.3158	91.026	85.3869	94.3195	138.288	85.7018	106.457	81.1458	80.835	95.7925	72.1241	96.0944	73.5082	78.3414	43.2367	100.556	86.4463	106.178
1554314_at	174.024	271.97	263.567	127.98	117.101	211.586	107.754	79.3155	205.95	96.0981	102.31	162.789	196.993	238.371	204.615	129.968	121.503	181.702	248.703	258.721	262.36	148.468	100.717
1554316_at	457.444	496.097	397.866	309.037	402.251	336.949	316.399	452.142	244.903	388.975	209.686	317.825	351.436	422.337	319.744	285.135	281.18	281.112	420.834	463.259	381.616	351.032	311.265
1554317_s_at	353.973	374.078	286.732	313.716	275.23	336.748	329.503	318.485	316.77	313.077	255.81	267.625	306.054	278.724	319.597	285.667	343.153	307.029	314.659	239.728	407.867	271.769	324.78
1554318_at	56.6197	54.0949	43.0552	44.9042	54.0092	49.5967	58.9263	61.11	50.4806	44.2477	60.3955	52.6407	16.4413	42.0828	50.5255	35.6361	27.5105	53.1859	27.3317	19.9651	43.6597	4.6509	18.5624
1554319_at	27.591	30.5861	21.2302	19.5048	13.3423	1.6167	26.0048	15.3372	32.4441	16.8234	7.83464	25.545	11.0239	14.0604	33.8825	20.9839	17.4139	1.8285	25.246	4.33567	26.3936	23.4634	1.59689
1554321_a_at	215.204	178.363	277.706	312.334	320.879	363.139	228.133	170.276	229.692	309.588	298.764	242.223	333.371	179.736	218.759	309.116	371.746	311.007	282.633	249.465	252.766	311.222	287.468
1554322_a_at	48.9411	11.7392	23.3062	10.208	9.1408	11.3208	45.9674	18.447	54.5393	88.3195	64.7015	75.8089	46.7491	8.11514	5.97501	56.8139	26.9588	50.5153	12.5281	10.3739	30.284	37.0185	21.9271
1554324_s_at	96.108	116.296	94.9172	113.22	86.5097	100.901	72.6623	64.4598	100.088	78.0928	92.71	117.683	75.5288	114.686	97.5569	92.1948	94.1833	84.5314	56.9787	91.5233	65.4814	119.706	57.044
1554325_at	36.4009	16.1681	7.37823	16.2009	25.3272	29.2385	17.2319	62.5606	38.6749	34.2555	14.3154	45.1679	17.3892	34.3437	21.3919	24.1177	32.7866	20.4945	25.2695	2.77111	19.8062	42.0122	22.8697
1554327_a_at	81.3734	65.924	123.598	102.039	103.156	115.731	137.111	183.071	149.619	152.564	141.284	185.02	118.551	99.9687	63.1742	105.728	129.894	101.493	80.8727	112.364	99.9165	136.815	107.843
1554328_at	47.4287	32.5993	32.1355	58.2143	36.2223	57.1229	47.0978	31.4039	58.4972	38.5567	23.5095	43.4243	28.416	35.2419	37.2629	31.718	54.6669	18.6957	25.509	23.4399	25.2026	20.7745	40.727
1554329_x_at	40.2064	47.1238	50.9167	39.8599	29.8462	49.3605	50.0021	51.2583	39.9282	54.4961	36.1858	68.0363	31.6671	31.0486	40.6809	28.4325	37.7045	48.8096	38.2886	30.1592	29.6363	35.8843	41.9198
1554331_a_at	8.55992	41.7892	37.383	37.423	35.7477	35.0183	21.5447	33.076	8.17689	48.073	36.8713	37.0343	16.785	47.1283	7.16769	25.2999	42.9836	39.695	39.7161	65.5681	37.5248	22.6111	12.0347
1554332_a_at	42.5087	71.2616	66.9725	54.919	24.034	5.47866	41.1235	60.4137	43.0094	43.9273	34.3148	39.8324	49.3984	29.5034	62.5889	20.7797	40.8249	19.4769	24.0433	6.72366	48.2946	21.5698	5.87105
1554333_at	13.8167	18.0921	33.6212	15.3069	18.7187	15.2517	20.1667	34.124	7.21097	17.8433	5.88865	9.25807	2.14494	2.68201	15.953	18.8142	20.1017	9.17837	21.794	22.6315	12.8134	25.1497	27.6346
1554334_a_at	27.4615	35.2332	64.9174	4.24907	37.452	48.3434	17.5483	35.3423	42.6358	12.9274	49.8373	56.8622	36.7959	32.8028	22.5158	10.9314	22.4421	20.3104	42.6531	51.7346	39.0159	27.7349	35.7056
1554335_at	3.82251	8.75236	4.86549	11.469	11.7766	4.58064	3.85401	6.01372	4.13969	44.2618	14.2787	16.7336	5.22632	10.3924	8.40437	5.25201	10.2533	8.12847	10.2336	2.79277	13.1594	7.17334	5.58148
1554337_at	5.19273	4.13343	4.52414	3.7959	2.52475	15.4694	3.05425	2.88406	3.03552	5.19389	10.179	3.3485	2.6422	2.48686	5.42481	23.2165	3.05212	6.36559	5.52381	4.07468	3.45266	17.5394	6.08541
1554339_a_at	89.0508	45.843	51.2195	49.814	36.6715	49.6224	87.5099	67.1384	76.6823	52.7092	46.1166	64.0208	60.3438	58.71	56.653	51.2902	41.8804	46.0229	74.4074	67.9526	66.3783	51.9203	56.0872
1554340_a_at	24.9548	45.7999	32.8909	4.02671	20.9114	25.7556	34.0169	24.2843	45.4118	34.2837	19.7189	21.8265	28.313	6.81214	8.89687	24.7649	36.6888	15.9696	4.36052	23.3269	47.0288	7.58381	24.3033
1554341_a_at	223.463	254.538	257.369	256.562	216.598	232.89	280.87	261.114	236.572	236.138	246.132	193.386	238.35	295.32	304.238	291.145	277.723	271.487	278.859	385.99	284.914	231.098	268.203
1554342_s_at	323.939	267.665	272.333	262.122	249.621	296.031	292.933	258.038	313.539	277.766	267.085	272.927	360.609	362.98	356.066	332.964	294.002	330.672	356.216	409.05	319.547	345.802	294.725
1554343_a_at	23.2074	26.3334	23.7101	17.4943	53.1089	16.826	36.594	15.3615	38.1707	8.29135	27.8552	37.5826	21.7237	27.9845	21.2447	11.1506	26.3905	27.8475	34.3661	44.2122	32.3136	18.4794	23.9003
1554344_s_at	152.898	297.699	267.102	204.726	264.259	223.347	219.265	210.32	262.221	236.974	196.259	318.969	148.759	280.758	285.86	201.348	261.648	360.61	229.244	209.37	239.132	279.33	328.756
1554345_a_at	628.4	463.912	514.353	645.006	596.189	585.092	477.1	548.209	545.368	561.783	557.624	615.986	477.4	533.255	547.362	663.453	640.018	570.771	491.327	597.494	541.491	539.724	544.402
1554346_at	73.2193	129.307	120.548	110.239	96.9435	118.062	70.0051	61.0674	68.2174	89.0418	114.702	147.371	114.368	105.593	102.456	165.135	157.336	120.606	92.3165	85.2177	100.254	131.819	156.354
1554348_s_at	208.398	182.681	208.224	240.449	205.505	229.725	166.966	170.427	246.254	157.946	229.841	252.815	161.075	189.861	214.54	193.652	257.999	237.594	167.743	254.867	144.922	213.009	185.773
1554349_at	45.6656	66.5337	24.6238	50.9121	12.3787	53.3773	31.3036	41.2735	23.7362	47.9411	32.634	58.8069	16.1945	37.7699	46.1222	28.1341	45.1225	30.0855	20.4342	3.81622	33.8782	46.6361	25.945
1554351_a_at	2822.05	2249.73	2918.77	2844.75	2642.48	3266.3	2623.75	2802.81	2646.87	3563.65	3450.3	3157.12	3305.37	3165.36	3224.07	3348.8	3534.18	3221.33	3116.31	3379.03	3203.5	3399.29	3312.56
1554352_s_at	254.121	367.487	255.627	396.429	419.64	395.165	307.094	299.8	316.625	383.623	398.286	372.868	390.959	279.291	237.558	322.452	395.321	375.933	254.824	188.422	348.176	353.639	387.85
1554354_at	39.4315	24.0463	40.1292	18.9969	25.9339	18.0079	25.0135	18.1897	38.8288	12.1172	24.4	26.1444	30.2931	31.7686	42.56	23.383	24.6608	15.1562	16.6312	25.1335	40.041	37.2576	22.4751
1554355_a_at	14.1722	43.1712	55.6029	27.0519	35.6255	49.8716	30.4807	24.5191	12.681	34.9703	27.9035	41.236	36.687	39.144	21.6689	30.633	31.9461	43.4606	35.8493	57.3549	34.5098	28.1279	17.0572
1554356_at	148.137	132.036	138.751	157.728	149.752	124.844	122.328	142.221	126.765	141.099	60.5525	128.865	112.788	92.7691	119.395	126.71	168.563	132.206	102.086	93.2148	109.145	155.278	104.376
1554360_at	111.869	117.912	95.073	119.118	95.4167	107.993	113.982	125.28	88.6977	90.9954	81.3952	115.708	147.197	89.9247	102.148	101.249	103.216	102.481	108.703	107.448	152.609	94.1721	45.9532
1554362_at	13.9971	3.42369	4.5958	8.33912	7.00149	19.3087	27.377	34.8616	26.4826	14.4197	41.4235	5.94931	29.2762	33.8213	22.3461	18.1535	5.43773	8.01105	26.608	10.2209	33.0609	4.17166	4.90058
1554364_at	68.6266	35.3787	59.9708	79.4964	63.3872	72.803	49.5938	39.5157	66.6956	79.7349	81.8448	103.274	58.8709	42.2214	48.5409	63.5741	66.5795	122.903	53.1533	12.2772	46.3046	92.6987	72.3506
1554365_a_at	1685.6	1517.57	1804.76	2098.79	2153.75	2407.73	1745.28	1650.49	1728.42	2725.13	2703.6	2832.27	1900.85	1875.26	1770.43	2351.66	2320.15	2247.84	1631.85	1671.48	2049.44	2419.31	2223.16
1554367_at	41.0964	71.3687	55.9796	35.723	87.8981	47.3149	46.1389	40.1445	43.0599	49.715	28.767	97.0229	39.2014	44.6743	57.2942	38.9782	35.1038	73.8985	55.3007	56.124	47.7121	31.0796	62.4368
1554368_at	2.50667	19.3191	1.00412	7.37184	0.650276	0.984822	1.49745	18.8881	2.06462	2.47267	4.76351	21.6365	11.5917	7.78528	1.98823	19.0934	16.0643	8.06146	1.79815	4.51152	2.60547	0.496646	0.699808
1554371_at	35.0096	55.6527	34.1984	17.3897	39.6829	24.2596	44.7585	23.5944	30.0114	58.3764	32.0584	17.0004	27.7488	56.847	31.1016	36.0288	45.3373	58.1686	39.2321	27.4926	39.7647	42.0106	25.5387
1554372_at	46.4623	77.9077	46.4241	59.1965	39.5244	42.3158	86.7414	48.9442	51.7382	51.9302	70.0779	44.5761	49.0931	56.815	47.4081	65.217	56.46	86.2382	67.3463	67.3772	72.7686	53.0838	51.1111
1554374_at	26.3617	33.5764	8.69663	30.3189	31.1107	29.5012	27.3624	38.466	72.7728	38.4011	5.39973	15.7604	43.7896	8.46328	40.6369	37.5962	35.1871	44.7801	37.6621	32.4377	9.76406	32.539	37.8201
1554375_a_at	25.8057	36.5203	10.2053	35.5677	33.2312	2.96223	34.6627	6.82663	6.90478	5.36488	10.3377	24.407	23.7332	23.7934	29.4814	8.47161	11.7647	19.5374	33.4799	31.0593	6.54331	12.5732	29.7281
1554376_s_at	62.3933	89.6221	89.8751	63.9646	57.9382	69.1579	57.6045	50.7286	60.44	100.681	49.0522	58.3292	81.3742	64.6598	55.2535	76.0915	119.729	60.0113	117.311	73.3066	94.1905	81.2712	88.3045
1554377_a_at	4.14688	14.4254	8.27703	15.9698	5.18141	26.7291	12.8511	11.8784	6.59248	6.44196	6.76635	14.1613	29.6526	2.70505	55.1437	27.6721	15.2042	41.6327	4.92634	19.0473	7.08062	3.83526	20.8473
1554378_a_at	18.3602	7.13865	6.35721	2.24448	7.28468	2.18897	6.75599	31.8582	2.22046	4.09153	5.03365	5.87436	8.16293	31.4044	19.3589	2.7447	1.57696	15.9092	5.35183	7.4093	16.2955	4.34192	14.6278
1554379_a_at	6.95539	15.6686	3.31734	13.5127	2.57848	13.6748	16.1448	10.3157	12.7514	11.6959	4.94289	4.84292	15.1436	14.9193	11.2456	42.4333	14.1517	28.9766	7.06666	11.5121	16.8689	8.02118	7.25269
1554380_at	46.8364	77.4142	24.958	30.8823	94.2956	91.9604	52.4628	38.9545	70.0557	28.638	66.3886	55.8674	48.3069	54.8162	44.4251	34.8498	118.854	80.839	43.0064	98.8374	35.6521	100.13	78.1046
1554382_at	46.3375	32.2687	27.6515	40.9342	61.863	42.347	14.1941	4.80104	45.281	45.4633	46.4812	47.8563	4.71175	49.1988	44.8438	41.6218	20.2944	30.0435	22.5783	73.757	4.96567	39.5524	8.72035
1554383_a_at	3.49022	17.2371	9.6748	16.7962	10.9736	14.5278	5.39813	9.51975	15.2193	11.8332	11.0999	8.87891	11.4759	25.5617	8.76185	4.10072	9.93823	10.9164	13.5847	30.7535	22.0901	34.8313	10.6996
1554384_at	21.8073	18.6274	18.3509	32.2456	29.6641	19.0895	23.6768	17.9217	23.6093	24.9108	25.826	36.268	26.0619	21.35	28.4764	30.5651	56.6301	33.2218	26.2547	28.6554	23.5995	53.1619	38.6411
1554385_a_at	86.6261	113.948	114.617	100.286	88.7363	56.5918	78.7073	59.2996	114.673	107.146	113.528	84.2018	80.2165	58.9692	105.766	81.6592	99.3353	72.8932	82.0916	67.5801	125.5	108.903	97.7088
1554386_at	2.66015	7.7002	3.06496	2.56754	14.1692	9.52493	3.12281	5.00442	4.9953	5.26239	2.53064	2.59305	6.66407	5.58736	3.07359	8.70307	35.0003	5.28539	3.78923	8.31086	2.04059	4.44374	4.0197
1554388_at	127.083	177.765	158.688	113.916	131.571	140.689	185.762	208.422	117.956	172.658	117.597	147.262	173.539	96.3493	152.461	147.106	162.003	101.639	199.175	195.644	163.07	145.739	156.412
1554390_s_at	794.954	605.675	638.701	698.114	646.79	574.083	720.26	827.66	664.111	694.714	692.627	563.098	866.216	779.607	905.624	763.694	816.388	678.929	920.642	1029.83	808.549	917.512	824.559
1554391_at	37.5757	71.624	122.187	113.34	115.715	131.354	68.1072	85.7523	88.9527	98.179	93.1852	81.1439	89.5817	94.6555	99.3973	84.6277	114.802	96.1262	89.7404	69.4072	106.592	90.8197	59.5453
1554393_a_at	54.9936	63.5686	91.6014	60.1705	57.2675	82.5421	66.8722	62.6225	82.3534	83.8559	77.3814	113.688	60.5415	80.8658	45.1115	58.7016	110.875	85.9391	31.6238	44.3847	73.3334	51.7546	98.9463
1554394_at	11.3519	21.9449	25.4865	22.1881	26.9173	30.6285	10.9272	3.03208	27.9326	7.11201	27.8625	36.0785	11.361	30.2875	38.594	16.5346	27.6203	4.73313	11.6919	11.8235	42.8014	20.583	21.6033
1554396_at	105.281	171.139	141.89	172.889	126.089	142.545	115.747	149.142	137.827	176.533	75.7851	113.35	84.0118	118.713	154.788	178.655	175.576	179.854	137.901	77.6483	168.578	146.549	153.418
1554397_s_at	565.674	416	590.329	644.214	629.844	615.625	577.462	573.965	479.504	615.723	632.991	573.728	616.835	604.489	470.549	769.567	789.765	717.101	526.96	663.002	611.826	793.465	830.4
1554398_at	5.96798	7.22984	27.25	5.62675	7.71318	2.56118	8.04801	13.0213	36.1206	32.2889	5.99087	42.0241	14.0377	38.0553	8.46605	11.882	23.0664	37.4142	24.6058	2.08938	27.3613	15.2289	38.8539
1554400_at	2.83694	2.82674	16.9444	5.1771	7.93262	7.82359	32.9997	1.44828	14.9054	3.64257	1.45638	2.9319	0.892857	5.71147	21.0727	18.3968	11.2207	7.16997	13.8685	13.672	9.97949	18.5354	15.9294
1554401_a_at	1.40118	4.47533	6.62721	20.9675	3.06015	5.40858	23.3552	4.46962	5.16498	4.46055	2.75627	4.08435	3.966	3.19554	4.21804	5.72175	4.12786	7.26043	2.201	12.9048	4.53264	4.29395	4.3238
1554403_a_at	2.19809	8.95958	4.39369	2.66473	29.1506	3.75326	14.0432	2.90617	2.4863	2.69964	3.86968	4.74016	3.33488	3.24765	1.56116	3.5205	2.92833	17.9273	2.96283	2.362	5.12451	2.80261	3.58895
1554404_a_at	2.48207	3.92559	4.22575	4.00962	2.8604	3.75988	3.85256	2.57348	4.89466	3.13251	2.69779	6.56049	3.0965	2.30724	2.92748	2.12026	3.25798	3.58233	3.37203	3.36547	3.13745	2.68387	4.33275
1554405_a_at	45.2943	59.8583	69.8966	47.0364	81.5206	66.7373	61.1461	46.1194	63.8286	68.1581	53.9934	56.9176	57.2085	65.5368	55.5263	55.2529	48.9873	57.3236	29.9367	57.2965	60.4611	63.3526	114.715
1554406_a_at	78.0937	89.605	37.2856	41.1151	74.9187	12.67	61.04	64.6008	74.3372	79.0451	45.0448	60.2284	53.9864	119.89	77.6077	63.8425	58.6213	41.0973	83.961	53.3536	121.993	47.0049	8.59289
1554408_a_at	806.41	909.041	1025.89	1274.08	1201.09	1267.62	919.6	928.565	893.625	1100.29	1101.43	1101.93	938.174	801.05	863.52	1320.31	1390.26	1305.37	886.886	849.781	929.731	1146.06	1175.58
1554409_at	16.6353	27.5677	76.1563	72.9393	23.3948	51.2598	64.799	42.7661	42.268	37.2527	48.8392	40.4627	34.779	76.1918	44.4455	43.5039	58.8266	47.363	50.0143	58.8711	56.433	46.4878	44.3989
1554410_a_at	461.517	404.488	312.203	486.329	517.445	310.039	321.685	267.719	295.851	399.831	270.253	303.437	361.509	416.199	266.033	375.148	342.715	480.88	353.269	226.298	432.554	231.972	367.883
1554411_at	662.95	733.388	626.521	636.417	815.205	743.261	745.211	594.711	687.294	573.965	706.141	539.627	718.818	809.862	886.955	653.588	618.952	617.082	749.043	783.472	687.206	649.095	742.669
1554413_s_at	15.0792	1.98164	1.89828	15.8166	1.67753	1.63008	2.02417	1.63946	1.46439	14.1954	1.23257	1.42088	7.44951	3.07644	7.57946	21.1159	4.95139	10.4843	3.50414	3.64125	5.48182	2.03348	3.2921
1554414_a_at	627.191	733.479	685.867	584.645	583.079	620.069	715.286	674.592	603.604	545.079	475.826	466.273	787.115	785.61	781.6	705.701	701.757	655.664	897.882	811.485	887.312	610.6	795.05
1554415_at	916.808	888.522	758.853	688.154	570.688	612.548	938.766	945.491	877.073	537.01	631.87	553.181	918.344	896.899	912.877	663.628	582.679	599.428	981.73	998.775	902.104	638.042	584.921
1554417_s_at	601.187	428.678	648.946	694.05	669.495	758.006	562.28	834.71	691.848	936.005	775.461	735.533	947.214	819.06	504.263	862.88	938.175	936.873	796.9	845.975	792.495	951.858	1201.01
1554418_s_at	12.2163	15.0862	26.5094	24.6456	1.56412	3.75371	5.38289	18.9424	2.0028	6.62814	8.90577	15.7653	13.5063	10.2191	17.4497	23.7402	5.31883	17.0712	7.64617	20.3486	10.2256	30.7843	1.51902
1554419_x_at	20.7676	55.8359	12.0768	8.1	42.9906	91.1314	38.8461	34.5472	91.1823	7.1019	40.4411	55.8438	48.0042	7.17278	28.3126	47.0934	32.3408	53.7143	42.3339	48.5759	54.1224	9.80689	23.6349
1554420_at	9.47682	19.0015	11.5234	5.84917	10.9194	14.9754	15.449	31.4006	10.9757	22.9956	19.7039	52.6495	8.25345	71.3325	17.9377	11.5695	12.9856	30.0827	7.09951	16.0734	18.1807	10.5144	20.4859
1554423_a_at	2277.39	2333.95	2473.91	2736.65	2968.73	2721.92	2255.16	2604.45	2201.64	2641.75	2488.88	2754.35	2492.67	2593.75	2381.06	2745.43	2868.36	2828.42	2417.04	2400.12	2689.67	2979.2	3104.34
1554424_at	332.529	264.625	346.105	333.852	346.746	307.547	334.41	340.318	375.026	352.853	318.805	324.36	326.95	358.511	293.876	347.424	320.153	291.48	269.811	297.632	312.274	327.176	336.794
1554428_s_at	127.98	229.179	153.775	24.26	145.537	158.657	116.75	84.1179	122.405	171.356	174.347	122.142	83.6841	155.659	183.866	152.133	140.609	165.598	126.691	147.031	222.454	145.291	153.094
1554429_a_at	118.295	222.927	166.271	153.307	192.908	114.798	155.77	123.47	155.846	182.042	162.299	156.155	169.202	136.849	154.151	186.666	139.177	178.393	162.127	214.642	151.271	160.262	162.871
1554430_at	104.597	108.859	109.51	159.381	116.815	138.292	155.69	87.4323	55.7359	67.2593	105.279	172.234	26.8566	118.336	77.9287	136.346	206.633	233.939	27.2407	110.533	159.63	95.2097	133.476
1554432_x_at	248.791	473.155	332.085	312.176	405.887	272.824	306.325	241.277	264.522	368.734	262.847	372.824	314.911	275.366	456.101	260.354	352.215	462.372	238.033	344.763	432.556	341.392	261.382
1554433_a_at	1119.63	1108.02	1024.42	817.595	903.865	813.992	1138.7	1185.39	1152.55	774.881	836.23	719.972	1137.63	1153.94	1017.41	799.829	813.753	802.45	1142.96	1056.07	1063.77	803.064	786.781
1554436_a_at	26.6056	48.2737	34.2384	25.8971	31.1469	31.3699	45.1471	30.2343	42.8982	31.1902	34.7425	54.3014	47.9597	30.6673	19.4664	27.7525	27.9497	42.4446	33.2242	19.4069	26.7144	18.7775	24.9384
1554438_at	104.237	111.068	103.088	177.817	163.27	252.807	125.25	78.2328	148.496	216.86	270.029	254.648	88.9599	104.863	90.771	131.121	138.285	148.841	98.949	136.374	62.8533	149.158	130.249
1554440_at	21.2851	18.412	44.1873	31.057	5.19765	39.5002	19.5188	37.1886	36.5735	46.3852	24.7511	19.3654	32.8879	48.8822	36.8676	57.0002	33.7654	44.8391	15.2645	40.4372	31.1619	58.5316	58.6789
1554441_a_at	714.339	840.87	712.616	684.798	731.985	626.218	865.078	915.909	795.128	681.533	742.455	785.528	806.857	786.82	752.02	690.018	764.552	778.074	807.402	722.314	894.12	738.164	759.661
1554442_at	13.8719	8.45725	12.1713	37.2959	17.2489	13.5865	14.5097	9.92545	11.6932	13.1588	5.85972	15.4825	17.4957	11.8438	7.91451	10.6775	12.2027	21.5215	9.96854	14.6488	7.55569	17.5351	11.1648
1554443_s_at	38.3074	17.4802	33.9867	3.83043	12.1991	27.2393	2.59967	40.5559	30.6525	15.8587	29.7047	50.2383	21.6437	35.8707	21.6342	10.2133	9.54911	31.4199	29.5422	5.24645	7.41738	10.3896	25.5979
1554444_s_at	198.717	216.226	146.704	203.939	211.381	217.664	196.606	143.939	218.046	228.201	201.516	239.224	151.672	219.976	155.855	214.898	222.053	244.185	119.654	160.83	153.381	208.032	248.398
1554445_at	304.525	282.406	282.136	297.548	296.645	313.657	234.573	234.34	242.509	301.517	274.483	286.697	345.01	283.255	291.869	329.817	334.644	328.267	358.655	295.789	297.328	384.89	364.952
1554447_at	762.559	600.113	634.054	669.916	627.469	750.873	597.075	554.48	618.28	900.709	840.061	869.545	639.147	595.889	589.533	746.634	669.5	640.698	565.398	584.906	496.523	769.884	495.73
1554448_at	138.888	136.844	104.54	120.237	104.587	100.339	138.117	67.5024	79.8824	114.264	114.345	104.15	83.7865	116.399	145.301	94.2561	107.889	122.983	113.059	108.72	100.399	111.476	69.413
1554449_at	69.5846	129.375	116.169	82.5321	66.463	80.3823	78.6485	78.8668	130.488	75.1458	83.8157	81.2511	86.0188	80.6572	78.5152	42.8659	61.4737	94.3137	82.7536	64.4578	89.8171	57.9174	44.7532
1554450_s_at	442.11	510.632	392.74	370.533	293.239	393.464	409.161	344.529	407.656	326.754	344.678	353.013	444.094	464.983	402.68	345.089	337.535	399.436	388.034	295.792	439.891	355.378	345.72
1554451_s_at	311.096	341.658	298.762	299.856	347.583	315.237	331.584	337.483	277.827	393.993	326.91	347.326	309.625	346.673	294.413	299.157	317.749	313.872	328.525	247.999	303.805	300.858	324.553
1554452_a_at	642.875	650.746	763.399	739.267	913.623	597.456	727.995	878.066	685.944	503.986	475.816	409.404	745.229	677.526	616.001	642.892	669.457	599.299	619.023	781.919	620.082	518.668	550.591
1554453_at	82.8261	78.2799	64.324	134.39	107.939	89.6581	59.5702	76.0227	71.0871	88.769	96.5918	84.2079	104.27	120.908	96.9742	91.7508	78.1952	111.994	78.1608	85.7178	71.6539	87.8689	104.705
1554455_at	286.108	304.57	267.205	186.022	202.711	186.532	381.062	356.602	413.192	262.653	252.12	319.116	210.557	262.751	252.998	272.585	241.697	219.367	254.733	261.155	290.2	199.835	211.366
1554456_a_at	425.389	377.51	388.36	383.051	353.547	369.051	500.936	433.876	503.4	458.15	472.713	507.04	394.493	340.509	370.335	350.56	355.867	370.275	318.156	371.798	356.229	292.22	287.711
1554459_s_at	2.61369	3.99931	6.67671	7.86444	7.98913	34.8015	36.2465	7.26056	29.8548	6.51128	8.12479	9.50286	8.08962	8.50657	26.4093	29.4979	7.45473	8.20205	57.1303	4.45618	34.6969	7.19375	11.075
1554460_at	24.0589	56.5308	29.9951	25.4641	27.8832	27.8631	30.1166	32.3502	24.6786	34.3171	37.1465	40.6637	17.8968	35.2314	19.5255	27.9435	19.4802	50.4375	16.1809	31.4065	35.6398	40.0806	17.0719
1554462_a_at	1042.88	892.833	892.513	308.71	406.443	449.459	1026.87	1022.41	1250.86	550.844	454.791	578.685	866.13	980.117	847.687	594.414	509.137	450.526	1155.12	1141.26	1314.13	554.683	569.565
1554464_a_at	2376.05	2369.61	2607.55	3072.1	3156.62	2948.37	2294.25	2842.48	2254.42	3131.65	2748.3	3249.25	2725.8	2634.18	2348.25	2776.27	3014.8	2916.94	2317.13	2295.3	2617.98	2630.11	2717.35
1554465_s_at	162.193	135.254	190.326	120.417	124.092	154.711	180.081	118.38	148.667	132.726	140.952	137.271	168.087	184.247	183.127	185.457	145.827	151.491	185.824	151.464	193.403	160.006	90.2757
1554466_a_at	800.272	752.496	876.991	1058.04	953.08	909.662	858.06	958.587	788.678	851.855	833.052	813.41	797.189	724.184	679.148	762.67	777.436	765.01	743.688	704.473	763.492	700.225	955.916
1554468_s_at	134.036	163.746	110.988	107.21	123.467	72.6903	99.6503	136.829	196.136	152.2	148.358	184.436	86.7415	160.063	131.247	118.081	143.025	181.114	137.463	86.3752	173.706	117.049	148.404
1554469_at	132.075	73.3824	54.6865	69.2592	64.4465	69.8051	111.472	72.4333	103.544	100.055	54.8557	89.1923	74.4142	108.292	68.6515	70.1131	79.8093	75.5306	105.86	109.937	113.054	88.395	65.6701
1554470_s_at	397.803	485.213	447.285	441.773	468.074	477.096	414.455	387.629	339.901	448.587	454.023	475.549	342.277	372.305	355.11	422.125	489.364	457.343	369.143	246.819	320.422	399.362	319.332
1554471_a_at	607.046	551.051	588.376	550.105	495.903	467.672	710.678	605.401	637.801	441.124	476.819	442.837	652.149	677.314	641.112	498.782	504.608	489.542	659.2	579.405	579.789	570.338	543.371
1554472_a_at	181.84	163.378	182.859	146.773	128.069	146.441	168.436	137.831	172.919	165.35	185.033	139.998	176.379	231.051	170.538	130.14	142.037	124.017	226.1	179.089	211.484	162.154	122.055
1554473_at	214.929	209.624	164.306	179.688	144.333	209.728	233.43	267.264	245.953	218.934	240.557	227.609	266.741	192.844	329.374	203.177	200.899	165.411	232.896	207.281	208.65	223.462	166.336
1554474_a_at	82.0163	111.176	106.583	108.805	95.2926	104.935	88.5268	80.4553	99.1913	129.411	123.852	132.365	76.9395	111.147	103.275	93.2218	109.27	83.1468	129.194	104.289	122.133	83.8004	78.7151
1554475_a_at	12.5643	17.2125	13.6806	6.22394	13.2339	59.3331	5.64407	66.2686	18.594	50.8278	17.8925	4.38137	26.6217	15.3366	16.1675	14.7026	54.1794	39.3595	60.5119	44.2025	2.76045	30.9466	46.4252
1554476_x_at	61.0854	48.1404	45.695	51.5907	51.2737	56.2172	72.0834	59.0024	61.6049	46.599	65.4986	43.4628	47.4989	60.7009	70.0898	61.9512	67.0709	75.0664	81.3829	40.8215	60.3756	71.4452	69.2376
1554478_a_at	557.799	551.092	436.214	253.167	340.337	304.564	661.997	689.78	418.77	269.813	195.985	209.901	436.283	790.05	571.403	308.636	257.017	300.638	543.56	556.199	396.812	285.536	253.681
1554479_a_at	347.842	394.255	331.329	433.767	486.749	538.388	370.472	319.512	309.018	627.916	585.346	639.872	425.919	462.085	473.641	502.509	478.424	438.13	440.941	393.369	355.345	487.264	531.081
1554480_a_at	831.879	900.097	790.878	930.008	1039.31	1140.24	846.549	820.527	971.202	879.705	1039.31	792.52	702.392	868.94	893.709	894.444	779.45	929.126	651.727	783.681	865.004	849.168	728.928
1554481_a_at	126.606	67.5453	68.6425	130.408	108.242	61.6697	103.09	115.09	84.6666	83.7128	80.2361	37.2359	146.37	98.3194	82.9383	80.7337	107.527	91.1733	104.317	94.4036	84.6459	76.7279	78.0391
1554482_a_at	1969.43	1718.32	1938.75	2002.08	2025.35	1994.02	1988.14	2119.09	2003.45	1889.54	1972.33	1705.81	2380.3	2226.17	2461.93	2414.16	2457.45	2220.76	2428.42	2563.31	2039.82	2182.3	2229.01
1554483_at	102.853	214.244	164.539	126.804	157.464	151.683	112.47	109.104	128.561	145.059	105.263	172.18	125.988	108.532	160.4	134.25	181.56	210.872	116.709	118.236	168.73	136.217	176.235
1554485_s_at	68.853	71.4907	63.3464	67.5248	85.8238	88.5528	23.6738	54.7969	57.202	75.2156	45.7266	55.6845	77.7523	59.2007	59.9375	76.3166	77.6527	81.7301	56.3935	37.7857	60.4662	50.3276	87.7668
1554486_a_at	116.007	127.049	81.3645	78.4397	66.6023	74.297	104.996	81.1321	106.113	61.7098	68.3623	79.4938	115.88	107.791	74.7532	57.9996	66.8549	65.1721	95.6032	131.351	132.088	52.508	51.4218
1554487_a_at	79.6011	83.6484	46.5243	92.0582	86.277	104.873	77.3657	57.1655	67.3739	89.48	86.5053	81.9268	73.0093	100.543	75.5657	84.1352	87.4197	81.5496	61.0088	58.5276	93.4804	59.1792	105.165
1554488_at	97.3827	92.5456	128.385	120.401	113.049	141.538	133.703	88.0036	106.749	149.733	131.066	152.018	96.7486	156.139	114.494	126.167	101.648	180.664	130.604	110.3	100.139	109.232	119.237
1554489_a_at	494.723	451.071	540.496	537.388	506.812	610.217	482.88	472.062	511.3	528.676	530.92	551.13	542.473	499.286	415.38	582.735	608.001	682.868	529.337	540.723	441.811	563.937	439.934
1554491_a_at	24.2268	41.0652	42.2087	39.0168	13.1518	43.37	19.924	48.4467	51.6292	46.0247	23.4878	54.8462	26.9909	33.1562	79.8784	14.7894	55.9965	32.8584	40.5974	6.09888	45.3973	37.8939	23.5159
1554492_at	5.13142	23.3548	2.02406	2.55829	2.46402	14.9157	24.2619	10.5072	39.0898	2.36992	1.6113	6.83548	2.99523	2.20225	14.212	14.3329	5.21183	7.19369	9.09736	3.00834	32.8207	22.9728	1.95781
1554493_s_at	146.179	193.478	181.429	134.401	157.618	175.847	164.405	177.76	150.527	231.035	175.249	190.268	194.06	200.936	172.067	146.823	158.552	150.941	160.024	183.946	144.822	176.852	112.305
1554494_at	10.1676	18.1547	14.3378	1.14835	4.44369	27.2895	10.7146	23.1836	4.84735	19.7752	8.50405	18.1772	7.51423	2.80297	15.0252	10.8739	3.08508	3.29706	3.93273	0.999648	29.2825	15.2843	4.1069
1554495_s_at	28.3536	35.6179	27.5228	14.9152	13.5197	28.5501	12.1384	26.0799	30.3529	49.7254	3.89031	59.3465	29.5719	10.2405	6.0982	21.3473	4.92428	31.519	13.2861	13.4693	32.8412	23.9594	5.85073
1554496_at	36.5558	67.3415	46.6878	70.6159	46.4187	97.0108	49.321	30.539	37.1263	35.8414	38.6627	60.6707	42.813	44.5087	18.717	46.3791	56.8933	66.7268	58.1384	40.0843	47.6964	54.1749	41.7877
1554499_s_at	67.3252	62.1456	53.5732	92.6427	81.3798	77.1379	66.0735	66.1993	69.341	80.8052	55.0157	63.8039	56.6943	63.2498	80.6246	86.8076	100.503	67.3705	56.6643	60.0606	78.4843	46.6803	65.6749
1554500_a_at	29.7199	14.1728	36.4702	30.3519	11.9358	35.0696	15.3259	14.0551	25.9238	24.2286	26.5973	11.1412	33.6246	28.5723	2.41816	13.8422	18.5773	26.425	23.5607	30.5607	13.8561	31.1421	10.1595
1554501_at	100.073	81.1939	71.7332	75.1493	119.113	87.8507	68.3792	123.496	69.8867	86.0207	100.971	103.724	73.5871	75.465	92.0184	115.817	82.351	107.669	105.911	153.624	72.7164	149.687	122.125
1554503_a_at	48.7061	73.8465	53.8537	71.4802	72.2677	38.1293	36.008	44.437	53.3979	58.0372	98.5283	84.6852	50.2544	49.7227	57.6833	30.5728	63.3302	41.2387	19.377	43.6268	43.6737	50.1913	74.4902
1554504_at	14.6193	21.374	4.35638	15.4262	15.405	24.9105	15.6876	3.8403	5.3739	17.6102	4.7565	10.5758	14.4071	0.989043	3.33297	19.4619	5.75446	23.3128	2.89748	0.84943	13.7111	3.02095	4.48807
1554506_x_at	10.2371	11.3433	1.04204	1.30307	1.61507	7.62248	1.17979	8.08956	8.0393	11.2194	8.22671	8.83934	28.789	6.07211	10.3883	17.7379	1.21932	5.45979	12.9759	18.7716	17.171	4.41487	4.73662
1554507_at	4.26009	6.2319	0.433463	8.05521	0.738804	11.3323	11.4655	4.96224	10.0841	9.8546	9.14007	9.8555	7.0837	7.25364	7.30268	9.00041	5.21391	6.96111	15.9456	1.09162	8.13862	14.8533	5.28035
1554508_at	9.82912	13.4073	11.8259	14.048	44.4192	5.84058	18.0331	3.2467	10.171	33.9847	17.2367	28.2397	27.6214	12.9898	1.8118	18.8417	22.0073	22.3251	21.117	42.1847	20.5906	28.8426	26.0779
1554509_a_at	202.26	203.216	288.598	245.928	180.201	175.257	207.892	206.864	188.174	185.355	227.628	143.912	251.231	179.796	239.205	242.548	206.821	200.693	243.044	273.194	226.329	208.819	202.248
1554510_s_at	5037.79	3959.65	5461.57	5493.91	5681.72	6221.69	4728.08	5136.14	4932.87	5601.61	5940.13	5433.85	5280.2	4948.75	4822.56	6413.05	6722.51	6488.76	5109.13	6098.37	5273.48	6010.25	5609.44
1554511_at	8.3185	2.91562	25.1814	2.28232	30.104	3.49176	8.36575	8.20321	7.09216	38.2188	88.4582	62.1286	5.50062	3.87218	4.08975	4.51516	4.3208	8.62977	11.9133	19.5624	37.2254	4.06075	5.14906
1554512_a_at	214.492	152.756	141.328	232.964	152.115	235.041	144.906	170.803	189.303	180.183	162.686	126.729	231.24	140.444	186.059	196.904	226.618	195.113	376.742	383.245	162.379	270.518	143.613
1554513_s_at	227.896	152.813	174.457	184.319	162.497	167.983	213.061	188.904	190.977	181.363	175.895	149.323	187.671	224.943	178.985	206.421	192.058	138.754	210.977	216.685	216.31	233.127	184.973
1554514_at	46.0137	66.4544	40.857	27.5073	44.0902	46.3135	45.365	55.3153	67.5166	46.4818	40.3317	70.9832	43.7004	57.381	32.705	51.4199	49.353	55.7999	36.5848	72.0185	79.033	78.5298	52.3403
1554516_at	120.113	184.058	122.348	105.434	98.9093	97.0749	135.911	114.214	84.4975	73.0473	72.966	133.139	125.87	95.584	125.99	84.992	125.659	119.835	146.827	95.6441	106.088	120.503	81.6306
1554517_x_at	120.296	112.646	109.482	47.2513	122.234	156.861	157.761	105.339	111.735	112.756	106.675	107.948	140.825	107.688	124.724	146.011	145.381	109.533	107.728	61.6936	139.15	151.203	129.185
1554518_at	324.317	253.769	229.08	493.767	382.96	385.41	356.931	256.97	261.999	393.152	269.188	259.733	363.557	253.67	266.748	435.025	346.442	284.116	252.356	207.922	285.405	376.685	354.581
1554519_at	33.298	75.6118	16.7489	25.35	35.9064	36.1953	16.0501	28.2445	29.1376	25.8714	43.5833	53.641	8.31202	40.0541	26.6861	32.9604	46.4772	27.2287	13.79	22.3623	38.8057	24.9934	18.0362
1554520_at	35.372	4.28559	30.6588	71.8094	39.1379	51.745	29.13	31.0936	11.8999	64.8055	59.8229	71.5292	21.2992	7.79348	42.2711	46.6013	55.3751	57.7086	30.657	25.4996	7.49259	44.7852	54.1221
1554522_at	117.856	107.073	95.0994	97.4948	68.0521	81.986	94.1599	82.789	92.7879	69.1086	81.7454	63.956	82.6855	110.472	63.5327	61.0959	41.6902	56.9862	93.0492	98.6464	63.4488	41.0916	56.9956
1554523_a_at	90.6753	101.444	95.5327	63.3512	97.5505	80.5246	83.1897	77.0516	116.491	89.2867	70.5953	32.6213	101.295	73.5924	80.249	61.1502	105.129	66.2618	84.7566	88.2992	70.4612	46.565	76.1317
1554524_a_at	1.13421	1.06166	1.80163	2.99825	0.87888	2.59268	3.04714	1.04292	1.02597	3.36909	1.94232	1.29063	2.59349	1.37493	4.20923	2.40518	2.59723	2.97435	2.68434	3.1414	1.58924	0.998518	1.80773
1554526_at	13.1036	33.4184	24.5449	19.7523	3.53352	3.48717	21.8438	17.8188	11.3994	6.01128	6.47708	2.66671	3.54295	2.81069	18.7454	3.51199	2.29108	28.3807	17.1576	14.8506	1.45262	8.442	9.86539
1554528_at	22.1317	33.8488	39.8885	34.7628	74.1981	7.31747	30.7491	17.249	26.8167	74.137	25.9286	56.8088	21.0446	36.9344	39.7655	52.1426	26.7381	44.665	46.1612	23.6851	47.6235	17.7214	56.7665
1554530_at	3.57136	4.5572	4.24299	3.73829	11.8594	3.70683	3.83354	12.3764	3.4402	3.51954	10.3898	14.0233	4.73159	23.6601	3.29265	2.92052	25.1936	21.5633	6.38057	4.66187	7.27877	4.39117	8.93922
1554531_at	38.2842	86.951	63.4886	53.279	61.365	59.7878	73.9492	47.0956	48.2115	59.4749	79.2255	126.809	47.8082	72.483	18.6323	61.7499	65.1866	68.1969	38.4908	111.964	91.0582	60.837	67.6748
1554533_at	5.98741	1.1528	8.80422	0.982851	9.41603	0.965378	3.12168	10.1372	2.16356	0.987026	1.33332	1.46665	1.59847	1.03824	1.69126	0.475976	1.27603	3.25099	4.30699	11.1713	3.72516	1.88297	7.9827
1554534_at	49.5235	57.1519	55.9099	26.9889	82.255	59.436	46.4898	19.1233	51.8792	63.2354	40.7763	45.047	74.0711	25.0699	42.8955	29.9205	57.784	85.1315	38.3132	33.8367	70.7741	60.8364	74.5035
1554536_at	2.06669	13.9181	34.5445	11.8248	0.704261	3.77998	2.53174	2.57552	22.1096	16.1692	28.6305	16.7106	18.851	4.81168	14.658	5.99838	8.25462	27.4494	14.0869	17.4589	20.6178	15.1069	14.9449
1554537_at	111.805	103.518	109.915	76.6416	116.389	78.5699	107.056	103.725	82.827	95.2441	72.6208	65.401	107.172	93.1904	96.0455	83.2535	88.9805	79.8785	102.867	109.363	65.2281	92.6884	99.4135
1554538_at	146.546	192.087	113.365	79.5616	116.891	119.796	85.5222	90.9389	144.652	72.9316	116.913	113.575	153.585	116.002	187.629	162.897	145.01	164.016	188.671	141.38	184.576	140.953	188.203
1554539_a_at	501.579	497.517	593.113	424.77	472.049	317.043	301.448	410.14	386.56	159.373	156.035	188.815	859.179	888.213	770.753	711.837	743.633	772.503	740.227	865.767	832.448	1082.41	1353.39
1554540_at	74.4785	51.4117	39.0122	64.5846	79.3684	74.0946	85.4483	55.9144	69.4697	71.0203	82.3091	80.2441	67.7305	53.4309	40.8024	66.2291	63.2813	58.3465	57.3081	56.6598	43.6092	75.1305	35.5525
1554541_a_at	34.1069	26.3765	2.65262	6.16926	5.06967	2.63206	5.73896	9.13715	10.2759	27.6633	1.99438	12.963	2.37136	3.0337	7.81304	6.79167	7.72437	31.3634	4.70712	14.0276	12.3132	14.1037	6.64867
1554542_at	24.7123	49.1681	9.02136	22.0622	59.1673	45.5918	7.64825	30.1711	32.3222	33.9414	6.75078	11.6077	43.8539	32.0341	35.1117	3.77369	25.247	39.914	43.8836	1.77861	44.5982	34.3979	37.6079
1554543_at	133.737	191.699	186.25	139.546	175.877	108.35	128.917	134.954	168.253	134.008	112.343	134.241	167.457	123.259	158.77	113.921	139.035	224.727	193.799	205.584	227.37	130.02	216.19
1554544_a_at	464.249	454.875	507.001	462.319	441.783	447.01	419.698	444.631	439.44	292.242	322.494	336.444	457.366	407.009	452.88	436.234	383.898	474.175	463.194	466.969	481.022	351.992	411.795
1554545_at	27.3966	58.4987	50.7096	46.6102	66.1082	56.4177	36.4586	15.058	57.3633	42.1566	45.4128	82.0163	38.6047	63.0531	49.3105	25.7622	52.7401	63.7828	34.789	10.1078	45.6732	68.949	42.3888
1554547_at	7.06117	16.2943	2.44943	12.7021	23.5278	11.162	28.0824	1.10278	8.99091	19.4618	2.20441	9.85343	2.4655	2.20328	10.4385	6.26633	11.9077	3.63549	10.22	24.0927	9.4894	8.66655	1.65176
1554549_a_at	210.521	351.089	308.303	127.944	152.901	119.136	225.491	206.591	258.562	176.389	172.853	203.901	172.528	214.825	197.165	138.855	127.83	146.486	198.675	199.073	221.002	118.298	105.398
1554550_at	43.4825	45.7486	35.0141	25.4378	21.0702	32.5157	20.153	13.4571	26.0895	16.8616	13.5137	19.4506	19.1351	4.51134	8.39505	4.88818	15.1071	44.8303	32.5498	21.5633	11.0224	11.3789	13.4349
1554553_s_at	303.656	286.698	365.693	404.114	344.956	393.462	334.672	305.16	272.32	345.229	296.26	344.603	347.706	283.842	316.05	311.263	409.017	367.828	305.222	263.466	356.999	347.215	348.703
1554554_at	10.7358	6.73789	3.10534	4.53226	10.2207	9.28033	3.80109	8.40014	4.0233	10.3815	3.0546	12.3095	3.72039	13.5852	2.84078	10.3346	5.38785	6.33931	3.66315	10.3338	9.67642	5.88873	6.10153
1554555_a_at	656.871	708.627	772.981	780.236	784.95	768.104	623.988	748.67	601.378	619.908	653.642	608.367	635.526	619.655	575.011	544.187	639.752	643.646	506.318	563.097	547.535	523.16	661.06
1554556_a_at	164.725	145.318	142.223	141.555	198.343	195.861	140.607	186.33	175.723	144.653	177.053	159.296	176.56	159.268	198.354	216.534	183.333	128.74	238.481	255.465	178.479	195.552	168.836
1554557_at	347.889	305.206	272.803	296.234	281.449	313.462	267.822	286.776	343.383	307.596	334.956	272.575	234.804	359.676	378.149	230.644	361.369	336.641	415.81	338.193	341.683	420.126	346.961
1554558_at	55.495	31.1201	38.857	21.0387	25.705	28.7003	23.0816	17.7777	41.1686	59.0938	15.0318	28.8841	34.4948	18.0464	19.432	21.1476	34.2726	36.9104	22.3508	37.9082	29.9978	36.3509	35.7958
1554559_at	40.9428	60.4879	12.7872	48.57	9.97383	19.7165	11.6639	6.92782	11.8485	54.3701	7.65153	30.5625	36.3078	22.9901	43.5821	38.7603	9.36728	54.1415	30.3736	11.3938	8.81604	16.0905	74.2098
1554560_at	19.2379	13.2747	14.3163	1.76753	47.6271	29.0015	35.9026	33.4371	24.0193	36.4794	23.2717	28.3363	20.4633	33.0058	8.45224	31.9208	29.6067	47.4143	14.6115	11.089	23.7675	18.7306	47.3782
1554564_a_at	44.1818	48.1824	49.8184	53.066	67.8716	54.528	33.5792	39.8156	45.6915	47.9237	44.935	85.5476	41.9425	52.3805	24.4469	68.7253	42.1033	67.5841	30.3001	49.0751	67.2054	54.2647	62.5409
1554565_x_at	69.2198	25.4623	17.1469	76.9556	63.3038	70.934	77.4307	91.939	63.3612	124.097	129.141	84.9201	97.7552	71.2689	42.7437	98.9733	100.689	39.6317	73.6568	74.1163	29.4253	95.6727	133.907
1554566_at	50.0951	70.739	51.1215	44.6465	58.8753	46.0264	47.9986	47.2238	73.5926	59.1796	45.799	62.2491	46.5658	52.4084	74.4732	34.4244	79.4352	70.0837	15.7607	73.7668	86.7377	65.1888	45.5125
1554568_at	45.4498	48.4555	6.64526	15.3776	37.8631	40.1414	50.6516	52.7065	69.0504	48.3027	23.6372	34.4853	38.3872	24.4116	28.2841	34.0527	40.3243	31.013	46.5755	41.7485	42.4232	20.3826	32.4556
1554569_a_at	31.8236	34.7148	3.62263	35.653	21.107	36.6933	19.3275	22.2879	21.5198	53.5749	40.622	25.3115	23.8161	11.6955	19.4226	31.0263	41.1318	26.3247	2.48859	9.97821	35.7074	26.3286	20.4518
1554571_at	5.20076	41.4093	4.10202	35.0094	15.9425	1.55449	17.0654	3.71492	27.6384	1.89651	4.06414	21.4385	2.42481	22.5278	7.67761	5.4231	6.27606	28.3548	4.36584	28.3487	21.7664	37.5125	48.0914
1554572_a_at	1675.23	1381.43	1488.81	1170.59	1065.36	1332.85	1573.79	1359.91	1568.4	949.402	1103.43	929.761	1426.39	1372.8	1396.03	1352.23	1185.56	1140.62	1356.99	1174.57	1126.22	888.549	925.269
1554574_a_at	327.419	323.162	387.378	382.275	344.009	382.238	330.514	409.788	364.269	399.986	392.318	368.815	388.636	315.634	364.901	460.002	430.604	452.812	408.706	309.172	408.858	477.508	530.836
1554575_a_at	1138.84	1171.71	1091.92	876.459	1276.85	645.61	1451.12	1703.12	969.933	1143.49	485.945	628.032	1647.87	1633.49	1179.84	719.381	812.423	802.221	1360.06	1744.88	1285.44	1034.68	856.247
1554576_a_at	160.193	229.682	167.263	198.284	279.569	324.999	146.478	145.798	166.856	228.69	153.428	194.46	175.374	161.905	178.274	197.306	220.075	255.365	155.256	200.061	154.564	175.56	148.711
1554577_a_at	1986.82	1697.41	2100.58	2442.34	2528.26	2428.04	1773.92	2001.02	1714.63	2292.08	2411.02	2377.06	2084.82	1871.81	1734.69	2746.33	2522.9	2526.34	1798.11	2238.75	1861.93	2228.3	2266.49
1554578_at	66.8154	167.363	69.7722	61.5312	95.0094	71.3852	110.942	118.555	97.12	93.5878	142.172	120.617	114.295	67.9203	116.184	101.575	72.9958	107.615	104.89	94.3473	134.47	123.505	141.689
1554579_a_at	6.15148	42.411	5.1903	17.7157	6.70478	9.15087	2.12998	1.48384	1.34903	9.32411	14.2914	7.35276	3.85056	3.43238	1.73193	2.01863	1.56349	25.0448	4.99795	3.09888	16.3166	9.7289	4.20654
1554580_a_at	44.7476	128.962	107.605	102.345	53.6308	79.5187	38.2003	60.192	86.7015	78.5888	98.9179	92.7317	50.9546	70.6317	98.8519	73.1785	69.4887	57.8587	51.9591	110.819	54.6541	74.3959	51.444
1554582_a_at	68.5823	63.1394	52.4666	49.1318	65.3926	70.6234	48.5993	37.6032	38.4208	66.044	89.7285	58.1803	23.2157	35.2878	32.2495	47.1131	85.0297	57.1059	45.082	23.5826	39.0419	61.2899	55.2838
1554583_a_at	7.42419	10.8593	14.8716	7.69689	10.9099	7.50997	8.4851	14.8775	11.7316	10.1101	16.5775	6.65986	21.7939	4.37623	7.84385	5.97139	7.57177	11.529	4.48539	5.76884	8.50549	5.98839	2.23007
1554584_at	64.8288	85.6836	59.5788	24.283	35.3821	18.8896	39.4322	94.0127	16.8388	53.7066	56.331	70.1876	62.9668	40.9666	68.9569	53.0607	45.5706	18.72	35.7478	24.4011	92.9241	53.9784	34.2099
1554586_a_at	204.987	223.066	207.322	274.225	239.137	290.585	136.534	142.409	111.031	134.71	122.695	81.3297	248.63	236.281	210.024	352.75	365.923	296.16	200.572	188.888	186.038	332.626	292.719
1554588_a_at	136.364	117.379	109.669	198.006	210.157	224.945	111.181	91.8044	101.358	185.488	160.293	150.849	111.504	96.9546	100.627	218.685	203.21	199.955	102.743	88.2201	86.8228	174.86	158.702
1554589_at	156.043	237.997	126.148	140.339	158.046	153.011	120.156	181.07	160.563	242.537	205.348	244.191	180.067	161.575	139.747	172.805	150.554	199.498	188.509	173.192	163.517	181.989	156.62
1554591_at	60.0244	80.5292	60.6303	56.577	60.1264	57.2588	39.3854	27.6957	57.3083	68.3311	23.7249	61.2964	39.2283	46.2143	55.9577	46.3152	72.5138	67.093	28.0292	31.338	57.9257	64.8405	67.3391
1554592_a_at	6.81526	26.0913	32.7625	19.0811	14.1018	26.0216	2.95172	19.2311	16.6872	7.54175	1.4724	17.5667	7.20473	16.9881	0.910422	17.1301	10.6432	5.35976	21.7441	8.6714	18.9679	17.6127	31.6632
1554593_s_at	3.17073	8.88412	4.87768	5.23071	6.30217	3.49782	7.02581	1.28087	2.87323	1.78032	16.1696	5.59491	0.808927	2.22844	12.8837	11.5264	5.79332	4.0311	4.71068	1.76864	1.18085	2.0305	2.12955
1554594_at	121.135	70.5951	99.321	81.3905	91.8836	75.1716	74.7001	99.594	97.6886	153.003	183.218	145.701	91.7795	80.0039	122.076	107.291	171.805	169.107	189.898	103.094	126.687	142.691	145.128
1554595_at	467.45	542.179	506.012	511.988	530.541	601.25	571.181	474.774	479.719	595.513	551.015	604.579	476.115	530.911	580.12	505.495	576.881	557.423	592.699	616.571	616.925	510.275	671.986
1554597_at	414.972	454.525	428.165	452.206	455.357	433.37	416.132	391.508	346.523	314.074	342.646	349.852	338.544	413.112	348.565	425.403	404.15	442.626	399.35	299.846	347.289	316.336	326.817
1554599_x_at	521.58	618.064	687.548	675.633	597.278	567.022	575.795	631.823	531.325	451.673	480.891	488.761	580.95	530.856	573.314	494.49	589.43	615.443	546.774	573.189	493.54	454.148	488.892
1554600_s_at	3031.05	2677.49	3247.84	3415.83	3360.68	3423.66	2791.79	2958.48	2741.11	3739.17	3814.19	3385.53	3489.64	3123.69	3189.17	3843.61	3953.18	3581.7	3241.95	3104.62	3000.33	3955.66	4318.13
1554601_at	22.3624	22.862	31.5001	42.3275	36.3393	16.3755	3.12315	24.8645	38.2092	20.541	16.5309	19.8161	30.1416	21.6519	21.507	33.3104	42.9169	12.0751	34.1726	26.0759	32.6991	23.172	26.9964
1554602_at	263.391	253.153	282.673	245.138	269.709	303.123	186.778	355.533	238.527	339.968	389.557	398.624	274.308	258.964	273.026	227.6	292.222	258.874	286.034	306.453	302.023	245.682	306.074
1554604_at	50.1134	54.1367	44.1863	84.9785	39.3762	87.4154	75.1503	25.8206	36.1157	57.2377	29.6864	39.7999	57.064	31.27	91.3439	42.4762	34.4358	34.5931	25.3094	26.8476	29.8305	79.5854	43.4246
1554606_at	209.94	206.29	202.294	264.507	271.702	329.811	217.932	189.081	198.539	273.777	211.708	183.8	156.554	212.935	142.231	198.268	265.02	215.308	159.813	81.1303	157.624	218.973	177.055
1554607_at	47.045	6.13727	34.5917	25.0292	25.899	35.5297	23.2515	24.9241	23.6735	30.459	3.52788	35.4405	18.6829	23.9356	22.5985	26.4363	17.0367	31.8875	18.6339	22.4703	28.6622	40.3866	41.7352
1554608_at	145.674	156.729	153.215	147.986	150.306	176.988	116.857	117.504	190.822	172.003	114.024	216.818	144.037	155.74	166.386	188.028	194.66	167.775	174.107	175.644	160.965	172.311	256.086
1554609_at	121.017	124.152	124.443	177.581	169.846	183.112	80.1239	62.3967	92.1933	130.798	103.865	189.222	108.994	127.52	136.158	189.51	184.578	162.882	132.786	86.461	117	173.011	169.06
1554610_at	28.3452	41.7276	48.0401	30.7939	38.6515	22.0601	17.8199	45.7224	9.27549	35.8863	41.1808	45.512	48.8567	13.6697	54.4183	28.6149	28.6846	45.223	45.5137	14.2143	8.08456	45.8745	9.56812
1554612_at	30.0966	25.6815	21.4313	20.4018	28.5078	21.2202	26.0618	26.71	31.9679	14.1079	26.0536	23.9287	37.3816	32.1105	21.7086	17.4567	39.2751	41.6712	30.8597	43.2669	29.0571	25.0509	29.3009
1554613_a_at	7.14014	21.0803	18.3598	5.23219	3.48399	16.3023	17.6385	7.82255	3.41455	47.9646	24.6737	18.2493	6.31036	7.28643	19.8802	7.14583	7.34654	5.2843	9.02438	6.59536	11.1854	6.48286	31.3915
1554614_a_at	95.0793	94.7743	98.5114	72.7381	80.3055	106.589	91.4792	95.8711	105.651	67.0132	106.934	108.607	124.664	91.0292	77.6731	86.9989	96.4876	86.0412	90.779	93.545	108.072	69.1425	18.2648
1554615_at	6.11289	15.559	17.7613	3.10207	24.0766	17.8727	24.9601	2.80165	7.75526	3.02937	6.07629	9.62369	2.48585	25.1595	9.47359	14.9338	7.08298	5.7386	10.1809	6.25536	7.12433	7.84268	4.41837
1554616_at	75.8246	138.362	76.7927	85.5188	100.869	117.104	63.8449	72.7331	66.7626	100.053	78.3958	99.9621	46.7049	70.3896	54.2426	70.7285	73.8194	139.65	111.224	65.6985	81.8878	95.1768	101.3
1554618_at	6.39009	4.90268	9.81055	28.8663	2.81252	7.95509	17.0257	40.4526	7.7346	9.72821	8.07608	6.67936	5.26681	9.92785	4.57988	27.5375	6.07992	13.6419	15.0227	3.67142	12.0745	23.0995	4.28526
1554619_at	94.7033	82.962	148.599	81.9003	76.5331	92.3253	59.5427	63.1394	80.8961	52.3409	64.0574	52.5782	119.736	37.681	99.6078	76.3731	67.2019	100.776	76.29	45.4002	73.107	84.4292	64.626
1554621_at	50.7906	32.6247	41.25	14.9371	34.6435	38.2945	20.3513	17.0134	7.08939	28.5163	21.484	7.43532	45.9916	35.7751	21.7507	46.919	20.9592	27.042	42.2599	30.332	8.76807	30.7804	31.8668
1554623_x_at	34.478	44.6091	33.561	29.8048	23.0435	50.2218	27.0149	29.7484	45.1385	37.7079	27.8601	9.27809	38.0838	36.7856	35.5167	30.0742	17.5661	25.2333	35.2212	44.9212	46.1335	37.1532	21.6557
1554624_a_at	13.7429	28.9013	52.3822	34.708	41.7677	43.4752	35.526	59.9244	38.3532	31.3317	33.3969	37.5468	55.0275	49.5954	48.789	24.4079	23.702	56.0631	54.9349	56.2649	35.048	34.8286	40.0421
1554625_at	104.812	74.248	59.0136	62.8436	57.6576	84.1445	52.4461	90.5805	38.1577	98.1117	60.1559	72.8833	80.9889	11.9355	79.2675	24.9403	18.2147	57.9269	52.9669	63.8063	61.51	67.7164	70.7072
1554627_a_at	951.387	930.31	1101.57	1267.4	1384.75	1267.76	860.92	1012.44	898.316	1162.46	1193.27	1177.32	1176.91	1037.95	1063.78	1483.33	1532.67	1315.38	1031.33	1101.75	1068.27	1561.09	1701.34
1554628_at	512.054	469.804	475.963	400.638	413.54	386.847	394.998	393.864	454.22	251.043	240.429	230.269	521.42	470.308	517.886	464.584	463.785	425.985	500.148	573.64	503.169	427.935	460.677
1554629_at	3.80111	3.25701	33.6553	12.1205	24.7345	4.02435	3.78491	17.5834	27.305	4.05908	31.7707	4.05868	23.1206	3.98233	22.5202	3.98009	18.2215	36.9663	22.1675	5.10729	19.323	29.9349	21.1403
1554631_at	59.2778	62.4121	87.5144	124.75	89.5737	71.2835	68.4911	75.3366	81.5793	67.8633	110.935	109.265	60.3917	80.2993	88.514	85.8608	88.7057	97.8803	29.7708	64.3983	81.5212	117.887	117.841
1554633_a_at	1.79435	2.47915	8.46954	3.29551	3.08171	5.59649	2.0574	4.83053	5.29178	23.8192	5.45452	4.19908	2.17109	5.43371	4.54036	4.59758	2.69332	2.26901	28.5586	2.75806	9.58168	1.93714	3.95421
1554634_at	8.40283	19.3149	2.22443	26.0231	10.7152	2.19828	2.87762	5.13029	23.518	6.23245	5.25698	5.12061	11.5393	1.98608	25.0618	2.23797	24.6533	5.47496	1.38937	21.9637	6.08295	4.69863	4.69034
1554635_a_at	9.31891	11.9056	9.06505	8.5584	16.9363	16.9741	29.5031	17.4782	20.1651	27.7787	8.9943	10.0698	44.4428	7.18792	11.8496	14.2488	9.14395	11.9667	10.7278	15.8848	8.78353	17.1371	8.71805
1554636_at	54.26	48.2735	28.5718	34.1863	3.49703	28.0767	44.8776	33.034	36.4871	38.2609	23.786	36.5222	41.48	24.2224	34.5557	32.7873	27.2111	24.6625	20.9459	21.2167	23.8542	39.5172	18.3534
1554637_a_at	85.1136	80.8919	98.9351	115.45	146.943	118.505	85.2992	78.496	102.147	113.019	107.061	141.896	116.37	80.23	110.696	120.235	115.731	124.407	90.5856	67.4241	116.379	103.332	124.136
1554638_at	283.404	299.991	246.914	336.485	356.088	283.765	258.873	250.367	237.33	280.633	187.973	258.713	229.451	313.149	229.743	287.955	277.034	244.337	228.177	227.385	236.182	224.39	216.614
1554640_at	78.5918	51.9036	51.936	37.2697	19.0371	6.84168	43.9174	55.4677	43.3207	4.68238	31.0658	10.7228	25.0234	60.7473	63.6811	16.6855	23.2551	20.9428	51.764	69.7314	62.4188	23.7472	2.91489
1554641_a_at	25.8084	35.5168	36.187	8.03967	19.6638	8.24987	12.7986	9.53178	9.79	38.2557	7.46829	22.8905	20.9404	24.8286	27.1191	35.8851	22.3105	8.53249	8.55896	76.0501	34.6916	6.50462	10.0706
1554642_at	91.4317	87.0716	73.9336	65.022	70.136	94.6842	70.065	83.876	66.8934	82.4555	86.2996	99.8249	93.8322	68.9182	88.2237	57.0637	66.0062	101.871	59.6602	87.8846	81.5868	116.195	131.484
1554643_at	52.5799	47.6143	30.6091	25.9714	29.4007	29.8054	28.4608	23.5037	45.4995	15.9599	47.6481	9.40447	42.969	32.2257	42.9535	29.7012	9.26286	36.4506	10.1085	5.87482	6.16094	36.95	6.70304
1554646_at	53.1575	93.5013	66.965	65.6001	75.2068	73.1972	44.5802	53.8304	57.8178	49.4012	28.8168	96.9835	99.496	112.004	61.0165	65.7801	66.9969	100.934	58.6259	33.8772	76.2499	55.3888	57.819
1554648_a_at	23.218	45.674	61.2466	38.0801	36.4298	31.8566	30.1957	31.9706	57.1144	36.3394	26.6762	35.3532	61.3136	27.7133	84.304	48.2742	33.4243	64.9953	57.2878	23.8366	32.8428	65.5888	30.8838
1554649_at	70.0912	90.9954	101.652	122.228	103.183	99.8572	73.6154	26.0181	94.2031	121.663	89.3885	69.918	80.8108	75.0614	81.6304	73.1972	83.1914	92.5821	83.6075	67.8529	98.0068	94.8197	94.8952
1554650_a_at	14.5343	15.827	6.76301	2.82718	14.6204	10.8848	8.99456	28.7594	49.9372	11.8	20.3345	6.08296	39.8634	8.51951	11.0308	29.4387	14.6482	12.1533	18.4184	49.2953	8.2521	42.9538	38.441
1554652_s_at	7.05485	10.8593	10.9354	6.46302	28.0006	4.35655	3.2276	20.5489	10.4427	40.2307	14.2608	14.6597	8.80548	24.2473	7.5719	7.0845	29.7092	28.8675	3.83721	8.77891	8.48246	3.23926	22.881
1554655_a_at	41.0704	16.063	27.9155	16.9152	14.2089	21.6591	5.76465	9.1981	11.3069	30.1415	4.48119	44.1884	7.75416	24.882	26.5313	21.7865	28.6745	10.5803	11.2743	8.02043	50.8687	6.28967	9.10129
1554657_a_at	39.1959	25.4817	28.9603	6.60074	52.7617	22.436	36.6811	53.5364	72.6039	8.20552	62.7152	54.4662	29.864	39.2926	18.3062	2.29596	26.0398	60.9887	29.5434	8.73606	14.1671	19.2315	25.7581
1554659_at	43.3572	68.1785	62.8194	71.7474	62.891	74.9818	32.6369	54.5907	62.5701	67.1152	45.0904	70.7464	47.6038	42.4071	79.845	49.0187	51.1077	54.9301	69.0879	97.3186	51.9879	68.2479	58.0845
1554660_a_at	142.272	125.413	116.33	106.609	73.8814	61.2116	195.248	105.888	202.405	106.048	80.8727	95.3757	129.45	170.736	92.8515	108.557	49.1252	60.7642	87.1596	76.6959	147.904	168.386	140.489
1554661_s_at	221.344	232.73	264.208	204.831	192.813	214.592	242.416	333.742	295.398	242.147	274.796	305.738	254.268	202.136	233.179	215.116	215.617	227.363	314.924	240.288	221.831	221.068	256.118
1554662_at	8.17357	4.35128	7.94609	3.64431	3.50134	3.71235	3.96389	10.1094	4.9458	15.4187	9.26448	5.12231	31.6122	5.20523	7.33855	3.92592	3.63736	6.15753	4.9534	19.9945	4.81465	3.62414	3.90691
1554663_a_at	44.4893	2.5566	5.81437	24.7087	24.3893	33.2891	16.7345	10.1047	34.6272	10.8261	20.9353	2.15316	21.1623	4.9907	17.4564	25.2778	3.82836	29.6025	30.1561	5.96484	8.22492	23.9099	34.0396
1554664_at	51.5334	72.6766	71.3575	49.8381	90.2736	58.2406	53.7358	66.3122	45.7396	91.0235	57.9564	128.047	49.4525	67.6406	59.4384	26.4085	62.4934	56.6585	44.2961	69.2834	90.327	57.2503	62.3069
1554665_at	34.4593	41.1901	35.8952	39.6855	32.7492	47.5408	45.0083	26.7644	34.2653	23.4372	43.9267	28.5134	31.0811	21.6241	34.15	37.7654	37.8801	46.5415	38.566	27.4759	32.0527	25.7177	28.0656
1554666_at	95.8889	59.746	67.2186	80.9427	49.4267	64.0037	70.5231	55.4827	85.367	67.9894	96.0596	70.9464	9.74547	67.8328	47.7979	64.8637	55.6276	110.016	84.2002	80.5523	86.538	32.2779	30.7209
1554667_s_at	1756.05	1647.97	1664.49	1624.45	1547.93	1554.85	1410.95	1424.14	1288.24	1026.14	1026.4	937.785	1848.72	1764.46	1579.54	1495.45	1535.99	1503.51	1602.98	1128.53	1555.04	1319.87	1198.26
1554668_a_at	33.049	5.79031	39.1354	17.0196	5.64748	7.53526	11.1934	33.9607	10.4982	24.2137	14.3967	6.06076	13.0026	4.62016	15.6397	5.29389	32.8806	33.445	4.39848	7.08967	5.33345	4.99312	9.28181
1554670_at	215.341	207.085	221.612	201.071	233.024	234.933	231.534	212.09	207.798	200.693	187.904	180.832	209.063	240.84	225.026	224.285	242.134	228.544	237.998	216.156	265.42	217.414	201.646
1554671_a_at	107.77	30.2151	71.4365	59.7052	91.9384	59.1636	105.701	61.7932	76.9582	26.9699	49.6622	39.5544	88.7081	80.9165	36.0264	85.3891	53.2185	64.0992	39.3932	60.8551	45.4662	69.2672	31.0546
1554672_at	36.1422	57.6048	46.5165	13.3494	30.3127	17.3407	37.1236	32.5156	35.6771	43.9943	25.406	24.8438	47.3006	42.7648	40.3314	26.0636	41.8395	58.9988	45.5671	40.5467	50.0162	59.5847	44.7417
1554675_a_at	21.2165	2.198	16.7072	6.04699	2.73742	15.2232	3.25507	6.15463	2.56589	1.68385	1.66796	16.5301	4.01656	3.67345	11.1348	2.07588	4.73813	24.5863	28.2099	2.33202	6.57081	2.30277	26.8043
1554676_at	55.3155	79.9824	68.9902	71.2834	46.3723	36.836	68.285	90.124	41.3283	48.8848	67.327	38.0632	51.5337	85.8247	49.0291	36.8268	29.4658	54.7993	44.987	70.3751	65.9865	70.5767	51.3161
1554677_s_at	53.2253	47.3041	61.5112	50.2107	42.1697	9.79793	59.5386	54.7896	42.0601	69.7186	85.4827	50.155	49.4477	70.8068	59.7315	52.6667	49.0673	47.6983	54.8195	49.7207	37.9882	52.1636	49.5897
1554678_s_at	4065.75	3738.4	3853.8	4228.13	4092.8	5300.21	3123.18	3297.73	3638.09	4948.19	5259.4	5150.18	3472.73	3156.72	3805.6	4382.23	4303.16	4239.42	3768.79	3421.01	3227.5	4317.11	3581.85
1554679_a_at	4638.34	4508.6	4901.23	5184.13	5190.29	5183.45	4532.31	5132.1	4288.09	4596.47	4470.27	4413.73	5036.22	4398.8	4589.81	5287.02	5420.69	5191.85	4887.07	4210.71	4679.06	4801.61	6148.96
1554680_s_at	5.09022	10.0181	37.5583	13.2258	2.67055	26.2048	35.7613	15.4006	16.7951	19.114	17.4501	9.27548	44.5291	15.0783	33.3944	38.6905	25.074	17.8494	41.8847	12.6407	25.6018	55.4562	39.406
1554681_a_at	6.6902	4.78533	7.06221	3.21938	23.4942	8.38851	3.92933	7.46364	4.08153	31.1475	9.89786	50.2165	12.0718	3.05175	3.03782	3.37705	6.28827	25.937	3.0212	5.24197	25.9424	3.88416	12.0385
1554683_a_at	8.17073	33.6193	22.8566	65.4304	84.7504	52.893	41.2015	61.6503	9.58788	9.52288	60.2917	20.3554	15.7292	66.3985	34.9953	12.0854	12.9523	92.7605	21.0401	37.031	54.7087	25.6165	20.0448
1554685_a_at	4.87015	4.54332	2.75084	2.0015	7.42418	2.86474	2.33513	2.47614	2.92709	2.78255	2.24259	2.72427	2.34684	2.22195	2.64717	1.81329	2.93055	3.75526	2.24476	2.63743	2.89328	2.79558	2.0827
1554686_at	27.4097	33.9293	15.4626	23.0505	45.1617	32.1868	36.6586	22.8538	35.3783	33.4231	13.8484	49.4236	22.4639	17.8675	26.9952	19.5462	20.8533	24.6751	20.6049	17.3215	37.1966	10.6922	21.3254
1554689_a_at	52.0975	9.18308	18.1692	24.7976	52.6832	31.9781	50.2187	20.0933	34.8566	23.4587	44.6117	32.6444	22.2991	4.56734	41.0789	31.6197	19.125	32.3658	30.3775	10.8385	6.88735	31.4532	31.142
1554690_a_at	292.926	237.026	293.398	275.227	225.705	264.373	323.799	332.345	315.895	257.564	230.087	198.523	402.492	368.773	431.633	352.179	347.118	352.704	373.361	333.091	330.214	376.668	385.421
1554691_a_at	349.714	382.574	304.092	299.696	317.588	304.388	289.109	311.067	300.157	315.205	281.801	301.739	342.305	341.532	399.751	379.603	400.681	440.06	338.718	361.679	411.502	330.315	403.403
1554692_at	18.6356	41.1809	31.4782	26.8309	49.0511	46.242	38.0831	40.5962	33.9235	4.08169	23.0478	28.783	52.8708	27.9089	39.4187	13.6118	28.0587	38.4958	39.157	47.6608	21.326	22.1386	39.8109
1554694_at	10.1964	1.94999	20.2533	3.99959	1.72141	12.3969	4.32814	1.20419	2.07352	3.73344	13.4422	4.38664	5.53182	3.09039	3.41017	6.21002	9.57694	3.07906	23.8449	6.60255	1.6497	5.847	2.35662
1554696_s_at	2925.09	2590.71	2985.54	3711.72	3622.2	3368.18	2680.54	3345.45	2584.74	2843.91	2943	2565.4	2367.2	2028.28	2258.27	3127.99	3040.34	2953.25	2039.82	2316.36	2072.48	2494.89	2943.3
1554697_at	69.766	81.2809	70.9295	83.9204	52.6797	36.4179	194.924	211.779	203.286	339.298	308.883	431.839	115.702	117.073	83.4242	50.5538	51.9308	54.3591	161.101	95.3923	217.815	107.634	124.489
1554699_at	37.2572	48.2599	29.6906	18.1968	28.6387	3.71923	37.8139	20.3351	34.5892	48.5262	52.8106	15.6914	24.8169	18.9387	21.2457	23.1636	30.3968	26.5515	26.3906	40.3116	6.3352	30.7775	43.3387
1554700_at	0.25815	2.73875	0.479793	5.10519	13.3393	4.27208	0.721377	0.714585	10.5923	0.6578	2.90955	0.855864	0.805909	0.127629	9.54272	0.573708	0.746951	1.4493	0.897218	4.07792	0.305693	0.229928	0.429739
1554701_a_at	140.306	133.163	136.83	138.944	132.708	147.305	146.645	128.871	132.981	134.604	115.345	141.371	148.746	136.52	131.307	115.875	170.624	157.467	157.246	108.022	124.828	170.573	124.393
1554702_at	60.6455	59.6964	56.7605	38.8202	52.9996	55.7278	48.8724	53.8895	42.954	28.616	36.5617	14.2607	67.6806	77.9138	90.4448	53.4884	73.2001	75.737	36.33	94.853	55.6015	73.8957	69.0667
1554703_at	378.919	414.037	456.519	363.234	406.225	318.444	387.605	448.353	416.149	380.643	347.141	341.882	369.785	387.891	368.041	403.532	368.904	343.749	463.278	384.676	504.158	418.915	362.658
1554704_at	226.851	284.064	227.036	186.006	328.876	357.211	248.068	201.456	287.49	260.114	299.015	335.487	220.798	250.244	238.916	276.62	279.999	277.152	292.74	221.816	271.259	183.704	225.897
1554705_at	16.9762	9.34456	6.26882	31.6529	36.3121	31.2364	23.9202	15.1012	33.4922	27.0872	19.8711	9.27113	37.5594	36.6686	11.5319	41.6999	49.8501	51.5249	8.79352	34.8523	19.4132	44.7355	3.19329
1554706_at	36.9748	2.09973	13.0941	13.1364	4.77397	2.57366	1.71471	2.22817	2.46832	14.264	8.24641	2.12079	8.39319	8.12808	4.84215	1.38759	1.19949	3.39805	10.5816	4.97041	2.88187	4.29456	18.6935
1554707_at	28.6549	18.4615	24.4602	25.882	39.496	34.9014	16.2584	27.8703	31.0525	35.5538	20.4406	38.1333	27.1483	0.683132	31.0981	29.7196	23.2959	16.2733	10.1074	10.655	2.91172	35.6649	7.21387
1554708_s_at	76.104	64.4928	47.3008	60.8058	87.7913	94.9035	104.608	63.6557	113.256	135.792	152.807	186.54	56.2597	86.2833	95.1796	106.071	96.2387	112.864	123.427	92.7608	97.3563	95.3264	125.356
1554710_at	70.1446	64.3005	51.6254	40.7227	50.8342	46.4055	47.1574	36.5789	45.1393	67.6317	52.392	32.2826	58.4702	37.5202	60.7737	51.9139	45.6995	52.3751	39.1816	48.7984	45.6802	41.7704	49.7641
1554711_at	3.85746	7.81757	5.2673	5.19504	6.58658	6.12201	5.53858	4.32118	13.7396	5.82452	8.19869	4.33405	17.2541	3.6388	16.0232	3.80788	3.47705	5.69492	3.64169	25.7968	5.58598	9.68564	4.1807
1554712_a_at	72.4296	92.0404	46.6411	63.385	47.3345	81.7638	70.9782	56.8627	88.6971	52.4835	39.2094	77.6181	66.5507	63.3528	51.5423	69.7964	85.2359	88.7753	37.7165	63.7087	75.0528	81.291	60.4622
1554714_at	5.29853	1.92758	4.6622	4.01074	5.98936	3.82997	1.62951	4.38121	4.22314	4.6784	2.57342	3.16049	18.4366	3.83439	2.82199	1.37582	1.97322	4.6343	4.34487	6.36051	3.09458	1.88632	5.65067
1554715_at	38.6572	9.744	21.9353	7.43061	7.44774	7.39101	21.3792	2.89141	9.10023	6.37239	6.73889	7.1308	45.1743	3.52928	2.38042	8.94566	7.74847	29.4643	5.00776	4.32217	47.4017	4.85621	48.7591
1554716_s_at	7.26043	5.75873	42.3063	13.0023	11.7298	4.90784	25.3036	5.89682	2.98414	4.77665	2.6941	25.0574	5.18854	3.30467	11.4321	1.62002	6.57823	15.1881	5.23116	6.98297	7.72925	6.1804	6.36185
1554717_a_at	91.3377	82.6635	84.7309	80.1037	63.1736	109.237	113.587	106.795	106.871	120.23	84.185	106.57	80.8593	86.1382	61.012	45.5184	61.0638	44.1729	79.6738	109.094	69.05	69.0501	47.1589
1554719_at	68.0657	108.637	69.0129	68.9099	94.6981	87.6052	80.3536	99.5403	95.2881	84.593	78.1386	93.0795	76.2019	103.298	77.8926	106.509	100.512	111.956	84.437	107.952	95.9861	80.3708	75.1227
1554721_a_at	707.606	650.731	688.317	695.465	576.52	634.936	700.025	715.529	739.891	599.51	545.375	504.268	613.528	647.006	452.53	647.282	624.256	471.891	684.074	587.888	556.121	553.394	573.52
1554722_at	45.3397	28.0031	22.2013	24.0338	28.0862	33.6281	33.0794	26.3517	44.2325	28.9394	46.6121	28.1448	38.485	38.2043	31.2221	24.3326	34.7566	45.1281	43.5022	40.6262	53.2309	32.8715	22.6488
1554723_x_at	18.5829	23.7107	24.5493	28.9698	19.3414	16.1692	6.72832	23.9236	5.54966	14.9437	17.2326	12.6937	36.6631	19.82	32.7736	27.3651	7.0938	23.9186	32.3913	13.1441	34.5743	22.466	3.22462
1554724_at	22.0665	47.4151	32.8002	4.45342	8.00105	27.2801	25.513	28.3389	38.9562	31.8106	13.3657	38.2391	20.6813	31.9137	29.5817	9.50956	30.6714	29.4788	23.5717	35.7	36.4315	27.7387	30.7052
1554725_at	59.3897	16.5146	34.1248	14.7103	18.4183	8.59736	24.6367	32.9647	27.1951	26.1188	26.4178	33.9279	30.3624	27.6435	35.9607	42.3135	21.4806	31.3255	32.4113	22.9049	15.4166	32.925	2.49506
1554726_at	202.601	202.807	173.409	223.57	188.982	182.505	193.828	240.263	178.068	221.636	238.741	174.621	160.718	216.45	149.472	193.993	149.427	145.979	173.375	221.553	196.889	186.64	159.857
1554728_at	71.3222	80.0276	25.537	6.77899	59.3628	27.1025	41.313	43.7178	86.483	43.1386	43.7932	69.7507	75.2753	58.866	62.7546	48.4733	46.3328	61.1795	41.3276	46.6783	63.5768	44.4663	56.7782
1554730_at	143.201	139.79	92.6618	207.252	153.104	200.364	170.815	137.818	173.019	256.167	314.388	367.564	91.5455	131.749	106.87	204.472	163.642	141.288	133.474	50.6643	114.598	194.856	137.059
1554732_at	5.2952	22.2226	37.0873	18.6501	6.75754	27.6662	11.7663	2.82966	28.1739	1.79076	3.10213	4.53295	20.644	7.97728	6.25595	12.437	9.82298	26.9078	34.7051	17.3495	6.09423	22.0374	21.7162
1554733_at	26.0589	28.2107	8.27249	20.8198	24.2906	33.8625	4.99448	3.31759	15.0658	27.6706	22.1627	25.4624	17.8717	3.53597	8.12309	20.7608	17.0333	14.6555	2.43924	3.22165	2.96489	11.6569	23.012
1554735_a_at	129.772	168.423	116.441	113.536	107.238	102.795	125.116	169.506	108.633	143.094	135.031	147.954	86.522	86.9472	76.3262	99.2596	117.794	110.44	51.6304	50.2686	65.5636	121.494	100.471
1554736_at	41.5616	38.4555	43.7305	31.6193	24.5135	25.2075	24.896	26.9245	26.7598	15.196	32.4579	36.7343	40.0253	42.72	27.6636	37.9792	33.526	36.931	42.8309	33.3888	36.073	30.4358	35.3242
1554737_at	95.7585	91.5512	82.1464	78.2485	69.4577	93.7862	160.692	127.95	114.431	192.863	166.52	137.731	84.933	127.311	106.629	69.1606	72.2829	80.2335	111.869	93.2032	94.5547	94.5034	77.3702
1554739_at	34.3475	22.2218	23.2127	20.2389	19.2662	40.2757	23.1841	17.7776	27.6707	5.15197	27.3277	26.4669	20.4536	24.1989	26.9312	36.9822	12.0487	35.268	36.1907	25.2353	38.3837	28.2843	12.1963
1554740_a_at	279.269	250.576	229.34	308.272	291.436	262.542	238.62	231.691	225.758	282.416	309.92	273.123	261.391	253.101	270.086	243.39	285.749	249.583	263.643	255.515	239.622	255.299	257.151
1554741_s_at	183.933	228.777	275.5	190.861	156.661	330.058	171.908	141.392	241.927	163.551	212.16	163.785	126.083	114.556	146.972	134.417	118.814	127.733	104.116	106.249	74.6057	171.643	105.641
1554742_at	110.362	105.629	94.4673	73.8821	92.6726	130.934	99.6527	67.9294	114.144	82.2468	78.5293	118.413	100.625	123.848	118.889	113.677	118.083	109.13	70.2191	89.7407	122.378	81.9617	48.3059
1554743_x_at	133.224	168.862	126.557	138.227	152.725	145.74	117.666	106.059	134.075	121.92	122.178	122.832	125.426	143.631	143.103	138.043	104.36	151.663	109.676	105.406	149.261	110.849	118.119
1554744_at	14.3292	16.345	8.06154	1.3564	1.48035	21.9281	15.847	26.3929	18.9893	3.22691	20.3815	18.7683	6.51707	3.28257	25.8403	5.76353	29.0166	7.33291	22.0312	2.49046	3.50545	22.7329	4.34548
1554745_at	33.9958	7.38589	26.4003	11.1745	23.4039	46.7851	21.8316	40.035	60.4548	7.32311	24.0808	39.3203	5.17365	3.86748	52.5791	21.1236	24.3291	6.6359	34.7119	7.06028	22.3363	31.0364	37.7446
1554747_a_at	744.113	726.507	857.723	834.332	814.539	780.315	916.044	816.079	691.285	863.77	831.496	826.68	1025.4	908.253	845.885	1020.35	989.426	1081.88	964.508	966.656	911.63	1033.58	1145.04
1554748_at	42.9846	60.1721	86.8756	23.8625	10.0246	33.0704	7.45875	51.9042	82.4829	17.8054	10.8869	21.228	69.3161	52.2815	71.4479	9.59621	24.7102	14.269	16.0484	90.3692	71.6692	58.8141	8.07152
1554749_s_at	30.8105	24.4565	42.4029	17.3218	39.7527	56.8835	17.7984	38.9045	47.9263	43.6756	10.7358	25.9123	37.4032	16.0614	35.0323	21.8693	59.9003	35.0097	36.4699	26.3927	38.0033	8.11934	13.9997
1554751_at	35.7066	31.183	32.2614	55.0557	24.0975	21.5919	36.6964	28.8771	30.2391	66.3241	58.4692	55.5267	28.2983	37.6193	16.8193	38.1241	30.1869	41.1925	47.8352	2.28684	33.1781	30.33	42.7243
1554752_a_at	16.0997	7.29845	44.1744	45.35	32.668	45.0887	52.5805	22.5761	44.895	92.7029	61.0072	65.9303	74.8089	78.7474	35.9812	41.4953	46.9602	72.2313	59.8924	23.3393	46.1852	26.3152	68.4331
1554755_a_at	22.8107	14.6007	4.63365	17.8576	15.6019	19.6057	4.95596	9.22354	5.27756	6.62015	2.33646	4.60289	7.64278	17.363	20.9793	0.869414	4.40271	16.3291	19.9236	18.85	6.54829	4.50648	8.34845
1554757_a_at	123.5	128.206	118.377	84.765	108.251	119.066	75.2077	86.6253	74.3321	141.035	139.086	130.882	163.196	116.395	96.7224	94.7618	86.454	99.0002	90.8406	84.7748	78.9472	107.245	124.7
1554758_a_at	36.4365	42.828	33.259	29.6018	8.91753	61.3606	13.3766	21.2556	7.34159	33.269	4.15387	6.82317	4.20956	25.0512	16.7411	4.88287	18.2077	18.171	41.5983	4.53456	19.4671	44.0585	2.81383
1554759_at	3.77321	40.2556	25.0248	2.93813	6.06389	23.1215	7.33403	7.07019	26.6314	20.4413	11.4264	42.146	4.62272	29.6892	9.4262	14.4403	6.44219	29.7525	3.49946	15.1384	25.2169	9.15765	17.9032
1554761_a_at	392.519	433.637	400.573	425.404	397.969	253.729	369.117	431.25	343.006	304.39	294.453	239.649	384.357	387.995	337.087	333.07	307.24	313.597	375.883	466.292	369.06	348.246	234.357
1554762_a_at	352.261	385.953	341.117	288.499	302.796	332.866	352.552	390.953	430.014	339.449	354.358	352.028	389.335	381.431	335.776	320.765	376.276	313.496	453.406	150.717	479.018	385.98	331.368
1554763_at	1.7296	6.68704	1.96263	2.0125	1.85441	5.0417	2.58103	2.14405	2.03183	3.13965	11.0466	1.93013	4.31437	2.39549	2.04664	2.01101	2.08273	6.51995	3.08678	5.3424	20.0901	18.2943	2.39601
1554764_a_at	6.75098	1.36951	8.09541	3.17146	4.28172	26.8787	5.30176	12.7716	9.63488	14.9231	8.76388	2.3974	13.9333	22.401	5.60207	3.45062	21.1316	11.2139	20.4639	3.71661	7.78942	15.8177	0.985652
1554765_a_at	6.4976	30.0444	38.8174	5.94737	6.62555	3.97527	6.54215	7.86295	6.17947	5.52526	3.44969	7.74562	20.1527	5.36813	30.1248	3.76573	7.01968	4.36449	7.72358	7.67555	13.9557	16.4198	3.11418
1554766_s_at	28.8788	38.519	35.8339	24.6492	26.6338	25.7368	53.3066	25.9562	26.8884	45.3194	46.4106	26.449	13.6267	17.097	16.474	16.3276	36.9563	59.037	21.9392	36.6032	36.8638	31.1945	22.3045
1554767_s_at	444.994	384.948	542.231	424.604	471.838	569.004	442.2	463.418	476.392	489.94	456.872	494.435	572.371	533.977	550.222	575.999	577.005	588.257	567.062	466.081	523.343	524.698	522.075
1554768_a_at	4852.38	4233.69	5101.43	6321.14	5875.68	5949.25	4813.69	5109.9	4756.34	6137.43	5971.81	5966.2	5430.49	4512.1	4575.97	6134.59	6170.1	6123.19	4556.88	4863.91	4448.81	5367.38	5498.37
1554769_at	277.235	326.346	238.825	226.166	210.184	268.452	237.195	261.618	262.861	248.229	246.923	235.23	218.601	275.56	269.383	253.046	226.221	222.751	240.217	272.874	259.208	219.162	183.197
1554770_x_at	281.14	296.736	286.085	234.7	218.708	294.26	254.739	308.217	320.685	245.397	228.534	285.929	255.672	317.291	358.973	254.948	291.524	237.677	250.746	234.896	250.89	211.677	169.087
1554771_at	140.153	155.309	121.653	128.137	155.313	179.292	143.676	123.29	134.805	153.599	126.572	108.592	128.436	120.119	114.959	155.042	186.442	166.252	86.5528	145.705	100.363	118.922	127.83
1554772_at	56.1089	60.2714	50.9321	93.3705	72.7288	54.7103	55.3726	57.3821	52.2274	56.7059	74.0324	56.3393	73.9225	70.9634	43.8031	71.1224	71.3757	93.9843	54.864	54.2347	67.9723	45.7681	93.8386
1554773_at	9.41825	6.2903	8.91749	12.6961	12.6505	9.51484	10.338	9.94933	8.57102	8.52788	5.88255	10.0293	9.73774	5.73172	4.77979	7.26058	3.39359	10.4761	8.86604	20.3942	4.47469	6.82742	10.0943
1554774_at	246.412	363.067	345.628	273.518	261.216	225.8	284.921	228.778	171.813	250.393	209.646	212.105	334.902	220.577	279.135	274.767	270.634	279.116	283.09	198.861	270.076	229.793	209.084
1554776_at	21.8098	11.7176	4.84011	3.24889	11.144	7.72833	4.22342	15.2871	7.25918	9.6349	32.7653	5.26284	11.3227	8.35922	16.5214	6.46217	22.535	8.77981	2.23818	6.02062	4.20958	4.1836	25.3068
1554777_at	23.2797	12.3541	14.7812	18.5307	3.1913	36.0724	26.3574	19.2012	14.1087	25.7038	26.1612	12.6349	4.05535	23.9944	15.1776	32.0853	11.5149	35.4291	16.9374	2.46434	19.539	32.7444	12.5032
1554778_at	10.854	17.6935	14.7319	20.741	25.5895	18.2647	31.6597	34.8677	25.2116	29.7167	22.6396	12.0347	14.4736	16.5491	10.9689	35.9049	25.3724	34.2516	30.7701	30.8106	27.018	18.5253	29.3581
1554779_s_at	28.4771	27.324	36.8509	9.80834	45.0459	30.1387	29.2847	65.7695	53.5466	39.89	57.6468	30.1064	35.706	21.4841	36.8036	25.5767	35.9021	57.75	32.845	81.4885	68.8542	24.315	31.7997
1554780_a_at	177.616	202.537	170.989	226.761	215.488	298.213	188.196	188.275	196.441	271.879	260.905	252.822	170.274	202.103	131.376	207.148	219.233	200.099	159.154	157.165	183.955	188.043	169.749
1554781_at	21.8077	27.6954	68.9202	48.4179	35.4928	43.9051	42.0024	36.7978	56.2033	50.4028	55.6785	61.1526	38.7728	38.481	35.9851	38.5676	23.8566	23.142	27.7661	20.5521	44.5662	30.4205	48.8627
1554782_at	69.6739	68.3206	49.1027	45.7637	88.2488	19.1124	20.1248	21.6317	64.4076	29.8026	46.0064	50.2393	85.9963	52.7453	80.609	29.1805	61.311	125.508	56.9238	52.7901	51.7569	47.5245	31.1035
1554783_s_at	74.992	123.357	95.0156	104.547	104.48	53.754	96.15	65.9511	79.4235	86.0847	54.1735	122.103	151.059	130.227	103.984	85.0308	87.5782	83.5964	110.003	87.6143	117.549	89.3879	70.417
1554784_at	36.5538	46.075	41.5948	48.7809	39.1595	31.4253	41.3225	38.9379	51.5	24.7217	19.9372	35.3208	21.6851	26.6531	27.6151	25.2074	48.6683	46.5313	45.0748	33.8562	33.3111	22.4018	35.6434
1554785_at	66.3613	71.032	62.6584	61.928	54.2589	69.3566	129.96	85.709	87.6609	49.1873	66.9676	45.7851	94.6938	94.1393	92.3414	100.232	76.3816	65.7649	116.866	110.355	164.4	55.1167	104.828
1554786_at	4.98802	31.6016	3.54665	2.07615	24.7679	28.9536	18.6293	26.3207	19.2418	23.5797	32.6986	16.8877	3.24932	3.7344	22.221	1.2831	19.6576	38.1106	19.1177	40.6472	15.9503	11.2473	23.3433
1554787_at	2.4814	12.2415	2.8736	2.08664	1.91872	9.88794	2.73766	4.02633	4.89951	2.82549	5.73477	22.3343	11.0322	11.6122	5.68921	2.34098	19.1672	5.06884	1.20839	1.77903	5.60461	2.81122	1.60303
1554789_a_at	26.0518	40.2841	28.3823	31.1448	33.056	17.5733	30.6188	30.2122	24.2187	14.8373	22.5177	3.33306	27.9754	13.8367	14.4179	17.0301	35.1413	32.1958	24.1357	15.2965	11.6377	32.424	14.3129
1554790_at	92.6327	169.024	129.235	123.436	122.905	76.1242	141.475	104.038	102.459	99.8492	57.9206	86.9504	107.288	131.515	101.291	74.4328	110.598	66.3575	100.853	104.258	117.059	91.6086	81.4781
1554791_a_at	38.9512	75.6861	20.5601	106.495	55.2948	84.5061	36.8722	29.1722	55.8534	42.602	57.7934	52.7779	40.7495	35.0352	35.8533	90.9974	85.3484	108.707	25.2474	44.5668	47.7632	82.7609	80.0486
1554793_at	117.497	207.279	107.69	38.798	47.7586	73.646	116.496	69.205	151.429	40.7881	71.1062	114.471	97.3741	99.9743	134.977	95.4646	70.0794	79.0214	123.428	131.338	130.024	108.223	67.8996
1554794_a_at	280.578	240.328	240.396	241.964	205.67	296.129	325.657	331.62	298.73	237.168	263.165	267.78	384.276	319.749	357.294	255.618	295.806	269.636	394.379	349.663	317.544	253.905	313.965
1554795_a_at	961.296	786.967	711.297	557.448	604.703	493.036	1007.7	1019.89	900.776	923.337	745.773	845.116	907.546	923.98	868.709	493.736	506.231	400.689	1304.1	1392.87	1046.69	776.561	586.003
1554796_at	33.0195	11.1462	12.9703	22.0377	9.30007	55.6108	56.5583	36.023	50.734	38.6203	45.0335	62.2223	42.6755	19.5511	40.6387	5.23966	23.0702	45.0498	29.6075	5.5755	21.0715	7.25431	61.1439
1554797_at	26.6636	35.7065	30.173	12.9885	42.9066	26.5406	47.5225	19.5572	34.4642	19.8898	19.467	22.1962	30.7941	21.6523	29.2505	31.9539	42.1389	32.7758	22.0993	27.6236	36.8083	43.32	36.1676
1554798_at	107.879	38.2699	56.5293	38.6149	46.6143	72.2099	84.1014	64.6779	50.9952	91.1116	65.9392	75.5028	43.4621	50.0296	77.9234	43.7187	41.9536	53.4365	56.822	42.9417	63.4587	55.3854	65.4484
1554800_at	52.437	46.9705	18.9647	39.0505	52.3947	71.9763	58.304	44.1871	51.0295	47.4233	43.5414	62.9886	53.4339	67.044	62.0761	18.4427	22.1914	84.4423	30.3279	39.5973	52.7137	48.0966	41.3691
1554801_at	11.7613	20.5444	24.597	27.7028	18.779	27.6748	15.0785	26.679	24.9035	11.9253	29.0154	18.0935	20.841	20.4685	46.6234	30.142	13.7803	31.2766	32.0641	33.5779	27.1027	33.9749	6.89133
1554803_s_at	32.6382	27.9231	22.4696	38.7895	62.6463	11.0702	52.8128	54.9921	24.1311	7.27421	20.865	55.2098	53.083	44.3561	69.647	59.6726	32.4646	63.2555	35.7921	32.9156	39.5727	46.7261	22.9144
1554804_a_at	80.4509	141.176	27.2202	42.5914	33.027	54.0412	41.3428	77.1744	37.7162	31.0483	37.6909	11.5838	17.902	43.6859	87.4114	41.6198	78.9739	76.2185	50.8301	3.37438	60.3625	54.3272	45.8601
1554805_at	59.3855	49.1911	68.2165	32.0587	57.118	59.1376	57.3618	43.7772	1.95075	53.8363	41.4358	55.7321	81.7912	32.4078	66.2294	55.6802	53.7216	71.1329	42.442	16.9529	49.5636	51.6173	40.3706
1554806_a_at	609.02	542.825	624.637	976.586	931.597	987.495	607.28	611.342	654.286	1233.43	1278.75	1097.82	696.099	554.415	672.855	1087.78	1067.15	998.81	712.139	725.575	607.386	1206.81	1086.97
1554807_a_at	431.196	441.443	373.173	369.738	315.99	332.51	396.199	304.435	356.753	241.278	268.184	241.001	492.688	478.205	458.027	332.999	359.565	348.385	604.505	573.96	506.098	356.51	512.221
1554808_at	112.334	76.1192	92.8777	119.208	107.065	102.597	125.052	96.9283	88.4612	112.138	81.4029	77.1581	100.611	87.8882	114.194	83.2897	108.375	77.7927	84.0893	71.0846	83.797	80.4134	103.35
1554809_at	41.1042	61.0549	6.85447	34.9692	70.3411	52.0124	46.2638	70.6975	50.6305	45.3437	37.0811	76.2856	55.8304	54.4603	50.437	42.0096	43.9224	89.7577	18.2328	43.9969	35.1126	29.5721	26.0962
1554810_at	2.93738	5.44515	3.05547	2.56769	6.11658	2.59356	7.42693	31.9205	3.45947	6.76253	3.76069	2.70364	5.10515	4.18176	6.43851	4.76344	3.28984	5.09316	2.45229	2.86332	6.56232	6.13361	7.45865
1554812_at	16.8812	32.3563	16.2955	28.4989	17.1824	4.30918	24.1012	33.2727	19.4194	4.01267	3.40614	5.48934	33.334	26.804	10.3042	30.0013	31.6836	5.60784	5.27032	5.38868	35.0088	2.18539	11.3663
1554813_at	40.1853	46.0354	45.5132	15.5154	19.1209	5.20798	55.8653	38.1126	34.5296	6.48147	26.563	43.1923	54.479	24.8773	25.2802	21.3273	18.9644	38.8363	34.1017	41.8775	16.7901	17.9952	24.6474
1554814_at	160.143	195.409	162.845	124.746	161.653	103.573	163.894	168.745	160.721	126.444	148.224	131.628	150.141	193.801	157.303	174.284	119.81	145.354	111.167	218.848	155.855	98.9445	146.571
1554816_at	6.0505	35.5767	3.2821	23.3092	26.733	49.3155	36.9753	34.6372	26.9023	44.0965	4.06464	48.6938	30.2051	14.9398	5.88397	20.3089	4.25007	49.8823	3.81086	22.9434	27.9983	21.3036	4.85179
1554818_s_at	14.0214	46.7963	31.144	29.3291	21.2607	11.8313	10.3456	13.4796	2.76873	16.2025	11.5161	1.78799	22.5889	24.3201	33.8141	23.1784	1.74637	14.6828	27.8846	34.1042	1.99181	1.95102	10.8397
1554819_a_at	25.6473	114.75	37.7682	41.4492	74.4558	49.2742	17.2111	17.5661	42.9356	118.951	42.3356	57.1628	14.7983	30.9645	49.8848	15.3391	39.6237	36.1521	7.80608	16.9115	24.252	62.8833	78.2852
1554820_at	5.66176	33.9525	9.42055	12.8687	3.11347	6.96832	3.27812	31.2496	8.54602	11.429	42.7483	2.55683	25.1791	14.4202	18.3672	6.1538	18.7812	24.9696	22.6329	7.27408	35.2868	3.96732	22.9162
1554821_a_at	388.79	348.929	385.212	343.916	353.374	343.897	416.772	399.578	350.522	380.386	318.429	357.17	424.115	287.762	364.817	268.404	286.162	289.709	413.809	400.109	361.004	293.394	233.931
1554822_at	150.452	153.437	151.003	147.118	119.628	162.279	106.145	75.2037	178.699	72.723	98.1558	132.464	142.283	102.064	124.196	131.087	115.987	146.282	99.791	111.409	97.268	148.724	89.6903
1554824_at	66.1906	57.0884	46.4963	56.3161	33.7758	60.0726	54.5078	43.7303	24.484	42.1918	93.3166	73.4286	44.6098	11.4042	38.8344	33.5861	51.8577	45.8148	36.9974	33.7096	44.736	43.5428	54.0258
1554825_at	285.083	226.863	329.782	216.828	208.972	222.996	199.879	239.646	176.244	190.64	226.67	197.019	303.321	317.366	340.142	278.912	307.732	241.105	277.278	284.26	271.381	334.474	273.994
1554826_at	35.8808	9.6551	13.3808	5.46062	11.8768	5.79534	13.5503	35.9446	21.6768	9.00544	13.6423	13.1308	10.5538	6.00523	8.60472	22.3911	15.595	31.8312	4.21244	2.04345	16.8203	10.8362	15.6355
1554827_a_at	7.70027	18.4399	6.08856	51.4172	5.67012	22.0478	26.3225	5.72348	8.12214	12.3277	17.371	12.0574	8.39323	7.93775	9.77963	7.94023	6.12536	66.213	11.4236	8.49022	6.143	7.27868	8.96442
1554828_at	26.26	49.4293	38.0582	44.6456	51.3515	23.5763	32.5507	43.822	34.5548	37.4354	50.5794	36.8308	51.2879	33.6764	48.0136	28.4287	63.7797	60.0989	57.1379	51.3259	50.1231	50.0308	10.9038
1554830_a_at	232.788	234.875	219.058	181.149	231.107	144.608	215.158	227.566	283.435	227.347	158.397	180.743	243.442	239.432	271.054	199.231	223.323	177.356	234.675	194.875	187.64	245.816	201.597
1554831_x_at	19.8649	36.327	20.2321	20.8633	6.58532	36.0654	24.0519	29.3036	26.0962	16.9779	25.5754	13.6336	24.3635	11.0762	33.4475	16.6311	18.153	14.7529	22.7528	10.1348	22.8232	18.828	28.3987
1554833_at	39.8304	26.9822	39.2887	32.446	20.3749	38.1778	82.2485	53.0121	62.6264	8.715	35.4443	57.6596	42.8997	32.7467	13.9349	33.8212	13.1574	29.8423	75.5699	72.5534	86.5891	34.0641	43.0471
1554834_a_at	39.9581	17.2768	11.0916	15.2444	36.6187	50.0924	72.4768	70.7877	36.7943	52.0164	25.1526	45.5129	39.1094	4.09957	38.5734	26.1112	8.74834	36.9217	31.8925	34.3869	7.31027	24.793	3.19439
1554835_a_at	124.494	117.798	67.0543	167.314	87.6026	123.791	131.74	156.35	69.8454	139.412	61.9892	114.282	180.948	170.112	155.733	178.935	159.395	164.191	145.61	167.716	176.7	188.814	164.54
1554836_at	21.7356	9.69609	3.93841	10.8119	4.69925	21.9773	26.9159	4.05031	4.61401	25.4947	8.42422	31.3344	27.1092	2.21326	29.4524	3.02359	45.5292	6.27916	9.90568	14.4357	28.0441	2.2515	24.4645
1554837_a_at	83.8812	94.0914	75.1844	60.6862	69.6931	71.3309	22.9615	69.5551	65.7975	59.798	59.2872	82.9542	95.8996	73.6948	75.6408	61.8981	105.703	77.8045	74.4844	22.1583	72.76	79.1251	89.5351
1554839_at	136.516	132.251	149.083	127.207	158.902	146.627	137.819	121.746	141.251	115.742	92.919	84.757	101.101	152.635	120.561	122.776	125.4	178.468	103.725	142.469	135.317	133.609	114.216
1554840_at	100.064	121.746	94.5952	57.8465	66.4861	80.7999	80.7404	81.274	105.534	47.8542	48.3833	45.4615	91.1028	92.7052	119.316	93.4145	74.9955	73.7424	102.83	86.0258	88.1494	71.5155	54.2522
1554841_at	458.522	347.735	496.853	400.552	489.108	694.693	415.556	323.66	440.798	388.347	374.084	385.424	599.488	503.917	568.545	614.084	532.467	629.088	544.177	497.247	490.499	600.928	542.127
1554842_at	35.1817	35.5025	7.7063	29.0776	29.3708	51.0068	23.9967	25.9268	15.9111	49.2229	10.0078	9.33434	9.6338	30.0424	7.28738	7.04678	39.5578	32.4448	58.654	6.34338	29.3079	42.4984	23.8328
1554844_at	36.0045	33.9502	7.70108	30.8171	36.4895	2.87819	4.98557	3.83563	38.5784	28.6724	36.2665	44.9278	56.4395	36.5547	29.5834	21.3276	35.9467	20.357	14.9086	6.07473	6.06243	32.9119	4.29351
1554846_at	5.30291	3.76922	33.3595	5.58463	18.5878	12.849	9.37311	6.52842	27.3139	4.43224	6.96425	6.26617	5.97938	5.59132	4.35905	19.5299	14.8005	11.3387	11.6907	20.3613	33.738	29.0943	11.3302
1554847_at	19.1955	69.582	37.0132	33.8503	27.4681	33.4487	24.8815	41.4773	6.03063	26.9188	28.3581	31.6811	49.3373	29.8057	27.9248	45.3781	67.1465	68.1369	34.8989	69.6654	51.8459	63.6708	56.1519
1554849_at	64.6222	47.2698	73.6862	59.6749	39.7889	51.1987	40.0025	56.8167	75.1955	26.055	60.7738	57.4621	45.0559	65.1958	87.2076	50.1614	59.3305	56.1859	46.2634	65.1078	93.2505	42.976	42.9731
1554850_at	15.7968	26.0313	34.6773	35.9037	42.1018	46.2762	26.9113	33.7762	23.3628	14.0152	4.71305	17.9609	23.5398	17.0591	22.8374	41.1398	11.6417	30.6044	1.62593	18.8259	49.1479	25.6442	13.7591
1554852_a_at	75.0286	29.4933	45.9893	57.2401	45.6023	49.8656	54.39	61.5242	42.8552	47.691	48.0869	59.161	52.1822	67.36	44.1039	48.715	62.8068	50.4353	41.6403	51.2767	46.7481	56.7092	79.4473
1554853_at	33.2785	3.26193	3.58264	10.2862	18.5004	12.4477	2.70675	2.77148	3.12579	3.75253	4.62359	2.4915	7.08708	5.32903	21.8398	9.42072	3.02644	6.43012	3.33996	13.6244	4.0499	41.9156	10.4353
1554855_at	2.48581	2.99218	3.7136	17.1509	3.55364	0.543819	17.6914	35.9191	1.9233	4.05376	9.08321	1.74964	19.6855	10.5167	1.74106	0.963345	0.711134	2.01337	1.81646	13.3352	1.50854	17.1631	4.68162
1554857_at	22.2129	46.4561	19.5204	27.3369	37.1843	46.0374	24.3563	33.2975	66.0516	31.9144	29.2753	24.5818	43.749	36.6492	30.0893	22.105	20.6864	54.5318	46.2628	59.7843	42.2591	53.7915	82.5539
1554860_at	65.1534	20.4624	79.6939	60.8746	81.3306	51.625	77.1618	33.5962	64.7719	73.4795	51.0078	72.9674	50.2155	46.4882	69.9651	73.1586	52.4516	68.593	89.4179	36.5683	44.4871	64.6421	62.5531
1554862_at	68.8011	61.7056	45.972	46.7272	29.5414	55.512	47.0933	50.4488	50.5606	43.6668	75.7422	59.4256	49.7893	32.3569	60.6768	48.3228	27.4631	30.7666	32.3893	29.4016	61.3216	44.4843	51.4099
1554863_s_at	43.447	29.1737	17.2481	49.8105	62.4372	28.0133	68.7532	25.1705	113.936	9.11952	53.7143	86.1416	56.2704	54.4371	51.685	10.6501	27.421	14.4144	20.5371	42.4901	116.414	17.0885	35.0382
1554864_a_at	22.137	9.02411	28.4209	33.3969	69.1201	12.7649	7.89833	59.2782	52.0623	81.5513	61.3207	36.3648	42.7877	39.4086	8.21182	26.2855	51.643	44.1854	23.7837	55.6232	56.6671	66.5404	50.7489
1554865_at	75.508	47.9648	22.6528	66.0354	39.0422	50.3931	57.6771	41.9493	35.102	45.2421	87.997	87.9244	110.046	14.6792	70.1639	31.7986	41.7251	65.971	41.2759	60.5809	62.1917	74.744	70.0069
1554866_at	40.9902	21.2561	50.9631	27.1584	18.3005	28.3131	26.1164	49.5292	34.115	38.3206	9.58109	26.1039	5.14249	20.8019	18.15	50.5762	28.0778	24.6008	50.1041	3.38412	37.7457	42.7376	32.8997
1554867_a_at	124.74	113.982	118.339	111.319	80.6936	98.0852	134.111	46.7778	65.1812	99.1262	111.449	95.157	100.647	94.5865	80.7954	64.6993	48.8777	86.4883	66.6384	66.0033	62.1446	80.7268	58.8167
1554868_s_at	2784.25	2739.64	3014.95	3062.25	3022.1	2984.32	3031.3	3001.88	2598.68	2925.26	3222.97	3000.73	3359.1	2951.9	2564.94	3020.02	3099.44	2953.54	3199.94	3181.44	3010.95	2798.72	3041.48
1554869_at	111.874	75.5831	57.6146	90.0931	112.531	88.2838	110.214	110.214	96.0189	112.328	136.221	147.291	96.1942	98.3293	148.784	125.316	146.356	186.009	76.3919	122.767	158.123	120.149	139.931
1554871_at	15.9794	10.6565	4.14454	8.42905	12.6921	1.95221	2.03264	0.833345	13.315	14.0978	9.71688	15.3694	15.2546	1.22022	1.75166	1.10838	4.44012	13.8314	3.46548	23.3132	3.61908	1.9231	9.26892
1554872_a_at	4.58242	9.2388	8.52197	4.11624	11.2707	2.72178	5.12675	5.59798	3.2309	6.89354	4.91592	6.4551	5.61591	5.76426	4.79145	6.14434	8.2052	7.09633	4.08139	4.80731	8.14588	3.31531	2.88975
1554873_at	250.883	202.357	220.947	199.798	171.598	233.467	270.762	176.937	194.632	244.136	177.145	198.84	203.612	174.432	187.363	225.495	205.996	235.548	215.862	208.509	174.442	198.397	136.222
1554874_at	22.1374	15.1053	16.7651	20.6508	2.80144	9.37353	1.32099	11.4244	0.758185	8.323	13.924	14.6769	19.4435	13.9345	1.23166	15.524	3.74534	46.375	17.7924	2.36888	25.4313	17.5858	4.39341
1554875_at	50.9114	19.7767	6.98148	3.65041	9.48557	2.34605	6.98318	26.3438	32.3393	2.36582	3.68806	13.3525	14.8069	26.6559	24.6329	8.44098	4.65488	4.22545	33.2794	5.20324	47.9638	4.11657	3.70591
1554876_a_at	8.7684	10.1279	10.4442	4.87912	4.62619	21.2623	12.8555	8.48899	11.8116	23.5332	38.0524	17.047	6.16952	12.1296	6.92974	21.1134	1.6878	22.6152	15.9014	19.0752	11.5226	5.54791	7.89157
1554878_a_at	783.739	730.752	730.406	616.158	594.505	723.218	748.341	732.053	742.904	379.686	363.346	375.749	952.389	950.305	835.404	750.321	685.472	711.198	888.939	913.509	858.63	608.971	567.08
1554880_at	60.9788	35.034	94.8232	62.9131	92.7446	115.42	71.9449	84.8027	89.631	58.6688	66.1725	70.1932	80.8318	83.9969	53.8752	79.2411	39.3479	122.951	68.2421	77.5199	73.3608	38.6606	65.1295
1554882_at	56.7168	97.7726	52.2418	38.4094	76.3695	69.6784	61.4989	42.4205	131.238	62.7484	51.0333	77.2153	55.6763	97.4842	82.1649	96.6584	64.0209	99.0383	69.1477	73.8363	72.5871	76.6688	46.4398
1554883_a_at	424.365	320.295	462.177	456.834	414.476	478.788	387.735	471.149	407.086	407.389	397.117	396.047	482.025	452.141	428.529	442.681	524.361	518.099	449.969	574.199	427.87	472.005	540.221
1554884_at	42.7868	22.1577	34.0176	3.9319	8.60191	30.0814	25.0077	35.8418	16.299	18.7562	15.6887	35.6957	23.0406	23.8331	10.136	42.1652	9.11487	2.94189	9.39985	3.83675	34.3209	9.05553	11.8542
1554885_a_at	273.075	257.371	330.204	360.675	387.696	361.023	288.139	256.226	262.717	332.573	305.366	408.798	279.92	275.113	236.684	382.3	306.174	267.411	306.72	209.227	342.861	295.666	427.097
1554886_a_at	5.29085	6.66846	6.11506	20.2708	10.5099	14.8183	25.4133	33.1205	4.51998	27.2032	3.16094	26.8555	17.7546	5.43098	24.8969	23.565	4.94612	5.78793	6.36919	31.7538	16.4258	29.1609	2.42692
1554887_at	292.52	310.371	322.581	192.912	181.541	231.56	302.069	283.056	356.058	187.106	200.28	163.041	285.18	305.041	349.576	226.333	235.203	186.113	334.937	348.321	269.039	209.069	119.295
1554889_at	91.4343	132.726	118.756	111.109	94.7858	172.44	104.766	105.348	83.0103	112.66	112.161	187.812	125.357	112.248	76.7444	103.883	115.227	119.537	103.318	170.234	105.323	120.498	63.6176
1554890_a_at	278.512	237.003	263.055	397.827	340.633	335.805	243.087	262.79	239.361	282.771	293.882	246.277	305.472	226.068	230.396	400.948	329.854	270.949	242.43	275.514	245.969	378.681	283.517
1554891_at	44.4694	20.5788	38.1102	14.72	14.536	9.33703	8.09923	23.4753	47.1464	25.0762	30.2452	12.343	36.9729	50.026	8.24216	54.6012	11.5393	17.1143	7.95348	6.62634	9.58419	13.292	39.783
1554892_a_at	9.51234	48.969	28.5852	5.91476	5.61355	38.1343	4.35473	19.8271	48.1746	30.6457	8.12304	27.9992	14.6589	5.55374	7.08626	19.9652	40.8448	37.0706	24.9331	19.1727	3.2665	6.67081	8.52828
1554894_a_at	570.174	576.285	526.06	528.356	593.52	660.383	555.232	487.586	503.154	623.581	542.853	528.012	706.11	719.031	620.023	773.683	752.592	718.796	681.046	673.915	664.089	694.944	594.926
1554895_a_at	14.0321	5.39818	5.06841	5.10325	6.79184	8.41519	7.9354	13.2449	16.2744	32.7713	26.9998	26.4133	13.8781	3.68496	21.6114	43.2123	5.23511	7.25018	3.44507	6.36227	14.0841	36.2642	4.87213
1554897_s_at	73.2701	61.2757	51.4574	114.097	85.5644	110.715	70.2457	43.7883	55.4048	87.9333	100.162	93.4869	56.7449	49.0708	54.7063	114.024	76.1634	48.1539	104.291	103.28	54.8002	118.104	158.242
1554899_s_at	8.00064	41.1707	24.2086	49.9877	48.4332	17.1716	40.3978	41.0548	36.7351	55.2522	86.4494	87.2683	36.0674	30.4262	22.1878	50.6783	51.5556	44.1034	36.9658	39.5391	32.3294	42.4883	23.8736
1554901_at	51.8894	36.7751	37.0051	28.9804	25.3402	33.8519	41.9509	22.4119	37.1937	51.7741	39.9337	45.2931	34.8637	41.0086	21.8444	47.347	30.5452	47.5913	12.6156	36.3937	51.9118	42.3873	42.5221
1554903_at	77.6782	73.2036	101.821	113.201	103.861	57.6258	83.0849	116.238	51.534	99.7125	123.034	67.6719	56.3246	96.6338	67.7678	44.0379	126.083	61.8319	93.2075	111.118	95.0079	79.815	71.68
1554905_x_at	94.3582	119.588	121.231	59.1644	119.894	125.017	102.46	109.045	52.7435	108.224	128.819	92.5168	98.5946	42.8288	49.9518	74.7576	42.4463	32.2855	95.7827	81.4584	109.271	45.4399	119.832
1554906_a_at	174.864	115.858	93.0859	106.725	63.7785	189.92	126.776	114.049	119.924	140.599	152.045	115.064	80.3919	104.323	92.6472	83.2106	64.6332	112.078	120.682	213.794	107.796	83.7359	80.539
1554907_a_at	49.1043	75.9078	55.3135	29.1865	43.6946	79.8539	50.7806	55.4731	45.7646	30.0996	50.1738	51.5815	40.5253	24.1493	32.9471	46.5552	22.7394	25.2249	37.934	58.2241	51.7649	41.3142	62.5912
1554908_at	1.96849	10.8418	7.7094	8.1616	9.1674	3.18513	8.18954	2.67386	8.6232	21.8806	7.645	28.791	7.18706	7.02087	10.0654	5.95863	7.45242	2.69637	8.51233	4.50983	1.29632	1.39699	12.1292
1554909_at	30.8238	25.4672	19.9833	5.53892	10.093	23.2022	26.1531	4.24977	3.04729	25.1624	20.0892	9.88941	2.77425	27.4809	49.0129	36.622	23.743	54.1745	2.28649	28.6163	3.66988	27.194	9.86711
1554910_at	48.7411	70.3292	74.6866	58.0948	57.9302	79.7024	44.485	66.3349	56.2105	72.1291	69.0308	91.4253	45.5402	57.7274	52.3008	61.6959	73.1119	65.4974	92.7853	39.2878	65.7111	52.3519	65.0002
1554911_at	38.2333	39.5489	45.3984	34.3217	15.048	19.3911	23.4372	13.8834	47.8961	43.1403	39.5081	41.8226	64.5883	47.091	41.639	39.1946	34.5365	51.2897	33.0472	54.8326	50.4348	41.7719	44.3583
1554912_at	43.4387	58.3316	41.9878	37.2064	47.0674	55.3243	36.3519	57.6723	50.0105	43.5442	59.736	54.7613	21.6135	49.8439	48.0847	35.6805	23.7332	17.1494	39.6129	53.6935	39.4735	42.5063	24.6689
1554914_at	18.2269	75.8826	22.4975	32.5867	21.9413	25.9531	18.67	3.6269	29.2268	26.7883	33.4124	38.259	3.66995	59.7976	3.11797	23.0108	29.5546	44.0187	5.57811	35.4098	25.6831	51.6957	3.4607
1554915_a_at	823.967	813.527	743.379	441.691	555.73	614.193	839.254	847.999	877.538	512.794	630.394	496.38	661.925	681.487	732.88	593.258	553.656	500.144	684.897	621.343	673.68	560.893	558.011
1554916_a_at	45.0251	49.3525	60.7572	55.9434	88.9595	100.649	71.1409	56.278	61.7572	45.6574	65.6944	67.2409	77.5458	61.5552	76.4702	58.605	81.3868	83.2773	68.0121	65.4472	57.0419	67.9832	60.1377
1554918_a_at	374.891	363.404	299.422	324.57	271.352	260.77	387.343	369.529	316.578	254.58	253.034	151.1	398.301	411.494	268.883	319.109	237.768	229.368	302.842	276.93	305.532	251.033	234.699
1554919_s_at	80.9506	86.4045	50.5151	83.5257	70.6302	88.634	98.7964	79.1099	100.434	115.105	143.074	164.372	50.6791	44.393	48.9979	48.3199	60.0154	50.0871	54.7191	38.0692	41.8241	44.7798	42.8898
1554920_at	15.8887	17.0854	1.97877	23.6293	9.65341	11.6749	17.9744	18.5497	12.1294	15.117	7.00964	9.41608	8.4564	18.6721	22.789	13.0881	11.2642	15.1908	9.98284	14.5145	14.9033	11.333	22.7972
1554921_a_at	3.46977	3.90487	16.129	22.8073	19.8446	51.5623	4.89507	11.6511	7.57249	12.739	24.29	22.3063	20.9118	13.3321	3.64515	132.434	95.9045	86.858	11.1733	21.258	28.1198	138.001	108.531
1554922_at	26.3797	39.5492	19.0766	8.45688	7.19434	29.2088	33.6272	19.1926	28.5021	21.1347	5.6321	9.24289	30.027	23.0355	19.6518	8.19733	14.6765	6.4183	27.8316	10.0347	27.0474	5.99472	5.34027
1554923_at	54.4306	52.9642	64.4218	63.7781	57.5796	42.7223	48.7204	56.4231	65.0166	64.6142	54.4585	72.6858	34.5595	50.2519	64.7196	63.6381	41.1497	51.794	54.5884	27.2494	78.1541	47.9165	42.8079
1554927_at	6.52736	32.4842	7.84432	6.03295	47.2552	6.80673	3.53905	7.51924	3.50408	9.98438	2.033	29.4525	33.522	5.44541	27.0289	6.13045	3.85675	7.48057	8.35747	51.5272	34.4655	2.80623	7.39933
1554929_at	25.4144	9.56648	14.8416	16.2008	6.31315	15.0387	35.992	10.2247	27.0323	4.89752	18.4924	2.76308	25.9628	16.1887	13.5053	17.9252	2.65799	13.7554	13.3877	16.32	27.8157	1.6937	10.9445
1554930_a_at	222.818	302.434	172.747	213.051	235.718	255.949	170.041	164.938	191.813	325.992	273.059	278.65	224.96	226.018	200.253	284.044	203.348	257.283	167.106	231.129	181.48	245.813	219.868
1554931_at	5.04294	30.5942	4.14505	14.6731	6.44498	2.32873	6.94775	19.4444	3.60858	21.1203	26.3401	2.96929	3.67538	3.51788	41.4655	1.1755	14.075	3.96725	18.041	25.6172	4.68491	30.6182	2.77877
1554932_at	16.9125	35.2973	3.3767	16.878	30.0595	16.6934	10.8239	27.1171	33.84	9.95422	20.876	28.017	11.2397	1.64275	15.7964	16.0549	15.283	4.98094	2.11208	20.0481	21.3667	30.9672	12.6696
1554933_at	47.6742	35.6658	34.9769	31.4764	45.9451	40.1466	40.6513	39.0975	42.5023	53.4878	52.9863	42.099	29.1531	36.2011	16.1998	59.4905	45.9567	38.2232	31.082	6.17564	37.592	34.2826	37.3925
1554934_at	20.2465	24.9881	20.4847	14.69	19.5639	24.2945	28.3488	20.8883	15.5105	24.1521	33.7163	54.3489	11.9038	18.4174	33.3246	23.2577	46.9115	35.6709	27.027	35.1508	26.8066	14.2387	35.6032
1554937_x_at	4.27033	7.35815	7.68663	14.9848	50.0039	20.3928	9.25209	5.62951	10.7669	4.89701	6.94045	46.4447	11.5955	13.5	8.02305	4.08787	10.7281	52.4228	5.04277	6.68364	10.5871	28.3125	3.58452
1554938_a_at	32.685	74.9123	70.8349	41.8326	41.8459	8.76209	18.0867	60.7348	11.6703	63.5776	37.1512	48.4637	31.4956	10.5007	33.8679	40.4163	28.8046	46.0485	2.74322	25.337	3.1664	54.0545	10.379
1554940_a_at	7.40348	31.1282	23.5055	24.2235	44.3162	13.1804	14.3937	6.30101	8.2003	20.0159	45.0831	24.7003	23.2736	2.54199	4.26511	27.8004	22.328	7.02879	6.01632	23.047	38.9632	7.18236	22.4349
1554941_at	14.3233	38.0583	22.1227	16.0598	30.152	4.24613	19.7813	23.5361	21.6572	31.5293	14.0517	1.50036	14.5246	8.49862	27.1675	29.6861	30.9568	43.0345	16.3688	21.925	16.4502	12.5634	21.1425
1554942_a_at	13.3158	17.0357	21.0951	33.6156	11.6407	18.4135	16.665	9.74464	21.4883	11.7493	39.9119	32.0861	33.7175	22.4534	61.4493	9.49203	28.3917	21.4442	7.36895	78.5494	8.74764	20.4558	13.2362
1554943_at	27.1962	8.4329	7.60301	3.94166	5.61019	39.5058	25.3504	16.6868	5.25596	4.6589	10.4678	5.28213	16.1076	33.3531	14.0476	8.22053	40.8147	69.3547	8.66814	2.21757	24.0745	5.30601	10.2289
1554945_x_at	15.4791	6.06403	9.92702	3.16165	8.07228	15.9297	2.53443	3.82419	39.4085	14.2496	27.7882	51.6081	18.0063	3.62467	29.088	5.50099	27.5807	9.46343	19.5121	20.8733	5.57197	33.5417	3.58169
1554946_at	29.9427	22.2767	26.5063	21.801	21.5098	3.09239	16.9892	14.7348	23.7719	30.7492	21.2114	34.2545	18.2654	9.47045	25.5459	11.6055	16.8856	32.1896	9.46916	34.1879	30.7512	7.39785	20.6188
1554947_at	40.4308	97.5779	71.185	45.4471	44.249	55.3706	33.5106	46.0364	62.0196	56.5125	35.3409	40.1975	62.8202	25.0826	46.1138	49.3104	50.4573	56.4267	53.0933	41.8659	47.0121	36.5224	49.2269
1554948_at	620.868	578.154	739.94	680.901	876.068	585.743	627.976	656.356	620.754	580.68	610.849	763.823	559.025	741.499	622.035	644.378	599.971	628.097	438.362	484.242	598.201	728.641	605.579
1554949_at	434.18	402.736	584.869	1047.98	1041.49	957.763	281.527	274.257	224.521	685.702	714.498	723.124	319.499	429.163	261.262	1000.27	1081.16	1047.79	265.532	281.562	288.144	886.949	887.427
1554950_at	12.4888	2.90424	55.7434	32.378	6.73543	22.8279	31.804	28.2679	23.0558	21.819	32.0945	7.74663	12.8648	15.5648	48.4745	28.0599	12.0651	10.9327	7.92237	6.35992	10.4207	14.2651	27.0879
1554951_at	37.5804	56.2194	52.814	50.8901	50.0503	43.9955	32.5031	37.9768	51.0534	23.0986	20.7489	92.1926	46.8083	68.557	65.1885	42.9566	28.0329	58.7247	43.0692	42.8778	76.3659	69.6385	51.9144
1554952_s_at	44.1957	25.6223	13.5912	77.3021	93.5754	10.573	91.0551	68.0988	40.348	59.4277	31.1058	103.306	75.3321	14.5714	66.2489	59.4643	80.4938	59.419	23.9556	62.2635	62.7226	10.9351	9.33089
1554953_a_at	5.6524	4.89013	5.02689	2.1553	2.95171	12.0273	6.89759	3.47424	4.46447	5.6138	8.36759	9.61294	3.3223	4.50732	4.93909	3.96539	3.66428	7.6103	3.16558	1.70381	6.71147	3.02117	6.26662
1554954_at	5.76436	24.3394	47.9152	34.7463	58.6699	34.4624	32.4952	47.7457	46.571	24.5432	32.2341	61.5584	33.8199	27.8717	27.2929	28.5392	60.7608	40.2819	39.8414	30.7413	32.1355	40.0043	30.4394
1554957_at	3.14322	6.85809	26.8293	37.1975	4.68167	30.2867	28.1863	37.2099	42.1722	5.62664	48.7168	24.5064	44.0834	20.7451	24.9037	35.3926	6.9234	32.5325	10.4442	13.844	14.6861	29.949	45.7746
1554958_at	32.5606	53.1084	27.9126	87.2088	32.5273	61.9364	17.687	48.982	54.0634	58.846	42.179	26.9088	64.8989	39.4841	43.2221	41.3209	66.9645	32.4646	48.4719	19.1344	39.2639	31.1996	63.4018
1554960_at	56.5303	49.1601	50.3373	39.7665	28.3151	31.5335	56.3032	57.3125	58.2981	18.6789	34.1175	22.1278	82.4049	78.6059	91.0935	44.6718	40.1208	39.9387	129.496	115.404	146.435	79.3936	57.0688
1554961_at	5.33027	7.61936	36.2075	5.61859	37.3345	4.12633	7.1542	4.48278	4.51905	9.46924	6.87895	7.24116	36.1332	8.52341	6.39427	23.9211	4.04357	20.3399	5.32445	2.94689	3.63502	8.84485	36.1518
1554962_a_at	2.30709	45.4542	42.2492	29.5032	45.8527	69.1804	27.7553	51.3691	38.29	11.2156	37.2318	28.104	53.121	11.7045	35.7683	7.64627	30.8201	8.92223	55.0363	15.3384	12.4065	52.0475	43.5064
1554963_at	202.819	149.833	188.148	191.032	236.637	209.527	236.512	181.373	276.741	155.838	200.988	215.61	194.051	230.452	151.736	223.269	214.796	175.248	180.498	136.986	159.794	171.15	155.655
1554964_x_at	199.265	117.712	160.353	135.64	166.275	169.115	150.479	155.687	162.26	137.204	162.453	135.354	135.663	126.325	115.838	176.831	142.751	169.932	115.713	128.569	131.757	131.252	84.055
1554965_at	6.66677	1.0465	38.7541	17.1447	21.2093	27.6354	5.75115	10.3532	13.4999	11.5802	17.9022	14.9834	15.1895	16.1833	24.5806	2.44009	19.1447	2.5753	19.9094	31.5924	3.76149	2.88213	14.3603
1554966_a_at	24.0105	59.0931	11.7756	19.0119	39.7072	49.8019	22.2137	28.2626	21.1615	3.83571	5.44576	8.51464	44.9804	4.93901	35.0405	26.4438	6.49423	27.8688	56.8155	41.7779	54.184	9.74373	28.9612
1554967_at	22.6123	36.77	39.5466	18.7279	14.159	36.0161	16.3846	34.6346	34.3778	35.7345	24.9987	69.6296	33.2013	63.9714	33.5014	26.2429	31.6084	31.8978	54.9413	41.0171	62.8239	38.4126	49.1057
1554969_x_at	36.566	18.5324	76.9019	29.0074	38.0053	39.8551	39.1676	65.1036	45.8185	41.5267	56.1938	35.1671	69.4669	13.3625	46.1225	54.7913	46.4615	48.7449	72.6037	78.3211	62.9653	21.6006	10.603
1554970_at	56.8717	55.4944	51.226	25.4365	45.7543	39.5183	41.3835	29.7753	66.2669	28.1503	22.336	43.1181	47.9848	48.3857	19.7193	81.3247	37.6578	74.3803	21.0852	14.1135	34.181	38.8682	39.0664
1554971_at	17.1374	44.2872	35.2796	24.5751	18.2887	34.9697	25.654	30.9315	25.2368	19.0873	28.3318	49.4961	40.561	40.8771	47.2897	30.8323	28.575	28.461	15.3807	24.0546	29.223	19.9256	33.2718
1554972_at	64.817	78.3166	32.7183	72.6005	61.6376	84.1537	73.4354	71.176	78.0771	11.3101	35.6587	32.4187	95.7688	62.6347	62.943	79.4256	71.4848	80.7667	83.7351	61.0715	94.3074	75.5821	96.3946
1554973_a_at	3.13185	36.0677	42.5589	12.5002	29.033	12.9479	44.0297	29.7527	26.6846	14.7662	36.3741	15.321	21.1299	23.4506	55.2844	46.6513	30.2918	18.7326	25.677	39.1057	44.0545	20.0477	26.9519
1554974_at	25.9191	69.0965	26.6608	17.0188	27.6165	23.899	53.0005	20.5122	9.02739	14.0029	46.3333	39.597	9.97224	28.6152	15.9085	21.1977	7.80062	77.4359	6.83787	68.2844	11.2242	11.0086	50.3803
1554976_a_at	4.47232	5.19881	11.1333	3.26854	3.24922	1.9759	1.44905	19.3412	5.52809	3.29917	1.04421	10.9558	3.44849	2.52898	3.73613	4.21355	1.40203	1.79425	3.08513	12.7939	5.11539	4.49394	1.76548
1554977_at	16.1345	48.258	45.2631	63.9111	61.4416	32.6434	41.3023	84.274	46.5274	48.648	72.1706	109.592	70.6836	86.6743	50.3377	65.2821	70.1618	95.7325	71.6683	125.902	79.2252	69.9164	74.4119
1554978_at	14.9889	14.174	18.689	5.10574	3.07994	29.9402	16.4164	21.2249	12.314	8.66872	29.3903	25.2304	22.1243	23.1044	3.33674	7.83714	8.24533	4.11512	21.629	12.6384	26.0815	37.4478	11.0468
1554980_a_at	73.6346	89.6664	101.868	137.965	84.9434	79.7278	173.223	191.134	203.003	297.12	252.96	307.103	140.605	97.5944	122.187	97.591	90.5991	84.4788	204.328	177.037	232.201	126.589	89.739
1554981_at	6.08677	18.9824	10.3515	3.82977	2.73981	23.5053	3.9037	26.0062	31.0845	10.4137	44.0931	21.4814	20.3462	26.1978	17.9915	32.1184	3.96149	31.9105	3.76635	34.6552	30.3252	28.916	30.9735
1554982_a_at	15.178	5.83382	9.007	18.0597	21.9761	3.00161	19.5843	2.67667	3.89102	3.44777	1.39401	3.61368	20.0575	2.02136	6.58152	3.19575	12.8736	2.3122	4.0653	16.3067	13.1	10.2944	26.7847
1554983_at	55.2685	17.036	44.2212	26.7002	44.6926	24.1795	28.2903	28.5397	35.0472	28.8779	46.4322	34.9162	37.525	27.48	24.3799	16.6354	14.3216	5.37724	17.0756	14.3604	20.0218	33.2458	3.20649
1554984_a_at	59.8045	80.0118	66.3491	91.8933	66.6455	32.565	69.7891	64.7473	99.2207	59.9239	68.743	48.1651	94.6278	73.9271	85.0815	46.0578	78.3611	54.8274	64.3902	81.1778	120.527	90.0428	61.5578
1554985_at	64.386	56.8559	70.921	53.9356	53.2631	93.8379	54.3517	54.3572	75.3689	59.961	80.2162	65.5256	34.0029	60.341	73.7757	74.3459	63.9429	51.1648	92.3242	64.216	78.4129	63.0299	72.7042
1554986_a_at	85.9783	66.0109	100.863	69.6843	73.8303	74.7625	71.7292	40.6884	62.1741	67.1901	70.3763	73.4527	53.0416	58.8076	79.7819	58.0933	73.0784	59.1222	78.7025	57.0916	80.7228	52.3905	45.8439
1554987_at	58.1429	127.809	117.255	79.1637	64.1109	82.6816	91.9852	41.9611	98.1108	129.061	73.9947	115.967	102.129	65.8951	80.938	92.0915	97.5582	79.6914	93.673	83.7029	82.425	79.6771	119.962
1554988_at	2.95485	12.9855	1.73547	1.49099	5.64421	15.3603	1.18735	2.9615	1.56196	3.29392	1.96109	24.3345	1.3986	1.9494	9.19827	3.14877	4.99533	2.65743	14.2032	2.68051	1.63834	4.72442	2.29828
1554989_at	47.7571	40.0937	39.604	21.436	15.1735	18.4942	51.5252	45.5858	40.0936	40.2945	7.27535	12.1068	17.6497	31.9676	69.0751	40.8625	57.7469	24.7564	56.038	45.2899	23.0702	40.5481	45.4283
1554992_at	8.05069	13.6504	11.9213	26.1489	9.76093	6.62964	32.1737	7.39237	7.20013	43.3275	7.81458	5.43456	27.7899	5.99462	7.57104	18.1267	27.5913	42.9528	9.78118	7.60553	7.06251	3.53349	27.2185
1554994_at	37.054	42.889	31.7278	34.047	36.5127	11.6579	60.0094	12.5662	23.9275	25.7159	33.809	24.1722	54.8733	42.3417	21.4379	21.93	18.9286	57.2539	36.7029	30.8922	19.5659	39.3013	10.0541
1554996_at	20.6748	20.415	24.2298	3.62173	24.4363	3.59662	4.14137	23.3913	5.4711	30.6708	37.1157	22.5676	11.9003	17.8437	9.60439	21.8464	4.02064	18.1909	12.1928	15.9117	19.1443	6.61765	7.19182
1554997_a_at	74.4418	102.758	72.134	72.6794	44.5967	46.2603	237.021	240.194	214.692	148.387	112.679	110.453	242.119	249.339	229.406	58.4935	43.023	52.2677	586.463	488.913	600.513	155.528	109.576
1554999_at	7.09275	5.25541	33.5338	2.02467	4.18899	2.29865	27.6559	2.22487	1.8553	2.1714	4.67194	7.17873	21.7042	5.52815	16.6336	21.5436	17.9518	21.7393	1.90636	3.48183	9.65406	2.16653	15.0566
1555000_at	31.6697	8.71908	31.9654	11.133	27.9785	19.1649	23.1879	28.055	20.5957	23.8132	21.92	35.4316	29.2473	23.9063	39.35	24.4801	21.3652	41.8676	20.688	25.5205	24.5702	33.9169	23.1702
1555001_at	36.544	35.2877	32.8663	6.01062	18.4677	19.6854	23.3331	15.4908	19.2974	35.2082	27.4328	29.8488	6.02069	21.434	6.471	17.904	28.9238	36.1319	34.9781	16.818	33.5921	15.3013	18.1296
1555002_at	16.198	10.8545	3.02094	6.84451	19.4436	1.56017	20.0887	2.21355	5.88656	25.3131	16.3203	2.40234	23.5374	23.9103	2.74111	12.9924	9.44146	2.83206	19.9283	16.4038	11.9111	19.2457	1.00483
1555003_at	40.488	18.4005	12.5163	22.2231	30.1527	47.5658	39.2417	21.4272	32.1348	28.921	27.7635	9.41523	22.4802	22.3988	19.6303	30.3501	7.84883	27.2981	26.6614	2.77525	12.4556	23.4353	12.7836
1555004_a_at	113.131	125.298	81.9531	168.364	138.272	110.169	76.1854	68.7156	101.758	92.7399	122.741	100.294	111.67	120.517	86.7836	110.024	110.87	72.3347	103.073	113.871	114.522	129.203	97.0654
[truncated: 52,677 more rows]
